# Supplementary material for: Single Primer Enrichment Technology (SPET) for High-Throughput Genotyping in Tomato and Eggplant Germplasm
Source: Front Plant Sci. 2019 Aug 7;10:1005. doi: 10.3389/fpls.2019.01005 (PMC6693525; doi:10.3389/fpls.2019.01005)
Supplement: TABLE S1 — All the resequenced accessions of tomato used for SNPs mining. [file Table_1.xlsx]

## Sheet: Supplementary Table S1
Supplementary Table S1: All the resequenced accessions of tomato used for SNPs mining
S. lycopersicum accessions			S. pimpinellifolium and S. cerasiforme accessions
150 Tomato Genome Resequencing Project	AGIS 360 Resequencing Project		AGIS 360 Resequencing Project
RF001	TS-1		TS-105	CER
RF002	TS-3		TS-106	CER
RF003	TS-4		TS-107	CER
RF004	TS-5		TS-109	CER
RF005	TS-6		TS-116	CER
RF006	TS-7		TS-118	CER
RF007	TS-8		TS-120	CER
RF008	TS-9		TS-123	PIM
RF011	TS-10		TS-124	PIM
RF012	TS-11		TS-129	CER
RF013	TS-12		TS-134	CER
RF014	TS-41		TS-138	CER
RF015	TS-42		TS-13	CER
RF016	TS-43		TS-144	PIM
RF017	TS-44		TS-145	PIM
RF018	TS-45		TS-148	CER
RF019	TS-46		TS-149	CER
RF020	TS-47		TS-14	PIM
RF021	TS-48		TS-154	CER
RF022	TS-49		TS-156	PIM
RF023	TS-51		TS-158	CER
RF024	TS-52		TS-15	PIM
RF026	TS-55		TS-164	PIM
RF027	TS-58		TS-165	CER
RF028	TS-59		TS-16	PIM
RF029	TS-60		TS-17	PIM
RF030	TS-68		TS-181	CER
RF031	TS-69		TS-182	PIM
RF032	TS-73		TS-187	CER
RF033	TS-74		TS-189	CER
RF034	TS-76		TS-18	PIM
RF035	TS-78		TS-19	PIM
RF036	TS-80		TS-202	CER
RF037	TS-81		TS-205	CER
RF038	TS-82		TS-209	CER
RF039	TS-85		TS-20	PIM
RF040	TS-86		TS-213	CER
RF041	TS-88		TS-216	CER
RF042	TS-89		TS-219	CER
RF077	TS-90		TS-21	PIM
RF078	TS-93		TS-221	CER
RF088	TS-95		TS-222	PIM
RF089	TS-100		TS-223	CER
RF090	TS-101		TS-227	CER
RF091	TS-102		TS-229	CER
RF093	TS-103		TS-22	PIM
RF094	TS-104		TS-230	CER
RF096	TS-108		TS-231	CER
RF097	TS-110		TS-233	CER
RF102	TS-111		TS-238	CER
RF103	TS-112		TS-23	PIM
RF105	TS-113		TS-240	CER
	TS-114		TS-243	CER
	TS-115		TS-244	PIM
	TS-117		TS-247	CER
	TS-121		TS-248	CER
	TS-122		TS-24	PIM
	TS-125		TS-250	CER
	TS-126		TS-252	CER
	TS-127		TS-254	CER
	TS-128		TS-257	CER
	TS-130		TS-258	CER
	TS-132		TS-25	CER
	TS-133		TS-260	CER
	TS-135		TS-262	CER
	TS-136		TS-265	PIM
	TS-137		TS-266	PIM
	TS-139		TS-26	CER
	TS-140		TS-271	CER
	TS-141		TS-273	CER
	TS-142		TS-27	CER
	TS-143		TS-280	CER
	TS-147		TS-281	CER
	TS-150		TS-283	CER
	TS-151		TS-284	CER
	TS-152		TS-286	CER
	TS-153		TS-287	CER
	TS-155		TS-28	CER
	TS-157		TS-290	CER
	TS-159		TS-291	PIM
	TS-160		TS-294	CER
	TS-161		TS-298	CER
	TS-162		TS-299	CER
	TS-163		TS-29	CER
	TS-166		TS-300	CER
	TS-167		TS-301	CER
	TS-168		TS-302	CER
	TS-169		TS-303	CER
	TS-170		TS-304	CER
	TS-171		TS-30	CER
	TS-172		TS-31	CER
	TS-173		TS-32	CER
	TS-174		TS-33	CER
	TS-175		TS-34	CER
	TS-176		TS-35	CER
	TS-177		TS-36	CER
	TS-178		TS-37	CER
	TS-179		TS-38	CER
	TS-180		TS-39	CER
	TS-183		TS-40	CER
	TS-184		TS-410	PIM
	TS-185		TS-411	PIM
	TS-186		TS-412	PIM
	TS-188		TS-413	PIM
	TS-190		TS-414	PIM
	TS-191		TS-415	PIM
	TS-192		TS-416	PIM
	TS-193		TS-417	PIM
	TS-194		TS-418	PIM
	TS-195		TS-419	PIM
	TS-196		TS-420	PIM
	TS-197		TS-421	PIM
	TS-198		TS-422	PIM
	TS-200		TS-423	CER
	TS-201		TS-424	PIM
	TS-203		TS-425	PIM
	TS-204		TS-426	CER
	TS-206		TS-427	CER
	TS-210		TS-428	CER
	TS-211		TS-429	PIM
	TS-212		TS-430	CER
	TS-214		TS-431	CER
	TS-215		TS-432	PIM
	TS-218		TS-433	PIM
	TS-220		TS-434	PIM
	TS-224		TS-435	PIM
	TS-225		TS-436	CER
	TS-226		TS-437	PIM
	TS-228		TS-438	PIM
	TS-232		TS-439	PIM
	TS-234		TS-440	PIM
	TS-235		TS-441	PIM
	TS-236		TS-50	PIM
	TS-237		TS-53	CER
	TS-239		TS-54	CER
	TS-241		TS-56	CER
	TS-242		TS-57	CER
	TS-245		TS-61	CER
	TS-246		TS-62	CER
	TS-249		TS-63	CER
	TS-251		TS-64	CER
	TS-253		TS-65	CER
	TS-255		TS-66	CER
	TS-256		TS-67	CER
	TS-259		TS-70	CER
	TS-261		TS-71	CER
	TS-263		TS-72	CER
	TS-264		TS-75	CER
	TS-268		TS-77	PIM
	TS-269		TS-79	PIM
	TS-270		TS-84	CER
	TS-272		TS-87	CER
	TS-274		TS-91	CER
	TS-275		TS-92	PIM
	TS-276		TS-94	CER
	TS-277		TS-96	CER
	TS-278		TS-97	CER
	TS-282		TS-98	CER
	TS-285		TS-99	CER
	TS-288
	TS-292
	TS-293
	TS-296
	TS-297
	TS-400
	TS-401
	TS-409
	TS-305
	TS-306
	TS-307
	TS-308
	TS-309
	TS-310
	TS-311
	TS-312
	TS-313
	TS-314
	TS-315
	TS-316
	TS-317
	TS-318
	TS-319
	TS-320
	TS-321

## Sheet: Supplementary Table S2
Supplementary Table S2: Tomato genepool accessions and SNPs metrics
Sample	Species	Sequence reads	AlignedReads	%Aligned	nRefHom	%RefHom	nNonRefHom	%NonRefHom	nHets	%HET	average depth	nMissing	%MISSING
GPT134990	Solanum arcanum	601217	537340	0.8937	5690	0.489	4231	0.364	1704	0.147	45.1	381	0.032
GPT135060	Solanum chmielewskii	571875	517830	0.9054	5737	0.493	4308	0.37	1585	0.136	44.5	376	0.031
GPT134590	Solanum habrochaites	409375	366198	0.8945	5501	0.489	3718	0.331	2023	0.18	35.2	764	0.064
GPT134610	Solanum habrochaites	357890	318364	0.8895	5373	0.48	3852	0.344	1959	0.175	33.9	822	0.068
GPT239410	Solanum habrochaites	380365	343720	0.9036	5342	0.481	3865	0.348	1908	0.172	34.6	891	0.074
GPT134580	Solanum habrochaites	452610	407199	0.8996	5263	0.476	4249	0.384	1555	0.141	36	939	0.078
GPT134790	Solanum habrochaites	390615	351396	0.8995	5138	0.47	4369	0.4	1418	0.13	34.2	1081	0.09
GPT134630	Solanum habrochaites	277119	254479	0.9183	4859	0.446	4526	0.416	1507	0.138	34.5	1114	0.093
GPT134650	Solanum habrochaites	488721	439690	0.8996	4724	0.435	5054	0.465	1094	0.101	38.9	1134	0.094
GPT134570	Solanum habrochaites	269187	244746	0.9092	4556	0.447	4867	0.477	778	0.076	30.9	1805	0.15
GPT134770	Solanum habrochaites	387763	330149	0.8514	4555	0.449	4365	0.43	1225	0.121	32.8	1861	0.155
GPT134600	Solanum habrochaites	324720	295846	0.911	4356	0.441	4651	0.471	871	0.088	31.9	2128	0.177
GPT134970	Solanum huaylasense	424315	381224	0.8984	4964	0.426	3508	0.301	3188	0.273	40	346	0.029
GPT134950	Solanum huaylasense	516626	461701	0.8936	5106	0.439	3723	0.32	2800	0.241	42.8	377	0.031
CTR_H1_122	Solanum lycopersicum	640435	610727	0.9536	11985	0.998	11	0.001	8	0.001	54.6	2	0
CTR_H1_123	Solanum lycopersicum	442002	420405	0.9511	11985	0.999	11	0.001	7	0.001	50	3	0
GPT123540	Solanum lycopersicum	836207	778217	0.9306	11686	0.974	299	0.025	15	0.001	57.7	6	0
GPT123560	Solanum lycopersicum	700847	659256	0.9406	11689	0.974	300	0.025	16	0.001	55.5	1	0
GPT123920	Solanum lycopersicum	803237	755237	0.9402	11709	0.975	280	0.023	17	0.001	57.6	0	0
GPT130120	Solanum lycopersicum	381689	350171	0.9174	11685	0.973	302	0.025	18	0.001	49.4	1	0
GPT133840	Solanum lycopersicum	510615	464636	0.9099	11699	0.975	291	0.024	15	0.001	52.1	1	0
GPT136110	Solanum lycopersicum	1105182	1017711	0.9208	11682	0.973	305	0.025	18	0.001	60.8	1	0
GPT139100	Solanum lycopersicum	748704	707416	0.9448	11680	0.973	308	0.026	18	0.001	56	0	0
GPT142140	Solanum lycopersicum	622338	587320	0.9437	11680	0.973	307	0.026	18	0.001	54.3	1	0
GPT123140	Solanum lycopersicum	715257	661658	0.925	11682	0.973	304	0.025	19	0.002	56	1	0
GPT123160	Solanum lycopersicum	582928	551715	0.9465	11708	0.975	271	0.023	25	0.002	54	2	0
GPT123890	Solanum lycopersicum	675289	626771	0.9281	11688	0.974	289	0.024	26	0.002	55.4	3	0
GPT123930	Solanum lycopersicum	1370889	1293701	0.9436	11612	0.968	366	0.03	23	0.002	62.7	5	0
GPT124170	Solanum lycopersicum	636277	598336	0.9403	11667	0.972	313	0.026	25	0.002	54.6	1	0
GPT124540	Solanum lycopersicum	482394	446845	0.9263	11655	0.971	328	0.027	23	0.002	52.5	0	0
GPT124910	Solanum lycopersicum	248771	223668	0.8991	11635	0.969	341	0.028	29	0.002	37.9	1	0
GPT125000	Solanum lycopersicum	797411	745552	0.935	11672	0.972	304	0.025	30	0.002	55.6	0	0
GPT125020	Solanum lycopersicum	527921	487598	0.9236	11674	0.973	308	0.026	21	0.002	53.6	3	0
GPT125150	Solanum lycopersicum	557605	519254	0.9312	11667	0.972	309	0.026	25	0.002	53.6	5	0
GPT125590	Solanum lycopersicum	533992	507918	0.9511	11680	0.973	305	0.025	20	0.002	54.2	1	0
GPT126470	Solanum lycopersicum	1241674	1174326	0.9457	11709	0.976	271	0.023	23	0.002	62.5	3	0
GPT126770	Solanum lycopersicum	663718	626588	0.9441	11643	0.97	332	0.028	30	0.002	54.4	1	0
GPT129210	Solanum lycopersicum	490684	448100	0.9132	11600	0.966	377	0.031	28	0.002	51.7	1	0
GPT129220	Solanum lycopersicum	396645	371714	0.9371	11599	0.966	380	0.032	26	0.002	50.4	1	0
GPT129740	Solanum lycopersicum	464785	436829	0.9398	11635	0.97	341	0.028	24	0.002	52.4	6	0
GPT129960	Solanum lycopersicum	887029	829026	0.9346	11712	0.976	268	0.022	23	0.002	57.7	3	0
GPT130180	Solanum lycopersicum	626733	550537	0.8784	11674	0.972	302	0.025	29	0.002	53.5	1	0
GPT131410	Solanum lycopersicum	378125	355163	0.9392	11686	0.974	289	0.024	28	0.002	49.6	3	0
GPT131700	Solanum lycopersicum	495642	462914	0.9339	11688	0.974	288	0.024	29	0.002	52.1	1	0
GPT131920	Solanum lycopersicum	470203	437862	0.9312	11683	0.973	291	0.024	30	0.002	51.2	2	0
GPT134050	Solanum lycopersicum	714575	645617	0.9034	11694	0.974	282	0.023	30	0.002	54.8	0	0
GPT135920	Solanum lycopersicum	451767	418014	0.9253	11669	0.972	306	0.025	30	0.002	52	1	0
GPT136090	Solanum lycopersicum	538201	492537	0.9152	11700	0.975	279	0.023	27	0.002	51	0	0
GPT136140	Solanum lycopersicum	365493	329544	0.9016	11679	0.973	305	0.025	22	0.002	47.7	0	0
GPT136180	Solanum lycopersicum	393415	360261	0.9157	11645	0.97	341	0.028	20	0.002	48.5	0	0
GPT136220	Solanum lycopersicum	520539	474985	0.9125	11721	0.977	258	0.021	24	0.002	52.8	3	0
GPT136230	Solanum lycopersicum	772289	723595	0.9369	11682	0.973	305	0.025	19	0.002	57.4	0	0
GPT136820	Solanum lycopersicum	595753	555059	0.9317	11667	0.972	305	0.025	30	0.002	53.6	4	0
GPT137220	Solanum lycopersicum	774791	727745	0.9393	11669	0.972	307	0.026	30	0.002	55.1	0	0
GPT137230	Solanum lycopersicum	585549	547098	0.9343	11677	0.973	304	0.025	24	0.002	54.8	1	0
GPT137360	Solanum lycopersicum	390489	355157	0.9095	11680	0.973	306	0.025	19	0.002	48.8	1	0
GPT137420	Solanum lycopersicum	732824	661272	0.9024	11717	0.976	261	0.022	28	0.002	54.7	0	0
GPT137580	Solanum lycopersicum	622553	576962	0.9267	11689	0.974	294	0.024	23	0.002	55	0	0
GPT137970	Solanum lycopersicum	614224	569982	0.928	11665	0.972	308	0.026	30	0.002	54	3	0
GPT138170	Solanum lycopersicum	445506	409935	0.9202	11656	0.971	319	0.027	30	0.002	51.8	1	0
GPT138280	Solanum lycopersicum	549882	508003	0.9238	11670	0.972	307	0.026	29	0.002	52.9	0	0
GPT138580	Solanum lycopersicum	590731	553511	0.9369	11684	0.973	298	0.025	24	0.002	54.8	0	0
GPT139730	Solanum lycopersicum	569751	537682	0.9437	11698	0.975	276	0.023	30	0.002	53.6	2	0
GPT139760	Solanum lycopersicum	559291	520429	0.9305	11710	0.975	277	0.023	19	0.002	53.3	0	0
GPT141210	Solanum lycopersicum	612575	576365	0.9408	11654	0.971	321	0.027	29	0.002	55.1	2	0
GPT141220	Solanum lycopersicum	337307	315371	0.9349	11710	0.975	272	0.023	24	0.002	47.7	0	0
GPT141320	Solanum lycopersicum	396222	367754	0.9281	11681	0.973	294	0.024	28	0.002	50.4	3	0
GPT141420	Solanum lycopersicum	432504	405915	0.9385	11693	0.974	283	0.024	30	0.002	51.7	0	0
GPT141460	Solanum lycopersicum	288744	270758	0.9377	11686	0.974	289	0.024	27	0.002	44	4	0
GPT141670	Solanum lycopersicum	612109	566249	0.925	11726	0.977	253	0.021	26	0.002	53.9	1	0
GPT141680	Solanum lycopersicum	685287	625951	0.9134	11705	0.975	276	0.023	24	0.002	54.9	1	0
GPT141720	Solanum lycopersicum	488949	446366	0.9129	11657	0.971	324	0.027	25	0.002	51	0	0
GPT141730	Solanum lycopersicum	639329	602991	0.9431	11672	0.972	305	0.025	29	0.002	54.5	0	0
GPT141740	Solanum lycopersicum	575217	539189	0.9373	11686	0.973	295	0.025	25	0.002	53.4	0	0
GPT141790	Solanum lycopersicum	600595	543985	0.9057	11727	0.977	257	0.021	21	0.002	53.5	1	0
GPT142150	Solanum lycopersicum	568663	538034	0.9461	11656	0.971	320	0.027	29	0.002	53.5	1	0
GPT142170	Solanum lycopersicum	571011	533227	0.9338	11663	0.971	318	0.026	25	0.002	53.3	0	0
GPT123460	Solanum lycopersicum	587635	556380	0.9468	11795	0.982	172	0.014	39	0.003	53.7	0	0
GPT123880	Solanum lycopersicum	588132	559929	0.952	11664	0.972	309	0.026	33	0.003	54	0	0
GPT123910	Solanum lycopersicum	251451	238830	0.9498	11571	0.964	393	0.033	39	0.003	40.2	3	0
GPT123960	Solanum lycopersicum	618721	577574	0.9335	11650	0.97	324	0.027	31	0.003	51.7	1	0
GPT124000	Solanum lycopersicum	664344	601091	0.9047	11658	0.971	312	0.026	33	0.003	54.7	3	0
GPT124030	Solanum lycopersicum	447226	422591	0.9449	11686	0.974	279	0.023	39	0.003	50	2	0
GPT124080	Solanum lycopersicum	619842	590509	0.9526	11639	0.97	325	0.027	40	0.003	55.5	2	0
GPT124190	Solanum lycopersicum	430160	408703	0.9501	11688	0.974	285	0.024	33	0.003	51.9	0	0
GPT124460	Solanum lycopersicum	496702	474551	0.9554	11642	0.97	331	0.028	31	0.003	52.9	2	0
GPT124940	Solanum lycopersicum	656199	599427	0.9134	11684	0.973	289	0.024	32	0.003	54	1	0
GPT125040	Solanum lycopersicum	460019	422566	0.9185	11682	0.973	282	0.023	41	0.003	50.9	1	0
GPT125120	Solanum lycopersicum	267499	246443	0.9213	11672	0.972	294	0.024	39	0.003	42.1	1	0
GPT125200	Solanum lycopersicum	299754	265312	0.885	11666	0.972	294	0.024	41	0.003	42.8	5	0
GPT125650	Solanum lycopersicum	373330	330865	0.8862	11784	0.982	186	0.015	34	0.003	48	2	0
GPT127250	Solanum lycopersicum	322117	291873	0.9061	11669	0.972	295	0.025	42	0.003	44.7	0	0
GPT127580	Solanum lycopersicum	514370	480276	0.9337	11625	0.968	345	0.029	34	0.003	53	2	0
GPT128080	Solanum lycopersicum	661732	626328	0.9464	11647	0.97	322	0.027	36	0.003	55.8	1	0
GPT129230	Solanum lycopersicum	573740	528061	0.9204	11586	0.965	376	0.031	41	0.003	51.2	3	0
GPT129950	Solanum lycopersicum	594644	566261	0.9523	11628	0.969	338	0.028	34	0.003	51.7	6	0
GPT129980	Solanum lycopersicum	806049	772278	0.9581	11664	0.972	310	0.026	32	0.003	55.5	0	0
GPT130200	Solanum lycopersicum	432698	393784	0.9101	11667	0.972	304	0.025	35	0.003	49.4	0	0
GPT130380	Solanum lycopersicum	818437	760213	0.9288	11649	0.971	311	0.026	41	0.003	57.3	5	0
GPT130510	Solanum lycopersicum	410403	386199	0.941	11623	0.968	346	0.029	35	0.003	49.3	2	0
GPT131520	Solanum lycopersicum	854180	756698	0.8859	11625	0.969	337	0.028	40	0.003	55.2	4	0
GPT131690	Solanum lycopersicum	546198	513507	0.9401	11672	0.972	299	0.025	35	0.003	53.3	0	0
GPT135700	Solanum lycopersicum	405124	373072	0.9209	11578	0.965	390	0.032	34	0.003	50.9	4	0
GPT135760	Solanum lycopersicum	322331	298490	0.926	11664	0.972	299	0.025	39	0.003	45.5	4	0
GPT135910	Solanum lycopersicum	539210	506705	0.9397	11670	0.972	304	0.025	32	0.003	51.2	0	0
GPT135980	Solanum lycopersicum	573883	530978	0.9252	11594	0.966	370	0.031	38	0.003	53.7	4	0
GPT136120	Solanum lycopersicum	791171	723435	0.9144	11643	0.97	327	0.027	34	0.003	54.9	2	0
GPT136210	Solanum lycopersicum	804522	713925	0.8873	11674	0.973	299	0.025	31	0.003	56.2	2	0
GPT136750	Solanum lycopersicum	245633	229342	0.9337	11664	0.972	304	0.025	36	0.003	39.7	2	0
GPT136780	Solanum lycopersicum	448760	410960	0.9158	11665	0.972	300	0.025	39	0.003	51.8	2	0
GPT136790	Solanum lycopersicum	428625	390849	0.9119	11678	0.973	288	0.024	38	0.003	51.4	2	0
GPT136940	Solanum lycopersicum	785646	726642	0.9248	11626	0.969	344	0.029	34	0.003	56.7	2	0
GPT137180	Solanum lycopersicum	414003	371819	0.8981	11642	0.97	328	0.027	36	0.003	50.2	0	0
GPT137190	Solanum lycopersicum	559152	526539	0.9416	11670	0.972	303	0.025	33	0.003	54.4	0	0
GPT137240	Solanum lycopersicum	795400	730531	0.9184	11666	0.972	307	0.026	33	0.003	55.1	0	0
GPT137280	Solanum lycopersicum	770001	718098	0.9326	11622	0.968	348	0.029	36	0.003	55.1	0	0
GPT137310	Solanum lycopersicum	603708	563734	0.9338	11679	0.973	289	0.024	36	0.003	53.8	2	0
GPT137340	Solanum lycopersicum	619669	585570	0.945	11667	0.972	299	0.025	37	0.003	54	3	0
GPT137350	Solanum lycopersicum	621766	577001	0.928	11669	0.972	304	0.025	32	0.003	53.8	1	0
GPT137990	Solanum lycopersicum	704557	650667	0.9235	11688	0.974	287	0.024	31	0.003	54.7	0	0
GPT138270	Solanum lycopersicum	311281	289983	0.9315	11670	0.972	295	0.025	41	0.003	45.9	0	0
GPT138750	Solanum lycopersicum	508837	469099	0.9219	11676	0.973	295	0.025	35	0.003	52.9	0	0
GPT138960	Solanum lycopersicum	641060	596373	0.9303	11661	0.972	302	0.025	39	0.003	54.2	4	0
GPT139020	Solanum lycopersicum	605187	571460	0.9443	11669	0.972	305	0.025	32	0.003	54.1	0	0
GPT139050	Solanum lycopersicum	507602	471470	0.9288	11615	0.967	352	0.029	39	0.003	52.9	0	0
GPT139060	Solanum lycopersicum	529727	500980	0.9457	11691	0.974	275	0.023	38	0.003	53.4	2	0
GPT140100	Solanum lycopersicum	553729	516546	0.9328	11671	0.972	301	0.025	34	0.003	53.3	0	0
GPT140110	Solanum lycopersicum	628812	588235	0.9355	11662	0.972	304	0.025	34	0.003	54.3	6	0
GPT140260	Solanum lycopersicum	452708	427028	0.9432	11686	0.973	283	0.024	37	0.003	52.2	0	0
GPT140600	Solanum lycopersicum	661879	622198	0.94	11670	0.972	303	0.025	32	0.003	55.9	1	0
GPT140970	Solanum lycopersicum	379732	347917	0.9162	11666	0.972	295	0.025	42	0.003	49.4	3	0
GPT141300	Solanum lycopersicum	639239	598420	0.9361	11661	0.972	301	0.025	39	0.003	55.4	5	0
GPT141310	Solanum lycopersicum	484897	453636	0.9355	11663	0.972	301	0.025	41	0.003	52.9	1	0
GPT141780	Solanum lycopersicum	683180	625104	0.9149	11674	0.973	293	0.024	37	0.003	54.6	2	0
GPT142180	Solanum lycopersicum	327440	310668	0.9487	11680	0.973	295	0.025	31	0.003	47	0	0
GPT142190	Solanum lycopersicum	534436	500152	0.9358	11672	0.972	300	0.025	34	0.003	52.7	0	0
GPT142510	Solanum lycopersicum	691582	627110	0.9067	11705	0.975	262	0.022	38	0.003	54.8	1	0
GPT144610	Solanum lycopersicum	320881	287557	0.8961	11668	0.972	296	0.025	42	0.003	45.4	0	0
GPT123570	Solanum lycopersicum	536316	498359	0.9292	11600	0.966	358	0.03	46	0.004	52.6	2	0
GPT124800	Solanum lycopersicum	533131	485689	0.911	11692	0.974	270	0.022	44	0.004	53.6	0	0
GPT126700	Solanum lycopersicum	334115	299543	0.8965	11630	0.969	328	0.027	44	0.004	45.5	4	0
GPT128960	Solanum lycopersicum	539478	500612	0.928	11480	0.956	476	0.04	50	0.004	53.1	0	0
GPT129930	Solanum lycopersicum	511607	464764	0.9084	11543	0.962	411	0.034	47	0.004	52.1	5	0
GPT130070	Solanum lycopersicum	327160	299338	0.9149	11644	0.97	313	0.026	48	0.004	46.6	1	0
GPT130620	Solanum lycopersicum	710560	652858	0.9187	11669	0.972	293	0.024	44	0.004	55.8	0	0
GPT130850	Solanum lycopersicum	535207	501710	0.9374	11527	0.96	432	0.036	44	0.004	53.8	3	0
GPT130870	Solanum lycopersicum	493820	466925	0.9455	11671	0.972	290	0.024	45	0.004	52	0	0
GPT131560	Solanum lycopersicum	517836	489835	0.9459	11634	0.969	317	0.026	53	0.004	53.7	2	0
GPT135890	Solanum lycopersicum	272325	255030	0.9364	11667	0.972	283	0.024	54	0.004	43.1	2	0
GPT136150	Solanum lycopersicum	380492	343665	0.9032	11667	0.972	287	0.024	51	0.004	49.1	1	0
GPT136190	Solanum lycopersicum	418141	393660	0.9415	11541	0.962	415	0.035	46	0.004	49.5	4	0
GPT136260	Solanum lycopersicum	289564	270518	0.9342	11683	0.973	271	0.023	52	0.004	43.6	0	0
GPT136660	Solanum lycopersicum	586516	533600	0.9097	11684	0.973	277	0.023	44	0.004	53.3	1	0
GPT137330	Solanum lycopersicum	499746	468238	0.937	11444	0.953	514	0.043	45	0.004	52.5	3	0
GPT137480	Solanum lycopersicum	509016	468615	0.9206	11671	0.973	286	0.024	43	0.004	51.9	6	0
GPT139160	Solanum lycopersicum	569686	541922	0.9513	11651	0.97	312	0.026	43	0.004	53.7	0	0
GPT140130	Solanum lycopersicum	427299	402010	0.9408	11502	0.958	451	0.038	53	0.004	51.7	0	0
GPT140620	Solanum lycopersicum	346156	323311	0.934	11685	0.973	272	0.023	47	0.004	48	2	0
GPT140910	Solanum lycopersicum	402743	375290	0.9318	11684	0.973	277	0.023	44	0.004	50.6	1	0
GPT130460	Solanum lycopersicum	505550	460489	0.9108	11663	0.972	283	0.024	58	0.005	52.3	2	0
GPT130800	Solanum lycopersicum	279524	263240	0.9417	11701	0.975	241	0.02	61	0.005	43.4	3	0
GPT137290	Solanum lycopersicum	635518	583560	0.9182	11595	0.966	345	0.029	63	0.005	54.7	3	0
GPT139010	Solanum lycopersicum	512782	472651	0.9217	11648	0.97	300	0.025	56	0.005	51.9	2	0
GPT140580	Solanum lycopersicum	686465	645954	0.9409	11557	0.963	385	0.032	61	0.005	56.3	3	0
GPT123000	Solanum lycopersicum	1170775	1072948	0.9164	11667	0.972	262	0.022	75	0.006	58.2	2	0
GPT124440	Solanum lycopersicum	530241	496682	0.9367	11610	0.967	323	0.027	73	0.006	50.7	0	0
GPT124930	Solanum lycopersicum	504794	465916	0.923	11630	0.969	298	0.025	77	0.006	52.7	1	0
GPT126360	Solanum lycopersicum	506843	447011	0.882	11632	0.969	298	0.025	76	0.006	50.2	0	0
GPT135970	Solanum lycopersicum	268908	246223	0.9156	11651	0.971	277	0.023	76	0.006	41.7	2	0
GPT137880	Solanum lycopersicum	687845	617530	0.8978	11639	0.97	289	0.024	74	0.006	52.1	4	0
GPT137920	Solanum lycopersicum	456087	417398	0.9152	11639	0.97	294	0.024	71	0.006	50	2	0
GPT138480	Solanum lycopersicum	1026813	978729	0.9532	11588	0.966	345	0.029	69	0.006	55	4	0
GPT139270	Solanum lycopersicum	368104	346319	0.9408	11555	0.963	382	0.032	68	0.006	50	1	0
GPT126540	Solanum lycopersicum	421869	387803	0.9192	11623	0.968	302	0.025	81	0.007	51.4	0	0
GPT130090	Solanum lycopersicum	375096	353370	0.942	11627	0.969	299	0.025	79	0.007	49.8	1	0
GPT137260	Solanum lycopersicum	423171	387629	0.916	11682	0.973	237	0.02	84	0.007	50.9	3	0
GPT138140	Solanum lycopersicum	682387	636448	0.9327	11607	0.967	309	0.026	89	0.007	54.6	1	0
GPT139720	Solanum lycopersicum	625744	580178	0.9271	11616	0.968	303	0.025	85	0.007	54.6	2	0
GPT132800	Solanum lycopersicum	558714	503171	0.9006	11658	0.971	253	0.021	94	0.008	51	1	0
GPT137600	Solanum lycopersicum	487925	440925	0.9036	11634	0.969	278	0.023	92	0.008	51.6	2	0
GPT139170	Solanum lycopersicum	530678	505002	0.9516	11422	0.952	488	0.041	90	0.008	53.2	6	0
GPT140680	Solanum lycopersicum	502401	457306	0.9102	11668	0.972	247	0.021	91	0.008	52.3	0	0
GPT141290	Solanum lycopersicum	538255	507085	0.942	11519	0.96	391	0.033	90	0.008	53.4	6	0
GPT142330	Solanum lycopersicum	542624	510083	0.94	11644	0.97	265	0.022	96	0.008	53.6	1	0
GPT144630	Solanum lycopersicum	291969	258150	0.8841	11587	0.965	318	0.026	99	0.008	42.3	2	0
GPT139210	Solanum lycopersicum	557542	528306	0.9476	11507	0.959	390	0.032	106	0.009	51.3	3	0
GPT142560	Solanum lycopersicum	550208	506233	0.92	11662	0.972	238	0.02	104	0.009	52.6	2	0
GPT128910	Solanum lycopersicum	565200	535467	0.9473	11619	0.968	254	0.021	127	0.011	54	6	0
GPT139190	Solanum lycopersicum	462252	435889	0.943	11436	0.953	431	0.036	137	0.011	50.2	2	0
GPT126370	Solanum lycopersicum	341088	314379	0.9217	11546	0.962	301	0.025	159	0.013	46.6	0	0
GPT137710	Solanum lycopersicum	694167	630249	0.9079	11576	0.964	278	0.023	151	0.013	54.5	1	0
GPT139550	Solanum lycopersicum	605114	559874	0.9252	11542	0.962	283	0.024	175	0.015	53.6	6	0
GPT130540	Solanum lycopersicum	779267	735022	0.9432	11595	0.966	201	0.017	210	0.017	56.5	0	0
GPT138230	Solanum lycopersicum	329360	298372	0.9059	11540	0.961	233	0.019	231	0.019	46	2	0
GPT137380	Solanum lycopersicum	390716	366802	0.9388	11323	0.943	196	0.016	485	0.04	50.7	2	0
GPT143710	Solanum lycopersicum	344607	304397	0.8833	11145	0.929	120	0.01	738	0.061	45.1	3	0
GPT123670	Solanum lycopersicum	595895	563648	0.9459	11586	0.966	377	0.031	33	0.003	51.6	10	0.001
GPT142390	Solanum lycopersicum	586485	543646	0.9269	11517	0.96	441	0.037	41	0.003	53.2	7	0.001
GPT124640	Solanum lycopersicum	331275	300469	0.907	11624	0.969	322	0.027	51	0.004	46.4	9	0.001
GPT131790	Solanum lycopersicum	324895	292004	0.8987	11635	0.97	315	0.026	49	0.004	45	7	0.001
GPT138510	Solanum lycopersicum	754636	682288	0.9041	11551	0.963	400	0.033	47	0.004	56	8	0.001
GPT138660	Solanum lycopersicum	453204	423559	0.9346	11535	0.962	409	0.034	46	0.004	52	16	0.001
GPT126750	Solanum lycopersicum	378895	347550	0.9172	11637	0.97	303	0.025	59	0.005	48.6	7	0.001
GPT141980	Solanum lycopersicum	336644	317945	0.9444	11534	0.962	395	0.033	64	0.005	47	13	0.001
GPT124490	Solanum lycopersicum	488542	458237	0.9379	11599	0.967	287	0.024	113	0.009	51.8	7	0.001
GPT239390	Solanum lycopersicum	486356	457292	0.9402	11238	0.937	632	0.053	123	0.01	52.3	13	0.001
GPT125220	Solanum lycopersicum	377945	346073	0.9156	11421	0.952	424	0.035	153	0.013	49.2	8	0.001
GPT141820	Solanum lycopersicum	557802	524413	0.9401	11314	0.943	474	0.04	210	0.018	53.1	8	0.001
GPT124380	Solanum lycopersicum	167523	153500	0.9162	11345	0.946	424	0.035	222	0.019	28	15	0.001
GPT129070	Solanum lycopersicum	580908	519131	0.8936	11277	0.94	473	0.039	244	0.02	52.5	12	0.001
GPT139000	Solanum lycopersicum	381762	360418	0.944	10184	0.849	1238	0.103	572	0.048	48.3	12	0.001
GPT125960	Solanum lycopersicum	537660	506831	0.9426	11358	0.948	354	0.03	266	0.022	52.3	28	0.002
GPT131770	Solanum lycopersicum	488905	456210	0.9331	10929	0.912	706	0.059	350	0.029	52.2	21	0.002
GPT129510	Solanum lycopersicum	598316	559603	0.9352	10946	0.913	655	0.055	386	0.032	53.7	19	0.002
GPT239380	Solanum lycopersicum	379246	352792	0.9302	11225	0.938	655	0.055	81	0.007	49.2	45	0.004
GPT140760	Solanum lycopersicum	505959	452210	0.8937	11427	0.971	319	0.027	27	0.002	52.3	233	0.019
GPT122960	Solanum lycopersicum	1072027	987324	0.9209	11436	0.971	306	0.026	30	0.003	57.1	234	0.019
GPT123380	Solanum lycopersicum	474666	448275	0.9444	11427	0.971	308	0.026	37	0.003	52.5	234	0.019
GPT123510	Solanum lycopersicum	603495	559203	0.9266	11408	0.969	330	0.028	34	0.003	53.9	234	0.019
GPT124240	Solanum lycopersicum	521125	478345	0.9179	11442	0.972	295	0.025	36	0.003	53	233	0.019
GPT126500	Solanum lycopersicum	759808	706474	0.9298	11296	0.96	440	0.037	36	0.003	55.4	234	0.019
GPT141430	Solanum lycopersicum	436488	409664	0.9385	11440	0.972	291	0.025	41	0.003	51.9	234	0.019
GPT144140	Solanum lycopersicum	549908	503694	0.9159	11390	0.967	342	0.029	41	0.003	53.3	233	0.019
GPT124360	Solanum lycopersicum	365381	342925	0.9385	11359	0.965	362	0.031	51	0.004	50	234	0.019
GPT125320	Solanum lycopersicum	469330	443792	0.9455	11453	0.973	276	0.023	43	0.004	52.4	234	0.019
GPT129410	Solanum lycopersicum	483693	454994	0.9406	11328	0.962	398	0.034	46	0.004	52.7	234	0.019
GPT130630	Solanum lycopersicum	566117	508696	0.8985	11459	0.973	270	0.023	43	0.004	53.5	234	0.019
GPT131370	Solanum lycopersicum	652056	609963	0.9354	11419	0.97	304	0.026	49	0.004	54.5	234	0.019
GPT133330	Solanum lycopersicum	425044	387376	0.9113	11447	0.972	273	0.023	52	0.004	51.5	234	0.019
GPT134420	Solanum lycopersicum	413792	362346	0.8756	11418	0.97	307	0.026	47	0.004	50.1	234	0.019
GPT141010	Solanum lycopersicum	363370	340072	0.9358	11426	0.971	301	0.026	45	0.004	49.8	234	0.019
GPT144900	Solanum lycopersicum	332414	290568	0.8741	11429	0.971	299	0.025	45	0.004	45.5	233	0.019
GPT141570	Solanum lycopersicum	459562	427639	0.9305	11426	0.971	290	0.025	56	0.005	52.1	234	0.019
GPT142590	Solanum lycopersicum	458865	416570	0.9078	11408	0.969	307	0.026	58	0.005	51.8	233	0.019
GPT143110	Solanum lycopersicum	301887	274368	0.9088	11419	0.97	278	0.024	76	0.006	44.5	233	0.019
GPT143630	Solanum lycopersicum	322107	293032	0.9097	11383	0.967	317	0.027	72	0.006	46.5	234	0.019
GPT144110	Solanum lycopersicum	541297	504121	0.9313	11350	0.964	354	0.03	68	0.006	53.4	234	0.019
GPT134540	Solanum lycopersicum	448959	397962	0.8864	11412	0.969	257	0.022	104	0.009	51.3	233	0.019
GPT131850	Solanum lycopersicum	704863	645060	0.9151	11397	0.968	243	0.021	133	0.011	54.7	233	0.019
GPT142570	Solanum lycopersicum	333127	305789	0.9179	11378	0.967	234	0.02	160	0.014	47.5	234	0.019
GPT136020	Solanum lycopersicum	553563	486059	0.878	11330	0.962	208	0.018	235	0.02	52.7	233	0.019
GPT144060	Solanum lycopersicum	459513	415167	0.9034	11300	0.96	231	0.02	241	0.02	51.8	234	0.019
GPT141140	Solanum lycopersicum	333680	314678	0.943	11283	0.958	227	0.019	263	0.022	48.4	233	0.019
GPT134270	Solanum lycopersicum	702495	614510	0.8747	11298	0.96	190	0.016	285	0.024	53.9	233	0.019
GPT138830	Solanum lycopersicum	540807	505440	0.9346	11478	0.975	267	0.023	25	0.002	53.4	236	0.02
GPT130400	Solanum lycopersicum	620026	573984	0.9257	11437	0.972	298	0.025	34	0.003	54.1	237	0.02
GPT133900	Solanum lycopersicum	499707	469322	0.9391	11434	0.972	299	0.025	35	0.003	52.9	238	0.02
GPT138330	Solanum lycopersicum	832734	761862	0.9148	11423	0.971	310	0.026	36	0.003	55.4	237	0.02
GPT139090	Solanum lycopersicum	438805	409141	0.9323	11297	0.96	433	0.037	39	0.003	51.7	237	0.02
GPT144120	Solanum lycopersicum	717443	652195	0.909	11296	0.96	433	0.037	40	0.003	54.7	237	0.02
GPT144920	Solanum lycopersicum	555494	520594	0.9371	11411	0.969	326	0.028	33	0.003	53.6	236	0.02
GPT123010	Solanum lycopersicum	611653	558760	0.9135	11539	0.98	185	0.016	47	0.004	53.9	235	0.02
GPT124990	Solanum lycopersicum	400524	372653	0.9304	11436	0.972	293	0.025	42	0.004	50.9	235	0.02
GPT125080	Solanum lycopersicum	373146	350624	0.9396	11343	0.964	384	0.033	42	0.004	49.9	237	0.02
GPT132340	Solanum lycopersicum	657872	628197	0.9548	11535	0.98	192	0.016	44	0.004	54.7	235	0.02
GPT133890	Solanum lycopersicum	540479	508529	0.9408	11427	0.971	293	0.025	49	0.004	53.2	237	0.02
GPT144540	Solanum lycopersicum	498482	454516	0.9118	11403	0.969	314	0.027	49	0.004	52.6	240	0.02
GPT140230	Solanum lycopersicum	364400	339026	0.9303	11421	0.97	296	0.025	53	0.005	49.6	236	0.02
GPT141230	Solanum lycopersicum	383620	357746	0.9325	11401	0.969	311	0.026	57	0.005	50.5	237	0.02
GPT141560	Solanum lycopersicum	381677	352556	0.9237	11398	0.968	313	0.027	60	0.005	50.1	235	0.02
GPT131510	Solanum lycopersicum	419881	390281	0.9295	11377	0.967	313	0.027	76	0.006	51.4	240	0.02
GPT141000	Solanum lycopersicum	463697	429038	0.9252	11330	0.963	359	0.031	78	0.007	52	239	0.02
GPT143020	Solanum lycopersicum	620352	546568	0.881	11167	0.949	517	0.044	81	0.007	53.6	241	0.02
GPT124970	Solanum lycopersicum	542562	497749	0.9174	11137	0.947	520	0.044	105	0.009	53	244	0.02
GPT125070	Solanum lycopersicum	502562	467209	0.9296	11279	0.958	369	0.031	121	0.01	52.7	237	0.02
GPT126440	Solanum lycopersicum	349810	315858	0.9029	11326	0.962	324	0.028	120	0.01	47.7	236	0.02
GPT130360	Solanum lycopersicum	433473	395635	0.9127	11364	0.966	267	0.023	138	0.012	51.7	237	0.02
GPT133220	Solanum lycopersicum	402310	373926	0.9294	11343	0.964	264	0.022	164	0.014	50.7	235	0.02
GPT143990	Solanum lycopersicum	540184	478230	0.8853	11347	0.964	261	0.022	162	0.014	52.8	236	0.02
GPT136470	Solanum lycopersicum	360604	339424	0.9412	11237	0.955	324	0.028	210	0.018	49.8	235	0.02
GPT124420	Solanum lycopersicum	540981	501374	0.9267	10854	0.923	634	0.054	275	0.023	53	243	0.02
GPT124390	Solanum lycopersicum	423570	393842	0.9298	11100	0.944	375	0.032	285	0.024	51.4	246	0.02
GPT134300	Solanum lycopersicum	276644	244199	0.8827	11023	0.937	425	0.036	320	0.027	40.6	238	0.02
GPT144860	Solanum lycopersicum	381111	357264	0.9374	11025	0.937	331	0.028	410	0.035	50.3	240	0.02
GPT133660	Solanum lycopersicum	291736	257190	0.8815	10734	0.912	520	0.044	510	0.043	42	242	0.02
GPT124400	Solanum lycopersicum	488654	454571	0.9302	10294	0.876	1253	0.107	207	0.018	52	252	0.021
GPT134520	Solanum lycopersicum	727518	673555	0.9258	11386	0.97	325	0.028	26	0.002	54.4	269	0.022
GPT142660	Solanum lycopersicum	571930	526347	0.9202	11394	0.971	318	0.027	26	0.002	53.2	268	0.022
GPT143700	Solanum lycopersicum	515039	470587	0.9136	11414	0.972	301	0.026	23	0.002	52.8	268	0.022
GPT143800	Solanum lycopersicum	601870	545406	0.9061	11440	0.975	273	0.023	24	0.002	53.5	269	0.022
GPT140940	Solanum lycopersicum	582091	514501	0.8838	11403	0.972	304	0.026	30	0.003	53	269	0.022
GPT143570	Solanum lycopersicum	275533	244268	0.8865	11422	0.973	276	0.024	39	0.003	40.3	269	0.022
GPT143610	Solanum lycopersicum	773880	685151	0.8853	11368	0.969	330	0.028	38	0.003	54.3	270	0.022
GPT143850	Solanum lycopersicum	650331	597369	0.9185	11394	0.971	310	0.026	32	0.003	54	270	0.022
GPT142800	Solanum lycopersicum	593827	555835	0.936	11377	0.969	318	0.027	43	0.004	53.6	268	0.022
GPT143280	Solanum lycopersicum	353461	317843	0.8992	11240	0.958	446	0.038	50	0.004	47.9	270	0.022
GPT143350	Solanum lycopersicum	698520	614715	0.88	11373	0.969	321	0.027	44	0.004	53.9	268	0.022
GPT143580	Solanum lycopersicum	711065	639710	0.8996	11414	0.972	282	0.024	42	0.004	54.3	268	0.022
GPT143870	Solanum lycopersicum	383331	338803	0.8838	11411	0.972	285	0.024	42	0.004	49	268	0.022
GPT128480	Solanum lycopersicum	258170	236194	0.9148	11319	0.964	347	0.03	72	0.006	39.8	268	0.022
GPT143730	Solanum lycopersicum	418278	364812	0.8721	11416	0.973	236	0.02	86	0.007	49.6	268	0.022
GPT128500	Solanum lycopersicum	570475	505557	0.8862	11214	0.955	431	0.037	92	0.008	52.8	269	0.022
GPT143520	Solanum lycopersicum	571036	491609	0.8609	11349	0.967	296	0.025	91	0.008	52.6	270	0.022
GPT143590	Solanum lycopersicum	399695	358734	0.8975	11356	0.967	288	0.025	94	0.008	49.7	268	0.022
GPT143690	Solanum lycopersicum	569735	509152	0.8936	11319	0.964	321	0.027	98	0.008	52.9	268	0.022
GPT143720	Solanum lycopersicum	423263	372560	0.8802	11323	0.965	209	0.018	205	0.017	50.1	269	0.022
GPT143820	Solanum lycopersicum	428961	389048	0.9069	11310	0.964	222	0.019	204	0.017	51	270	0.022
GPT143920	Solanum lycopersicum	492558	451314	0.9162	9131	0.778	2271	0.193	339	0.029	51.6	265	0.022
GPT125480	Solanum lycopersicum	687966	632597	0.9195	11395	0.971	308	0.026	32	0.003	54.1	271	0.023
GPT131800	Solanum lycopersicum	588024	521940	0.8876	11258	0.96	415	0.035	59	0.005	53	274	0.023
GPT133960	Solanum lycopersicum	433682	407312	0.9391	11365	0.969	308	0.026	54	0.005	51.7	279	0.023
GPT143010	Solanum lycopersicum	597162	546327	0.9148	11026	0.94	619	0.053	79	0.007	53.4	282	0.023
GPT143740	Solanum lycopersicum	274237	244721	0.8923	11140	0.95	288	0.025	296	0.025	40.4	282	0.023
GPT144980	Solanum lycopersicum	571807	506421	0.8856	9954	0.85	1311	0.112	451	0.038	52.2	290	0.024
GPT142350	Solanum lycopersicum	746758	698015	0.9347	11352	0.973	290	0.025	25	0.002	55.1	339	0.028
GPT124370	Solanum lycopersicum	536680	502805	0.9368	11351	0.973	278	0.024	37	0.003	53.2	340	0.028
GPT125640	Solanum lycopersicum	816517	768376	0.941	11308	0.969	320	0.027	39	0.003	55.9	339	0.028
GPT129730	Solanum lycopersicum	608077	577476	0.9496	11331	0.971	304	0.026	30	0.003	54.2	341	0.028
GPT130130	Solanum lycopersicum	496519	463897	0.9342	11348	0.973	279	0.024	40	0.003	52.8	339	0.028
GPT130140	Solanum lycopersicum	474969	442249	0.9311	11332	0.971	300	0.026	35	0.003	52.6	339	0.028
GPT131180	Solanum lycopersicum	617699	579973	0.9389	11403	0.977	231	0.02	32	0.003	54.3	340	0.028
GPT131190	Solanum lycopersicum	537336	510683	0.9503	11335	0.972	295	0.025	36	0.003	53.7	340	0.028
GPT132900	Solanum lycopersicum	635511	597980	0.9409	11335	0.972	300	0.026	32	0.003	54.4	339	0.028
GPT137850	Solanum lycopersicum	606314	560226	0.9239	11331	0.971	300	0.026	36	0.003	53.8	339	0.028
GPT138530	Solanum lycopersicum	669050	635720	0.9501	11330	0.971	303	0.026	33	0.003	54.7	340	0.028
GPT142310	Solanum lycopersicum	632046	599213	0.948	11329	0.971	303	0.026	35	0.003	54.5	339	0.028
GPT143780	Solanum lycopersicum	559942	508397	0.9079	11328	0.971	303	0.026	35	0.003	53.2	340	0.028
GPT144170	Solanum lycopersicum	589128	542910	0.9215	11311	0.969	324	0.028	32	0.003	53.7	339	0.028
GPT144190	Solanum lycopersicum	732563	647997	0.8845	11329	0.971	305	0.026	33	0.003	54.5	339	0.028
GPT144270	Solanum lycopersicum	679643	602508	0.8865	11319	0.97	315	0.027	33	0.003	53.9	339	0.028
GPT144340	Solanum lycopersicum	568801	509597	0.8959	11339	0.972	288	0.025	40	0.003	53.1	339	0.028
GPT127870	Solanum lycopersicum	708476	662325	0.9348	11260	0.965	355	0.03	52	0.004	54.8	339	0.028
GPT134120	Solanum lycopersicum	737427	706788	0.9584	11297	0.968	320	0.027	48	0.004	55	341	0.028
GPT135220	Solanum lycopersicum	724297	677209	0.9349	11292	0.968	330	0.028	44	0.004	55	340	0.028
GPT139810	Solanum lycopersicum	897277	850437	0.9477	11322	0.971	302	0.026	42	0.004	56.5	340	0.028
GPT139980	Solanum lycopersicum	524065	487947	0.931	11326	0.971	294	0.025	47	0.004	53.2	339	0.028
GPT142230	Solanum lycopersicum	542708	508566	0.937	11333	0.972	282	0.024	49	0.004	53.4	342	0.028
GPT142250	Solanum lycopersicum	633619	598381	0.9443	11020	0.945	593	0.051	52	0.004	54.2	341	0.028
GPT144050	Solanum lycopersicum	807950	722168	0.8938	11304	0.969	316	0.027	47	0.004	55.2	339	0.028
GPT144300	Solanum lycopersicum	667798	592597	0.8873	11331	0.971	291	0.025	45	0.004	54	339	0.028
GPT144430	Solanum lycopersicum	673790	588386	0.8732	11300	0.969	325	0.028	42	0.004	53.9	339	0.028
GPT139910	Solanum lycopersicum	579354	529475	0.9139	11289	0.968	322	0.028	56	0.005	53.6	339	0.028
GPT139870	Solanum lycopersicum	514016	469596	0.9135	11318	0.97	278	0.024	70	0.006	52.9	340	0.028
GPT127880	Solanum lycopersicum	622225	574781	0.9237	11314	0.97	274	0.023	79	0.007	54.2	339	0.028
GPT144220	Solanum lycopersicum	391891	346540	0.8842	11176	0.958	411	0.035	79	0.007	49.3	340	0.028
GPT138430	Solanum lycopersicum	657879	615765	0.9359	11275	0.966	285	0.024	107	0.009	54.4	339	0.028
GPT131200	Solanum lycopersicum	610338	568589	0.9315	11058	0.948	457	0.039	150	0.013	54	341	0.028
GPT144130	Solanum lycopersicum	391489	351948	0.8989	11273	0.966	226	0.019	168	0.014	49.7	339	0.028
GPT139570	Solanum lycopersicum	855529	802798	0.9383	11060	0.948	394	0.034	211	0.018	56	341	0.028
GPT134240	Solanum lycopersicum	579165	547173	0.9447	11227	0.962	183	0.016	257	0.022	54.1	339	0.028
GPT128670	Solanum lycopersicum	639933	602908	0.9421	10618	0.91	375	0.032	671	0.058	54.2	342	0.028
GPT128120	Solanum lycopersicum	715007	674200	0.9429	11310	0.97	318	0.027	33	0.003	55	345	0.029
GPT144390	Solanum lycopersicum	549625	488966	0.8896	11298	0.969	324	0.028	41	0.004	52.9	343	0.029
GPT139950	Solanum lycopersicum	956016	900428	0.9418	11173	0.958	425	0.036	64	0.005	56.8	344	0.029
GPT144180	Solanum lycopersicum	564818	513999	0.91	11187	0.959	419	0.036	56	0.005	53.3	344	0.029
GPT130110	Solanum lycopersicum	660307	611337	0.9258	11162	0.957	372	0.032	127	0.011	54.5	345	0.029
GPT128740	Solanum lycopersicum	681661	640351	0.9393	11008	0.944	506	0.043	144	0.012	54.5	348	0.029
GPT131710	Solanum lycopersicum	433745	407003	0.9383	11024	0.945	297	0.025	340	0.029	51.9	345	0.029
GPT142240	Solanum lycopersicum	615680	575112	0.9341	9337	0.802	1919	0.165	381	0.033	52.9	369	0.031
GPT141050	Solanum lycopersicum	373963	345759	0.9245	10475	0.901	678	0.058	477	0.041	49.4	376	0.031
GPT124070	Solanum lycopersicum	724653	682871	0.9423	11106	0.972	305	0.027	14	0.001	55.1	581	0.048
GPT127490	Solanum lycopersicum	590966	549662	0.9301	11069	0.969	341	0.03	15	0.001	52.8	581	0.048
GPT123100	Solanum lycopersicum	658368	620581	0.9426	11019	0.964	383	0.034	24	0.002	54.2	580	0.048
GPT126130	Solanum lycopersicum	362801	338561	0.9331	11057	0.968	340	0.03	27	0.002	48.5	582	0.048
GPT129120	Solanum lycopersicum	747952	710777	0.9502	11029	0.965	376	0.033	20	0.002	55.2	581	0.048
GPT141960	Solanum lycopersicum	931156	878119	0.943	11103	0.972	302	0.026	21	0.002	57.9	580	0.048
GPT142120	Solanum lycopersicum	607159	563328	0.9278	11112	0.973	295	0.026	18	0.002	53	581	0.048
GPT143810	Solanum lycopersicum	521492	472375	0.9058	11140	0.975	255	0.022	31	0.003	52	580	0.048
GPT144200	Solanum lycopersicum	457296	421611	0.9219	11132	0.974	256	0.022	38	0.003	51.2	580	0.048
GPT131580	Solanum lycopersicum	701702	665840	0.9488	11070	0.969	297	0.026	57	0.005	54.7	582	0.048
GPT124960	Solanum lycopersicum	593847	533000	0.8975	10962	0.96	431	0.038	26	0.002	52.2	587	0.049
GPT138970	Solanum lycopersicum	454671	432217	0.9506	11053	0.968	347	0.03	20	0.002	50.2	586	0.049
GPT138910	Solanum lycopersicum	323004	305014	0.9443	11113	0.973	275	0.024	31	0.003	45	587	0.049
GPT139370	Solanum lycopersicum	618494	563005	0.9102	10959	0.96	423	0.037	37	0.003	53	587	0.049
GPT142040	Solanum lycopersicum	491919	461385	0.9379	10975	0.962	408	0.036	31	0.003	50.5	592	0.049
GPT126590	Solanum lycopersicum	607714	540068	0.8886	11026	0.965	348	0.03	47	0.004	52.6	585	0.049
GPT137590	Solanum lycopersicum	445078	414600	0.9315	10875	0.952	508	0.044	40	0.004	51.2	583	0.049
GPT135420	Solanum lycopersicum	911090	853170	0.9364	11038	0.966	300	0.026	84	0.007	56.4	584	0.049
GPT123760	Solanum lycopersicum	524187	486506	0.9281	10913	0.956	407	0.036	95	0.008	52.3	591	0.049
GPT133520	Solanum lycopersicum	742189	685063	0.923	10212	0.894	218	0.019	993	0.087	54.5	583	0.049
GPT132810	Solanum lycopersicum	501993	451286	0.8989	10623	0.931	754	0.066	34	0.003	51.5	595	0.05
GPT137890	Solanum lycopersicum	344385	312375	0.907	10948	0.961	393	0.034	51	0.004	45.2	614	0.051
GPT124880	Solanum lycopersicum	6860	5950	0.8673	6547	0.986	70	0.011	22	0.003	1	5367	0.447
GPT130370	Solanum lycopersicum	3799	3268	0.8602	4562	0.995	18	0.004	5	0.001	0.5	7421	0.618
GPT141120	Solanum lycopersicum	644	567	0.8804	883	0.992	7	0.008	0	0	0.1	11116	0.926
GPT134560	Solanum neorickii	763203	684873	0.8973	5673	0.487	4501	0.387	1466	0.126	47.6	366	0.03
GPT135030	Solanum neorickii	440920	399455	0.9059	5671	0.491	4530	0.392	1346	0.117	43.2	459	0.038
GPT135040	Solanum neorickii	336755	309440	0.9188	5417	0.474	4514	0.395	1495	0.131	42.7	580	0.048
GPT134830	Solanum neorickii	362000	325830	0.9	5368	0.472	4832	0.425	1168	0.103	43	638	0.053
GPT135010	Solanum pennellii	439881	374874	0.8522	5176	0.448	3202	0.277	3170	0.275	37.3	458	0.038
GPT135110	Solanum pimpinellifolium	628815	575957	0.9159	9829	0.821	1812	0.151	325	0.027	52.7	40	0.003
GPT135100	Solanum pimpinellifolium	700788	643951	0.9188	9310	0.778	1932	0.161	724	0.061	54	40	0.003
GPT134660	Solanum pimpinellifolium	662538	605573	0.914	9596	0.803	2073	0.173	284	0.024	53.5	53	0.004
GPT134880	Solanum pimpinellifolium	809355	743498	0.9186	6854	0.574	4262	0.357	826	0.069	53.6	64	0.005
GPT131820	Solanum pimpinellifolium	642247	596783	0.9292	6620	0.555	4678	0.392	621	0.052	51.6	87	0.007
GPT134930	Solanum pimpinellifolium	748032	679432	0.9082	6806	0.571	4168	0.349	953	0.08	52.8	79	0.007
GPT134900	Solanum pimpinellifolium	385160	357879	0.9292	6684	0.562	4824	0.406	385	0.032	48.1	113	0.009
GPT134870	Solanum pimpinellifolium	525772	493032	0.9377	6594	0.554	4357	0.366	944	0.079	50.7	111	0.009
GPT134690	Solanum pimpinellifolium	522526	492377	0.9423	8005	0.674	3706	0.312	172	0.014	48.8	123	0.01
GPT134640	Solanum pimpinellifolium	332682	303567	0.9124	7924	0.667	3038	0.256	920	0.077	43.9	124	0.01
GPT134810	Solanum pimpinellifolium	563026	527042	0.936	7714	0.658	3616	0.308	398	0.034	51.3	278	0.023
GPT135090	Solanum pimpinellifolium	474562	425666	0.8969	8771	0.748	2511	0.214	441	0.038	50.7	283	0.024
GPT134730	Solanum pimpinellifolium	518093	476622	0.9199	7700	0.658	3485	0.298	517	0.044	50.6	304	0.025
GPT134820	Solanum pimpinellifolium	558047	520167	0.9321	7810	0.668	3615	0.309	272	0.023	51.1	309	0.026
GPT134700	Solanum pimpinellifolium	558964	522099	0.934	7813	0.668	3519	0.301	361	0.031	51.1	313	0.026
GPT134720	Solanum pimpinellifolium	568283	524454	0.9228	7849	0.671	3408	0.292	433	0.037	51.4	316	0.026
GPT134920	Solanum pimpinellifolium	437761	403612	0.9219	6450	0.552	4415	0.378	812	0.07	49.1	329	0.027
GPT134740	Solanum pimpinellifolium	445037	413171	0.9283	7944	0.681	3311	0.284	403	0.035	49.6	348	0.029
GPT134670	Solanum pimpinellifolium	593175	538885	0.9084	7742	0.667	3414	0.294	455	0.039	51.7	395	0.033
GPT134710	Solanum pimpinellifolium	599391	560132	0.9345	7734	0.666	3334	0.287	544	0.047	52	394	0.033

## Sheet: Supplementary Table S3
Supplementary Table S3: Eggplant genepool accessions and SNPs metrics
Sample	Species	Sequence reads	AlignedReads	%Aligned	nRefHom	%RefHom	nNonRefHom	%nNonRefHom	nHets	%HET	average depth	nMissing	%MISSING
GPE021700	S.aethiopicum	506345	469972	0.928	22461	0.734	7489	0.245	645	0.021	44.2	136	0.004
GPE003660	S.aethiopicum	911787	836201	0.917	22500	0.735	7415	0.242	686	0.022	46	130	0.004
GPE021760	S.aethiopicum	522590	488471	0.935	22511	0.736	7595	0.248	462	0.015	46.2	163	0.005
GPE021830	S.aethiopicum	768874	718797	0.935	22495	0.735	7563	0.247	527	0.017	47.8	146	0.005
GPE021660	S.aethiopicum	571536	536322	0.938	22468	0.735	7548	0.247	550	0.018	45.7	165	0.005
GPE021800	S.aethiopicum	401106	372620	0.929	22461	0.735	7540	0.247	562	0.018	43.8	168	0.005
GPE021670	S.aethiopicum	567485	531594	0.937	22436	0.734	7533	0.246	593	0.019	45.6	169	0.005
GPE022740	S.aethiopicum	451259	420760	0.932	22491	0.736	7501	0.245	582	0.019	43.1	157	0.005
GPE021560	S.aethiopicum	606780	566906	0.934	22483	0.736	7577	0.248	497	0.016	47.1	174	0.006
GPE021790	S.aethiopicum	511487	476120	0.931	22478	0.736	7584	0.248	492	0.016	46	177	0.006
GPE021680	S.aethiopicum	493420	460929	0.934	22484	0.736	7524	0.246	526	0.017	44.5	197	0.006
GPE021860	S.aethiopicum	528522	492528	0.932	22464	0.736	7566	0.248	509	0.017	46	192	0.006
GPE021530	S.aethiopicum	412069	383747	0.931	22445	0.735	7529	0.247	565	0.019	44	192	0.006
GPE003640	S.aethiopicum	307173	289058	0.941	22505	0.737	7390	0.242	647	0.021	40.3	189	0.006
GPE021970	S.aethiopicum	407492	380790	0.934	22482	0.737	7578	0.248	449	0.015	43.9	222	0.007
GPE021820	S.aethiopicum	378803	354637	0.936	22479	0.737	7558	0.248	482	0.016	43	212	0.007
GPE021690	S.aethiopicum	514656	481367	0.935	22437	0.735	7566	0.248	522	0.017	45.7	206	0.007
GPE021720	S.aethiopicum	517838	483749	0.934	22502	0.737	7511	0.246	517	0.017	45	201	0.007
GPE020500	S.aethiopicum	424983	393353	0.926	22436	0.735	7509	0.246	563	0.018	43.9	223	0.007
GPE021570	S.aethiopicum	325195	300865	0.925	22484	0.737	7406	0.243	617	0.02	40	224	0.007
GPE022030	S.aethiopicum	423959	396657	0.936	22456	0.737	7589	0.249	440	0.014	44.4	246	0.008
GPE021520	S.aethiopicum	563361	526382	0.934	22454	0.736	7519	0.247	527	0.017	45.5	231	0.008
GPE022750	S.aethiopicum	419026	388714	0.928	22412	0.735	7547	0.248	513	0.017	42.5	259	0.008
GPE003670	S.aethiopicum	381971	360287	0.943	22426	0.735	7513	0.246	560	0.018	43.7	232	0.008
GPE021900	S.aethiopicum	276976	257393	0.929	22455	0.736	7395	0.243	644	0.021	37.3	237	0.008
GPE003650	S.aethiopicum	248979	232277	0.933	22427	0.735	7299	0.239	770	0.025	35.8	235	0.008
GPE021550	S.aethiopicum	275041	258488	0.94	22391	0.736	7562	0.248	487	0.016	37.9	291	0.009
GPE021640	S.aethiopicum	322373	300744	0.933	22396	0.735	7499	0.246	565	0.019	40.7	271	0.009
GPE021850	S.aethiopicum	295372	277240	0.939	22375	0.736	7577	0.249	469	0.015	39.4	310	0.01
GPE059420	S.aethiopicum gilo	407411	382873	0.94	22519	0.736	7554	0.247	506	0.017	44.3	152	0.005
GPE022060	S.aethiopicum-anguivi	636371	593929	0.933	22434	0.733	6932	0.226	1244	0.041	47.3	121	0.004
GPE021710	S.aethiopicum-anguivi	646924	604982	0.935	22422	0.734	7513	0.246	627	0.021	46.5	169	0.005
GPE021840	S.aethiopicum-anguivi	496208	463962	0.935	22458	0.735	7572	0.248	511	0.017	45.6	190	0.006
GPE022000	S.aethiopicum-anguivi	438483	407500	0.929	22462	0.735	7549	0.247	543	0.018	44.8	177	0.006
GPE021880	S.aethiopicum-anguivi	419400	393593	0.938	22493	0.737	7548	0.247	487	0.016	43.3	203	0.007
GPE022040	S.aethiopicum-anguivi	384940	359144	0.933	22432	0.736	7554	0.248	495	0.016	43	250	0.008
GPE021750	S.anguivi	618629	574863	0.929	22471	0.735	7516	0.246	588	0.019	47.1	156	0.005
GPE021890	S.anguivi	313690	289773	0.924	22469	0.736	7499	0.246	576	0.019	38.5	187	0.006
GPE021780	S.anguivi	516718	482302	0.933	22461	0.736	7539	0.247	516	0.017	46	215	0.007
GPE059500	S.incanum	449394	428817	0.954	26254	0.859	4112	0.135	203	0.007	46.4	162	0.005
GPE022500	S.linnaeanum	436268	416133	0.954	24947	0.823	5151	0.17	228	0.008	45.7	405	0.013
GPE020810	S.linnaeanum	286528	271595	0.948	24961	0.823	5073	0.167	308	0.01	39.5	389	0.013
GPE003780	S.linnaeanum	231430	221512	0.957	24888	0.823	5074	0.168	293	0.01	34.9	476	0.015
GPE003740	S.linnaeanum	6245	5868	0.94	14439	0.93	915	0.059	165	0.011	1	15212	0.495
GPE021620	S.macrocarpon	253413	235935	0.931	21121	0.714	7439	0.251	1021	0.035	34.4	1150	0.037
GPE022070	S.macrocarpon	496857	466037	0.938	21078	0.714	7874	0.267	550	0.019	42.3	1229	0.04
GPE021590	S.macrocarpon	453759	426696	0.94	21029	0.714	7822	0.265	617	0.021	41.2	1263	0.041
GPE021630	S.macrocarpon	314248	292959	0.932	21028	0.714	7754	0.263	689	0.023	38.6	1260	0.041
GPE021580	S.macrocarpon	299387	278910	0.932	21016	0.713	7725	0.262	716	0.024	36.4	1274	0.041
GPE021950	S.macrocarpon	264535	246407	0.931	20830	0.71	7800	0.266	698	0.024	35.4	1403	0.046
GPE003610	S.macrocarpon	207347	195364	0.942	20872	0.714	7411	0.254	939	0.032	30.3	1509	0.049
GPE021930	S.macrocarpon	249455	234555	0.94	20726	0.713	7773	0.267	584	0.02	34.8	1648	0.054
GPE021990	S.macrocarpon	189163	177598	0.939	20607	0.712	7682	0.265	655	0.023	28.5	1787	0.058
control31	S.melongena	693278	670031	0.966	30701	0.999	6	0	21	0.001	67.3	3	0
GPE000450	S.melongena	1033604	1000211	0.968	29454	0.959	1224	0.04	43	0.001	57.3	10	0
GPE000470	S.melongena	807886	780796	0.966	29376	0.956	1320	0.043	33	0.001	55.4	2	0
GPE000490	S.melongena	674445	651705	0.966	29731	0.968	960	0.031	37	0.001	54.5	3	0
GPE000640	S.melongena	905214	875816	0.968	29598	0.963	1094	0.036	34	0.001	56.4	5	0
GPE000690	S.melongena	706834	681958	0.965	29694	0.967	993	0.032	33	0.001	54.5	11	0
GPE000700	S.melongena	498617	482412	0.968	29956	0.975	739	0.024	36	0.001	52.3	0	0
GPE000710	S.melongena	432027	411873	0.953	29972	0.976	712	0.023	40	0.001	50.5	7	0
GPE000720	S.melongena	821558	791687	0.964	30094	0.979	596	0.019	40	0.001	55.7	1	0
GPE000730	S.melongena	478804	462759	0.966	30019	0.977	679	0.022	32	0.001	50.8	1	0
GPE000740	S.melongena	710975	684411	0.963	29979	0.976	704	0.023	45	0.001	54.6	3	0
GPE000750	S.melongena	727973	697789	0.959	29899	0.973	789	0.026	40	0.001	55.2	3	0
GPE000760	S.melongena	496220	479491	0.966	29738	0.968	957	0.031	35	0.001	52.3	1	0
GPE000770	S.melongena	945220	914437	0.967	30093	0.979	595	0.019	42	0.001	56.9	1	0
GPE000780	S.melongena	921251	890567	0.967	30087	0.979	610	0.02	33	0.001	56.4	1	0
GPE000790	S.melongena	603786	576911	0.955	30095	0.979	594	0.019	42	0.001	53.8	0	0
GPE000800	S.melongena	661281	635734	0.961	30188	0.982	511	0.017	31	0.001	53.9	1	0
GPE000810	S.melongena	345353	333374	0.965	30108	0.98	575	0.019	42	0.001	47.5	6	0
GPE000820	S.melongena	627438	605091	0.964	30234	0.984	463	0.015	34	0.001	53.7	0	0
GPE000830	S.melongena	925468	889672	0.961	30097	0.979	596	0.019	37	0.001	56.7	1	0
GPE001030	S.melongena	668954	645559	0.965	29639	0.965	1053	0.034	36	0.001	53.9	3	0
GPE001040	S.melongena	625128	599608	0.959	30130	0.981	548	0.018	40	0.001	53.7	13	0
GPE001050	S.melongena	1687464	1616853	0.958	30068	0.978	628	0.02	35	0.001	62.7	0	0
GPE001070	S.melongena	496199	476176	0.96	30214	0.983	472	0.015	43	0.001	51.9	2	0
GPE001290	S.melongena	1655315	1600252	0.967	29520	0.961	1165	0.038	33	0.001	62.1	13	0
GPE001330	S.melongena	588549	561774	0.955	29607	0.964	1082	0.035	39	0.001	52.7	3	0
GPE001350	S.melongena	1182610	1140891	0.965	28390	0.924	2291	0.075	46	0.001	57.8	4	0
GPE001420	S.melongena	655630	631148	0.963	29677	0.966	1017	0.033	36	0.001	53.9	1	0
GPE001450	S.melongena	886573	854628	0.964	29334	0.955	1351	0.044	35	0.001	55.9	11	0
GPE001480	S.melongena	747900	723360	0.967	28511	0.928	2170	0.071	45	0.001	54.6	5	0
GPE001500	S.melongena	722699	700725	0.97	30193	0.982	507	0.016	31	0.001	54.6	0	0
GPE001520	S.melongena	1302757	1262789	0.969	29732	0.968	960	0.031	37	0.001	59.6	2	0
GPE001550	S.melongena	865974	835648	0.965	29909	0.974	779	0.025	32	0.001	55.9	11	0
GPE001560	S.melongena	708660	685882	0.968	29907	0.974	777	0.025	34	0.001	54	13	0
GPE001580	S.melongena	2550498	2463465	0.966	29732	0.968	958	0.031	39	0.001	70	2	0
GPE001940	S.melongena	350554	338004	0.964	30064	0.978	624	0.02	40	0.001	47.9	3	0
GPE001950	S.melongena	426617	410799	0.963	29837	0.971	844	0.027	36	0.001	50.7	14	0
GPE001970	S.melongena	468747	1409921	0.96	30705	0.999	1	0	25	0.001	60.9	0	0
GPE001970b	S.melongena	447180	424491	0.949	30696	0.999	5	0	30	0.001	51.1	0	0
GPE002630	S.melongena	466035	451336	0.968	30074	0.979	610	0.02	34	0.001	51.4	13	0
GPE002820	S.melongena	791246	764321	0.966	28461	0.926	2229	0.073	40	0.001	55.1	1	0
GPE002880	S.melongena	591046	570925	0.966	29478	0.96	1209	0.039	35	0.001	53.3	9	0
GPE002930	S.melongena	621872	600548	0.966	29341	0.955	1349	0.044	34	0.001	53.5	7	0
GPE003350	S.melongena	971834	929720	0.957	28721	0.935	1953	0.064	46	0.001	56.6	11	0
GPE003470	S.melongena	430345	413371	0.961	29977	0.975	725	0.024	29	0.001	51	0	0
GPE003560	S.melongena	570992	552865	0.968	29988	0.976	707	0.023	36	0.001	50.5	0	0
GPE020610	S.melongena	322765	309399	0.959	28528	0.928	2156	0.07	46	0.001	42.1	1	0
GPE021010	S.melongena	509310	492653	0.967	28773	0.936	1919	0.062	38	0.001	49.4	1	0
GPE021240	S.melongena	427485	412969	0.966	29668	0.965	1024	0.033	39	0.001	47.3	0	0
GPE021290	S.melongena	716261	694009	0.969	28592	0.93	2094	0.068	44	0.001	51.3	1	0
GPE021360	S.melongena	494707	477905	0.966	28386	0.924	2300	0.075	45	0.001	49.4	0	0
GPE021510	S.melongena	573909	552078	0.962	28621	0.931	2061	0.067	44	0.001	49.7	5	0
GPE021870	S.melongena	517935	499738	0.965	28444	0.926	2239	0.073	45	0.001	49.3	3	0
GPE022530	S.melongena	371882	358895	0.965	28615	0.931	2069	0.067	41	0.001	46.4	6	0
GPE022640	S.melongena	451398	432523	0.958	28497	0.927	2186	0.071	46	0.001	46.3	2	0
GPE000420	S.melongena	664806	633852	0.953	28744	0.935	1924	0.063	62	0.002	54	1	0
GPE000430	S.melongena	691902	668974	0.967	29127	0.948	1520	0.049	74	0.002	54.4	10	0
GPE000440	S.melongena	2185529	2116833	0.969	28533	0.929	2131	0.069	58	0.002	67.3	9	0
GPE000480	S.melongena	846995	821769	0.97	28676	0.933	1996	0.065	50	0.002	55.7	9	0
GPE000510	S.melongena	571668	551680	0.965	28427	0.925	2240	0.073	57	0.002	53.1	7	0
GPE000540	S.melongena	619463	594292	0.959	28466	0.926	2202	0.072	61	0.002	53.4	2	0
GPE000550	S.melongena	532153	509869	0.958	28568	0.93	2108	0.069	52	0.002	52.5	3	0
GPE000560	S.melongena	621903	598554	0.962	28572	0.93	2100	0.068	59	0.002	53.6	0	0
GPE000590	S.melongena	997393	963758	0.966	28529	0.928	2144	0.07	54	0.002	56.7	4	0
GPE000610	S.melongena	830686	803577	0.967	28373	0.923	2299	0.075	54	0.002	55.4	5	0
GPE000670	S.melongena	795901	768266	0.965	29614	0.964	1061	0.035	55	0.002	55.5	1	0
GPE000680	S.melongena	765128	730259	0.954	28378	0.923	2289	0.074	62	0.002	54.7	2	0
GPE000880	S.melongena	582191	558926	0.96	28519	0.928	2144	0.07	58	0.002	52.8	10	0
GPE000900	S.melongena	478365	460577	0.963	28453	0.926	2210	0.072	57	0.002	51.2	11	0
GPE000940	S.melongena	936533	897906	0.959	28658	0.933	1994	0.065	73	0.002	56.8	6	0
GPE000950	S.melongena	763862	731906	0.958	28730	0.935	1947	0.063	51	0.002	55	3	0
GPE001000	S.melongena	703997	671965	0.954	28599	0.931	2079	0.068	47	0.002	54.1	6	0
GPE001220	S.melongena	1129964	1076134	0.952	28485	0.927	2186	0.071	56	0.002	58	4	0
GPE001240	S.melongena	1048856	1012589	0.965	28382	0.924	2295	0.075	48	0.002	57	6	0
GPE001260	S.melongena	603931	582488	0.964	28379	0.924	2288	0.074	55	0.002	53	9	0
GPE001270	S.melongena	597981	575102	0.962	28562	0.93	2103	0.068	59	0.002	53	7	0
GPE001280	S.melongena	1187876	1144029	0.963	28386	0.924	2287	0.074	55	0.002	58.2	3	0
GPE001300	S.melongena	502334	485247	0.966	28675	0.933	1980	0.064	71	0.002	51.9	5	0
GPE001320	S.melongena	1160308	1119270	0.965	28573	0.93	2106	0.069	51	0.002	58	1	0
GPE001360	S.melongena	1078709	1037627	0.962	28386	0.924	2291	0.075	52	0.002	57.1	2	0
GPE001370	S.melongena	1317550	1276191	0.969	28560	0.929	2119	0.069	49	0.002	59.3	3	0
GPE001390	S.melongena	645225	624656	0.968	28557	0.929	2110	0.069	59	0.002	53.4	5	0
GPE001440	S.melongena	482341	462886	0.96	28544	0.929	2118	0.069	64	0.002	51.2	5	0
GPE001470	S.melongena	356679	342624	0.961	28582	0.931	2069	0.067	65	0.002	47.4	15	0
GPE001540	S.melongena	807468	781871	0.968	29482	0.96	1160	0.038	74	0.002	55.3	15	0
GPE001600	S.melongena	1157871	1118230	0.966	28688	0.934	1976	0.064	54	0.002	57.9	13	0
GPE001630	S.melongena	803170	777294	0.968	28783	0.937	1877	0.061	61	0.002	55	10	0
GPE001690	S.melongena	787245	754843	0.959	28608	0.931	2055	0.067	61	0.002	55	7	0
GPE001720	S.melongena	564422	546617	0.968	29710	0.967	973	0.032	48	0.002	53	0	0
GPE001740	S.melongena	581141	560577	0.965	28642	0.932	2022	0.066	59	0.002	53.1	8	0
GPE001760	S.melongena	651270	624553	0.959	28718	0.935	1937	0.063	71	0.002	54	5	0
GPE001770	S.melongena	481527	460057	0.955	28803	0.938	1853	0.06	60	0.002	51.7	15	0
GPE001780	S.melongena	3358507	3237724	0.964	28380	0.924	2296	0.075	48	0.002	76.2	7	0
GPE001830	S.melongena	588702	569404	0.967	28690	0.934	1978	0.064	58	0.002	53.1	5	0
GPE001850	S.melongena	589118	568752	0.965	28403	0.925	2263	0.074	52	0.002	53	13	0
GPE001900	S.melongena	429057	403944	0.941	29632	0.964	1051	0.034	47	0.002	50.3	1	0
GPE001930	S.melongena	1477003	1396409	0.945	30189	0.982	485	0.016	56	0.002	56.8	1	0
GPE001960	S.melongena	766268	726245	0.948	28525	0.928	2142	0.07	61	0.002	55	3	0
GPE001980	S.melongena	590268	562748	0.953	28323	0.922	2343	0.076	61	0.002	52.9	4	0
GPE002530	S.melongena	596663	569316	0.954	29018	0.945	1641	0.053	62	0.002	53.6	10	0
GPE002550	S.melongena	886229	848910	0.958	29320	0.954	1351	0.044	47	0.002	54.2	13	0
GPE002560	S.melongena	2987088	2861686	0.958	29309	0.954	1364	0.044	47	0.002	67.1	11	0
GPE002640	S.melongena	439159	421118	0.959	29995	0.976	682	0.022	47	0.002	51	7	0
GPE002730	S.melongena	661087	633277	0.958	30031	0.977	649	0.021	50	0.002	54.2	1	0
GPE002750	S.melongena	807777	771999	0.956	29893	0.973	776	0.025	55	0.002	53.9	7	0
GPE002810	S.melongena	658173	635814	0.966	28458	0.926	2215	0.072	53	0.002	53.8	5	0
GPE003020	S.melongena	443695	426249	0.961	28777	0.937	1898	0.062	53	0.002	50.7	3	0
GPE003370	S.melongena	586652	559602	0.954	28565	0.93	2091	0.068	71	0.002	52.8	4	0
GPE003400	S.melongena	621340	598264	0.963	28387	0.924	2287	0.074	50	0.002	53.6	7	0
GPE003440	S.melongena	719321	685344	0.953	28724	0.935	1941	0.063	58	0.002	54.3	8	0
GPE003540	S.melongena	303158	292887	0.966	28355	0.923	2302	0.075	60	0.002	43.1	14	0
GPE003570	S.melongena	409382	396508	0.969	28750	0.936	1911	0.062	65	0.002	47.8	5	0
GPE020510	S.melongena	386176	371137	0.961	28608	0.931	2074	0.067	48	0.002	44.9	1	0
GPE020530	S.melongena	498012	481779	0.967	28593	0.93	2080	0.068	57	0.002	48.9	1	0
GPE020540	S.melongena	504946	485056	0.961	28384	0.924	2287	0.074	58	0.002	48.6	2	0
GPE020560	S.melongena	376206	363821	0.967	28571	0.93	2109	0.069	51	0.002	46.2	0	0
GPE020650	S.melongena	264691	252070	0.952	28623	0.931	2031	0.066	75	0.002	38.8	2	0
GPE020680	S.melongena	414258	399449	0.964	28612	0.931	2067	0.067	49	0.002	47.6	3	0
GPE020710	S.melongena	420315	406596	0.967	28546	0.929	2118	0.069	59	0.002	47.4	8	0
GPE020790	S.melongena	448608	434036	0.968	28510	0.928	2143	0.07	63	0.002	48	15	0
GPE020800	S.melongena	431955	416810	0.965	28670	0.933	1986	0.065	69	0.002	48.1	6	0
GPE020840	S.melongena	320880	308177	0.96	28554	0.929	2110	0.069	67	0.002	42.3	0	0
GPE020910	S.melongena	353660	340022	0.961	28532	0.929	2134	0.069	63	0.002	44.9	2	0
GPE020940	S.melongena	275488	264253	0.959	28531	0.928	2127	0.069	72	0.002	38.7	1	0
GPE020970	S.melongena	332257	320934	0.966	28660	0.933	2019	0.066	52	0.002	44.8	0	0
GPE020980	S.melongena	405677	390990	0.964	28554	0.929	2126	0.069	49	0.002	47.6	2	0
GPE021000	S.melongena	378966	366361	0.967	28682	0.934	1978	0.064	58	0.002	46.7	13	0
GPE021040	S.melongena	394944	381942	0.967	28644	0.932	2017	0.066	68	0.002	47.2	2	0
GPE021050	S.melongena	336705	325458	0.967	28543	0.929	2116	0.069	72	0.002	44.8	0	0
GPE021060	S.melongena	418702	404470	0.966	28382	0.924	2297	0.075	47	0.002	47.6	5	0
GPE021080	S.melongena	597582	574643	0.962	28380	0.924	2294	0.075	54	0.002	50	3	0
GPE021130	S.melongena	349317	336505	0.963	28672	0.933	1985	0.065	72	0.002	45.1	2	0
GPE021160	S.melongena	316336	305518	0.966	28701	0.934	1964	0.064	66	0.002	43.4	0	0
GPE021180	S.melongena	437498	419334	0.958	28374	0.923	2295	0.075	60	0.002	47.7	2	0
GPE021250	S.melongena	181844	175484	0.965	28523	0.928	2148	0.07	58	0.002	29.6	2	0
GPE021300	S.melongena	401390	388364	0.968	28556	0.929	2116	0.069	50	0.002	47.4	9	0
GPE021310	S.melongena	493579	477185	0.967	28569	0.93	2089	0.068	71	0.002	49.1	2	0
GPE021330	S.melongena	654546	629708	0.962	28374	0.923	2283	0.074	72	0.002	50.3	2	0
GPE021340	S.melongena	412467	395142	0.958	28518	0.928	2156	0.07	56	0.002	46.9	1	0
GPE021380	S.melongena	450665	435449	0.966	28993	0.943	1662	0.054	75	0.002	48.3	1	0
GPE021410	S.melongena	363555	350569	0.964	28385	0.924	2291	0.075	52	0.002	46.1	3	0
GPE021460	S.melongena	205346	199073	0.969	28601	0.931	2064	0.067	66	0.002	32.9	0	0
GPE021470	S.melongena	451356	432337	0.958	28580	0.93	2074	0.067	72	0.002	46.2	5	0
GPE021490	S.melongena	382791	368180	0.962	28253	0.919	2417	0.079	59	0.002	44.8	2	0
GPE022010	S.melongena	641096	617088	0.963	28686	0.934	1986	0.065	57	0.002	49.7	2	0
GPE022050	S.melongena	592236	570102	0.963	28548	0.929	2121	0.069	59	0.002	49.1	3	0
GPE022100	S.melongena	279435	268545	0.961	28568	0.93	2106	0.069	55	0.002	39.2	2	0
GPE022110	S.melongena	520917	501428	0.963	28493	0.927	2186	0.071	50	0.002	48.2	2	0
GPE022130	S.melongena	332454	319825	0.962	28485	0.927	2182	0.071	62	0.002	42.8	2	0
GPE022140	S.melongena	554966	536772	0.967	28491	0.927	2189	0.071	48	0.002	50.1	3	0
GPE022160	S.melongena	358604	344304	0.96	28608	0.931	2068	0.067	55	0.002	43.7	0	0
GPE022180	S.melongena	487566	470379	0.965	28625	0.932	2041	0.066	64	0.002	48.8	1	0
GPE022190	S.melongena	362162	346352	0.956	28383	0.924	2292	0.075	55	0.002	45.5	1	0
GPE022210	S.melongena	377879	365191	0.966	28611	0.931	2059	0.067	56	0.002	46.3	5	0
GPE022220	S.melongena	624593	600728	0.962	28765	0.936	1912	0.062	52	0.002	49.9	2	0
GPE022350	S.melongena	342821	328940	0.96	28314	0.921	2351	0.077	64	0.002	44.1	2	0
GPE022400	S.melongena	380113	366888	0.965	28787	0.937	1879	0.061	60	0.002	45.7	5	0
GPE022440	S.melongena	544538	526595	0.967	28725	0.935	1955	0.064	49	0.002	49.2	2	0
GPE022540	S.melongena	579620	561362	0.969	28531	0.928	2148	0.07	50	0.002	49.8	2	0
GPE022550	S.melongena	267093	257971	0.966	28661	0.933	2008	0.065	60	0.002	40.2	2	0
GPE022570	S.melongena	530430	510194	0.962	28490	0.927	2183	0.071	56	0.002	49	2	0
GPE022590	S.melongena	497200	479724	0.965	28491	0.927	2189	0.071	48	0.002	49.2	3	0
GPE022600	S.melongena	349181	336481	0.964	28477	0.927	2183	0.071	69	0.002	44.1	2	0
GPE022630	S.melongena	453755	438817	0.967	28486	0.927	2186	0.071	54	0.002	48.5	5	0
GPE022650	S.melongena	638583	617736	0.967	28487	0.927	2188	0.071	53	0.002	50.6	3	0
GPE022690	S.melongena	360382	348671	0.968	28628	0.932	2042	0.066	58	0.002	45.5	3	0
GPE022820	S.melongena	280809	270820	0.964	28450	0.926	2222	0.072	53	0.002	41.3	6	0
GPE022850	S.melongena	594082	572366	0.963	28620	0.931	2053	0.067	57	0.002	49.1	1	0
GPE022880	S.melongena	423765	408209	0.963	29160	0.949	1517	0.049	50	0.002	46.9	4	0
GPE022920	S.melongena	566499	546902	0.965	28583	0.93	2088	0.068	59	0.002	48.7	1	0
GPE022930	S.melongena	270726	259713	0.959	28873	0.94	1789	0.058	67	0.002	39.4	2	0
GPE022940	S.melongena	339741	326771	0.962	28543	0.929	2116	0.069	70	0.002	44.7	2	0
GPE022970	S.melongena	522918	505316	0.966	28309	0.921	2371	0.077	50	0.002	49.3	1	0
GPE023000	S.melongena	509497	486948	0.956	28258	0.92	2416	0.079	53	0.002	48.5	4	0
GPE023020	S.melongena	739593	714333	0.966	28674	0.933	1984	0.065	62	0.002	51	11	0
GPE023030	S.melongena	529728	509480	0.962	28728	0.935	1938	0.063	58	0.002	49.1	7	0
GPE000580	S.melongena	391199	372084	0.951	28389	0.924	2223	0.072	105	0.003	48.9	14	0
GPE000600	S.melongena	576042	550084	0.955	28362	0.923	2286	0.074	82	0.003	52.9	1	0
GPE000650	S.melongena	658417	631183	0.959	29883	0.973	755	0.025	83	0.003	54.3	10	0
GPE000660	S.melongena	809897	779928	0.963	29883	0.972	759	0.025	87	0.003	55.9	2	0
GPE000840	S.melongena	769515	734190	0.954	28510	0.928	2128	0.069	84	0.003	54.9	9	0
GPE000850	S.melongena	496082	476596	0.961	28586	0.93	2051	0.067	91	0.003	51.7	3	0
GPE000910	S.melongena	835062	801190	0.959	28309	0.922	2322	0.076	88	0.003	55.4	12	0
GPE000920	S.melongena	647764	619579	0.956	28504	0.928	2121	0.069	95	0.003	53.9	11	0
GPE000990	S.melongena	194656	186402	0.958	28675	0.933	1943	0.063	104	0.003	32.3	9	0
GPE001090	S.melongena	741517	716388	0.966	29300	0.953	1345	0.044	84	0.003	54.4	2	0
GPE001210	S.melongena	1309467	1251427	0.956	28574	0.93	2070	0.067	82	0.003	59.3	5	0
GPE001800	S.melongena	532879	512839	0.962	28741	0.935	1892	0.062	90	0.003	52.4	8	0
GPE001880	S.melongena	307981	297605	0.966	28600	0.931	2035	0.066	91	0.003	44.5	5	0
GPE002610	S.melongena	678867	649033	0.956	29247	0.952	1381	0.045	102	0.003	54.5	1	0
GPE003430	S.melongena	473020	448567	0.948	28378	0.924	2271	0.074	77	0.003	51	5	0
GPE003490	S.melongena	791894	736702	0.93	28488	0.927	2146	0.07	86	0.003	54.9	11	0
GPE003510	S.melongena	355111	338151	0.952	28404	0.924	2244	0.073	82	0.003	44.9	1	0
GPE003520	S.melongena	303714	291116	0.959	28475	0.927	2155	0.07	96	0.003	44.9	5	0
GPE020570	S.melongena	417346	403329	0.966	28695	0.934	1949	0.063	87	0.003	47.4	0	0
GPE020780	S.melongena	443592	427059	0.963	28553	0.929	2085	0.068	92	0.003	47.9	1	0
GPE020860	S.melongena	360698	346603	0.961	28571	0.93	2073	0.067	86	0.003	44.1	1	0
GPE020870	S.melongena	170182	163329	0.96	28603	0.931	2051	0.067	77	0.003	26.9	0	0
GPE020960	S.melongena	300299	290530	0.967	28663	0.933	1974	0.064	91	0.003	43	3	0
GPE021260	S.melongena	248016	238030	0.96	28338	0.922	2312	0.075	78	0.003	37.2	3	0
GPE021270	S.melongena	266800	256153	0.96	28186	0.917	2464	0.08	78	0.003	38.2	3	0
GPE021430	S.melongena	160449	154736	0.964	28628	0.932	1993	0.065	105	0.003	25.8	5	0
GPE021980	S.melongena	207979	201048	0.967	28687	0.934	1951	0.064	79	0.003	33.6	14	0
GPE022430	S.melongena	439454	421662	0.96	28481	0.927	2162	0.07	85	0.003	47.4	3	0
GPE022840	S.melongena	555774	537472	0.967	28513	0.928	2114	0.069	103	0.003	49.4	1	0
GPE022870	S.melongena	692249	668366	0.965	28494	0.927	2131	0.069	104	0.003	50	2	0
GPE002650	S.melongena	754019	723255	0.959	30096	0.98	516	0.017	110	0.004	55.3	9	0
GPE002970	S.melongena	632612	608344	0.962	28737	0.935	1866	0.061	120	0.004	49.7	8	0
GPE003450	S.melongena	539758	519180	0.962	28792	0.937	1818	0.059	112	0.004	52.5	9	0
GPE003500	S.melongena	821996	783615	0.953	28520	0.928	2071	0.067	129	0.004	55.1	11	0
GPE020520	S.melongena	535386	518309	0.968	28469	0.926	2132	0.069	128	0.004	49.3	2	0
GPE021220	S.melongena	297299	285746	0.961	28690	0.934	1916	0.062	125	0.004	41.8	0	0
GPE022480	S.melongena	295549	284227	0.962	28542	0.929	2079	0.068	108	0.004	42	2	0
GPE000890	S.melongena	470844	451061	0.958	28661	0.933	1911	0.062	150	0.005	51.3	9	0
GPE001250	S.melongena	972890	940141	0.966	28374	0.923	2183	0.071	168	0.005	56.3	6	0
GPE002510	S.melongena	603967	579447	0.959	28685	0.933	1890	0.062	155	0.005	53.4	1	0
GPE002540	S.melongena	1905825	1831197	0.961	29504	0.96	1075	0.035	148	0.005	64.4	4	0
GPE002580	S.melongena	429530	412310	0.96	28419	0.925	2155	0.07	143	0.005	50.2	14	0
GPE002590	S.melongena	580613	555276	0.956	28427	0.925	2144	0.07	152	0.005	53.2	8	0
GPE002680	S.melongena	858280	823820	0.96	29497	0.96	1072	0.035	159	0.005	55.8	3	0
GPE003480	S.melongena	652654	624424	0.957	29936	0.974	632	0.021	162	0.005	54.1	1	0
GPE021030	S.melongena	233915	224143	0.958	28523	0.928	2043	0.066	165	0.005	35.6	0	0
GPE022680	S.melongena	1255305	1204077	0.959	28499	0.927	2092	0.068	139	0.005	55.6	1	0
GPE003000	S.melongena	540932	520692	0.963	28702	0.934	1854	0.06	172	0.006	52.6	3	0
GPE003530	S.melongena	437436	422460	0.966	28373	0.923	2158	0.07	196	0.006	50.9	4	0
GPE020580	S.melongena	290438	279321	0.962	28384	0.924	2146	0.07	193	0.006	41.5	8	0
GPE020730	S.melongena	508880	489600	0.962	28609	0.931	1943	0.063	179	0.006	47.1	0	0
GPE020990	S.melongena	193067	185064	0.959	28446	0.926	2089	0.068	193	0.006	30.2	3	0
GPE022890	S.melongena	365601	351094	0.96	28402	0.924	2151	0.07	178	0.006	45.5	0	0
GPE000570	S.melongena	681235	658915	0.967	28625	0.932	1873	0.061	222	0.007	54.3	11	0
GPE000860	S.melongena	400916	385562	0.962	28327	0.922	2186	0.071	208	0.007	49.3	10	0
GPE001310	S.melongena	1263165	1220178	0.966	28458	0.926	2068	0.067	204	0.007	58.8	1	0
GPE001490	S.melongena	750519	726085	0.967	28408	0.925	2103	0.068	215	0.007	54.4	5	0
GPE002790	S.melongena	785407	753819	0.96	28366	0.923	2150	0.07	208	0.007	55	7	0
GPE002920	S.melongena	612546	586151	0.957	28594	0.931	1930	0.063	204	0.007	53.2	3	0
GPE021140	S.melongena	483886	464085	0.959	28508	0.928	2014	0.066	209	0.007	46.5	0	0
GPE021320	S.melongena	578725	559935	0.968	28154	0.916	2354	0.077	221	0.007	49.7	2	0
GPE021370	S.melongena	610014	587064	0.962	28485	0.927	2029	0.066	217	0.007	50.1	0	0
GPE021420	S.melongena	411788	398436	0.968	28732	0.935	1795	0.058	200	0.007	47.4	4	0
GPE022770	S.melongena	506112	488416	0.965	28556	0.929	1961	0.064	213	0.007	48.3	1	0
GPE002690	S.melongena	137815	132833	0.964	28844	0.939	1630	0.053	248	0.008	20.9	9	0
GPE002800	S.melongena	589605	561670	0.953	28782	0.937	1707	0.056	235	0.008	53.1	7	0
GPE003390	S.melongena	841246	800941	0.952	28515	0.928	1957	0.064	246	0.008	55.3	13	0
GPE021170	S.melongena	229281	219345	0.957	28569	0.93	1904	0.062	247	0.008	34.1	11	0
GPE021350	S.melongena	422749	408268	0.966	28488	0.927	2005	0.065	236	0.008	47.8	2	0
GPE022420	S.melongena	696232	669980	0.962	28621	0.931	1851	0.06	258	0.008	50.6	1	0
GPE002720	S.melongena	599889	579744	0.966	28436	0.926	2024	0.066	265	0.009	53.3	6	0
GPE003410	S.melongena	329883	319193	0.968	28582	0.93	1877	0.061	272	0.009	47	0	0
GPE003550	S.melongena	443022	425309	0.96	28428	0.925	2018	0.066	282	0.009	50.9	3	0
GPE020950	S.melongena	413983	399662	0.965	28435	0.925	2009	0.065	286	0.009	47.3	1	0
GPE022230	S.melongena	466790	452088	0.969	28653	0.932	1795	0.058	282	0.009	48.1	1	0
GPE022830	S.melongena	390508	376923	0.965	28378	0.923	2081	0.068	271	0.009	46.4	1	0
GPE002960	S.melongena	906594	858182	0.947	28466	0.927	1958	0.064	300	0.01	56.1	7	0
GPE021150	S.melongena	505296	486965	0.964	28938	0.942	1492	0.049	300	0.01	47.8	1	0
GPE001150	S.melongena	1187899	1140043	0.96	28571	0.93	1809	0.059	348	0.011	58.5	3	0
GPE001530	S.melongena	1104228	1068832	0.968	29415	0.957	967	0.031	347	0.011	57.8	2	0
GPE002660	S.melongena	1331726	1258384	0.945	29592	0.963	797	0.026	342	0.011	50	0	0
GPE002740	S.melongena	562520	541487	0.963	28180	0.917	2217	0.072	327	0.011	52.6	7	0
GPE002840	S.melongena	613842	585997	0.955	28529	0.928	1859	0.06	340	0.011	53.2	3	0
GPE002990	S.melongena	434094	418484	0.964	28183	0.917	2214	0.072	330	0.011	50.6	4	0
GPE003360	S.melongena	763573	734349	0.962	29895	0.973	500	0.016	331	0.011	55.2	5	0
GPE022250	S.melongena	356090	343356	0.964	28836	0.938	1555	0.051	338	0.011	45.9	2	0
GPE001020	S.melongena	536966	517529	0.964	29045	0.945	1323	0.043	362	0.012	52.4	1	0
GPE002500	S.melongena	680696	651483	0.957	28530	0.928	1835	0.06	365	0.012	54.2	1	0
GPE001140	S.melongena	1262239	1208748	0.958	28269	0.92	2038	0.066	413	0.013	58.7	11	0
GPE001380	S.melongena	408222	390609	0.957	28382	0.924	1942	0.063	407	0.013	49.1	0	0
GPE001640	S.melongena	339528	328760	0.968	28602	0.931	1730	0.056	390	0.013	46.9	9	0
GPE002830	S.melongena	797074	769574	0.965	28469	0.926	1874	0.061	386	0.013	55.1	2	0
GPE022380	S.melongena	711487	683172	0.96	28496	0.928	1838	0.06	386	0.013	50.8	11	0
GPE020720	S.melongena	275712	265702	0.964	28264	0.92	2034	0.066	425	0.014	40.5	8	0
GPE022720	S.melongena	586208	566317	0.966	28230	0.919	2059	0.067	434	0.014	49.2	8	0
GPE022730	S.melongena	621800	596457	0.959	28371	0.923	1922	0.063	436	0.014	50.3	2	0
GPE020770	S.melongena	498741	482161	0.967	28159	0.916	2097	0.068	472	0.015	48.6	3	0
GPE022290	S.melongena	323590	312270	0.965	28298	0.921	1965	0.064	468	0.015	44.2	0	0
GPE022510	S.melongena	535785	515092	0.961	28311	0.921	1945	0.063	475	0.015	49.3	0	0
GPE001110	S.melongena	829793	799118	0.963	28378	0.924	1845	0.06	505	0.016	55.2	3	0
GPE001790	S.melongena	591317	564065	0.954	28298	0.921	1934	0.063	499	0.016	53.1	0	0
GPE002670	S.melongena	839932	804465	0.958	29591	0.963	643	0.021	495	0.016	53.4	2	0
GPE020920	S.melongena	625961	602804	0.963	28288	0.921	1947	0.063	491	0.016	50.2	5	0
GPE001120	S.melongena	700174	668936	0.955	28373	0.923	1844	0.06	509	0.017	54.5	5	0
GPE002710	S.melongena	1761053	1686906	0.958	29524	0.961	667	0.022	528	0.017	56.2	12	0
GPE022120	S.melongena	359429	345472	0.961	28310	0.921	1911	0.062	509	0.017	45.1	1	0
GPE022910	S.melongena	355236	341336	0.961	28248	0.919	1915	0.062	568	0.018	43.5	0	0
GPE001180	S.melongena	1246824	1199445	0.962	28436	0.925	1707	0.056	586	0.019	58.3	2	0
GPE022520	S.melongena	556408	534503	0.961	28532	0.928	1619	0.053	579	0.019	49.4	1	0
GPE001100	S.melongena	390582	376959	0.965	28163	0.917	1946	0.063	608	0.02	49.1	14	0
GPE020890	S.melongena	375996	362159	0.963	28158	0.916	1971	0.064	600	0.02	45.5	2	0
GPE001510	S.melongena	1012950	978358	0.966	28638	0.932	1431	0.047	656	0.021	56.8	6	0
GPE001660	S.melongena	1278411	1236101	0.967	28089	0.914	1964	0.064	674	0.022	58.9	4	0
GPE002900	S.melongena	724129	698164	0.964	28969	0.943	1011	0.033	749	0.024	54.3	2	0
GPE021230	S.melongena	280862	268277	0.955	28315	0.922	1645	0.054	764	0.025	39.2	7	0
GPE022410	S.melongena	342510	330005	0.963	28135	0.916	1744	0.057	852	0.028	44.7	0	0
GPE001400	S.melongena	1030946	994238	0.964	28180	0.917	1661	0.054	887	0.029	57	3	0
GPE022310	S.melongena	427970	413966	0.967	28332	0.922	1511	0.049	885	0.029	48	3	0
GPE001200	S.melongena	1040430	999523	0.961	28144	0.916	1544	0.05	1040	0.034	57.1	3	0
GPE022860	S.melongena	229928	220846	0.961	28101	0.914	1599	0.052	1031	0.034	35.3	0	0
GPE022200	S.melongena	505556	487990	0.965	28382	0.924	1256	0.041	1086	0.035	48.3	7	0
GPE022390	S.melongena	442141	423808	0.959	28061	0.913	1414	0.046	1254	0.041	47.7	2	0
GPE022320	S.melongena	374270	359348	0.96	27701	0.901	1224	0.04	1805	0.059	44.3	1	0
GPE000520	S.melongena	615417	594087	0.965	28144	0.916	741	0.024	1844	0.06	53.4	2	0
GPE022280	S.melongena	345807	333773	0.965	27733	0.903	1082	0.035	1914	0.062	44.9	2	0
GPE002860	S.melongena	595687	576407	0.968	27919	0.908	767	0.025	2045	0.067	53	0	0
GPE002980	S.melongena	878391	839081	0.955	27773	0.904	849	0.028	2106	0.069	55.7	3	0
GPE022790	S.melongena	543485	523934	0.964	27819	0.905	780	0.025	2130	0.069	48.6	2	0
GPE002910	S.melongena	1035897	991171	0.957	27566	0.897	1025	0.033	2138	0.07	56.9	2	0
GPE001010	S.melongena	649916	621733	0.957	27859	0.907	687	0.022	2184	0.071	53.7	1	0
GPE021200	S.melongena	499903	478912	0.958	27201	0.885	1353	0.044	2177	0.071	48.4	0	0
GPE022080	S.melongena	385719	371071	0.962	27546	0.896	1000	0.033	2184	0.071	46	1	0
GPE000460	S.melongena	789337	754629	0.956	28749	0.936	1916	0.062	46	0.001	55.2	20	0.001
GPE000500	S.melongena	689273	661748	0.96	29831	0.971	838	0.027	46	0.001	54.5	16	0.001
GPE000630	S.melongena	537867	516409	0.96	29574	0.963	1093	0.036	44	0.001	52.6	20	0.001
GPE001410	S.melongena	587243	567511	0.966	28685	0.934	1980	0.064	46	0.001	52.8	20	0.001
GPE001710	S.melongena	442866	428185	0.967	29467	0.959	1208	0.039	36	0.001	50.7	20	0.001
GPE001730	S.melongena	450511	433719	0.963	29695	0.967	978	0.032	39	0.001	51.2	19	0.001
GPE001750	S.melongena	589197	568459	0.965	28841	0.94	1814	0.059	38	0.001	53	38	0.001
GPE020590	S.melongena	316298	305485	0.966	28554	0.93	2111	0.069	45	0.001	43.8	21	0.001
GPE022800	S.melongena	312711	302541	0.967	28673	0.934	2003	0.065	39	0.001	43.7	16	0.001
GPE000410	S.melongena	820693	793427	0.967	29079	0.947	1569	0.051	54	0.002	55.7	29	0.001
GPE000930	S.melongena	475074	457640	0.963	28438	0.926	2206	0.072	52	0.002	51.2	35	0.001
GPE000970	S.melongena	708718	680400	0.96	28686	0.934	1972	0.064	55	0.002	54.4	18	0.001
GPE001080	S.melongena	1021611	977972	0.957	28890	0.941	1776	0.058	47	0.002	56.9	18	0.001
GPE001570	S.melongena	665522	642854	0.966	28674	0.934	1985	0.065	54	0.002	54	18	0.001
GPE001610	S.melongena	748815	723865	0.967	28690	0.934	1969	0.064	50	0.002	54.6	22	0.001
GPE001680	S.melongena	2458706	2374988	0.966	28394	0.925	2271	0.074	47	0.002	68.8	19	0.001
GPE001700	S.melongena	604980	584336	0.966	29469	0.96	1188	0.039	49	0.002	53.3	25	0.001
GPE001870	S.melongena	831720	792267	0.953	28895	0.941	1744	0.057	63	0.002	55.6	29	0.001
GPE001890	S.melongena	508111	479940	0.945	28809	0.938	1843	0.06	51	0.002	51.9	28	0.001
GPE001920	S.melongena	523131	496186	0.948	28841	0.939	1813	0.059	57	0.002	52.1	20	0.001
GPE003380	S.melongena	896889	855779	0.954	28491	0.928	2150	0.07	64	0.002	55.6	26	0.001
GPE003460	S.melongena	845339	806510	0.954	28431	0.926	2203	0.072	64	0.002	55.4	33	0.001
GPE020600	S.melongena	620146	597532	0.964	28550	0.93	2108	0.069	53	0.002	50.3	20	0.001
GPE020630	S.melongena	285985	275493	0.963	28627	0.932	2023	0.066	62	0.002	41.8	19	0.001
GPE021650	S.melongena	423317	406888	0.961	28691	0.934	1946	0.063	70	0.002	45.6	24	0.001
GPE022560	S.melongena	496435	477008	0.961	28724	0.936	1915	0.062	60	0.002	48.7	32	0.001
GPE023010	S.melongena	392557	375296	0.956	28630	0.932	2020	0.066	54	0.002	46.6	27	0.001
GPE059490	S.melongena	441750	426997	0.967	28155	0.917	2490	0.081	69	0.002	48.5	17	0.001
GPE000620	S.melongena	543723	524713	0.965	30070	0.979	547	0.018	95	0.003	52.9	19	0.001
GPE001430	S.melongena	946755	916529	0.968	28285	0.921	2326	0.076	95	0.003	56	25	0.001
GPE001860	S.melongena	375354	357136	0.951	28657	0.933	1965	0.064	84	0.003	48.3	25	0.001
GPE001910	S.melongena	437181	417120	0.954	28640	0.933	1967	0.064	83	0.003	50.5	41	0.001
GPE002760	S.melongena	955380	912355	0.955	29608	0.964	1005	0.033	99	0.003	56.7	19	0.001
GPE059520	S.melongena	362378	348857	0.963	28440	0.926	2191	0.071	77	0.003	45.5	23	0.001
GPE002870	S.melongena	948093	913044	0.963	28452	0.926	2137	0.07	121	0.004	55.7	21	0.001
GPE000870	S.melongena	106912	102835	0.962	28624	0.932	1928	0.063	157	0.005	18.3	22	0.001
GPE002570	S.melongena	468354	446982	0.954	28450	0.926	2124	0.069	141	0.005	51.3	16	0.001
GPE002700	S.melongena	438442	420301	0.959	29721	0.968	819	0.027	168	0.005	50.5	23	0.001
GPE002780	S.melongena	956405	911610	0.953	28444	0.926	2102	0.068	159	0.005	56.5	26	0.001
GPE020550	S.melongena	119814	115129	0.961	28558	0.93	2010	0.065	141	0.005	19.1	22	0.001
GPE001840	S.melongena	429244	415485	0.968	28860	0.94	1634	0.053	210	0.007	50.3	27	0.001
GPE002770	S.melongena	974991	943853	0.968	28606	0.932	1876	0.061	223	0.007	56.6	26	0.001
GPE020750	S.melongena	285420	275689	0.966	28587	0.931	1920	0.063	206	0.007	41.8	18	0.001
GPE001170	S.melongena	1028558	987388	0.96	28505	0.928	1948	0.063	262	0.009	56.9	16	0.001
GPE002850	S.melongena	715524	686576	0.96	28592	0.931	1851	0.06	269	0.009	54.3	19	0.001
GPE059540	S.melongena	551179	533493	0.968	28435	0.926	1950	0.063	328	0.011	52.6	18	0.001
GPE021110	S.melongena	451148	434246	0.963	28415	0.925	1931	0.063	368	0.012	48.1	17	0.001
GPE022710	S.melongena	224760	217227	0.966	28574	0.931	1656	0.054	463	0.015	35.6	38	0.001
GPE002950	S.melongena	702175	677277	0.965	28282	0.921	1926	0.063	507	0.017	54.4	16	0.001
GPE001620	S.melongena	244651	234588	0.959	28324	0.922	1442	0.047	940	0.031	38.6	25	0.001
GPE001190	S.melongena	841560	808707	0.961	28800	0.939	1814	0.059	56	0.002	55.3	61	0.002
GPE001650	S.melongena	69062	66179	0.958	28339	0.925	1781	0.058	506	0.017	11.5	105	0.003
GPE003420	S.melongena	3136	2834	0.904	8696	0.972	192	0.021	61	0.007	0.5	21782	0.709
GPE000530	S.melongena	1551	1436	0.926	4668	0.98	79	0.017	14	0.003	0.3	25970	0.845
GPE003600	S.paniculatum	339806	320664	0.944	23410	0.774	4844	0.16	1981	0.066	41.4	496	0.016
GPE003590	S.paniculatum	248725	234225	0.942	23306	0.772	4841	0.16	2056	0.068	35.5	528	0.017
GPE003720	S.sisymbriifolium	141745	128951	0.91	12036	0.506	9499	0.4	2231	0.094	19.1	6965	0.227
GPE059450	S.tomentosum	2183929	2051095	0.939	22321	0.741	7322	0.243	484	0.016	59.5	604	0.02
GPE059470	S.tomentosum	893831	839623	0.939	22076	0.739	7333	0.245	471	0.016	48	851	0.028
GPE003580	S.tomentosum	302101	282647	0.936	21919	0.738	7220	0.243	552	0.019	40.9	1040	0.034
GPE003680	S.torvum	210157	187379	0.892	13529	0.559	9199	0.38	1474	0.061	25.8	6529	0.212

## Sheet: Supplementary Table S4
Supplementary Table S4: Robustness of the final tomato SPET assay using DNAs prepared with different methods and by different laboratories
Laboratory	DNA preparation method	Quality filtered reads/sample (thousands)	Mapping %
A	CTAB modified*	391±171	94±1
B	Qiagen**	536±136	89±8
C	LGC***	379±107	92±1
D	LGC***	721±197	93±1
*unpublished
**DNeasy 96 plant kit, cat. n. 69181
***Sbeadex maxi plant kit, cat. n. NAP41620

## Sheet: Supplementary Table S5
Supplementary Table S5: PIC values of the whole SNPs identified in the tomato genepool
Site Number	Site Name	Chromosome	Physical Position	PIC	Major Allele Frequency	Minor Allele Frequency	Allele 3 Frequency	Allele 4 Frequency	Allele 5 Frequency	Allele 6 Frequency
0	SSL2.50CH01_47132	SL2.50CH01	47132	0.08	G	A	0.95844	0.04156	0	0	0	0
1	SSL2.50CH01_65869	SL2.50CH01	65869	0.171	C	T	0.90578	0.09422	0	0	0	0
2	SSL2.50CH01_65902	SL2.50CH01	65902	0.086	A	T	0.95477	0.04523	0	0	0	0
3	SSL2.50CH01_102276	SL2.50CH01	102276	0.17	A	G	0.90602	0.09398	0	0	0	0
4	SSL2.50CH01_124802	SL2.50CH01	124802	0.061	C	T	0.96867	0.03133	0	0	0	0
5	SSL2.50CH01_124806	SL2.50CH01	124806	0.029	G	A	0.98533	0.01467	0	0	0	0
6	SSL2.50CH01_124814	SL2.50CH01	124814	0.084	C	T	0.95614	0.04386	0	0	0	0
7	SSL2.50CH01_124864	SL2.50CH01	124864	0.01	A	G	0.99499	0.00501	0	0	0	0
8	SSL2.50CH01_165212	SL2.50CH01	165212	0.035	C	G	0.98223	0.01777	0	0	0	0
9	SSL2.50CH01_165222	SL2.50CH01	165222	0.092	G	T	0.95165	0.04835	0	0	0	0
10	SSL2.50CH01_165240	SL2.50CH01	165240	0.066	T	C	0.96591	0.03409	0	0	0	0
11	SSL2.50CH01_165273	SL2.50CH01	165273	0.042	T	C	0.97848	0.02152	0	0	0	0
12	SSL2.50CH01_211023	SL2.50CH01	211023	0.479	A	G	0.60178	0.39822	0	0	0	0
13	SSL2.50CH01_241397	SL2.50CH01	241397	0.089	A	G	0.9534	0.0466	0	0	0	0
14	SSL2.50CH01_241420	SL2.50CH01	241420	0.167	T	A	0.90811	0.09189	0	0	0	0
15	SSL2.50CH01_241464	SL2.50CH01	241464	0.101	G	C	0.94703	0.05039	0.00258	0	0	0
16	SSL2.50CH01_241474	SL2.50CH01	241474	0.005	G	A	0.99747	0.00253	0	0	0	0
17	SSL2.50CH01_276202	SL2.50CH01	276202	0.111	G	A	0.94095	0.05905	0	0	0	0
18	SSL2.50CH01_276257	SL2.50CH01	276257	0.041	A	T	0.97911	0.02089	0	0	0	0
19	SSL2.50CH01_309021	SL2.50CH01	309021	0.077	A	T	0.95974	0.04026	0	0	0	0
20	SSL2.50CH01_309060	SL2.50CH01	309060	0.013	C	G	0.99324	0.00676	0	0	0	0
21	SSL2.50CH01_309061	SL2.50CH01	309061	0.064	G	T	0.96701	0.03299	0	0	0	0
22	SSL2.50CH01_309074	SL2.50CH01	309074	0.073	T	A	0.96193	0.03807	0	0	0	0
23	SSL2.50CH01_339312	SL2.50CH01	339312	0.414	T	C	0.70729	0.29271	0	0	0	0
24	SSL2.50CH01_339336	SL2.50CH01	339336	0.049	T	C	0.97487	0.02513	0	0	0	0
25	SSL2.50CH01_369759	SL2.50CH01	369759	0.03	C	A	0.98489	0.01511	0	0	0	0
26	SSL2.50CH01_416855	SL2.50CH01	416855	0.454	A	G	0.65152	0.34848	0	0	0	0
27	SSL2.50CH01_416858	SL2.50CH01	416858	0.05	A	C	0.97462	0.02284	0.00254	0	0	0
28	SSL2.50CH01_416900	SL2.50CH01	416900	0.037	C	T	0.98106	0.01894	0	0	0	0
29	SSL2.50CH01_416902	SL2.50CH01	416902	0.427	T	C	0.69066	0.30934	0	0	0	0
30	SSL2.50CH01_481922	SL2.50CH01	481922	0.169	A	T	0.90704	0.09296	0	0	0	0
31	SSL2.50CH01_481959	SL2.50CH01	481959	0.02	C	T	0.98995	0.01005	0	0	0	0
32	SSL2.50CH01_514472	SL2.50CH01	514472	0.122	G	C	0.93467	0.06533	0	0	0	0
33	SSL2.50CH01_514529	SL2.50CH01	514529	0.165	A	G	0.90955	0.09045	0	0	0	0
34	SSL2.50CH01_530378	SL2.50CH01	530378	0.127	C	A	0.93205	0.06795	0	0	0	0
35	SSL2.50CH01_530429	SL2.50CH01	530429	0.13	A	G	0.93059	0.06041	0.009	0	0	0
36	SSL2.50CH01_530438	SL2.50CH01	530438	0.04	G	T	0.97959	0.02041	0	0	0	0
37	SSL2.50CH01_597385	SL2.50CH01	597385	0.143	G	T	0.92278	0.07722	0	0	0	0
38	SSL2.50CH01_597413	SL2.50CH01	597413	0.08	A	C	0.95844	0.04156	0	0	0	0
39	SSL2.50CH01_665613	SL2.50CH01	665613	0.12	C	T	0.93609	0.06391	0	0	0	0
40	SSL2.50CH01_665639	SL2.50CH01	665639	0.037	C	T	0.9812	0.0188	0	0	0	0
41	SSL2.50CH01_730153	SL2.50CH01	730153	0.003	T	C	0.99874	0.00126	0	0	0	0
42	SSL2.50CH01_730154	SL2.50CH01	730154	0.32	T	C	0.79975	0.20025	0	0	0	0
43	SSL2.50CH01_934765	SL2.50CH01	934765	0.159	G	A	0.9131	0.0869	0	0	0	0
44	SSL2.50CH01_951133	SL2.50CH01	951133	0.16	A	G	0.91206	0.08794	0	0	0	0
45	SSL2.50CH01_951144	SL2.50CH01	951144	0.01	C	T	0.99497	0.00503	0	0	0	0
46	SSL2.50CH01_981640	SL2.50CH01	981640	0.071	G	A	0.96329	0.03671	0	0	0	0
47	SSL2.50CH01_981660	SL2.50CH01	981660	0.04	A	T	0.9797	0.0203	0	0	0	0
48	SSL2.50CH01_981690	SL2.50CH01	981690	0.04	C	T	0.97978	0.02022	0	0	0	0
49	SSL2.50CH01_1030396	SL2.50CH01	1030396	0.002	G	A	0.99875	0.00125	0	0	0	0
50	SSL2.50CH01_1030434	SL2.50CH01	1030434	0.143	G	A	0.92231	0.07769	0	0	0	0
51	SSL2.50CH01_1030448	SL2.50CH01	1030448	0.007	G	A	0.99624	0.00376	0	0	0	0
52	SSL2.50CH01_1030474	SL2.50CH01	1030474	0.006	A	G	0.99687	0.00313	0	0	0	0
53	SSL2.50CH01_1047963	SL2.50CH01	1047963	0.167	G	A	0.90829	0.09171	0	0	0	0
54	SSL2.50CH01_1048026	SL2.50CH01	1048026	0.008	A	G	0.99595	0.00405	0	0	0	0
55	SSL2.50CH01_1048037	SL2.50CH01	1048037	0.005	A	C	0.9973	0.0027	0	0	0	0
56	SSL2.50CH01_1048053	SL2.50CH01	1048053	0.114	G	A	0.93928	0.06072	0	0	0	0
57	SSL2.50CH01_1064992	SL2.50CH01	1064992	0.329	G	A	0.79219	0.20781	0	0	0	0
58	SSL2.50CH01_1065056	SL2.50CH01	1065056	0.082	A	T	0.95707	0.04293	0	0	0	0
59	SSL2.50CH01_1065079	SL2.50CH01	1065079	0.003	G	C	0.99874	0.00126	0	0	0	0
60	SSL2.50CH01_1065081	SL2.50CH01	1065081	0.003	C	T	0.99874	0.00126	0	0	0	0
61	SSL2.50CH01_1065084	SL2.50CH01	1065084	0.042	T	C	0.97859	0.02141	0	0	0	0
62	SSL2.50CH01_1082191	SL2.50CH01	1082191	0.015	A	G	0.99242	0.00758	0	0	0	0
63	SSL2.50CH01_1082264	SL2.50CH01	1082264	0.015	A	G	0.99235	0.00765	0	0	0	0
64	SSL2.50CH01_1198241	SL2.50CH01	1198241	0.008	T	C	0.99593	0.00407	0	0	0	0
65	SSL2.50CH01_1198245	SL2.50CH01	1198245	0.106	A	G	0.94359	0.05641	0	0	0	0
66	SSL2.50CH01_1198273	SL2.50CH01	1198273	0.028	T	A	0.98593	0.01407	0	0	0	0
67	SSL2.50CH01_1198274	SL2.50CH01	1198274	0.025	C	A	0.98721	0.01279	0	0	0	0
68	SSL2.50CH01_1217274	SL2.50CH01	1217274	0.158	T	A	0.91332	0.08668	0	0	0	0
69	SSL2.50CH01_1217284	SL2.50CH01	1217284	0.183	A	G	0.89824	0.10176	0	0	0	0
70	SSL2.50CH01_1367269	SL2.50CH01	1367269	0.105	A	T	0.9443	0.0557	0	0	0	0
71	SSL2.50CH01_1390838	SL2.50CH01	1390838	0.012	A	T	0.99372	0.00628	0	0	0	0
72	SSL2.50CH01_1390843	SL2.50CH01	1390843	0.142	A	C	0.92337	0.07663	0	0	0	0
73	SSL2.50CH01_1390890	SL2.50CH01	1390890	0.051	T	A	0.97362	0.02638	0	0	0	0
74	SSL2.50CH01_1425858	SL2.50CH01	1425858	0.022	T	C	0.98864	0.01136	0	0	0	0
75	SSL2.50CH01_1425903	SL2.50CH01	1425903	0.126	T	A	0.93359	0.04818	0.01823	0	0	0
76	SSL2.50CH01_1443413	SL2.50CH01	1443413	0.051	A	G	0.97368	0.02632	0	0	0	0
77	SSL2.50CH01_1443418	SL2.50CH01	1443418	0.077	T	G	0.9599	0.0401	0	0	0	0
78	SSL2.50CH01_1443423	SL2.50CH01	1443423	0.16	A	G	0.91479	0.04511	0.0401	0	0	0
79	SSL2.50CH01_1506634	SL2.50CH01	1506634	0.054	C	T	0.97208	0.02792	0	0	0	0
80	SSL2.50CH01_1506642	SL2.50CH01	1506642	0.124	A	T	0.93358	0.06642	0	0	0	0
81	SSL2.50CH01_1506693	SL2.50CH01	1506693	0.022	T	G	0.98869	0.01131	0	0	0	0
82	SSL2.50CH01_1506725	SL2.50CH01	1506725	0.073	G	T	0.96212	0.03788	0	0	0	0
83	SSL2.50CH01_1552628	SL2.50CH01	1552628	0.04	C	T	0.9798	0.0202	0	0	0	0
84	SSL2.50CH01_1552631	SL2.50CH01	1552631	0.045	C	T	0.97722	0.02278	0	0	0	0
85	SSL2.50CH01_1552641	SL2.50CH01	1552641	0.035	C	T	0.98228	0.01772	0	0	0	0
86	SSL2.50CH01_1552713	SL2.50CH01	1552713	0.013	T	A	0.99364	0.00509	0.00127	0	0	0
87	SSL2.50CH01_1649561	SL2.50CH01	1649561	0.049	C	T	0.97487	0.02513	0	0	0	0
88	SSL2.50CH01_1711997	SL2.50CH01	1711997	0.161	C	A	0.91184	0.08816	0	0	0	0
89	SSL2.50CH01_1712027	SL2.50CH01	1712027	0.008	C	A	0.99622	0.00378	0	0	0	0
90	SSL2.50CH01_1744442	SL2.50CH01	1744442	0.039	G	A	0.97985	0.02015	0	0	0	0
91	SSL2.50CH01_1744449	SL2.50CH01	1744449	0.101	C	A	0.94684	0.05316	0	0	0	0
92	SSL2.50CH01_1744479	SL2.50CH01	1744479	0.044	T	C	0.97733	0.02267	0	0	0	0
93	SSL2.50CH01_1801067	SL2.50CH01	1801067	0.042	T	C	0.97864	0.02136	0	0	0	0
94	SSL2.50CH01_1801072	SL2.50CH01	1801072	0.084	G	T	0.95614	0.04386	0	0	0	0
95	SSL2.50CH01_1801073	SL2.50CH01	1801073	0.002	T	C	0.99875	0.00125	0	0	0	0
96	SSL2.50CH01_1801075	SL2.50CH01	1801075	0.044	C	T	0.97744	0.0213	0.00125	0	0	0
97	SSL2.50CH01_1801080	SL2.50CH01	1801080	0.003	G	A	0.99874	0.00126	0	0	0	0
98	SSL2.50CH01_1801139	SL2.50CH01	1801139	0.084	C	T	0.95603	0.04397	0	0	0	0
99	SSL2.50CH01_1820852	SL2.50CH01	1820852	0.166	A	G	0.90852	0.09148	0	0	0	0
100	SSL2.50CH01_1904070	SL2.50CH01	1904070	0.155	A	G	0.9154	0.0846	0	0	0	0
101	SSL2.50CH01_1904118	SL2.50CH01	1904118	0.025	C	G	0.98737	0.01263	0	0	0	0
102	SSL2.50CH01_1904140	SL2.50CH01	1904140	0.047	T	G	0.97601	0.02399	0	0	0	0
103	SSL2.50CH01_1939531	SL2.50CH01	1939531	0.017	C	T	0.99121	0.00503	0.00377	0	0	0
104	SSL2.50CH01_1939537	SL2.50CH01	1939537	0.157	G	A	0.91436	0.08564	0	0	0	0
105	SSL2.50CH01_1939571	SL2.50CH01	1939571	0.005	A	G	0.99731	0.00269	0	0	0	0
106	SSL2.50CH01_1939586	SL2.50CH01	1939586	0.125	C	T	0.93325	0.06675	0	0	0	0
107	SSL2.50CH01_1955432	SL2.50CH01	1955432	0.08	C	A	0.95844	0.04156	0	0	0	0
108	SSL2.50CH01_2062209	SL2.50CH01	2062209	0.039	T	C	0.97985	0.02015	0	0	0	0
109	SSL2.50CH01_2062228	SL2.50CH01	2062228	0.163	G	A	0.91058	0.08942	0	0	0	0
110	SSL2.50CH01_2062239	SL2.50CH01	2062239	0.039	T	C	0.97985	0.02015	0	0	0	0
111	SSL2.50CH01_2096031	SL2.50CH01	2096031	0.144	A	T	0.92191	0.07809	0	0	0	0
112	SSL2.50CH01_2111830	SL2.50CH01	2111830	0.072	C	T	0.96282	0.03718	0	0	0	0
113	SSL2.50CH01_2111856	SL2.50CH01	2111856	0.045	A	G	0.97716	0.02284	0	0	0	0
114	SSL2.50CH01_2111864	SL2.50CH01	2111864	0.008	G	A	0.99619	0.00381	0	0	0	0
115	SSL2.50CH01_2127040	SL2.50CH01	2127040	0.027	C	G	0.98608	0.01392	0	0	0	0
116	SSL2.50CH01_2127062	SL2.50CH01	2127062	0.033	G	A	0.98342	0.01658	0	0	0	0
117	SSL2.50CH01_2127111	SL2.50CH01	2127111	0.028	C	T	0.98597	0.01403	0	0	0	0
118	SSL2.50CH01_2127129	SL2.50CH01	2127129	0.04	A	G	0.97959	0.02041	0	0	0	0
119	SSL2.50CH01_2171966	SL2.50CH01	2171966	0.17	T	G	0.90602	0.09398	0	0	0	0
120	SSL2.50CH01_2203245	SL2.50CH01	2203245	0.135	T	C	0.92714	0.07286	0	0	0	0
121	SSL2.50CH01_2203288	SL2.50CH01	2203288	0.139	A	G	0.92462	0.07538	0	0	0	0
122	SSL2.50CH01_2203328	SL2.50CH01	2203328	0.047	T	C	0.97583	0.02417	0	0	0	0
123	SSL2.50CH01_2218618	SL2.50CH01	2218618	0.146	G	A	0.92085	0.07915	0	0	0	0
124	SSL2.50CH01_2241707	SL2.50CH01	2241707	0.049	A	G	0.97494	0.02506	0	0	0	0
125	SSL2.50CH01_2241746	SL2.50CH01	2241746	0.167	A	G	0.90829	0.09171	0	0	0	0
126	SSL2.50CH01_2259594	SL2.50CH01	2259594	0.468	T	C	0.6272	0.3728	0	0	0	0
127	SSL2.50CH01_2259620	SL2.50CH01	2259620	0.067	T	G	0.96547	0.02174	0.01279	0	0	0
128	SSL2.50CH01_2343319	SL2.50CH01	2343319	0.376	C	T	0.74874	0.25126	0	0	0	0
129	SSL2.50CH01_2343408	SL2.50CH01	2343408	0.051	A	T	0.97362	0.02638	0	0	0	0
130	SSL2.50CH01_2431577	SL2.50CH01	2431577	0.007	G	A	0.99624	0.00376	0	0	0	0
131	SSL2.50CH01_2431597	SL2.50CH01	2431597	0.063	A	G	0.96734	0.03266	0	0	0	0
132	SSL2.50CH01_2431655	SL2.50CH01	2431655	0.006	C	A	0.99714	0.00286	0	0	0	0
133	SSL2.50CH01_2431661	SL2.50CH01	2431661	0.495	T	A	0.55913	0.4383	0.00257	0	0	0
134	SSL2.50CH01_2524216	SL2.50CH01	2524216	0.168	A	G	0.90727	0.09273	0	0	0	0
135	SSL2.50CH01_2524228	SL2.50CH01	2524228	0.032	T	A	0.98371	0.01629	0	0	0	0
136	SSL2.50CH01_2524242	SL2.50CH01	2524242	0.039	C	T	0.97989	0.02011	0	0	0	0
137	SSL2.50CH01_2569887	SL2.50CH01	2569887	0.148	T	C	0.9194	0.0806	0	0	0	0
138	SSL2.50CH01_2569950	SL2.50CH01	2569950	0.056	T	C	0.97103	0.02897	0	0	0	0
139	SSL2.50CH01_2624403	SL2.50CH01	2624403	0.162	T	A	0.9108	0.0892	0	0	0	0
140	SSL2.50CH01_2624480	SL2.50CH01	2624480	0.047	G	C	0.97589	0.02411	0	0	0	0
141	SSL2.50CH01_2722381	SL2.50CH01	2722381	0.063	A	C	0.96742	0.03258	0	0	0	0
142	SSL2.50CH01_2722388	SL2.50CH01	2722388	0.181	A	T	0.8995	0.1005	0	0	0	0
143	SSL2.50CH01_2770499	SL2.50CH01	2770499	0.075	G	C	0.96115	0.03885	0	0	0	0
144	SSL2.50CH01_2854926	SL2.50CH01	2854926	0.023	T	A	0.98846	0.01154	0	0	0	0
145	SSL2.50CH01_2854938	SL2.50CH01	2854938	0.1	G	A	0.9473	0.0527	0	0	0	0
146	SSL2.50CH01_2854998	SL2.50CH01	2854998	0.027	A	G	0.9863	0.0137	0	0	0	0
147	SSL2.50CH01_2870658	SL2.50CH01	2870658	0.16	T	C	0.91206	0.08794	0	0	0	0
148	SSL2.50CH01_2870711	SL2.50CH01	2870711	0.075	A	G	0.96106	0.03894	0	0	0	0
149	SSL2.50CH01_2936823	SL2.50CH01	2936823	0.167	T	C	0.90829	0.09171	0	0	0	0
150	SSL2.50CH01_2936889	SL2.50CH01	2936889	0.044	G	A	0.97739	0.02261	0	0	0	0
151	SSL2.50CH01_2995075	SL2.50CH01	2995075	0.054	T	A	0.97236	0.02764	0	0	0	0
152	SSL2.50CH01_2995092	SL2.50CH01	2995092	0.051	G	A	0.97362	0.02638	0	0	0	0
153	SSL2.50CH01_2995155	SL2.50CH01	2995155	0.042	G	A	0.97859	0.02141	0	0	0	0
154	SSL2.50CH01_2995157	SL2.50CH01	2995157	0.096	G	A	0.94949	0.05051	0	0	0	0
155	SSL2.50CH01_3027230	SL2.50CH01	3027230	0.088	A	T	0.95363	0.04637	0	0	0	0
156	SSL2.50CH01_3027231	SL2.50CH01	3027231	0.039	A	G	0.97995	0.02005	0	0	0	0
157	SSL2.50CH01_3027256	SL2.50CH01	3027256	0.046	C	A	0.97619	0.02381	0	0	0	0
158	SSL2.50CH01_3043427	SL2.50CH01	3043427	0.174	C	T	0.90351	0.09649	0	0	0	0
159	SSL2.50CH01_3043478	SL2.50CH01	3043478	0.079	T	A	0.95865	0.04135	0	0	0	0
160	SSL2.50CH01_3043485	SL2.50CH01	3043485	0.154	G	C	0.91583	0.08417	0	0	0	0
161	SSL2.50CH01_3106357	SL2.50CH01	3106357	0.135	A	C	0.92732	0.07268	0	0	0	0
162	SSL2.50CH01_3165197	SL2.50CH01	3165197	0.142	A	G	0.92337	0.07663	0	0	0	0
163	SSL2.50CH01_3165213	SL2.50CH01	3165213	0.047	A	G	0.97613	0.02387	0	0	0	0
164	SSL2.50CH01_3165217	SL2.50CH01	3165217	0.03	C	T	0.98457	0.01543	0	0	0	0
165	SSL2.50CH01_3165238	SL2.50CH01	3165238	0.03	G	T	0.98492	0.01508	0	0	0	0
166	SSL2.50CH01_3165254	SL2.50CH01	3165254	0.03	G	C	0.98492	0.01508	0	0	0	0
167	SSL2.50CH01_3165278	SL2.50CH01	3165278	0.005	T	A	0.99749	0.00251	0	0	0	0
168	SSL2.50CH01_3261838	SL2.50CH01	3261838	0.018	T	G	0.99107	0.00893	0	0	0	0
169	SSL2.50CH01_3261845	SL2.50CH01	3261845	0.085	G	A	0.95547	0.04453	0	0	0	0
170	SSL2.50CH01_3261904	SL2.50CH01	3261904	0.008	A	G	0.99618	0.00382	0	0	0	0
171	SSL2.50CH01_3303842	SL2.50CH01	3303842	0.082	G	C	0.95729	0.04271	0	0	0	0
172	SSL2.50CH01_3303855	SL2.50CH01	3303855	0.169	T	A	0.90704	0.09296	0	0	0	0
173	SSL2.50CH01_3303857	SL2.50CH01	3303857	0.042	C	A	0.97864	0.02136	0	0	0	0
174	SSL2.50CH01_3303861	SL2.50CH01	3303861	0.042	G	C	0.97864	0.02136	0	0	0	0
175	SSL2.50CH01_3303866	SL2.50CH01	3303866	0.008	G	A	0.99622	0.00378	0	0	0	0
176	SSL2.50CH01_3303936	SL2.50CH01	3303936	0.066	G	T	0.96608	0.03392	0	0	0	0
177	SSL2.50CH01_3485974	SL2.50CH01	3485974	0.134	G	A	0.92766	0.07234	0	0	0	0
178	SSL2.50CH01_3502184	SL2.50CH01	3502184	0.035	C	T	0.98237	0.01763	0	0	0	0
179	SSL2.50CH01_3502203	SL2.50CH01	3502203	0.005	G	A	0.99747	0.00253	0	0	0	0
180	SSL2.50CH01_3622231	SL2.50CH01	3622231	0.054	G	A	0.97229	0.02771	0	0	0	0
181	SSL2.50CH01_3622239	SL2.50CH01	3622239	0.068	G	T	0.96474	0.03526	0	0	0	0
182	SSL2.50CH01_3662955	SL2.50CH01	3662955	0.058	A	G	0.96992	0.03008	0	0	0	0
183	SSL2.50CH01_3677982	SL2.50CH01	3677982	0.127	T	C	0.9317	0.0683	0	0	0	0
184	SSL2.50CH01_3678016	SL2.50CH01	3678016	0.082	G	A	0.95718	0.04282	0	0	0	0
185	SSL2.50CH01_3725366	SL2.50CH01	3725366	0.022	C	T	0.98869	0.01131	0	0	0	0
186	SSL2.50CH01_3725370	SL2.50CH01	3725370	0.086	A	G	0.95477	0.04523	0	0	0	0
187	SSL2.50CH01_3725373	SL2.50CH01	3725373	0.014	T	C	0.99286	0.00714	0	0	0	0
188	SSL2.50CH01_3725396	SL2.50CH01	3725396	0.156	A	G	0.91457	0.08543	0	0	0	0
189	SSL2.50CH01_3881012	SL2.50CH01	3881012	0.192	T	A	0.89223	0.10777	0	0	0	0
190	SSL2.50CH01_3881084	SL2.50CH01	3881084	0.052	C	T	0.97355	0.02645	0	0	0	0
191	SSL2.50CH01_3897466	SL2.50CH01	3897466	0.102	T	C	0.94598	0.05402	0	0	0	0
192	SSL2.50CH01_3897473	SL2.50CH01	3897473	0.058	C	T	0.96985	0.03015	0	0	0	0
193	SSL2.50CH01_3897491	SL2.50CH01	3897491	0.012	T	C	0.99383	0.00617	0	0	0	0
194	SSL2.50CH01_3897502	SL2.50CH01	3897502	0.054	G	C	0.97236	0.02513	0.00126	0.00126	0	0
195	SSL2.50CH01_3897503	SL2.50CH01	3897503	0.052	G	A	0.97305	0.02695	0	0	0	0
196	SSL2.50CH01_3897514	SL2.50CH01	3897514	0.049	C	T	0.97487	0.02513	0	0	0	0
197	SSL2.50CH01_3897533	SL2.50CH01	3897533	0.04	T	A	0.9798	0.0202	0	0	0	0
198	SSL2.50CH01_3897548	SL2.50CH01	3897548	0.069	A	C	0.96456	0.03038	0.00506	0	0	0
199	SSL2.50CH01_4156535	SL2.50CH01	4156535	0.059	T	C	0.96977	0.03023	0	0	0	0
200	SSL2.50CH01_4156536	SL2.50CH01	4156536	0.394	G	C	0.73048	0.26952	0	0	0	0
201	SSL2.50CH01_4156584	SL2.50CH01	4156584	0.017	T	C	0.9913	0.0087	0	0	0	0
202	SSL2.50CH01_4156585	SL2.50CH01	4156585	0.011	G	A	0.99464	0.00536	0	0	0	0
203	SSL2.50CH01_4156588	SL2.50CH01	4156588	0.096	G	A	0.94958	0.05042	0	0	0	0
204	SSL2.50CH01_4369364	SL2.50CH01	4369364	0.086	A	T	0.95477	0.04523	0	0	0	0
205	SSL2.50CH01_4369402	SL2.50CH01	4369402	0.003	C	A	0.99846	0.00154	0	0	0	0
206	SSL2.50CH01_4462996	SL2.50CH01	4462996	0.171	T	C	0.90554	0.09446	0	0	0	0
207	SSL2.50CH01_4463011	SL2.50CH01	4463011	0.171	T	C	0.90554	0.09446	0	0	0	0
208	SSL2.50CH01_4479995	SL2.50CH01	4479995	0.175	T	C	0.90327	0.09673	0	0	0	0
209	SSL2.50CH01_4495067	SL2.50CH01	4495067	0.082	G	A	0.95729	0.04271	0	0	0	0
210	SSL2.50CH01_4521223	SL2.50CH01	4521223	0.122	G	A	0.93451	0.06549	0	0	0	0
211	SSL2.50CH01_4521224	SL2.50CH01	4521224	0.082	A	G	0.95718	0.04282	0	0	0	0
212	SSL2.50CH01_4521251	SL2.50CH01	4521251	0.073	C	T	0.96222	0.03778	0	0	0	0
213	SSL2.50CH01_4521278	SL2.50CH01	4521278	0.052	C	A	0.97355	0.02645	0	0	0	0
214	SSL2.50CH01_4594572	SL2.50CH01	4594572	0.054	G	A	0.97236	0.02638	0.00126	0	0	0
215	SSL2.50CH01_4594589	SL2.50CH01	4594589	0.144	C	A	0.92211	0.07789	0	0	0	0
216	SSL2.50CH01_4612820	SL2.50CH01	4612820	0.03	C	G	0.98473	0.01527	0	0	0	0
217	SSL2.50CH01_4657423	SL2.50CH01	4657423	0.008	A	G	0.99621	0.00379	0	0	0	0
218	SSL2.50CH01_4657425	SL2.50CH01	4657425	0.025	C	T	0.98737	0.01263	0	0	0	0
219	SSL2.50CH01_4657447	SL2.50CH01	4657447	0.01	G	A	0.99492	0.00508	0	0	0	0
220	SSL2.50CH01_4657460	SL2.50CH01	4657460	0.042	A	G	0.97843	0.02157	0	0	0	0
221	SSL2.50CH01_4657476	SL2.50CH01	4657476	0.042	T	C	0.97843	0.02157	0	0	0	0
222	SSL2.50CH01_4657498	SL2.50CH01	4657498	0.05	A	C	0.97455	0.01654	0.00763	0.00127	0	0
223	SSL2.50CH01_4975770	SL2.50CH01	4975770	0.098	T	G	0.9481	0.0519	0	0	0	0
224	SSL2.50CH01_4975802	SL2.50CH01	4975802	0.045	T	A	0.97692	0.02308	0	0	0	0
225	SSL2.50CH01_4975803	SL2.50CH01	4975803	0.045	T	A	0.97692	0.02308	0	0	0	0
226	SSL2.50CH01_4975804	SL2.50CH01	4975804	0.06	T	A	0.96915	0.02314	0.00771	0	0	0
227	SSL2.50CH01_4975845	SL2.50CH01	4975845	0.068	T	C	0.96494	0.03506	0	0	0	0
228	SSL2.50CH01_5078745	SL2.50CH01	5078745	0.049	G	A	0.97481	0.02519	0	0	0	0
229	SSL2.50CH01_5078749	SL2.50CH01	5078749	0.03	T	C	0.98454	0.01546	0	0	0	0
230	SSL2.50CH01_5153994	SL2.50CH01	5153994	0.008	A	T	0.996	0.004	0	0	0	0
231	SSL2.50CH01_5153996	SL2.50CH01	5153996	0.051	C	G	0.97368	0.02632	0	0	0	0
232	SSL2.50CH01_5153998	SL2.50CH01	5153998	0.015	T	C	0.99248	0.00752	0	0	0	0
233	SSL2.50CH01_5154013	SL2.50CH01	5154013	0.088	C	G	0.95363	0.04637	0	0	0	0
234	SSL2.50CH01_5154029	SL2.50CH01	5154029	0.056	A	G	0.97103	0.02897	0	0	0	0
235	SSL2.50CH01_5154083	SL2.50CH01	5154083	0.052	C	T	0.97348	0.02652	0	0	0	0
236	SSL2.50CH01_5692244	SL2.50CH01	5692244	0.059	G	A	0.96931	0.03069	0	0	0	0
237	SSL2.50CH01_5692264	SL2.50CH01	5692264	0.013	A	G	0.99359	0.00641	0	0	0	0
238	SSL2.50CH01_6309451	SL2.50CH01	6309451	0.003	A	C	0.99846	0.00154	0	0	0	0
239	SSL2.50CH01_6309461	SL2.50CH01	6309461	0.023	G	A	0.98831	0.01169	0	0	0	0
240	SSL2.50CH01_6309473	SL2.50CH01	6309473	0.009	G	T	0.9954	0.0046	0	0	0	0
241	SSL2.50CH01_6309476	SL2.50CH01	6309476	0.022	C	A	0.98869	0.01131	0	0	0	0
242	SSL2.50CH01_6309514	SL2.50CH01	6309514	0.089	A	C	0.9534	0.0466	0	0	0	0
243	SSL2.50CH01_6615971	SL2.50CH01	6615971	0.236	C	T	0.86307	0.13693	0	0	0	0
244	SSL2.50CH01_6615986	SL2.50CH01	6615986	0.006	A	G	0.99691	0.00309	0	0	0	0
245	SSL2.50CH01_6616007	SL2.50CH01	6616007	0.044	C	T	0.97739	0.02261	0	0	0	0
246	SSL2.50CH01_7594018	SL2.50CH01	7594018	0.36	T	C	0.76448	0.23552	0	0	0	0
247	SSL2.50CH01_7594064	SL2.50CH01	7594064	0.07	T	G	0.96348	0.03652	0	0	0	0
248	SSL2.50CH01_7594083	SL2.50CH01	7594083	0.068	G	A	0.96474	0.03526	0	0	0	0
249	SSL2.50CH01_8145754	SL2.50CH01	8145754	0.131	T	C	0.92982	0.07018	0	0	0	0
250	SSL2.50CH01_8456200	SL2.50CH01	8456200	0.101	T	C	0.94656	0.05344	0	0	0	0
251	SSL2.50CH01_8456218	SL2.50CH01	8456218	0.04	C	T	0.97978	0.02022	0	0	0	0
252	SSL2.50CH01_8456231	SL2.50CH01	8456231	0.04	G	A	0.97978	0.02022	0	0	0	0
253	SSL2.50CH01_8456232	SL2.50CH01	8456232	0.01	C	T	0.99494	0.00506	0	0	0	0
254	SSL2.50CH01_8456236	SL2.50CH01	8456236	0.012	A	G	0.99377	0.00623	0	0	0	0
255	SSL2.50CH01_8456260	SL2.50CH01	8456260	0.059	G	T	0.96939	0.03061	0	0	0	0
256	SSL2.50CH01_9220353	SL2.50CH01	9220353	0.044	C	G	0.97733	0.02267	0	0	0	0
257	SSL2.50CH01_9220413	SL2.50CH01	9220413	0.013	A	G	0.9937	0.0063	0	0	0	0
258	SSL2.50CH01_9220420	SL2.50CH01	9220420	0.042	T	A	0.97859	0.02141	0	0	0	0
259	SSL2.50CH01_9579499	SL2.50CH01	9579499	0.047	C	T	0.97601	0.02399	0	0	0	0
260	SSL2.50CH01_9579567	SL2.50CH01	9579567	0.03	G	A	0.98485	0.01515	0	0	0	0
261	SSL2.50CH01_10418998	SL2.50CH01	10418998	0.103	C	A	0.94557	0.05443	0	0	0	0
262	SSL2.50CH01_10419028	SL2.50CH01	10419028	0.028	G	A	0.98563	0.01437	0	0	0	0
263	SSL2.50CH01_10419085	SL2.50CH01	10419085	0.015	A	C	0.99228	0.00772	0	0	0	0
264	SSL2.50CH01_11273187	SL2.50CH01	11273187	0.158	T	A	0.91353	0.08647	0	0	0	0
265	SSL2.50CH01_11273188	SL2.50CH01	11273188	0.109	T	C	0.94236	0.05764	0	0	0	0
266	SSL2.50CH01_11273200	SL2.50CH01	11273200	0.16	G	C	0.91228	0.08772	0	0	0	0
267	SSL2.50CH01_11273202	SL2.50CH01	11273202	0.044	C	G	0.97744	0.02256	0	0	0	0
268	SSL2.50CH01_11273237	SL2.50CH01	11273237	0.006	G	A	0.99692	0.00308	0	0	0	0
269	SSL2.50CH01_11273263	SL2.50CH01	11273263	0.124	A	T	0.93358	0.06642	0	0	0	0
270	SSL2.50CH01_11740854	SL2.50CH01	11740854	0.044	T	C	0.97733	0.02267	0	0	0	0
271	SSL2.50CH01_11740861	SL2.50CH01	11740861	0.155	C	T	0.91562	0.08438	0	0	0	0
272	SSL2.50CH01_11843460	SL2.50CH01	11843460	0.127	A	T	0.93165	0.06835	0	0	0	0
273	SSL2.50CH01_11927861	SL2.50CH01	11927861	0.122	A	C	0.93478	0.06522	0	0	0	0
274	SSL2.50CH01_11954038	SL2.50CH01	11954038	0.161	T	G	0.91332	0.06784	0.01884	0	0	0
275	SSL2.50CH01_11954064	SL2.50CH01	11954064	0.033	T	C	0.98333	0.01667	0	0	0	0
276	SSL2.50CH01_11954082	SL2.50CH01	11954082	0.113	C	T	0.9397	0.0603	0	0	0	0
277	SSL2.50CH01_11954097	SL2.50CH01	11954097	0.047	T	C	0.97613	0.02387	0	0	0	0
278	SSL2.50CH01_12010391	SL2.50CH01	12010391	0.149	G	C	0.91919	0.07828	0.00253	0	0	0
279	SSL2.50CH01_12010428	SL2.50CH01	12010428	0.08	A	G	0.9582	0.0418	0	0	0	0
280	SSL2.50CH01_12010432	SL2.50CH01	12010432	0.032	T	G	0.98387	0.01478	0.00134	0	0	0
281	SSL2.50CH01_14016256	SL2.50CH01	14016256	0.142	T	C	0.92337	0.07663	0	0	0	0
282	SSL2.50CH01_14016262	SL2.50CH01	14016262	0.037	C	T	0.98116	0.01884	0	0	0	0
283	SSL2.50CH01_14016314	SL2.50CH01	14016314	0.039	G	A	0.9799	0.0201	0	0	0	0
284	SSL2.50CH01_14523794	SL2.50CH01	14523794	0.039	C	G	0.9799	0.0201	0	0	0	0
285	SSL2.50CH01_14523798	SL2.50CH01	14523798	0.133	C	T	0.92839	0.07161	0	0	0	0
286	SSL2.50CH01_14523872	SL2.50CH01	14523872	0.102	T	C	0.94588	0.05412	0	0	0	0
287	SSL2.50CH01_15579075	SL2.50CH01	15579075	0.146	C	G	0.92045	0.07955	0	0	0	0
288	SSL2.50CH01_15579102	SL2.50CH01	15579102	0.061	T	C	0.96843	0.03157	0	0	0	0
289	SSL2.50CH01_15579123	SL2.50CH01	15579123	0.061	A	T	0.96843	0.03157	0	0	0	0
290	SSL2.50CH01_15579137	SL2.50CH01	15579137	0.042	C	T	0.97859	0.02141	0	0	0	0
291	SSL2.50CH01_16025197	SL2.50CH01	16025197	0.108	T	G	0.94275	0.05725	0	0	0	0
292	SSL2.50CH01_18225087	SL2.50CH01	18225087	0.126	T	C	0.93308	0.05808	0.00884	0	0	0
293	SSL2.50CH01_18225097	SL2.50CH01	18225097	0.037	G	A	0.98123	0.01877	0	0	0	0
294	SSL2.50CH01_18225099	SL2.50CH01	18225099	0.037	C	T	0.98123	0.01877	0	0	0	0
295	SSL2.50CH01_18225109	SL2.50CH01	18225109	0.042	C	G	0.97854	0.02146	0	0	0	0
296	SSL2.50CH01_18225127	SL2.50CH01	18225127	0.008	C	A	0.99622	0.00252	0.00126	0	0	0
297	SSL2.50CH01_18225133	SL2.50CH01	18225133	0.005	T	C	0.99748	0.00252	0	0	0	0
298	SSL2.50CH01_18225135	SL2.50CH01	18225135	0.005	C	G	0.99748	0.00252	0	0	0	0
299	SSL2.50CH01_18225151	SL2.50CH01	18225151	0.005	T	G	0.99748	0.00252	0	0	0	0
300	SSL2.50CH01_18411092	SL2.50CH01	18411092	0.027	A	T	0.98611	0.01389	0	0	0	0
301	SSL2.50CH01_18411106	SL2.50CH01	18411106	0.118	A	G	0.93687	0.06313	0	0	0	0
302	SSL2.50CH01_18411139	SL2.50CH01	18411139	0.068	T	C	0.96477	0.03523	0	0	0	0
303	SSL2.50CH01_18411149	SL2.50CH01	18411149	0.018	G	A	0.99114	0.00886	0	0	0	0
304	SSL2.50CH01_18411157	SL2.50CH01	18411157	0.012	G	C	0.99381	0.00464	0.00155	0	0	0
305	SSL2.50CH01_19041928	SL2.50CH01	19041928	0.064	G	A	0.96717	0.03283	0	0	0	0
306	SSL2.50CH01_19041940	SL2.50CH01	19041940	0.127	T	C	0.93182	0.06818	0	0	0	0
307	SSL2.50CH01_19041995	SL2.50CH01	19041995	0.087	A	G	0.95455	0.04167	0.00379	0	0	0
308	SSL2.50CH01_19041996	SL2.50CH01	19041996	0.042	A	G	0.97854	0.02146	0	0	0	0
309	SSL2.50CH01_19476373	SL2.50CH01	19476373	0.116	C	T	0.93813	0.06187	0	0	0	0
310	SSL2.50CH01_20001265	SL2.50CH01	20001265	0.049	A	C	0.97494	0.02506	0	0	0	0
311	SSL2.50CH01_20001266	SL2.50CH01	20001266	0.042	T	A	0.9787	0.0188	0.00251	0	0	0
312	SSL2.50CH01_20001318	SL2.50CH01	20001318	0.049	T	C	0.975	0.025	0	0	0	0
313	SSL2.50CH01_20932341	SL2.50CH01	20932341	0.071	T	C	0.96292	0.03708	0	0	0	0
314	SSL2.50CH01_20932358	SL2.50CH01	20932358	0.04	A	G	0.97962	0.02038	0	0	0	0
315	SSL2.50CH01_20932383	SL2.50CH01	20932383	0.023	T	C	0.98846	0.01154	0	0	0	0
316	SSL2.50CH01_20932387	SL2.50CH01	20932387	0.045	A	G	0.9769	0.02174	0.00136	0	0	0
317	SSL2.50CH01_22321985	SL2.50CH01	22321985	0.008	C	T	0.99622	0.00378	0	0	0	0
318	SSL2.50CH01_22564095	SL2.50CH01	22564095	0.307	T	C	0.81057	0.18943	0	0	0	0
319	SSL2.50CH01_22564106	SL2.50CH01	22564106	0.05	T	C	0.97416	0.02326	0.00258	0	0	0
320	SSL2.50CH01_22564140	SL2.50CH01	22564140	0.038	C	T	0.98066	0.01934	0	0	0	0
321	SSL2.50CH01_23177944	SL2.50CH01	23177944	0.171	T	A	0.90578	0.09422	0	0	0	0
322	SSL2.50CH01_23177962	SL2.50CH01	23177962	0.047	C	A	0.97613	0.02261	0.00126	0	0	0
323	SSL2.50CH01_23177994	SL2.50CH01	23177994	0.051	C	A	0.97362	0.02638	0	0	0	0
324	SSL2.50CH01_23211981	SL2.50CH01	23211981	0.008	T	A	0.99615	0.00385	0	0	0	0
325	SSL2.50CH01_23934659	SL2.50CH01	23934659	0.084	G	A	0.95592	0.04408	0	0	0	0
326	SSL2.50CH01_23934737	SL2.50CH01	23934737	0.089	T	G	0.95328	0.04672	0	0	0	0
327	SSL2.50CH01_24107776	SL2.50CH01	24107776	0.098	C	A	0.9481	0.0519	0	0	0	0
328	SSL2.50CH01_24107800	SL2.50CH01	24107800	0.008	C	T	0.9962	0.0038	0	0	0	0
329	SSL2.50CH01_24107806	SL2.50CH01	24107806	0.008	G	A	0.9962	0.0038	0	0	0	0
330	SSL2.50CH01_24107842	SL2.50CH01	24107842	0.008	C	G	0.9962	0.0038	0	0	0	0
331	SSL2.50CH01_24183773	SL2.50CH01	24183773	0.082	G	A	0.95739	0.04261	0	0	0	0
332	SSL2.50CH01_24183801	SL2.50CH01	24183801	0.061	C	A	0.96867	0.0188	0.01253	0	0	0
333	SSL2.50CH01_24183814	SL2.50CH01	24183814	0.017	T	C	0.99123	0.00877	0	0	0	0
334	SSL2.50CH01_24183824	SL2.50CH01	24183824	0.002	G	T	0.99875	0.00125	0	0	0	0
335	SSL2.50CH01_24866174	SL2.50CH01	24866174	0.118	T	C	0.93681	0.06319	0	0	0	0
336	SSL2.50CH01_25350896	SL2.50CH01	25350896	0.092	A	T	0.95165	0.04835	0	0	0	0
337	SSL2.50CH01_25366130	SL2.50CH01	25366130	0.003	C	A	0.99844	0.00156	0	0	0	0
338	SSL2.50CH01_25366131	SL2.50CH01	25366131	0.119	T	C	0.93655	0.06345	0	0	0	0
339	SSL2.50CH01_25366150	SL2.50CH01	25366150	0.029	T	A	0.98514	0.01486	0	0	0	0
340	SSL2.50CH01_25366154	SL2.50CH01	25366154	0.045	T	C	0.97709	0.02291	0	0	0	0
341	SSL2.50CH01_25366210	SL2.50CH01	25366210	0.02	T	A	0.98982	0.01018	0	0	0	0
342	SSL2.50CH01_25381307	SL2.50CH01	25381307	0.087	T	C	0.95443	0.04557	0	0	0	0
343	SSL2.50CH01_25381355	SL2.50CH01	25381355	0.04	G	A	0.9797	0.0203	0	0	0	0
344	SSL2.50CH01_26443977	SL2.50CH01	26443977	0.079	C	T	0.95865	0.04135	0	0	0	0
345	SSL2.50CH01_26444024	SL2.50CH01	26444024	0.015	A	C	0.99235	0.00459	0.00306	0	0	0
346	SSL2.50CH01_26444063	SL2.50CH01	26444063	0.042	G	T	0.97845	0.02155	0	0	0	0
347	SSL2.50CH01_27395501	SL2.50CH01	27395501	0.148	T	C	0.9198	0.0802	0	0	0	0
348	SSL2.50CH01_27395504	SL2.50CH01	27395504	0.051	G	C	0.97368	0.02632	0	0	0	0
349	SSL2.50CH01_27395511	SL2.50CH01	27395511	0.016	T	G	0.992	0.008	0	0	0	0
350	SSL2.50CH01_27395530	SL2.50CH01	27395530	0.042	A	C	0.97859	0.02141	0	0	0	0
351	SSL2.50CH01_27395537	SL2.50CH01	27395537	0.061	T	C	0.96851	0.02645	0.00504	0	0	0
352	SSL2.50CH01_27395544	SL2.50CH01	27395544	0.047	A	T	0.97607	0.02393	0	0	0	0
353	SSL2.50CH01_27395553	SL2.50CH01	27395553	0.144	T	C	0.92191	0.07809	0	0	0	0
354	SSL2.50CH01_27395556	SL2.50CH01	27395556	0.022	A	G	0.98872	0.01128	0	0	0	0
355	SSL2.50CH01_27395558	SL2.50CH01	27395558	0.066	T	C	0.96599	0.03149	0.00252	0	0	0
356	SSL2.50CH01_27395585	SL2.50CH01	27395585	0.052	C	T	0.97328	0.02672	0	0	0	0
357	SSL2.50CH01_27746744	SL2.50CH01	27746744	0.089	A	G	0.95328	0.04672	0	0	0	0
358	SSL2.50CH01_27746768	SL2.50CH01	27746768	0.01	C	T	0.99496	0.00504	0	0	0	0
359	SSL2.50CH01_27816931	SL2.50CH01	27816931	0.085	A	G	0.9557	0.0443	0	0	0	0
360	SSL2.50CH01_29352603	SL2.50CH01	29352603	0.08	G	A	0.95844	0.04156	0	0	0	0
361	SSL2.50CH01_29352611	SL2.50CH01	29352611	0.027	T	A	0.98618	0.01382	0	0	0	0
362	SSL2.50CH01_29352619	SL2.50CH01	29352619	0.075	G	A	0.96106	0.03894	0	0	0	0
363	SSL2.50CH01_30938195	SL2.50CH01	30938195	0.084	T	C	0.95581	0.04419	0	0	0	0
364	SSL2.50CH01_32101143	SL2.50CH01	32101143	0.043	A	T	0.97821	0.02179	0	0	0	0
365	SSL2.50CH01_32489254	SL2.50CH01	32489254	0.121	C	A	0.93528	0.06472	0	0	0	0
366	SSL2.50CH01_32489286	SL2.50CH01	32489286	0.019	G	A	0.99057	0.00943	0	0	0	0
367	SSL2.50CH01_32489299	SL2.50CH01	32489299	0.019	C	T	0.99057	0.00943	0	0	0	0
368	SSL2.50CH01_32489305	SL2.50CH01	32489305	0.047	G	T	0.97574	0.02426	0	0	0	0
369	SSL2.50CH01_32938327	SL2.50CH01	32938327	0.169	A	T	0.90704	0.09296	0	0	0	0
370	SSL2.50CH01_32938390	SL2.50CH01	32938390	0.059	A	T	0.96977	0.03023	0	0	0	0
371	SSL2.50CH01_35295306	SL2.50CH01	35295306	0.118	T	C	0.93703	0.06297	0	0	0	0
372	SSL2.50CH01_35295335	SL2.50CH01	35295335	0.125	A	G	0.93308	0.06692	0	0	0	0
373	SSL2.50CH01_35295356	SL2.50CH01	35295356	0.028	T	C	0.98563	0.01437	0	0	0	0
374	SSL2.50CH01_35295377	SL2.50CH01	35295377	0.028	G	A	0.98563	0.01437	0	0	0	0
375	SSL2.50CH01_35345492	SL2.50CH01	35345492	0.159	A	G	0.9131	0.0869	0	0	0	0
376	SSL2.50CH01_36266136	SL2.50CH01	36266136	0.15	C	T	0.91834	0.0804	0.00126	0	0	0
377	SSL2.50CH01_36266178	SL2.50CH01	36266178	0.039	T	G	0.97985	0.02015	0	0	0	0
378	SSL2.50CH01_39925266	SL2.50CH01	39925266	0.367	T	C	0.75754	0.24246	0	0	0	0
379	SSL2.50CH01_39925358	SL2.50CH01	39925358	0.055	T	C	0.97194	0.02806	0	0	0	0
380	SSL2.50CH01_40835534	SL2.50CH01	40835534	0.082	G	T	0.95729	0.04271	0	0	0	0
381	SSL2.50CH01_41235319	SL2.50CH01	41235319	0.162	A	G	0.9108	0.0892	0	0	0	0
382	SSL2.50CH01_41235347	SL2.50CH01	41235347	0.058	A	G	0.96985	0.03015	0	0	0	0
383	SSL2.50CH01_41235350	SL2.50CH01	41235350	0.079	G	A	0.95854	0.04146	0	0	0	0
384	SSL2.50CH01_41235380	SL2.50CH01	41235380	0.082	T	G	0.95729	0.04271	0	0	0	0
385	SSL2.50CH01_41513237	SL2.50CH01	41513237	0.082	G	C	0.95729	0.04271	0	0	0	0
386	SSL2.50CH01_42525846	SL2.50CH01	42525846	0.09	T	C	0.95293	0.04707	0	0	0	0
387	SSL2.50CH01_42525916	SL2.50CH01	42525916	0.119	A	G	0.93622	0.06378	0	0	0	0
388	SSL2.50CH01_43096841	SL2.50CH01	43096841	0.156	G	C	0.91479	0.08521	0	0	0	0
389	SSL2.50CH01_43096845	SL2.50CH01	43096845	0.039	A	C	0.98	0.02	0	0	0	0
390	SSL2.50CH01_43254406	SL2.50CH01	43254406	0.34	G	A	0.78299	0.21701	0	0	0	0
391	SSL2.50CH01_43254428	SL2.50CH01	43254428	0.034	A	G	0.98253	0.01747	0	0	0	0
392	SSL2.50CH01_43295663	SL2.50CH01	43295663	0.165	T	A	0.90955	0.09045	0	0	0	0
393	SSL2.50CH01_43334925	SL2.50CH01	43334925	0.366	A	T	0.75879	0.24121	0	0	0	0
394	SSL2.50CH01_43334965	SL2.50CH01	43334965	0.165	C	T	0.90955	0.09045	0	0	0	0
395	SSL2.50CH01_43353056	SL2.50CH01	43353056	0.01	G	A	0.99496	0.00504	0	0	0	0
396	SSL2.50CH01_43848457	SL2.50CH01	43848457	0.115	T	A	0.93893	0.06107	0	0	0	0
397	SSL2.50CH01_43848490	SL2.50CH01	43848490	0.015	G	A	0.99221	0.00779	0	0	0	0
398	SSL2.50CH01_44121502	SL2.50CH01	44121502	0.161	C	T	0.91184	0.08816	0	0	0	0
399	SSL2.50CH01_44173107	SL2.50CH01	44173107	0.033	A	G	0.98316	0.01684	0	0	0	0
400	SSL2.50CH01_44328284	SL2.50CH01	44328284	0.07	A	C	0.96366	0.03634	0	0	0	0
401	SSL2.50CH01_44328288	SL2.50CH01	44328288	0.077	A	G	0.9599	0.0401	0	0	0	0
402	SSL2.50CH01_44328292	SL2.50CH01	44328292	0.051	T	C	0.97368	0.02632	0	0	0	0
403	SSL2.50CH01_44328345	SL2.50CH01	44328345	0.021	T	G	0.98925	0.01075	0	0	0	0
404	SSL2.50CH01_46847997	SL2.50CH01	46847997	0.156	A	C	0.91457	0.08543	0	0	0	0
405	SSL2.50CH01_48053224	SL2.50CH01	48053224	0.091	A	T	0.95202	0.04798	0	0	0	0
406	SSL2.50CH01_48160356	SL2.50CH01	48160356	0.078	G	A	0.95929	0.04071	0	0	0	0
407	SSL2.50CH01_48160385	SL2.50CH01	48160385	0.052	T	G	0.97328	0.02672	0	0	0	0
408	SSL2.50CH01_48378742	SL2.50CH01	48378742	0.154	A	T	0.91583	0.08417	0	0	0	0
409	SSL2.50CH01_48425590	SL2.50CH01	48425590	0.084	C	G	0.95614	0.04386	0	0	0	0
410	SSL2.50CH01_48425640	SL2.50CH01	48425640	0.108	T	C	0.94275	0.05725	0	0	0	0
411	SSL2.50CH01_48425654	SL2.50CH01	48425654	0.083	G	A	0.95685	0.04315	0	0	0	0
412	SSL2.50CH01_53294729	SL2.50CH01	53294729	0.167	A	C	0.90806	0.09194	0	0	0	0
413	SSL2.50CH01_53595340	SL2.50CH01	53595340	0.149	T	C	0.91875	0.08125	0	0	0	0
414	SSL2.50CH01_53595372	SL2.50CH01	53595372	0.084	C	T	0.95625	0.04375	0	0	0	0
415	SSL2.50CH01_53737451	SL2.50CH01	53737451	0.129	A	G	0.93059	0.06941	0	0	0	0
416	SSL2.50CH01_55022293	SL2.50CH01	55022293	0.084	C	A	0.95614	0.04386	0	0	0	0
417	SSL2.50CH01_55022310	SL2.50CH01	55022310	0.003	T	C	0.99846	0.00154	0	0	0	0
418	SSL2.50CH01_55528816	SL2.50CH01	55528816	0.164	T	A	0.90977	0.09023	0	0	0	0
419	SSL2.50CH01_55528843	SL2.50CH01	55528843	0.042	A	G	0.9787	0.0213	0	0	0	0
420	SSL2.50CH01_56251481	SL2.50CH01	56251481	0.039	A	G	0.9799	0.0201	0	0	0	0
421	SSL2.50CH01_56251511	SL2.50CH01	56251511	0.03	C	A	0.98492	0.01508	0	0	0	0
422	SSL2.50CH01_56251548	SL2.50CH01	56251548	0.037	T	C	0.98125	0.01875	0	0	0	0
423	SSL2.50CH01_56251563	SL2.50CH01	56251563	0.003	T	G	0.99845	0.00155	0	0	0	0
424	SSL2.50CH01_56465941	SL2.50CH01	56465941	0.136	T	C	0.9264	0.0736	0	0	0	0
425	SSL2.50CH01_56465943	SL2.50CH01	56465943	0.081	G	T	0.95812	0.03299	0.00888	0	0	0
426	SSL2.50CH01_56745853	SL2.50CH01	56745853	0.161	T	C	0.91228	0.08396	0.00376	0	0	0
427	SSL2.50CH01_56745931	SL2.50CH01	56745931	0.079	G	A	0.95865	0.04135	0	0	0	0
428	SSL2.50CH01_56767903	SL2.50CH01	56767903	0.15	G	A	0.91814	0.08186	0	0	0	0
429	SSL2.50CH01_56767913	SL2.50CH01	56767913	0.005	A	T	0.99748	0.00252	0	0	0	0
430	SSL2.50CH01_56767930	SL2.50CH01	56767930	0.146	C	A	0.92065	0.07935	0	0	0	0
431	SSL2.50CH01_56988104	SL2.50CH01	56988104	0.003	T	C	0.99874	0.00126	0	0	0	0
432	SSL2.50CH01_56988109	SL2.50CH01	56988109	0.084	C	G	0.95603	0.04397	0	0	0	0
433	SSL2.50CH01_57380023	SL2.50CH01	57380023	0.076	T	C	0.96066	0.03934	0	0	0	0
434	SSL2.50CH01_57380083	SL2.50CH01	57380083	0.112	T	C	0.9402	0.0598	0	0	0	0
435	SSL2.50CH01_58365158	SL2.50CH01	58365158	0.081	C	T	0.95791	0.04209	0	0	0	0
436	SSL2.50CH01_58365161	SL2.50CH01	58365161	0.015	A	T	0.99235	0.00765	0	0	0	0
437	SSL2.50CH01_58365173	SL2.50CH01	58365173	0.025	C	G	0.98724	0.01276	0	0	0	0
438	SSL2.50CH01_58365175	SL2.50CH01	58365175	0.081	G	A	0.95791	0.04209	0	0	0	0
439	SSL2.50CH01_58365180	SL2.50CH01	58365180	0.023	T	C	0.98852	0.0102	0.00128	0	0	0
440	SSL2.50CH01_59845614	SL2.50CH01	59845614	0.075	C	G	0.96106	0.03894	0	0	0	0
441	SSL2.50CH01_59845623	SL2.50CH01	59845623	0.003	A	G	0.99846	0.00154	0	0	0	0
442	SSL2.50CH01_59845697	SL2.50CH01	59845697	0.017	C	T	0.99121	0.00879	0	0	0	0
443	SSL2.50CH01_60446523	SL2.50CH01	60446523	0.094	C	T	0.95038	0.04962	0	0	0	0
444	SSL2.50CH01_60446538	SL2.50CH01	60446538	0.071	C	A	0.9631	0.0369	0	0	0	0
445	SSL2.50CH01_60446593	SL2.50CH01	60446593	0.103	A	T	0.94529	0.05471	0	0	0	0
446	SSL2.50CH01_60774591	SL2.50CH01	60774591	0.151	T	G	0.9175	0.0825	0	0	0	0
447	SSL2.50CH01_60815312	SL2.50CH01	60815312	0.044	C	T	0.97744	0.02256	0	0	0	0
448	SSL2.50CH01_60815336	SL2.50CH01	60815336	0.039	T	A	0.97995	0.02005	0	0	0	0
449	SSL2.50CH01_60815346	SL2.50CH01	60815346	0.07	G	C	0.96366	0.03634	0	0	0	0
450	SSL2.50CH01_60815357	SL2.50CH01	60815357	0.07	T	A	0.96366	0.03634	0	0	0	0
451	SSL2.50CH01_60815395	SL2.50CH01	60815395	0.045	A	G	0.97704	0.02296	0	0	0	0
452	SSL2.50CH01_60885494	SL2.50CH01	60885494	0.152	C	G	0.91729	0.08271	0	0	0	0
453	SSL2.50CH01_60901135	SL2.50CH01	60901135	0.021	A	G	0.9892	0.0108	0	0	0	0
454	SSL2.50CH01_60901149	SL2.50CH01	60901149	0.162	T	A	0.9108	0.0892	0	0	0	0
455	SSL2.50CH01_60901152	SL2.50CH01	60901152	0.01	G	A	0.99497	0.00503	0	0	0	0
456	SSL2.50CH01_60901159	SL2.50CH01	60901159	0.006	G	T	0.99691	0.00309	0	0	0	0
457	SSL2.50CH01_60901164	SL2.50CH01	60901164	0.061	G	A	0.96859	0.03141	0	0	0	0
458	SSL2.50CH01_60901187	SL2.50CH01	60901187	0.017	G	T	0.99121	0.00879	0	0	0	0
459	SSL2.50CH01_60901194	SL2.50CH01	60901194	0.08	A	G	0.95833	0.04167	0	0	0	0
460	SSL2.50CH01_60901205	SL2.50CH01	60901205	0.006	C	T	0.99691	0.00309	0	0	0	0
461	SSL2.50CH01_60901212	SL2.50CH01	60901212	0.006	G	A	0.99691	0.00309	0	0	0	0
462	SSL2.50CH01_60901216	SL2.50CH01	60901216	0.006	A	G	0.99691	0.00309	0	0	0	0
463	SSL2.50CH01_60983700	SL2.50CH01	60983700	0.025	G	T	0.98731	0.01269	0	0	0	0
464	SSL2.50CH01_60983712	SL2.50CH01	60983712	0.105	A	G	0.94416	0.05584	0	0	0	0
465	SSL2.50CH01_60983742	SL2.50CH01	60983742	0.103	A	G	0.94543	0.05457	0	0	0	0
466	SSL2.50CH01_61033091	SL2.50CH01	61033091	0.114	A	G	0.93943	0.06057	0	0	0	0
467	SSL2.50CH01_61242367	SL2.50CH01	61242367	0.02	T	C	0.98995	0.01005	0	0	0	0
468	SSL2.50CH01_61544570	SL2.50CH01	61544570	0.042	T	A	0.97864	0.02136	0	0	0	0
469	SSL2.50CH01_61544582	SL2.50CH01	61544582	0.063	G	T	0.96734	0.03266	0	0	0	0
470	SSL2.50CH01_61544591	SL2.50CH01	61544591	0.142	C	T	0.92337	0.07663	0	0	0	0
471	SSL2.50CH01_61544604	SL2.50CH01	61544604	0.02	C	A	0.98995	0.01005	0	0	0	0
472	SSL2.50CH01_61544663	SL2.50CH01	61544663	0.066	A	G	0.96608	0.03392	0	0	0	0
473	SSL2.50CH01_61880986	SL2.50CH01	61880986	0.146	A	T	0.92085	0.07915	0	0	0	0
474	SSL2.50CH01_61880993	SL2.50CH01	61880993	0.075	A	G	0.96106	0.03894	0	0	0	0
475	SSL2.50CH01_61880997	SL2.50CH01	61880997	0.051	A	G	0.97362	0.02638	0	0	0	0
476	SSL2.50CH01_61880998	SL2.50CH01	61880998	0.051	A	T	0.97362	0.02638	0	0	0	0
477	SSL2.50CH01_62808259	SL2.50CH01	62808259	0.135	A	T	0.92695	0.07305	0	0	0	0
478	SSL2.50CH01_62808290	SL2.50CH01	62808290	0.005	A	T	0.99748	0.00252	0	0	0	0
479	SSL2.50CH01_62846362	SL2.50CH01	62846362	0.16	C	T	0.91228	0.08772	0	0	0	0
480	SSL2.50CH01_62846367	SL2.50CH01	62846367	0.054	T	C	0.97243	0.02757	0	0	0	0
481	SSL2.50CH01_62846392	SL2.50CH01	62846392	0.046	G	A	0.97619	0.02381	0	0	0	0
482	SSL2.50CH01_62846395	SL2.50CH01	62846395	0.044	A	G	0.97733	0.02267	0	0	0	0
483	SSL2.50CH01_62846397	SL2.50CH01	62846397	0.051	A	G	0.97368	0.02632	0	0	0	0
484	SSL2.50CH01_62846411	SL2.50CH01	62846411	0.046	G	T	0.97619	0.02381	0	0	0	0
485	SSL2.50CH01_63481986	SL2.50CH01	63481986	0.129	A	T	0.93056	0.06944	0	0	0	0
486	SSL2.50CH01_63481992	SL2.50CH01	63481992	0.046	A	G	0.97619	0.02381	0	0	0	0
487	SSL2.50CH01_63550400	SL2.50CH01	63550400	0.152	T	C	0.91688	0.08312	0	0	0	0
488	SSL2.50CH01_63550458	SL2.50CH01	63550458	0.045	T	C	0.97692	0.02308	0	0	0	0
489	SSL2.50CH01_63864873	SL2.50CH01	63864873	0.157	A	G	0.91436	0.08564	0	0	0	0
490	SSL2.50CH01_63864880	SL2.50CH01	63864880	0.125	C	T	0.93325	0.06675	0	0	0	0
491	SSL2.50CH01_63864890	SL2.50CH01	63864890	0.082	A	G	0.95718	0.04156	0.00126	0	0	0
492	SSL2.50CH01_63864928	SL2.50CH01	63864928	0.084	A	C	0.95592	0.04408	0	0	0	0
493	SSL2.50CH01_64054845	SL2.50CH01	64054845	0.157	T	C	0.91436	0.08564	0	0	0	0
494	SSL2.50CH01_64054888	SL2.50CH01	64054888	0.082	A	G	0.95718	0.04282	0	0	0	0
495	SSL2.50CH01_64054935	SL2.50CH01	64054935	0.003	T	C	0.99874	0.00126	0	0	0	0
496	SSL2.50CH01_64149202	SL2.50CH01	64149202	0.01	C	T	0.99494	0.00506	0	0	0	0
497	SSL2.50CH01_64149219	SL2.50CH01	64149219	0.353	T	C	0.77146	0.22854	0	0	0	0
498	SSL2.50CH01_64149255	SL2.50CH01	64149255	0.061	T	A	0.96843	0.03157	0	0	0	0
499	SSL2.50CH01_64149270	SL2.50CH01	64149270	0.01	C	T	0.99495	0.00505	0	0	0	0
500	SSL2.50CH01_64165763	SL2.50CH01	64165763	0.158	A	G	0.91332	0.08668	0	0	0	0
501	SSL2.50CH01_64165836	SL2.50CH01	64165836	0.012	A	G	0.99372	0.00628	0	0	0	0
502	SSL2.50CH01_64322514	SL2.50CH01	64322514	0.037	T	C	0.98101	0.01899	0	0	0	0
503	SSL2.50CH01_64322523	SL2.50CH01	64322523	0.127	A	G	0.93165	0.06835	0	0	0	0
504	SSL2.50CH01_64954125	SL2.50CH01	64954125	0.157	A	G	0.91414	0.08586	0	0	0	0
505	SSL2.50CH01_64954133	SL2.50CH01	64954133	0.005	G	A	0.99747	0.00253	0	0	0	0
506	SSL2.50CH01_64954172	SL2.50CH01	64954172	0.116	G	T	0.93813	0.05934	0.00253	0	0	0
507	SSL2.50CH01_65869729	SL2.50CH01	65869729	0.052	T	C	0.97319	0.02681	0	0	0	0
508	SSL2.50CH01_65869731	SL2.50CH01	65869731	0.089	G	A	0.9534	0.0466	0	0	0	0
509	SSL2.50CH01_65869742	SL2.50CH01	65869742	0.163	G	A	0.91058	0.08942	0	0	0	0
510	SSL2.50CH01_65885155	SL2.50CH01	65885155	0.146	A	T	0.92085	0.07915	0	0	0	0
511	SSL2.50CH01_65885176	SL2.50CH01	65885176	0.003	C	G	0.99846	0.00154	0	0	0	0
512	SSL2.50CH01_65885191	SL2.50CH01	65885191	0.005	C	G	0.99749	0.00251	0	0	0	0
513	SSL2.50CH01_66483776	SL2.50CH01	66483776	0.155	G	T	0.91562	0.08438	0	0	0	0
514	SSL2.50CH01_66483825	SL2.50CH01	66483825	0.078	T	C	0.95949	0.04051	0	0	0	0
515	SSL2.50CH01_67338865	SL2.50CH01	67338865	0.047	A	T	0.97581	0.02285	0.00134	0	0	0
516	SSL2.50CH01_67338880	SL2.50CH01	67338880	0.11	T	A	0.94162	0.05838	0	0	0	0
517	SSL2.50CH01_67338933	SL2.50CH01	67338933	0.11	C	G	0.94162	0.05838	0	0	0	0
518	SSL2.50CH01_67338943	SL2.50CH01	67338943	0.03	T	C	0.98477	0.01523	0	0	0	0
519	SSL2.50CH01_69261627	SL2.50CH01	69261627	0.121	G	T	0.93544	0.06329	0.00127	0	0	0
520	SSL2.50CH01_69261637	SL2.50CH01	69261637	0.047	G	A	0.97595	0.02405	0	0	0	0
521	SSL2.50CH01_69280600	SL2.50CH01	69280600	0.374	A	G	0.76692	0.18922	0.04386	0	0	0
522	SSL2.50CH01_69280685	SL2.50CH01	69280685	0.079	T	C	0.95865	0.04135	0	0	0	0
523	SSL2.50CH01_69458322	SL2.50CH01	69458322	0.161	A	T	0.91184	0.08816	0	0	0	0
524	SSL2.50CH01_69458354	SL2.50CH01	69458354	0.086	T	C	0.95477	0.04523	0	0	0	0
525	SSL2.50CH01_69502383	SL2.50CH01	69502383	0.063	T	G	0.96734	0.03266	0	0	0	0
526	SSL2.50CH01_69502385	SL2.50CH01	69502385	0.061	A	G	0.96859	0.03141	0	0	0	0
527	SSL2.50CH01_69502394	SL2.50CH01	69502394	0.022	C	T	0.98869	0.01131	0	0	0	0
528	SSL2.50CH01_69502411	SL2.50CH01	69502411	0.027	G	T	0.98618	0.01382	0	0	0	0
529	SSL2.50CH01_69502426	SL2.50CH01	69502426	0.042	T	C	0.97839	0.02161	0	0	0	0
530	SSL2.50CH01_71739470	SL2.50CH01	71739470	0.112	G	A	0.9402	0.0598	0	0	0	0
531	SSL2.50CH01_71739508	SL2.50CH01	71739508	0.028	C	T	0.98604	0.01396	0	0	0	0
532	SSL2.50CH01_71739523	SL2.50CH01	71739523	0.028	A	C	0.98601	0.01399	0	0	0	0
533	SSL2.50CH01_71739533	SL2.50CH01	71739533	0.013	G	T	0.99324	0.00676	0	0	0	0
534	SSL2.50CH01_71739538	SL2.50CH01	71739538	0.029	G	A	0.98514	0.01486	0	0	0	0
535	SSL2.50CH01_71739549	SL2.50CH01	71739549	0.015	G	C	0.99241	0.00759	0	0	0	0
536	SSL2.50CH01_71739554	SL2.50CH01	71739554	0.028	G	C	0.98601	0.01399	0	0	0	0
537	SSL2.50CH01_71739560	SL2.50CH01	71739560	0.015	G	A	0.99239	0.00761	0	0	0	0
538	SSL2.50CH01_71787796	SL2.50CH01	71787796	0.098	A	G	0.94823	0.05177	0	0	0	0
539	SSL2.50CH01_72315460	SL2.50CH01	72315460	0.191	G	A	0.89322	0.10678	0	0	0	0
540	SSL2.50CH01_72330907	SL2.50CH01	72330907	0.158	G	T	0.91353	0.08647	0	0	0	0
541	SSL2.50CH01_72330934	SL2.50CH01	72330934	0.079	T	C	0.95865	0.04135	0	0	0	0
542	SSL2.50CH01_72450989	SL2.50CH01	72450989	0.117	T	G	0.93766	0.06107	0.00127	0	0	0
543	SSL2.50CH01_72451057	SL2.50CH01	72451057	0.023	A	C	0.98834	0.01166	0	0	0	0
544	SSL2.50CH01_72715423	SL2.50CH01	72715423	0.09	G	A	0.95305	0.04569	0.00127	0	0	0
545	SSL2.50CH01_72715434	SL2.50CH01	72715434	0.003	G	T	0.99864	0.00136	0	0	0	0
546	SSL2.50CH01_72715474	SL2.50CH01	72715474	0.032	C	G	0.9835	0.0165	0	0	0	0
547	SSL2.50CH01_73047151	SL2.50CH01	73047151	0.165	T	C	0.90932	0.09068	0	0	0	0
548	SSL2.50CH01_73100530	SL2.50CH01	73100530	0.063	T	C	0.96734	0.02889	0.00377	0	0	0
549	SSL2.50CH01_73100542	SL2.50CH01	73100542	0.183	T	C	0.89824	0.10176	0	0	0	0
550	SSL2.50CH01_73100547	SL2.50CH01	73100547	0.063	T	G	0.96734	0.03266	0	0	0	0
551	SSL2.50CH01_73100569	SL2.50CH01	73100569	0.03	G	A	0.98496	0.01504	0	0	0	0
552	SSL2.50CH01_73714299	SL2.50CH01	73714299	0.12	C	T	0.93573	0.06427	0	0	0	0
553	SSL2.50CH01_74162755	SL2.50CH01	74162755	0.088	T	G	0.95396	0.04604	0	0	0	0
554	SSL2.50CH01_74238803	SL2.50CH01	74238803	0.044	G	C	0.97727	0.02273	0	0	0	0
555	SSL2.50CH01_74238804	SL2.50CH01	74238804	0.151	G	C	0.91793	0.08207	0	0	0	0
556	SSL2.50CH01_74238838	SL2.50CH01	74238838	0.091	G	A	0.95202	0.04798	0	0	0	0
557	SSL2.50CH01_74646467	SL2.50CH01	74646467	0.117	G	A	0.93782	0.06218	0	0	0	0
558	SSL2.50CH01_74696533	SL2.50CH01	74696533	0.005	T	C	0.99747	0.00253	0	0	0	0
559	SSL2.50CH01_74696537	SL2.50CH01	74696537	0.068	T	C	0.96474	0.03526	0	0	0	0
560	SSL2.50CH01_74696541	SL2.50CH01	74696541	0.047	G	A	0.97601	0.02399	0	0	0	0
561	SSL2.50CH01_74696544	SL2.50CH01	74696544	0.129	T	C	0.93073	0.06927	0	0	0	0
562	SSL2.50CH01_74696551	SL2.50CH01	74696551	0.047	C	T	0.97601	0.02399	0	0	0	0
563	SSL2.50CH01_74696552	SL2.50CH01	74696552	0.005	G	T	0.99747	0.00253	0	0	0	0
564	SSL2.50CH01_74696567	SL2.50CH01	74696567	0.052	A	G	0.97355	0.02267	0.00378	0	0	0
565	SSL2.50CH01_75013057	SL2.50CH01	75013057	0.077	T	A	0.9597	0.0403	0	0	0	0
566	SSL2.50CH01_75013059	SL2.50CH01	75013059	0.044	A	T	0.97733	0.02267	0	0	0	0
567	SSL2.50CH01_75093616	SL2.50CH01	75093616	0.15	A	G	0.91834	0.08166	0	0	0	0
568	SSL2.50CH01_75142303	SL2.50CH01	75142303	0.009	T	C	0.99537	0.00463	0	0	0	0
569	SSL2.50CH01_75142320	SL2.50CH01	75142320	0.113	A	G	0.9397	0.0603	0	0	0	0
570	SSL2.50CH01_75142339	SL2.50CH01	75142339	0.009	C	A	0.99537	0.00463	0	0	0	0
571	SSL2.50CH01_75142344	SL2.50CH01	75142344	0.027	G	A	0.98618	0.01382	0	0	0	0
572	SSL2.50CH01_75142348	SL2.50CH01	75142348	0.032	T	G	0.98367	0.01633	0	0	0	0
573	SSL2.50CH01_75142361	SL2.50CH01	75142361	0.009	C	T	0.99537	0.00463	0	0	0	0
574	SSL2.50CH01_75142375	SL2.50CH01	75142375	0.051	G	A	0.97362	0.02638	0	0	0	0
575	SSL2.50CH01_75142380	SL2.50CH01	75142380	0.009	T	C	0.99537	0.00463	0	0	0	0
576	SSL2.50CH01_75142386	SL2.50CH01	75142386	0.009	C	A	0.99537	0.00463	0	0	0	0
577	SSL2.50CH01_75142398	SL2.50CH01	75142398	0.012	C	T	0.99383	0.00617	0	0	0	0
578	SSL2.50CH01_75142399	SL2.50CH01	75142399	0.012	A	C	0.99383	0.00617	0	0	0	0
579	SSL2.50CH01_75179356	SL2.50CH01	75179356	0.07	C	G	0.96348	0.03652	0	0	0	0
580	SSL2.50CH01_75179401	SL2.50CH01	75179401	0.034	G	A	0.98266	0.01734	0	0	0	0
581	SSL2.50CH01_75211091	SL2.50CH01	75211091	0.152	G	T	0.91709	0.08291	0	0	0	0
582	SSL2.50CH01_75211129	SL2.50CH01	75211129	0.022	T	G	0.98869	0.01131	0	0	0	0
583	SSL2.50CH01_75367035	SL2.50CH01	75367035	0.162	G	A	0.91103	0.08897	0	0	0	0
584	SSL2.50CH01_75405193	SL2.50CH01	75405193	0.12	G	A	0.93561	0.06439	0	0	0	0
585	SSL2.50CH01_75405240	SL2.50CH01	75405240	0.125	C	T	0.93308	0.06692	0	0	0	0
586	SSL2.50CH01_75429204	SL2.50CH01	75429204	0.169	C	T	0.90704	0.09296	0	0	0	0
587	SSL2.50CH01_75509528	SL2.50CH01	75509528	0.072	G	T	0.96241	0.03759	0	0	0	0
588	SSL2.50CH01_75621442	SL2.50CH01	75621442	0.104	G	T	0.94472	0.05528	0	0	0	0
589	SSL2.50CH01_75714403	SL2.50CH01	75714403	0.281	C	T	0.83123	0.16877	0	0	0	0
590	SSL2.50CH01_75838476	SL2.50CH01	75838476	0.048	T	A	0.9755	0.0245	0	0	0	0
591	SSL2.50CH01_75868254	SL2.50CH01	75868254	0.159	G	A	0.91288	0.08712	0	0	0	0
592	SSL2.50CH01_75868257	SL2.50CH01	75868257	0.037	G	A	0.98101	0.01899	0	0	0	0
593	SSL2.50CH01_75868264	SL2.50CH01	75868264	0.078	C	A	0.95949	0.04051	0	0	0	0
594	SSL2.50CH01_75868272	SL2.50CH01	75868272	0.078	G	C	0.95939	0.04061	0	0	0	0
595	SSL2.50CH01_75868276	SL2.50CH01	75868276	0.037	A	T	0.98131	0.01869	0	0	0	0
596	SSL2.50CH01_75868315	SL2.50CH01	75868315	0.052	T	C	0.97342	0.02405	0.00253	0	0	0
597	SSL2.50CH01_76228657	SL2.50CH01	76228657	0.131	A	G	0.92929	0.07071	0	0	0	0
598	SSL2.50CH01_76228709	SL2.50CH01	76228709	0.025	A	G	0.98758	0.01242	0	0	0	0
599	SSL2.50CH01_76228715	SL2.50CH01	76228715	0.085	C	G	0.9557	0.0443	0	0	0	0
600	SSL2.50CH01_76228733	SL2.50CH01	76228733	0.101	C	T	0.94684	0.05316	0	0	0	0
601	SSL2.50CH01_76228747	SL2.50CH01	76228747	0.027	A	T	0.98611	0.01389	0	0	0	0
602	SSL2.50CH01_76264316	SL2.50CH01	76264316	0.165	C	G	0.90909	0.09091	0	0	0	0
603	SSL2.50CH01_76264322	SL2.50CH01	76264322	0.032	C	T	0.98371	0.01629	0	0	0	0
604	SSL2.50CH01_76264330	SL2.50CH01	76264330	0.137	C	T	0.92588	0.07412	0	0	0	0
605	SSL2.50CH01_76352503	SL2.50CH01	76352503	0.063	C	G	0.96734	0.03266	0	0	0	0
606	SSL2.50CH01_76352510	SL2.50CH01	76352510	0.084	G	A	0.95603	0.04397	0	0	0	0
607	SSL2.50CH01_76352581	SL2.50CH01	76352581	0.056	G	C	0.97111	0.02889	0	0	0	0
608	SSL2.50CH01_76368595	SL2.50CH01	76368595	0.051	C	T	0.97368	0.02632	0	0	0	0
609	SSL2.50CH01_76368606	SL2.50CH01	76368606	0.079	G	A	0.95865	0.04135	0	0	0	0
610	SSL2.50CH01_76368635	SL2.50CH01	76368635	0.082	G	A	0.95729	0.04271	0	0	0	0
611	SSL2.50CH01_76442563	SL2.50CH01	76442563	0.167	A	G	0.90829	0.09171	0	0	0	0
612	SSL2.50CH01_76474038	SL2.50CH01	76474038	0.069	C	T	0.96465	0.01641	0.01389	0.00505	0	0
613	SSL2.50CH01_76474040	SL2.50CH01	76474040	0.039	T	C	0.97994	0.02006	0	0	0	0
614	SSL2.50CH01_76474045	SL2.50CH01	76474045	0.144	G	T	0.92191	0.07809	0	0	0	0
615	SSL2.50CH01_76474063	SL2.50CH01	76474063	0.039	T	A	0.97985	0.02015	0	0	0	0
616	SSL2.50CH01_76652911	SL2.50CH01	76652911	0.16	A	C	0.91206	0.08794	0	0	0	0
617	SSL2.50CH01_76652986	SL2.50CH01	76652986	0.042	T	A	0.97859	0.02141	0	0	0	0
618	SSL2.50CH01_76923520	SL2.50CH01	76923520	0.063	G	A	0.96757	0.03243	0	0	0	0
619	SSL2.50CH01_76923526	SL2.50CH01	76923526	0.006	G	A	0.99689	0.00311	0	0	0	0
620	SSL2.50CH01_76923528	SL2.50CH01	76923528	0.049	G	A	0.975	0.025	0	0	0	0
621	SSL2.50CH01_76970122	SL2.50CH01	76970122	0.113	T	C	0.9397	0.0603	0	0	0	0
622	SSL2.50CH01_76970184	SL2.50CH01	76970184	0.032	T	C	0.98363	0.01637	0	0	0	0
623	SSL2.50CH01_76970194	SL2.50CH01	76970194	0.02	T	C	0.98995	0.01005	0	0	0	0
624	SSL2.50CH01_77031042	SL2.50CH01	77031042	0.101	C	T	0.9467	0.0533	0	0	0	0
625	SSL2.50CH01_77051925	SL2.50CH01	77051925	0.034	C	T	0.98246	0.01754	0	0	0	0
626	SSL2.50CH01_77051945	SL2.50CH01	77051945	0.124	G	T	0.93358	0.06516	0.00125	0	0	0
627	SSL2.50CH01_77051946	SL2.50CH01	77051946	0.008	A	T	0.99622	0.00378	0	0	0	0
628	SSL2.50CH01_77051961	SL2.50CH01	77051961	0.111	C	T	0.9411	0.0589	0	0	0	0
629	SSL2.50CH01_77051990	SL2.50CH01	77051990	0.056	A	T	0.97118	0.02882	0	0	0	0
630	SSL2.50CH01_77052012	SL2.50CH01	77052012	0.039	T	A	0.9799	0.0201	0	0	0	0
631	SSL2.50CH01_77067248	SL2.50CH01	77067248	0.083	A	C	0.95641	0.04359	0	0	0	0
632	SSL2.50CH01_77067312	SL2.50CH01	77067312	0.025	A	G	0.98718	0.01282	0	0	0	0
633	SSL2.50CH01_77083470	SL2.50CH01	77083470	0.166	G	A	0.90852	0.09148	0	0	0	0
634	SSL2.50CH01_77083520	SL2.50CH01	77083520	0.005	C	T	0.99749	0.00251	0	0	0	0
635	SSL2.50CH01_77083539	SL2.50CH01	77083539	0.005	G	A	0.99749	0.00251	0	0	0	0
636	SSL2.50CH01_77115304	SL2.50CH01	77115304	0.143	A	G	0.92231	0.07769	0	0	0	0
637	SSL2.50CH01_77115359	SL2.50CH01	77115359	0.084	T	A	0.95614	0.04386	0	0	0	0
638	SSL2.50CH01_77196243	SL2.50CH01	77196243	0.092	T	A	0.9519	0.0481	0	0	0	0
639	SSL2.50CH01_77235144	SL2.50CH01	77235144	0.03	T	C	0.98485	0.01515	0	0	0	0
640	SSL2.50CH01_77235205	SL2.50CH01	77235205	0.084	C	A	0.95592	0.04408	0	0	0	0
641	SSL2.50CH01_77265410	SL2.50CH01	77265410	0.085	C	T	0.9557	0.0443	0	0	0	0
642	SSL2.50CH01_77265464	SL2.50CH01	77265464	0.027	T	A	0.98608	0.01266	0.00127	0	0	0
643	SSL2.50CH01_77265489	SL2.50CH01	77265489	0.116	G	T	0.93797	0.06203	0	0	0	0
644	SSL2.50CH01_77315819	SL2.50CH01	77315819	0.133	T	C	0.92821	0.07179	0	0	0	0
645	SSL2.50CH01_77315842	SL2.50CH01	77315842	0.044	T	A	0.97733	0.02267	0	0	0	0
646	SSL2.50CH01_77425186	SL2.50CH01	77425186	0.198	T	C	0.88889	0.11111	0	0	0	0
647	SSL2.50CH01_77549840	SL2.50CH01	77549840	0.137	G	T	0.92602	0.07398	0	0	0	0
648	SSL2.50CH01_77580479	SL2.50CH01	77580479	0.047	T	A	0.97613	0.02387	0	0	0	0
649	SSL2.50CH01_77580484	SL2.50CH01	77580484	0.146	A	G	0.92085	0.07915	0	0	0	0
650	SSL2.50CH01_77580489	SL2.50CH01	77580489	0.047	T	C	0.97613	0.02387	0	0	0	0
651	SSL2.50CH01_77622540	SL2.50CH01	77622540	0.083	A	G	0.95641	0.04359	0	0	0	0
652	SSL2.50CH01_77668908	SL2.50CH01	77668908	0.173	C	A	0.90428	0.09572	0	0	0	0
653	SSL2.50CH01_77668922	SL2.50CH01	77668922	0.047	T	G	0.97595	0.02405	0	0	0	0
654	SSL2.50CH01_77668968	SL2.50CH01	77668968	0.062	G	A	0.96793	0.03207	0	0	0	0
655	SSL2.50CH01_77707542	SL2.50CH01	77707542	0.166	C	A	0.90852	0.09148	0	0	0	0
656	SSL2.50CH01_77707556	SL2.50CH01	77707556	0.049	A	T	0.97494	0.02506	0	0	0	0
657	SSL2.50CH01_77742507	SL2.50CH01	77742507	0.12	T	C	0.93593	0.06407	0	0	0	0
658	SSL2.50CH01_77742527	SL2.50CH01	77742527	0.061	G	A	0.96859	0.03141	0	0	0	0
659	SSL2.50CH01_77742541	SL2.50CH01	77742541	0.061	T	C	0.96859	0.03141	0	0	0	0
660	SSL2.50CH01_77742587	SL2.50CH01	77742587	0.056	C	T	0.97111	0.02889	0	0	0	0
661	SSL2.50CH01_77763583	SL2.50CH01	77763583	0.121	G	C	0.93544	0.06456	0	0	0	0
662	SSL2.50CH01_77763591	SL2.50CH01	77763591	0.03	A	G	0.98481	0.01519	0	0	0	0
663	SSL2.50CH01_78151973	SL2.50CH01	78151973	0.137	G	C	0.92588	0.07412	0	0	0	0
664	SSL2.50CH01_78151996	SL2.50CH01	78151996	0.012	G	A	0.99383	0.00617	0	0	0	0
665	SSL2.50CH01_78277286	SL2.50CH01	78277286	0.054	A	G	0.97236	0.02764	0	0	0	0
666	SSL2.50CH01_78277298	SL2.50CH01	78277298	0.225	A	G	0.8706	0.1294	0	0	0	0
667	SSL2.50CH01_78277350	SL2.50CH01	78277350	0.107	C	A	0.94347	0.05653	0	0	0	0
668	SSL2.50CH01_78297104	SL2.50CH01	78297104	0.044	T	G	0.97739	0.02261	0	0	0	0
669	SSL2.50CH01_78404011	SL2.50CH01	78404011	0.141	T	C	0.92356	0.07644	0	0	0	0
670	SSL2.50CH01_78404027	SL2.50CH01	78404027	0.046	A	C	0.97619	0.02381	0	0	0	0
671	SSL2.50CH01_78496814	SL2.50CH01	78496814	0.499	G	A	0.51637	0.48363	0	0	0	0
672	SSL2.50CH01_78511975	SL2.50CH01	78511975	0.135	C	T	0.92695	0.07305	0	0	0	0
673	SSL2.50CH01_78527982	SL2.50CH01	78527982	0.15	T	C	0.91855	0.08145	0	0	0	0
674	SSL2.50CH01_78527986	SL2.50CH01	78527986	0.056	G	A	0.97118	0.02882	0	0	0	0
675	SSL2.50CH01_78543719	SL2.50CH01	78543719	0.042	A	G	0.97854	0.02146	0	0	0	0
676	SSL2.50CH01_78543728	SL2.50CH01	78543728	0.112	G	T	0.94066	0.05934	0	0	0	0
677	SSL2.50CH01_78574296	SL2.50CH01	78574296	0.108	T	C	0.94275	0.05216	0.00509	0	0	0
678	SSL2.50CH01_78589312	SL2.50CH01	78589312	0.082	A	G	0.95729	0.04271	0	0	0	0
679	SSL2.50CH01_78589318	SL2.50CH01	78589318	0.124	T	A	0.93342	0.06658	0	0	0	0
680	SSL2.50CH01_78589370	SL2.50CH01	78589370	0.086	C	T	0.95477	0.04523	0	0	0	0
681	SSL2.50CH01_78675305	SL2.50CH01	78675305	0.079	T	C	0.95865	0.04135	0	0	0	0
682	SSL2.50CH01_78780594	SL2.50CH01	78780594	0.423	G	C	0.69571	0.30429	0	0	0	0
683	SSL2.50CH01_78780643	SL2.50CH01	78780643	0.059	A	C	0.9697	0.0303	0	0	0	0
684	SSL2.50CH01_78896497	SL2.50CH01	78896497	0.077	G	T	0.9599	0.0401	0	0	0	0
685	SSL2.50CH01_78912203	SL2.50CH01	78912203	0.082	C	T	0.95729	0.04271	0	0	0	0
686	SSL2.50CH01_78912223	SL2.50CH01	78912223	0.019	A	G	0.99064	0.00936	0	0	0	0
687	SSL2.50CH01_78928328	SL2.50CH01	78928328	0.044	T	C	0.97733	0.02267	0	0	0	0
688	SSL2.50CH01_78944108	SL2.50CH01	78944108	0.128	C	G	0.93108	0.06892	0	0	0	0
689	SSL2.50CH01_78944111	SL2.50CH01	78944111	0.07	C	G	0.96366	0.03634	0	0	0	0
690	SSL2.50CH01_78993605	SL2.50CH01	78993605	0.137	T	G	0.92607	0.07393	0	0	0	0
691	SSL2.50CH01_78993609	SL2.50CH01	78993609	0.044	G	C	0.97744	0.02256	0	0	0	0
692	SSL2.50CH01_78993628	SL2.50CH01	78993628	0.03	C	T	0.98496	0.01504	0	0	0	0
693	SSL2.50CH01_78993633	SL2.50CH01	78993633	0.075	A	G	0.96115	0.03885	0	0	0	0
694	SSL2.50CH01_78993657	SL2.50CH01	78993657	0.133	A	C	0.92857	0.07018	0.00125	0	0	0
695	SSL2.50CH01_78993667	SL2.50CH01	78993667	0.07	T	C	0.96366	0.03634	0	0	0	0
696	SSL2.50CH01_79130468	SL2.50CH01	79130468	0.058	T	A	0.96985	0.03015	0	0	0	0
697	SSL2.50CH01_79130486	SL2.50CH01	79130486	0.104	A	T	0.94472	0.05528	0	0	0	0
698	SSL2.50CH01_79130552	SL2.50CH01	79130552	0.051	T	A	0.97362	0.02638	0	0	0	0
699	SSL2.50CH01_79130567	SL2.50CH01	79130567	0.044	G	A	0.97727	0.02273	0	0	0	0
700	SSL2.50CH01_79162002	SL2.50CH01	79162002	0.284	A	T	0.82832	0.17168	0	0	0	0
701	SSL2.50CH01_79162043	SL2.50CH01	79162043	0.11	T	A	0.94154	0.05846	0	0	0	0
702	SSL2.50CH01_79162051	SL2.50CH01	79162051	0.027	G	A	0.98622	0.01378	0	0	0	0
703	SSL2.50CH01_79162084	SL2.50CH01	79162084	0.061	T	A	0.96867	0.01629	0.01504	0	0	0
704	SSL2.50CH01_79244754	SL2.50CH01	79244754	0.311	G	A	0.8073	0.1927	0	0	0	0
705	SSL2.50CH01_79295213	SL2.50CH01	79295213	0.136	T	C	0.92658	0.07342	0	0	0	0
706	SSL2.50CH01_79423022	SL2.50CH01	79423022	0.158	C	T	0.91332	0.08668	0	0	0	0
707	SSL2.50CH01_79423075	SL2.50CH01	79423075	0.056	C	T	0.97103	0.02897	0	0	0	0
708	SSL2.50CH01_79461067	SL2.50CH01	79461067	0.16	G	T	0.91206	0.08794	0	0	0	0
709	SSL2.50CH01_79560253	SL2.50CH01	79560253	0.037	C	G	0.98111	0.01889	0	0	0	0
710	SSL2.50CH01_79626101	SL2.50CH01	79626101	0.129	C	T	0.9309	0.0691	0	0	0	0
711	SSL2.50CH01_79626136	SL2.50CH01	79626136	0.061	T	A	0.96859	0.03141	0	0	0	0
712	SSL2.50CH01_79626160	SL2.50CH01	79626160	0.061	A	G	0.96859	0.03141	0	0	0	0
713	SSL2.50CH01_79647837	SL2.50CH01	79647837	0.157	A	G	0.91436	0.08438	0.00126	0	0	0
714	SSL2.50CH01_79647921	SL2.50CH01	79647921	0.047	C	T	0.97601	0.02399	0	0	0	0
715	SSL2.50CH01_79685106	SL2.50CH01	79685106	0.039	A	G	0.97985	0.02015	0	0	0	0
716	SSL2.50CH01_79685122	SL2.50CH01	79685122	0.335	A	G	0.78682	0.21318	0	0	0	0
717	SSL2.50CH01_79722157	SL2.50CH01	79722157	0.027	A	C	0.98618	0.01382	0	0	0	0
718	SSL2.50CH01_79963099	SL2.50CH01	79963099	0.163	T	G	0.91058	0.08942	0	0	0	0
719	SSL2.50CH01_79963115	SL2.50CH01	79963115	0.052	G	A	0.97355	0.02645	0	0	0	0
720	SSL2.50CH01_79963124	SL2.50CH01	79963124	0.155	C	T	0.91562	0.08438	0	0	0	0
721	SSL2.50CH01_79963144	SL2.50CH01	79963144	0.027	T	C	0.98615	0.01385	0	0	0	0
722	SSL2.50CH01_79963148	SL2.50CH01	79963148	0.027	T	C	0.98615	0.01385	0	0	0	0
723	SSL2.50CH01_79963161	SL2.50CH01	79963161	0.08	T	C	0.95844	0.04156	0	0	0	0
724	SSL2.50CH01_79978192	SL2.50CH01	79978192	0.087	T	A	0.95466	0.04534	0	0	0	0
725	SSL2.50CH01_79978219	SL2.50CH01	79978219	0.063	T	C	0.96725	0.03275	0	0	0	0
726	SSL2.50CH01_79978221	SL2.50CH01	79978221	0.082	T	A	0.95718	0.04282	0	0	0	0
727	SSL2.50CH01_79978241	SL2.50CH01	79978241	0.084	A	G	0.95592	0.04408	0	0	0	0
728	SSL2.50CH01_79978259	SL2.50CH01	79978259	0.064	C	T	0.96692	0.03308	0	0	0	0
729	SSL2.50CH01_80065791	SL2.50CH01	80065791	0.014	A	G	0.99286	0.00714	0	0	0	0
730	SSL2.50CH01_80065842	SL2.50CH01	80065842	0.419	A	G	0.70127	0.29873	0	0	0	0
731	SSL2.50CH01_80065844	SL2.50CH01	80065844	0.323	G	A	0.79774	0.20226	0	0	0	0
732	SSL2.50CH01_80124712	SL2.50CH01	80124712	0.222	G	T	0.8728	0.1272	0	0	0	0
733	SSL2.50CH01_80141029	SL2.50CH01	80141029	0.336	C	A	0.78643	0.21357	0	0	0	0
734	SSL2.50CH01_80194352	SL2.50CH01	80194352	0.047	G	A	0.97607	0.02393	0	0	0	0
735	SSL2.50CH01_80262290	SL2.50CH01	80262290	0.158	T	C	0.91353	0.08647	0	0	0	0
736	SSL2.50CH01_80262319	SL2.50CH01	80262319	0.024	C	T	0.988	0.012	0	0	0	0
737	SSL2.50CH01_80262373	SL2.50CH01	80262373	0.005	G	A	0.99749	0.00251	0	0	0	0
738	SSL2.50CH01_80305144	SL2.50CH01	80305144	0.163	A	G	0.91058	0.08942	0	0	0	0
739	SSL2.50CH01_80305156	SL2.50CH01	80305156	0.045	G	A	0.9771	0.0229	0	0	0	0
740	SSL2.50CH01_80305182	SL2.50CH01	80305182	0.087	C	T	0.95466	0.04534	0	0	0	0
741	SSL2.50CH01_80305205	SL2.50CH01	80305205	0.075	A	G	0.96096	0.03904	0	0	0	0
742	SSL2.50CH01_80352500	SL2.50CH01	80352500	0.02	T	A	0.98995	0.01005	0	0	0	0
743	SSL2.50CH01_80444153	SL2.50CH01	80444153	0.051	T	G	0.97362	0.02638	0	0	0	0
744	SSL2.50CH01_80444154	SL2.50CH01	80444154	0.052	A	G	0.97355	0.02645	0	0	0	0
745	SSL2.50CH01_80444170	SL2.50CH01	80444170	0.133	T	G	0.92821	0.07179	0	0	0	0
746	SSL2.50CH01_80495816	SL2.50CH01	80495816	0.14	T	C	0.92424	0.07576	0	0	0	0
747	SSL2.50CH01_80495818	SL2.50CH01	80495818	0.042	A	G	0.97854	0.02146	0	0	0	0
748	SSL2.50CH01_80495867	SL2.50CH01	80495867	0.02	T	G	0.98992	0.01008	0	0	0	0
749	SSL2.50CH01_80527551	SL2.50CH01	80527551	0.162	G	A	0.91103	0.08897	0	0	0	0
750	SSL2.50CH01_80542671	SL2.50CH01	80542671	0.15	T	C	0.91814	0.08186	0	0	0	0
751	SSL2.50CH01_80595074	SL2.50CH01	80595074	0.005	C	T	0.99749	0.00251	0	0	0	0
752	SSL2.50CH01_80595076	SL2.50CH01	80595076	0.005	A	G	0.99749	0.00251	0	0	0	0
753	SSL2.50CH01_80595077	SL2.50CH01	80595077	0.042	C	T	0.97864	0.02136	0	0	0	0
754	SSL2.50CH01_80595114	SL2.50CH01	80595114	0.047	C	A	0.97607	0.02393	0	0	0	0
755	SSL2.50CH01_80595132	SL2.50CH01	80595132	0.084	A	C	0.95592	0.04408	0	0	0	0
756	SSL2.50CH01_80674428	SL2.50CH01	80674428	0.158	A	T	0.91332	0.08668	0	0	0	0
757	SSL2.50CH01_80674483	SL2.50CH01	80674483	0.023	A	T	0.98852	0.01148	0	0	0	0
758	SSL2.50CH01_80765493	SL2.50CH01	80765493	0.158	G	A	0.91353	0.08647	0	0	0	0
759	SSL2.50CH01_80765501	SL2.50CH01	80765501	0.063	G	T	0.96742	0.02882	0.00376	0	0	0
760	SSL2.50CH01_80814796	SL2.50CH01	80814796	0.084	G	T	0.95619	0.04381	0	0	0	0
761	SSL2.50CH01_80814874	SL2.50CH01	80814874	0.072	C	T	0.96282	0.03718	0	0	0	0
762	SSL2.50CH01_80830395	SL2.50CH01	80830395	0.123	G	T	0.93411	0.06589	0	0	0	0
763	SSL2.50CH01_80830420	SL2.50CH01	80830420	0.018	C	G	0.99098	0.00902	0	0	0	0
764	SSL2.50CH01_81113581	SL2.50CH01	81113581	0.073	G	A	0.96212	0.03788	0	0	0	0
765	SSL2.50CH01_81170342	SL2.50CH01	81170342	0.035	T	A	0.98232	0.01768	0	0	0	0
766	SSL2.50CH01_81170387	SL2.50CH01	81170387	0.089	G	A	0.95328	0.04672	0	0	0	0
767	SSL2.50CH01_81215903	SL2.50CH01	81215903	0.154	C	G	0.91604	0.08271	0.00125	0	0	0
768	SSL2.50CH01_81215962	SL2.50CH01	81215962	0.037	T	C	0.9812	0.0188	0	0	0	0
769	SSL2.50CH01_81215970	SL2.50CH01	81215970	0.039	G	A	0.97995	0.02005	0	0	0	0
770	SSL2.50CH01_81260561	SL2.50CH01	81260561	0.102	T	A	0.94584	0.05416	0	0	0	0
771	SSL2.50CH01_81260579	SL2.50CH01	81260579	0.006	A	T	0.9969	0.0031	0	0	0	0
772	SSL2.50CH01_81260580	SL2.50CH01	81260580	0.073	T	C	0.96222	0.03778	0	0	0	0
773	SSL2.50CH01_81618749	SL2.50CH01	81618749	0.037	T	A	0.98116	0.01884	0	0	0	0
774	SSL2.50CH01_81643656	SL2.50CH01	81643656	0.105	T	A	0.94444	0.05556	0	0	0	0
775	SSL2.50CH01_81643661	SL2.50CH01	81643661	0.02	G	A	0.9899	0.0101	0	0	0	0
776	SSL2.50CH01_81676788	SL2.50CH01	81676788	0.044	G	T	0.97733	0.02267	0	0	0	0
777	SSL2.50CH01_81692528	SL2.50CH01	81692528	0.092	C	G	0.95153	0.04847	0	0	0	0
778	SSL2.50CH01_81692596	SL2.50CH01	81692596	0.029	A	T	0.98525	0.01475	0	0	0	0
779	SSL2.50CH01_81692617	SL2.50CH01	81692617	0.028	C	T	0.98597	0.01403	0	0	0	0
780	SSL2.50CH01_81692621	SL2.50CH01	81692621	0.02	A	G	0.98971	0.01029	0	0	0	0
781	SSL2.50CH01_81707711	SL2.50CH01	81707711	0.091	C	G	0.95226	0.04774	0	0	0	0
782	SSL2.50CH01_81707765	SL2.50CH01	81707765	0.075	G	C	0.96123	0.0361	0.00267	0	0	0
783	SSL2.50CH01_81764111	SL2.50CH01	81764111	0.098	C	T	0.94836	0.05164	0	0	0	0
784	SSL2.50CH01_81764186	SL2.50CH01	81764186	0.049	C	T	0.97468	0.02532	0	0	0	0
785	SSL2.50CH01_81779415	SL2.50CH01	81779415	0.102	T	C	0.94598	0.05402	0	0	0	0
786	SSL2.50CH01_81779502	SL2.50CH01	81779502	0.104	T	C	0.94515	0.05485	0	0	0	0
787	SSL2.50CH01_81812467	SL2.50CH01	81812467	0.079	G	A	0.95865	0.04135	0	0	0	0
788	SSL2.50CH01_81812521	SL2.50CH01	81812521	0.109	T	G	0.94236	0.05764	0	0	0	0
789	SSL2.50CH01_81812524	SL2.50CH01	81812524	0.109	T	G	0.94236	0.05764	0	0	0	0
790	SSL2.50CH01_81827498	SL2.50CH01	81827498	0.165	T	C	0.90955	0.09045	0	0	0	0
791	SSL2.50CH01_81867167	SL2.50CH01	81867167	0.089	T	C	0.9534	0.0466	0	0	0	0
792	SSL2.50CH01_81867205	SL2.50CH01	81867205	0.091	T	C	0.95214	0.04786	0	0	0	0
793	SSL2.50CH01_81867209	SL2.50CH01	81867209	0.054	T	A	0.97229	0.02771	0	0	0	0
794	SSL2.50CH01_81887087	SL2.50CH01	81887087	0.182	G	T	0.8985	0.1015	0	0	0	0
795	SSL2.50CH01_81942138	SL2.50CH01	81942138	0.07	C	A	0.96348	0.03652	0	0	0	0
796	SSL2.50CH01_81942219	SL2.50CH01	81942219	0.005	A	T	0.99732	0.00268	0	0	0	0
797	SSL2.50CH01_81965673	SL2.50CH01	81965673	0.051	C	T	0.97368	0.02632	0	0	0	0
798	SSL2.50CH01_81965694	SL2.50CH01	81965694	0.15	G	T	0.91855	0.08145	0	0	0	0
799	SSL2.50CH01_82011441	SL2.50CH01	82011441	0.067	A	G	0.96538	0.03462	0	0	0	0
800	SSL2.50CH01_82011444	SL2.50CH01	82011444	0.077	A	T	0.9597	0.0403	0	0	0	0
801	SSL2.50CH01_82011482	SL2.50CH01	82011482	0.044	G	A	0.97733	0.02267	0	0	0	0
802	SSL2.50CH01_82192968	SL2.50CH01	82192968	0.013	T	A	0.9937	0.0063	0	0	0	0
803	SSL2.50CH01_82192976	SL2.50CH01	82192976	0.024	A	G	0.98794	0.01206	0	0	0	0
804	SSL2.50CH01_82193010	SL2.50CH01	82193010	0.013	C	T	0.99322	0.00678	0	0	0	0
805	SSL2.50CH01_82193026	SL2.50CH01	82193026	0.016	T	C	0.99187	0.00813	0	0	0	0
806	SSL2.50CH01_82208434	SL2.50CH01	82208434	0.098	C	T	0.94859	0.05141	0	0	0	0
807	SSL2.50CH01_82208462	SL2.50CH01	82208462	0.025	A	G	0.98734	0.01266	0	0	0	0
808	SSL2.50CH01_82254217	SL2.50CH01	82254217	0.146	A	T	0.92085	0.07915	0	0	0	0
809	SSL2.50CH01_82326112	SL2.50CH01	82326112	0.068	T	C	0.96456	0.03544	0	0	0	0
810	SSL2.50CH01_82441231	SL2.50CH01	82441231	0.122	T	C	0.93577	0.05164	0.01259	0	0	0
811	SSL2.50CH01_82441294	SL2.50CH01	82441294	0.12	G	A	0.93561	0.06439	0	0	0	0
812	SSL2.50CH01_82457828	SL2.50CH01	82457828	0.051	A	G	0.97368	0.02632	0	0	0	0
813	SSL2.50CH01_82457831	SL2.50CH01	82457831	0.16	A	C	0.91228	0.08772	0	0	0	0
814	SSL2.50CH01_82457888	SL2.50CH01	82457888	0.091	T	A	0.95238	0.04762	0	0	0	0
815	SSL2.50CH01_82457918	SL2.50CH01	82457918	0.046	C	T	0.97619	0.02381	0	0	0	0
816	SSL2.50CH01_82488006	SL2.50CH01	82488006	0.125	C	A	0.93274	0.06726	0	0	0	0
817	SSL2.50CH01_82488081	SL2.50CH01	82488081	0.025	A	T	0.98737	0.01263	0	0	0	0
818	SSL2.50CH01_82507235	SL2.50CH01	82507235	0.463	T	G	0.63693	0.36307	0	0	0	0
819	SSL2.50CH01_82625476	SL2.50CH01	82625476	0.089	C	T	0.95352	0.04648	0	0	0	0
820	SSL2.50CH01_82625492	SL2.50CH01	82625492	0.063	T	C	0.96734	0.03266	0	0	0	0
821	SSL2.50CH01_82625543	SL2.50CH01	82625543	0.03	G	A	0.98469	0.01531	0	0	0	0
822	SSL2.50CH01_82655950	SL2.50CH01	82655950	0.15	G	A	0.91834	0.08166	0	0	0	0
823	SSL2.50CH01_82655993	SL2.50CH01	82655993	0.068	G	A	0.96486	0.03514	0	0	0	0
824	SSL2.50CH01_82705218	SL2.50CH01	82705218	0.116	G	A	0.9383	0.0617	0	0	0	0
825	SSL2.50CH01_82720768	SL2.50CH01	82720768	0.435	A	G	0.68056	0.31944	0	0	0	0
826	SSL2.50CH01_82720789	SL2.50CH01	82720789	0.042	C	T	0.97859	0.02141	0	0	0	0
827	SSL2.50CH01_82792674	SL2.50CH01	82792674	0.486	A	T	0.58291	0.41709	0	0	0	0
828	SSL2.50CH01_82901585	SL2.50CH01	82901585	0.027	C	T	0.98618	0.01382	0	0	0	0
829	SSL2.50CH01_83065167	SL2.50CH01	83065167	0.199	G	A	0.88791	0.11209	0	0	0	0
830	SSL2.50CH01_83065172	SL2.50CH01	83065172	0.035	G	C	0.98237	0.01763	0	0	0	0
831	SSL2.50CH01_83081190	SL2.50CH01	83081190	0.148	A	T	0.9194	0.0806	0	0	0	0
832	SSL2.50CH01_83081219	SL2.50CH01	83081219	0.076	C	T	0.96096	0.02771	0.01134	0	0	0
833	SSL2.50CH01_83115459	SL2.50CH01	83115459	0.052	T	C	0.97328	0.02672	0	0	0	0
834	SSL2.50CH01_83147679	SL2.50CH01	83147679	0.119	A	G	0.93655	0.06345	0	0	0	0
835	SSL2.50CH01_83147702	SL2.50CH01	83147702	0.013	G	A	0.9937	0.0063	0	0	0	0
836	SSL2.50CH01_83163068	SL2.50CH01	83163068	0.057	C	T	0.97089	0.02911	0	0	0	0
837	SSL2.50CH01_83284931	SL2.50CH01	83284931	0.034	T	G	0.98262	0.01738	0	0	0	0
838	SSL2.50CH01_83284947	SL2.50CH01	83284947	0.214	T	C	0.87783	0.12217	0	0	0	0
839	SSL2.50CH01_83284991	SL2.50CH01	83284991	0.062	C	A	0.96819	0.03053	0.00127	0	0	0
840	SSL2.50CH01_83331787	SL2.50CH01	83331787	0.137	C	G	0.92588	0.07412	0	0	0	0
841	SSL2.50CH01_83367718	SL2.50CH01	83367718	0.156	A	G	0.91479	0.08521	0	0	0	0
842	SSL2.50CH01_83406003	SL2.50CH01	83406003	0.005	C	T	0.99749	0.00251	0	0	0	0
843	SSL2.50CH01_83406013	SL2.50CH01	83406013	0.044	C	G	0.97744	0.02256	0	0	0	0
844	SSL2.50CH01_83406064	SL2.50CH01	83406064	0.054	T	C	0.97243	0.02757	0	0	0	0
845	SSL2.50CH01_83515085	SL2.50CH01	83515085	0.165	A	G	0.90955	0.09045	0	0	0	0
846	SSL2.50CH01_83515128	SL2.50CH01	83515128	0.075	T	G	0.96106	0.03894	0	0	0	0
847	SSL2.50CH01_83573176	SL2.50CH01	83573176	0.023	A	G	0.98849	0.01151	0	0	0	0
848	SSL2.50CH01_83573213	SL2.50CH01	83573213	0.064	G	A	0.96675	0.03325	0	0	0	0
849	SSL2.50CH01_83654167	SL2.50CH01	83654167	0.163	C	G	0.91071	0.08929	0	0	0	0
850	SSL2.50CH01_83711152	SL2.50CH01	83711152	0.245	G	T	0.85732	0.14268	0	0	0	0
851	SSL2.50CH01_83890807	SL2.50CH01	83890807	0.158	T	A	0.91332	0.08668	0	0	0	0
852	SSL2.50CH01_83890826	SL2.50CH01	83890826	0.079	A	T	0.95854	0.04146	0	0	0	0
853	SSL2.50CH01_83914392	SL2.50CH01	83914392	0.015	A	G	0.99248	0.00752	0	0	0	0
854	SSL2.50CH01_83961919	SL2.50CH01	83961919	0.12	G	A	0.93561	0.06439	0	0	0	0
855	SSL2.50CH01_83998669	SL2.50CH01	83998669	0.04	T	A	0.9798	0.0202	0	0	0	0
856	SSL2.50CH01_83998675	SL2.50CH01	83998675	0.08	A	G	0.95833	0.04167	0	0	0	0
857	SSL2.50CH01_83998688	SL2.50CH01	83998688	0.025	C	T	0.98741	0.01259	0	0	0	0
858	SSL2.50CH01_83998729	SL2.50CH01	83998729	0.042	T	C	0.97848	0.02152	0	0	0	0
859	SSL2.50CH01_84121136	SL2.50CH01	84121136	0.148	A	G	0.9198	0.0802	0	0	0	0
860	SSL2.50CH01_84121165	SL2.50CH01	84121165	0.034	C	T	0.98246	0.01754	0	0	0	0
861	SSL2.50CH01_84137553	SL2.50CH01	84137553	0.154	T	C	0.91583	0.08417	0	0	0	0
862	SSL2.50CH01_84137556	SL2.50CH01	84137556	0.082	G	T	0.95729	0.04146	0.00126	0	0	0
863	SSL2.50CH01_84137593	SL2.50CH01	84137593	0.062	G	T	0.96819	0.03181	0	0	0	0
864	SSL2.50CH01_84153304	SL2.50CH01	84153304	0.054	A	G	0.97229	0.02393	0.00378	0	0	0
865	SSL2.50CH01_84153306	SL2.50CH01	84153306	0.008	G	T	0.99622	0.00378	0	0	0	0
866	SSL2.50CH01_84153311	SL2.50CH01	84153311	0.129	G	A	0.93073	0.06927	0	0	0	0
867	SSL2.50CH01_84153383	SL2.50CH01	84153383	0.033	A	G	0.98346	0.01654	0	0	0	0
868	SSL2.50CH01_84168406	SL2.50CH01	84168406	0.075	A	G	0.96106	0.03894	0	0	0	0
869	SSL2.50CH01_84168411	SL2.50CH01	84168411	0.146	T	G	0.92085	0.07915	0	0	0	0
870	SSL2.50CH01_84198504	SL2.50CH01	84198504	0.163	A	G	0.91058	0.08942	0	0	0	0
871	SSL2.50CH01_84275192	SL2.50CH01	84275192	0.015	G	A	0.99246	0.00754	0	0	0	0
872	SSL2.50CH01_84275203	SL2.50CH01	84275203	0.15	C	T	0.91834	0.08166	0	0	0	0
873	SSL2.50CH01_84275215	SL2.50CH01	84275215	0.063	C	T	0.96725	0.03275	0	0	0	0
874	SSL2.50CH01_84275216	SL2.50CH01	84275216	0.056	G	A	0.97111	0.02889	0	0	0	0
875	SSL2.50CH01_84275217	SL2.50CH01	84275217	0.056	C	G	0.97111	0.02889	0	0	0	0
876	SSL2.50CH01_84275287	SL2.50CH01	84275287	0.142	C	T	0.92337	0.07663	0	0	0	0
877	SSL2.50CH01_84292740	SL2.50CH01	84292740	0.11	T	C	0.94148	0.05852	0	0	0	0
878	SSL2.50CH01_84435378	SL2.50CH01	84435378	0.142	A	T	0.92298	0.07702	0	0	0	0
879	SSL2.50CH01_84450448	SL2.50CH01	84450448	0.158	G	A	0.91332	0.08668	0	0	0	0
880	SSL2.50CH01_84468487	SL2.50CH01	84468487	0.044	C	T	0.97727	0.02273	0	0	0	0
881	SSL2.50CH01_84561611	SL2.50CH01	84561611	0.07	C	G	0.96357	0.03643	0	0	0	0
882	SSL2.50CH01_84561612	SL2.50CH01	84561612	0.07	C	T	0.96357	0.03643	0	0	0	0
883	SSL2.50CH01_84561615	SL2.50CH01	84561615	0.114	T	C	0.93935	0.06065	0	0	0	0
884	SSL2.50CH01_84561618	SL2.50CH01	84561618	0.073	G	A	0.96231	0.03769	0	0	0	0
885	SSL2.50CH01_84561650	SL2.50CH01	84561650	0.073	G	A	0.96222	0.03526	0.00252	0	0	0
886	SSL2.50CH01_84561659	SL2.50CH01	84561659	0.028	C	T	0.98555	0.01445	0	0	0	0
887	SSL2.50CH01_84561666	SL2.50CH01	84561666	0.066	A	G	0.96599	0.03401	0	0	0	0
888	SSL2.50CH01_84561687	SL2.50CH01	84561687	0.068	G	C	0.96465	0.03535	0	0	0	0
889	SSL2.50CH01_84614279	SL2.50CH01	84614279	0.16	T	A	0.91421	0.06434	0.02145	0	0	0
890	SSL2.50CH01_84614301	SL2.50CH01	84614301	0.159	T	C	0.9131	0.0869	0	0	0	0
891	SSL2.50CH01_84632258	SL2.50CH01	84632258	0.044	T	C	0.97744	0.02256	0	0	0	0
892	SSL2.50CH01_84632273	SL2.50CH01	84632273	0.126	G	A	0.93233	0.06767	0	0	0	0
893	SSL2.50CH01_84717708	SL2.50CH01	84717708	0.1	T	A	0.94697	0.05303	0	0	0	0
894	SSL2.50CH01_84717710	SL2.50CH01	84717710	0.059	C	A	0.9697	0.0303	0	0	0	0
895	SSL2.50CH01_84717728	SL2.50CH01	84717728	0.059	T	A	0.9697	0.0303	0	0	0	0
896	SSL2.50CH01_84733098	SL2.50CH01	84733098	0.118	C	T	0.93703	0.06297	0	0	0	0
897	SSL2.50CH01_84733110	SL2.50CH01	84733110	0.037	G	A	0.98116	0.01884	0	0	0	0
898	SSL2.50CH01_84825376	SL2.50CH01	84825376	0.107	A	G	0.94347	0.05653	0	0	0	0
899	SSL2.50CH01_84993299	SL2.50CH01	84993299	0.166	A	T	0.90852	0.09148	0	0	0	0
900	SSL2.50CH01_84993360	SL2.50CH01	84993360	0.009	C	T	0.99573	0.00427	0	0	0	0
901	SSL2.50CH01_85032911	SL2.50CH01	85032911	0.022	C	T	0.98869	0.01131	0	0	0	0
902	SSL2.50CH01_85032951	SL2.50CH01	85032951	0.073	C	A	0.96222	0.03778	0	0	0	0
903	SSL2.50CH01_85032952	SL2.50CH01	85032952	0.063	C	T	0.96725	0.03275	0	0	0	0
904	SSL2.50CH01_85032955	SL2.50CH01	85032955	0.063	A	T	0.96725	0.03275	0	0	0	0
905	SSL2.50CH01_85032974	SL2.50CH01	85032974	0.008	T	C	0.99623	0.00377	0	0	0	0
906	SSL2.50CH01_85115211	SL2.50CH01	85115211	0.044	A	G	0.97733	0.02267	0	0	0	0
907	SSL2.50CH01_85131333	SL2.50CH01	85131333	0.162	C	G	0.91184	0.0806	0.00756	0	0	0
908	SSL2.50CH01_85131402	SL2.50CH01	85131402	0.054	A	G	0.97201	0.02672	0.00127	0	0	0
909	SSL2.50CH01_85221472	SL2.50CH01	85221472	0.075	C	A	0.96106	0.03894	0	0	0	0
910	SSL2.50CH01_85221482	SL2.50CH01	85221482	0.26	C	T	0.84673	0.15327	0	0	0	0
911	SSL2.50CH01_85314156	SL2.50CH01	85314156	0.042	A	T	0.97864	0.02136	0	0	0	0
912	SSL2.50CH01_85314170	SL2.50CH01	85314170	0.158	T	C	0.91332	0.08668	0	0	0	0
913	SSL2.50CH01_85314238	SL2.50CH01	85314238	0.07	A	C	0.96348	0.03652	0	0	0	0
914	SSL2.50CH01_85351601	SL2.50CH01	85351601	0.477	C	T	0.60705	0.39295	0	0	0	0
915	SSL2.50CH01_85351627	SL2.50CH01	85351627	0.07	T	A	0.96357	0.03643	0	0	0	0
916	SSL2.50CH01_85351657	SL2.50CH01	85351657	0.025	C	A	0.98741	0.01259	0	0	0	0
917	SSL2.50CH01_85381871	SL2.50CH01	85381871	0.139	C	A	0.92481	0.07519	0	0	0	0
918	SSL2.50CH01_85397613	SL2.50CH01	85397613	0.125	A	T	0.93299	0.06701	0	0	0	0
919	SSL2.50CH01_85397615	SL2.50CH01	85397615	0.033	A	G	0.98325	0.01675	0	0	0	0
920	SSL2.50CH01_85397695	SL2.50CH01	85397695	0.077	T	C	0.9597	0.0403	0	0	0	0
921	SSL2.50CH01_85442809	SL2.50CH01	85442809	0.022	C	T	0.98872	0.01128	0	0	0	0
922	SSL2.50CH01_85442850	SL2.50CH01	85442850	0.017	G	T	0.99145	0.00855	0	0	0	0
923	SSL2.50CH01_85442853	SL2.50CH01	85442853	0.058	A	G	0.96985	0.03015	0	0	0	0
924	SSL2.50CH01_85442872	SL2.50CH01	85442872	0.01	C	T	0.99499	0.00501	0	0	0	0
925	SSL2.50CH01_85442873	SL2.50CH01	85442873	0.072	C	A	0.96241	0.03759	0	0	0	0
926	SSL2.50CH01_85466357	SL2.50CH01	85466357	0.142	A	G	0.92337	0.07663	0	0	0	0
927	SSL2.50CH01_85466423	SL2.50CH01	85466423	0.022	G	A	0.98869	0.01131	0	0	0	0
928	SSL2.50CH01_85497427	SL2.50CH01	85497427	0.11	C	T	0.94133	0.05867	0	0	0	0
929	SSL2.50CH01_85497473	SL2.50CH01	85497473	0.003	T	A	0.99873	0.00127	0	0	0	0
930	SSL2.50CH01_85619013	SL2.50CH01	85619013	0.175	G	A	0.90302	0.09698	0	0	0	0
931	SSL2.50CH01_85703749	SL2.50CH01	85703749	0.071	T	A	0.96348	0.03149	0.00504	0	0	0
932	SSL2.50CH01_85703760	SL2.50CH01	85703760	0.063	G	A	0.96725	0.03275	0	0	0	0
933	SSL2.50CH01_85703845	SL2.50CH01	85703845	0.003	A	G	0.99866	0.00134	0	0	0	0
934	SSL2.50CH01_85742429	SL2.50CH01	85742429	0.154	A	G	0.91583	0.08417	0	0	0	0
935	SSL2.50CH01_85857592	SL2.50CH01	85857592	0.159	T	C	0.9131	0.0869	0	0	0	0
936	SSL2.50CH01_85914674	SL2.50CH01	85914674	0.13	A	G	0.93038	0.06962	0	0	0	0
937	SSL2.50CH01_85929839	SL2.50CH01	85929839	0.006	G	A	0.99692	0.00308	0	0	0	0
938	SSL2.50CH01_85962208	SL2.50CH01	85962208	0.16	A	G	0.91206	0.08794	0	0	0	0
939	SSL2.50CH01_85962285	SL2.50CH01	85962285	0.061	A	C	0.96827	0.03173	0	0	0	0
940	SSL2.50CH01_86025617	SL2.50CH01	86025617	0.089	C	A	0.95363	0.03759	0.00627	0.00251	0	0
941	SSL2.50CH01_86025637	SL2.50CH01	86025637	0.158	A	G	0.91353	0.08647	0	0	0	0
942	SSL2.50CH01_86025641	SL2.50CH01	86025641	0.063	A	T	0.96742	0.03258	0	0	0	0
943	SSL2.50CH01_86025663	SL2.50CH01	86025663	0.042	T	C	0.9787	0.0213	0	0	0	0
944	SSL2.50CH01_86041625	SL2.50CH01	86041625	0.102	C	T	0.94598	0.05402	0	0	0	0
945	SSL2.50CH01_86041637	SL2.50CH01	86041637	0.066	G	A	0.96608	0.03392	0	0	0	0
946	SSL2.50CH01_86041652	SL2.50CH01	86041652	0.054	C	T	0.97236	0.02764	0	0	0	0
947	SSL2.50CH01_86041653	SL2.50CH01	86041653	0.102	T	C	0.94598	0.05402	0	0	0	0
948	SSL2.50CH01_86093661	SL2.50CH01	86093661	0.12	G	A	0.93577	0.06423	0	0	0	0
949	SSL2.50CH01_86093713	SL2.50CH01	86093713	0.03	G	C	0.98489	0.01511	0	0	0	0
950	SSL2.50CH01_86108850	SL2.50CH01	86108850	0.141	T	G	0.92356	0.07644	0	0	0	0
951	SSL2.50CH01_86108876	SL2.50CH01	86108876	0.056	T	A	0.97118	0.02882	0	0	0	0
952	SSL2.50CH01_86125100	SL2.50CH01	86125100	0.133	G	C	0.92839	0.07161	0	0	0	0
953	SSL2.50CH01_86125128	SL2.50CH01	86125128	0.086	C	T	0.95477	0.04523	0	0	0	0
954	SSL2.50CH01_86125163	SL2.50CH01	86125163	0.037	T	A	0.98128	0.01872	0	0	0	0
955	SSL2.50CH01_86182719	SL2.50CH01	86182719	0.163	C	T	0.91067	0.08933	0	0	0	0
956	SSL2.50CH01_86288981	SL2.50CH01	86288981	0.096	G	A	0.94937	0.05063	0	0	0	0
957	SSL2.50CH01_86315432	SL2.50CH01	86315432	0.102	A	T	0.94615	0.05385	0	0	0	0
958	SSL2.50CH01_86315444	SL2.50CH01	86315444	0.038	A	G	0.98082	0.01918	0	0	0	0
959	SSL2.50CH01_86352725	SL2.50CH01	86352725	0.032	T	C	0.98367	0.01633	0	0	0	0
960	SSL2.50CH01_86352744	SL2.50CH01	86352744	0.16	G	A	0.91206	0.08794	0	0	0	0
961	SSL2.50CH01_86385036	SL2.50CH01	86385036	0.162	A	T	0.9108	0.0892	0	0	0	0
962	SSL2.50CH01_86453892	SL2.50CH01	86453892	0.106	A	T	0.94361	0.05639	0	0	0	0
963	SSL2.50CH01_86453928	SL2.50CH01	86453928	0.054	C	G	0.97243	0.02757	0	0	0	0
964	SSL2.50CH01_86469892	SL2.50CH01	86469892	0.348	C	T	0.77582	0.22418	0	0	0	0
965	SSL2.50CH01_86547048	SL2.50CH01	86547048	0.171	A	C	0.90578	0.09422	0	0	0	0
966	SSL2.50CH01_86599070	SL2.50CH01	86599070	0.479	G	T	0.60202	0.39798	0	0	0	0
967	SSL2.50CH01_86631946	SL2.50CH01	86631946	0.054	G	A	0.97236	0.02764	0	0	0	0
968	SSL2.50CH01_86631952	SL2.50CH01	86631952	0.079	C	T	0.95854	0.04146	0	0	0	0
969	SSL2.50CH01_86631970	SL2.50CH01	86631970	0.027	T	A	0.98618	0.01382	0	0	0	0
970	SSL2.50CH01_86632031	SL2.50CH01	86632031	0.032	C	A	0.98396	0.01604	0	0	0	0
971	SSL2.50CH01_86632037	SL2.50CH01	86632037	0.075	G	C	0.96106	0.03894	0	0	0	0
972	SSL2.50CH01_86650819	SL2.50CH01	86650819	0.002	A	T	0.99875	0.00125	0	0	0	0
973	SSL2.50CH01_86650828	SL2.50CH01	86650828	0.158	T	C	0.91353	0.08647	0	0	0	0
974	SSL2.50CH01_86742043	SL2.50CH01	86742043	0.344	A	C	0.77892	0.22108	0	0	0	0
975	SSL2.50CH01_86742044	SL2.50CH01	86742044	0.027	A	T	0.98618	0.01382	0	0	0	0
976	SSL2.50CH01_86742046	SL2.50CH01	86742046	0.077	C	T	0.9598	0.0402	0	0	0	0
977	SSL2.50CH01_86742051	SL2.50CH01	86742051	0.051	C	A	0.97362	0.02638	0	0	0	0
978	SSL2.50CH01_86757141	SL2.50CH01	86757141	0.135	A	T	0.92695	0.07305	0	0	0	0
979	SSL2.50CH01_86757144	SL2.50CH01	86757144	0.03	A	T	0.98489	0.01511	0	0	0	0
980	SSL2.50CH01_86757211	SL2.50CH01	86757211	0.056	T	C	0.97103	0.02897	0	0	0	0
981	SSL2.50CH01_86757212	SL2.50CH01	86757212	0.056	G	A	0.97103	0.02897	0	0	0	0
982	SSL2.50CH01_86772474	SL2.50CH01	86772474	0.162	C	A	0.9108	0.0892	0	0	0	0
983	SSL2.50CH01_86811458	SL2.50CH01	86811458	0.165	T	A	0.90955	0.09045	0	0	0	0
984	SSL2.50CH01_86811473	SL2.50CH01	86811473	0.065	G	A	0.96658	0.03342	0	0	0	0
985	SSL2.50CH01_86856085	SL2.50CH01	86856085	0.161	C	T	0.91184	0.08816	0	0	0	0
986	SSL2.50CH01_86856100	SL2.50CH01	86856100	0.129	T	C	0.93056	0.06944	0	0	0	0
987	SSL2.50CH01_86856126	SL2.50CH01	86856126	0.163	G	T	0.91058	0.08942	0	0	0	0
988	SSL2.50CH01_86856173	SL2.50CH01	86856173	0.052	C	T	0.97335	0.02665	0	0	0	0
989	SSL2.50CH01_86871242	SL2.50CH01	86871242	0.047	C	T	0.97613	0.02261	0.00126	0	0	0
990	SSL2.50CH01_86917784	SL2.50CH01	86917784	0.082	T	A	0.95696	0.04304	0	0	0	0
991	SSL2.50CH01_86917859	SL2.50CH01	86917859	0.015	T	C	0.99224	0.00776	0	0	0	0
992	SSL2.50CH01_86934006	SL2.50CH01	86934006	0.175	T	C	0.90327	0.09673	0	0	0	0
993	SSL2.50CH01_86934054	SL2.50CH01	86934054	0.091	A	G	0.95226	0.04774	0	0	0	0
994	SSL2.50CH01_86983365	SL2.50CH01	86983365	0.212	T	C	0.8794	0.1206	0	0	0	0
995	SSL2.50CH01_86983421	SL2.50CH01	86983421	0.058	T	G	0.96985	0.03015	0	0	0	0
996	SSL2.50CH01_86983430	SL2.50CH01	86983430	0.025	C	T	0.98714	0.01286	0	0	0	0
997	SSL2.50CH01_87113346	SL2.50CH01	87113346	0.191	G	A	0.89322	0.10678	0	0	0	0
998	SSL2.50CH01_87128474	SL2.50CH01	87128474	0.042	G	C	0.97854	0.02146	0	0	0	0
999	SSL2.50CH01_87161537	SL2.50CH01	87161537	0.15	C	A	0.91855	0.08145	0	0	0	0
1000	SSL2.50CH01_87196209	SL2.50CH01	87196209	0.095	T	G	0.94975	0.05025	0	0	0	0
1001	SSL2.50CH01_87196244	SL2.50CH01	87196244	0.079	G	A	0.95854	0.04146	0	0	0	0
1002	SSL2.50CH01_87319964	SL2.50CH01	87319964	0.068	A	G	0.96474	0.03526	0	0	0	0
1003	SSL2.50CH01_87320006	SL2.50CH01	87320006	0.182	T	G	0.90176	0.06423	0.03401	0	0	0
1004	SSL2.50CH01_87320045	SL2.50CH01	87320045	0.135	G	A	0.92695	0.07305	0	0	0	0
1005	SSL2.50CH01_87320054	SL2.50CH01	87320054	0.135	G	A	0.92695	0.07305	0	0	0	0
1006	SSL2.50CH01_87361874	SL2.50CH01	87361874	0.03	T	C	0.98496	0.01504	0	0	0	0
1007	SSL2.50CH01_87361907	SL2.50CH01	87361907	0.087	G	C	0.95489	0.03008	0.01504	0	0	0
1008	SSL2.50CH01_87361943	SL2.50CH01	87361943	0.086	C	T	0.95489	0.04511	0	0	0	0
1009	SSL2.50CH01_87361972	SL2.50CH01	87361972	0.083	T	A	0.95663	0.04337	0	0	0	0
1010	SSL2.50CH01_87380399	SL2.50CH01	87380399	0.047	A	G	0.97613	0.02387	0	0	0	0
1011	SSL2.50CH01_87380415	SL2.50CH01	87380415	0.059	A	T	0.96985	0.02638	0.00377	0	0	0
1012	SSL2.50CH01_87380429	SL2.50CH01	87380429	0.051	T	A	0.97362	0.02638	0	0	0	0
1013	SSL2.50CH01_87380446	SL2.50CH01	87380446	0.084	T	G	0.95603	0.04397	0	0	0	0
1014	SSL2.50CH01_87467937	SL2.50CH01	87467937	0.039	C	G	0.9799	0.0201	0	0	0	0
1015	SSL2.50CH01_87467938	SL2.50CH01	87467938	0.133	A	G	0.92839	0.07161	0	0	0	0
1016	SSL2.50CH01_87467997	SL2.50CH01	87467997	0.047	G	A	0.97613	0.02387	0	0	0	0
1017	SSL2.50CH01_87468003	SL2.50CH01	87468003	0.126	G	C	0.93216	0.06784	0	0	0	0
1018	SSL2.50CH01_87485244	SL2.50CH01	87485244	0.165	G	C	0.90955	0.09045	0	0	0	0
1019	SSL2.50CH01_87523414	SL2.50CH01	87523414	0.116	A	G	0.93813	0.06187	0	0	0	0
1020	SSL2.50CH01_87561375	SL2.50CH01	87561375	0.125	A	G	0.93316	0.06684	0	0	0	0
1021	SSL2.50CH01_87612173	SL2.50CH01	87612173	0.054	T	G	0.97243	0.02757	0	0	0	0
1022	SSL2.50CH01_87612174	SL2.50CH01	87612174	0.033	T	C	0.98318	0.01682	0	0	0	0
1023	SSL2.50CH01_87612177	SL2.50CH01	87612177	0.012	G	A	0.99372	0.00628	0	0	0	0
1024	SSL2.50CH01_87612187	SL2.50CH01	87612187	0.054	C	T	0.97243	0.02757	0	0	0	0
1025	SSL2.50CH01_87612188	SL2.50CH01	87612188	0.012	A	G	0.99373	0.00627	0	0	0	0
1026	SSL2.50CH01_87612239	SL2.50CH01	87612239	0.16	G	T	0.91228	0.08772	0	0	0	0
1027	SSL2.50CH01_87692713	SL2.50CH01	87692713	0.089	A	G	0.9534	0.0466	0	0	0	0
1028	SSL2.50CH01_87692714	SL2.50CH01	87692714	0.063	A	G	0.96725	0.03275	0	0	0	0
1029	SSL2.50CH01_87692722	SL2.50CH01	87692722	0.047	C	T	0.97568	0.02432	0	0	0	0
1030	SSL2.50CH01_87692745	SL2.50CH01	87692745	0.045	G	C	0.97703	0.02297	0	0	0	0
1031	SSL2.50CH01_87692750	SL2.50CH01	87692750	0.042	T	A	0.97859	0.01889	0.00252	0	0	0
1032	SSL2.50CH01_87692764	SL2.50CH01	87692764	0.155	A	T	0.91562	0.08438	0	0	0	0
1033	SSL2.50CH01_87692765	SL2.50CH01	87692765	0.044	A	T	0.97733	0.02267	0	0	0	0
1034	SSL2.50CH01_87790722	SL2.50CH01	87790722	0.091	C	A	0.95226	0.04774	0	0	0	0
1035	SSL2.50CH01_87832786	SL2.50CH01	87832786	0.04	G	T	0.97975	0.02025	0	0	0	0
1036	SSL2.50CH01_87832825	SL2.50CH01	87832825	0.049	C	T	0.97468	0.02532	0	0	0	0
1037	SSL2.50CH01_87866374	SL2.50CH01	87866374	0.158	A	C	0.91353	0.08647	0	0	0	0
1038	SSL2.50CH01_87912427	SL2.50CH01	87912427	0.157	G	T	0.91436	0.08564	0	0	0	0
1039	SSL2.50CH01_87912469	SL2.50CH01	87912469	0.148	G	A	0.9196	0.0804	0	0	0	0
1040	SSL2.50CH01_87969126	SL2.50CH01	87969126	0.144	G	A	0.92211	0.07789	0	0	0	0
1041	SSL2.50CH01_87969143	SL2.50CH01	87969143	0.056	C	G	0.97111	0.02889	0	0	0	0
1042	SSL2.50CH01_88017968	SL2.50CH01	88017968	0.167	T	A	0.90806	0.09194	0	0	0	0
1043	SSL2.50CH01_88018004	SL2.50CH01	88018004	0.082	A	C	0.95718	0.04282	0	0	0	0
1044	SSL2.50CH01_88049077	SL2.50CH01	88049077	0.096	A	G	0.94935	0.04805	0.0026	0	0	0
1045	SSL2.50CH01_88064809	SL2.50CH01	88064809	0.047	A	T	0.97613	0.02387	0	0	0	0
1046	SSL2.50CH01_88108003	SL2.50CH01	88108003	0.003	T	C	0.99845	0.00155	0	0	0	0
1047	SSL2.50CH01_88108007	SL2.50CH01	88108007	0.14	C	T	0.92424	0.07576	0	0	0	0
1048	SSL2.50CH01_88108027	SL2.50CH01	88108027	0.003	T	C	0.99845	0.00155	0	0	0	0
1049	SSL2.50CH01_88174740	SL2.50CH01	88174740	0.084	T	A	0.95614	0.04386	0	0	0	0
1050	SSL2.50CH01_88174762	SL2.50CH01	88174762	0.044	A	C	0.97744	0.02256	0	0	0	0
1051	SSL2.50CH01_88174826	SL2.50CH01	88174826	0.037	T	A	0.98128	0.01872	0	0	0	0
1052	SSL2.50CH01_88196793	SL2.50CH01	88196793	0.056	G	A	0.97103	0.02897	0	0	0	0
1053	SSL2.50CH01_88196800	SL2.50CH01	88196800	0.152	C	G	0.91688	0.08312	0	0	0	0
1054	SSL2.50CH01_88196886	SL2.50CH01	88196886	0.07	C	T	0.96371	0.03629	0	0	0	0
1055	SSL2.50CH01_88212997	SL2.50CH01	88212997	0.183	G	T	0.89824	0.10176	0	0	0	0
1056	SSL2.50CH01_88244822	SL2.50CH01	88244822	0.077	G	A	0.9597	0.0403	0	0	0	0
1057	SSL2.50CH01_88292950	SL2.50CH01	88292950	0.165	A	C	0.90932	0.09068	0	0	0	0
1058	SSL2.50CH01_88293005	SL2.50CH01	88293005	0.073	C	T	0.96231	0.03769	0	0	0	0
1059	SSL2.50CH01_88307961	SL2.50CH01	88307961	0.139	T	G	0.92481	0.07519	0	0	0	0
1060	SSL2.50CH01_88308018	SL2.50CH01	88308018	0.065	C	T	0.96617	0.03383	0	0	0	0
1061	SSL2.50CH01_88338298	SL2.50CH01	88338298	0.049	C	A	0.97475	0.02525	0	0	0	0
1062	SSL2.50CH01_88338381	SL2.50CH01	88338381	0.031	T	A	0.9842	0.0158	0	0	0	0
1063	SSL2.50CH01_88404538	SL2.50CH01	88404538	0.096	T	C	0.94962	0.05038	0	0	0	0
1064	SSL2.50CH01_88404547	SL2.50CH01	88404547	0.039	T	C	0.97985	0.02015	0	0	0	0
1065	SSL2.50CH01_88436271	SL2.50CH01	88436271	0.047	T	C	0.97589	0.02411	0	0	0	0
1066	SSL2.50CH01_88453159	SL2.50CH01	88453159	0.181	T	C	0.8995	0.1005	0	0	0	0
1067	SSL2.50CH01_88516238	SL2.50CH01	88516238	0.027	T	A	0.98607	0.01393	0	0	0	0
1068	SSL2.50CH01_88516249	SL2.50CH01	88516249	0.15	T	G	0.91834	0.08166	0	0	0	0
1069	SSL2.50CH01_88516271	SL2.50CH01	88516271	0.075	C	T	0.96106	0.03894	0	0	0	0
1070	SSL2.50CH01_88516273	SL2.50CH01	88516273	0.15	C	T	0.91834	0.08166	0	0	0	0
1071	SSL2.50CH01_88516307	SL2.50CH01	88516307	0.084	G	C	0.95603	0.04397	0	0	0	0
1072	SSL2.50CH01_88559036	SL2.50CH01	88559036	0.309	A	G	0.80879	0.19121	0	0	0	0
1073	SSL2.50CH01_88575837	SL2.50CH01	88575837	0.152	T	C	0.91729	0.08271	0	0	0	0
1074	SSL2.50CH01_88593347	SL2.50CH01	88593347	0.089	C	T	0.95328	0.04672	0	0	0	0
1075	SSL2.50CH01_88626843	SL2.50CH01	88626843	0.013	G	T	0.9937	0.0063	0	0	0	0
1076	SSL2.50CH01_88626882	SL2.50CH01	88626882	0.082	G	T	0.95718	0.04282	0	0	0	0
1077	SSL2.50CH01_88626920	SL2.50CH01	88626920	0.078	A	G	0.9596	0.0404	0	0	0	0
1078	SSL2.50CH01_88658727	SL2.50CH01	88658727	0.057	T	C	0.97074	0.02926	0	0	0	0
1079	SSL2.50CH01_88658729	SL2.50CH01	88658729	0.04	A	C	0.97975	0.02025	0	0	0	0
1080	SSL2.50CH01_88658777	SL2.50CH01	88658777	0.025	C	T	0.98731	0.01269	0	0	0	0
1081	SSL2.50CH01_88658791	SL2.50CH01	88658791	0.038	A	G	0.98082	0.01918	0	0	0	0
1082	SSL2.50CH01_88677408	SL2.50CH01	88677408	0.025	G	A	0.98744	0.01256	0	0	0	0
1083	SSL2.50CH01_88677460	SL2.50CH01	88677460	0.047	C	T	0.97613	0.02387	0	0	0	0
1084	SSL2.50CH01_88724797	SL2.50CH01	88724797	0.167	T	C	0.90806	0.09194	0	0	0	0
1085	SSL2.50CH01_88724869	SL2.50CH01	88724869	0.042	A	G	0.97854	0.02146	0	0	0	0
1086	SSL2.50CH01_88760871	SL2.50CH01	88760871	0.205	A	G	0.88413	0.11587	0	0	0	0
1087	SSL2.50CH01_88760928	SL2.50CH01	88760928	0.09	A	G	0.95283	0.04582	0.00135	0	0	0
1088	SSL2.50CH01_88760934	SL2.50CH01	88760934	0.084	A	G	0.95603	0.04397	0	0	0	0
1089	SSL2.50CH01_88781854	SL2.50CH01	88781854	0.083	A	C	0.95674	0.04326	0	0	0	0
1090	SSL2.50CH01_88781923	SL2.50CH01	88781923	0.052	G	A	0.97328	0.02672	0	0	0	0
1091	SSL2.50CH01_88797918	SL2.50CH01	88797918	0.084	A	G	0.95614	0.04386	0	0	0	0
1092	SSL2.50CH01_88797927	SL2.50CH01	88797927	0.075	G	A	0.96106	0.03894	0	0	0	0
1093	SSL2.50CH01_88904892	SL2.50CH01	88904892	0.128	C	T	0.93112	0.06888	0	0	0	0
1094	SSL2.50CH01_88904900	SL2.50CH01	88904900	0.042	A	G	0.97832	0.02168	0	0	0	0
1095	SSL2.50CH01_88937625	SL2.50CH01	88937625	0.397	A	G	0.72739	0.27261	0	0	0	0
1096	SSL2.50CH01_88937647	SL2.50CH01	88937647	0.012	T	C	0.99373	0.00627	0	0	0	0
1097	SSL2.50CH01_88937699	SL2.50CH01	88937699	0.012	G	C	0.99373	0.00627	0	0	0	0
1098	SSL2.50CH01_88978614	SL2.50CH01	88978614	0.135	C	T	0.9273	0.0727	0	0	0	0
1099	SSL2.50CH01_88978675	SL2.50CH01	88978675	0.035	A	T	0.98214	0.01786	0	0	0	0
1100	SSL2.50CH01_88993636	SL2.50CH01	88993636	0.02	A	T	0.99	0.01	0	0	0	0
1101	SSL2.50CH01_89025143	SL2.50CH01	89025143	0.138	T	G	0.92532	0.07468	0	0	0	0
1102	SSL2.50CH01_89025211	SL2.50CH01	89025211	0.085	T	A	0.9557	0.0443	0	0	0	0
1103	SSL2.50CH01_89025223	SL2.50CH01	89025223	0.087	C	T	0.95443	0.04557	0	0	0	0
1104	SSL2.50CH01_89025237	SL2.50CH01	89025237	0.049	G	T	0.97468	0.02532	0	0	0	0
1105	SSL2.50CH01_89040615	SL2.50CH01	89040615	0.02	C	T	0.98991	0.01009	0	0	0	0
1106	SSL2.50CH01_89040616	SL2.50CH01	89040616	0.084	T	C	0.95603	0.04397	0	0	0	0
1107	SSL2.50CH01_89040627	SL2.50CH01	89040627	0.395	T	A	0.72864	0.27136	0	0	0	0
1108	SSL2.50CH01_89040651	SL2.50CH01	89040651	0.03	A	G	0.98492	0.01508	0	0	0	0
1109	SSL2.50CH01_89108103	SL2.50CH01	89108103	0.168	T	C	0.90727	0.09273	0	0	0	0
1110	SSL2.50CH01_89108128	SL2.50CH01	89108128	0.027	C	T	0.98622	0.01378	0	0	0	0
1111	SSL2.50CH01_89277185	SL2.50CH01	89277185	0.114	A	G	0.93956	0.06044	0	0	0	0
1112	SSL2.50CH01_89359893	SL2.50CH01	89359893	0.137	G	A	0.92607	0.07393	0	0	0	0
1113	SSL2.50CH01_89359938	SL2.50CH01	89359938	0.084	C	T	0.95614	0.04386	0	0	0	0
1114	SSL2.50CH01_89359971	SL2.50CH01	89359971	0.043	G	A	0.97826	0.02174	0	0	0	0
1115	SSL2.50CH01_89359980	SL2.50CH01	89359980	0.098	G	A	0.94847	0.05153	0	0	0	0
1116	SSL2.50CH01_89430660	SL2.50CH01	89430660	0.022	G	C	0.98864	0.01136	0	0	0	0
1117	SSL2.50CH01_89430703	SL2.50CH01	89430703	0.042	C	T	0.97854	0.02146	0	0	0	0
1118	SSL2.50CH01_89430728	SL2.50CH01	89430728	0.394	T	C	0.7298	0.2702	0	0	0	0
1119	SSL2.50CH01_89510358	SL2.50CH01	89510358	0.174	T	C	0.90351	0.09649	0	0	0	0
1120	SSL2.50CH01_89510359	SL2.50CH01	89510359	0.068	G	A	0.96491	0.03509	0	0	0	0
1121	SSL2.50CH01_89510379	SL2.50CH01	89510379	0.084	A	G	0.95584	0.04416	0	0	0	0
1122	SSL2.50CH01_89510448	SL2.50CH01	89510448	0.012	T	C	0.99373	0.00627	0	0	0	0
1123	SSL2.50CH01_89542124	SL2.50CH01	89542124	0.089	C	A	0.95328	0.04672	0	0	0	0
1124	SSL2.50CH01_89542133	SL2.50CH01	89542133	0.068	A	T	0.96486	0.03514	0	0	0	0
1125	SSL2.50CH01_89542182	SL2.50CH01	89542182	0.08	A	T	0.95844	0.04156	0	0	0	0
1126	SSL2.50CH01_89653590	SL2.50CH01	89653590	0.094	C	G	0.95088	0.04408	0.00504	0	0	0
1127	SSL2.50CH01_89668618	SL2.50CH01	89668618	0.148	C	T	0.9196	0.0804	0	0	0	0
1128	SSL2.50CH01_89668706	SL2.50CH01	89668706	0.032	C	T	0.98378	0.01622	0	0	0	0
1129	SSL2.50CH01_89805464	SL2.50CH01	89805464	0.165	C	T	0.90955	0.09045	0	0	0	0
1130	SSL2.50CH01_89805473	SL2.50CH01	89805473	0.077	C	T	0.9598	0.0402	0	0	0	0
1131	SSL2.50CH01_89805485	SL2.50CH01	89805485	0.087	A	G	0.95418	0.04582	0	0	0	0
1132	SSL2.50CH01_89984657	SL2.50CH01	89984657	0.042	A	G	0.97859	0.02141	0	0	0	0
1133	SSL2.50CH01_89984672	SL2.50CH01	89984672	0.446	A	C	0.6644	0.3356	0	0	0	0
1134	SSL2.50CH01_89984674	SL2.50CH01	89984674	0.073	G	A	0.96222	0.03778	0	0	0	0
1135	SSL2.50CH01_89984707	SL2.50CH01	89984707	0.133	T	A	0.92821	0.07179	0	0	0	0
1136	SSL2.50CH01_89984710	SL2.50CH01	89984710	0.073	A	G	0.96222	0.03778	0	0	0	0
1137	SSL2.50CH01_89984718	SL2.50CH01	89984718	0.073	T	C	0.96222	0.03778	0	0	0	0
1138	SSL2.50CH01_89984731	SL2.50CH01	89984731	0.324	C	T	0.79648	0.20352	0	0	0	0
1139	SSL2.50CH01_90041559	SL2.50CH01	90041559	0.082	A	T	0.95729	0.04271	0	0	0	0
1140	SSL2.50CH01_90041621	SL2.50CH01	90041621	0.084	T	C	0.95603	0.04397	0	0	0	0
1141	SSL2.50CH01_90199749	SL2.50CH01	90199749	0.013	C	T	0.99367	0.00633	0	0	0	0
1142	SSL2.50CH01_90225397	SL2.50CH01	90225397	0.152	A	G	0.91688	0.08312	0	0	0	0
1143	SSL2.50CH01_90225482	SL2.50CH01	90225482	0.005	C	T	0.99748	0.00252	0	0	0	0
1144	SSL2.50CH01_90281358	SL2.50CH01	90281358	0.168	T	C	0.90727	0.09273	0	0	0	0
1145	SSL2.50CH01_90281395	SL2.50CH01	90281395	0.002	T	C	0.99875	0.00125	0	0	0	0
1146	SSL2.50CH01_90328036	SL2.50CH01	90328036	0.176	A	T	0.90278	0.09722	0	0	0	0
1147	SSL2.50CH01_90343261	SL2.50CH01	90343261	0.037	C	T	0.98111	0.01889	0	0	0	0
1148	SSL2.50CH01_90366645	SL2.50CH01	90366645	0.15	T	C	0.91855	0.08145	0	0	0	0
1149	SSL2.50CH01_90428527	SL2.50CH01	90428527	0.068	G	C	0.96465	0.03409	0.00126	0	0	0
1150	SSL2.50CH01_90444493	SL2.50CH01	90444493	0.185	A	G	0.89698	0.10302	0	0	0	0
1151	SSL2.50CH01_90444523	SL2.50CH01	90444523	0.1	T	A	0.94724	0.05276	0	0	0	0
1152	SSL2.50CH01_90460394	SL2.50CH01	90460394	0.177	T	A	0.90201	0.09799	0	0	0	0
1153	SSL2.50CH01_90460417	SL2.50CH01	90460417	0.167	T	G	0.90829	0.09171	0	0	0	0
1154	SSL2.50CH01_90475629	SL2.50CH01	90475629	0.166	A	G	0.90852	0.09148	0	0	0	0
1155	SSL2.50CH01_90475650	SL2.50CH01	90475650	0.072	C	T	0.96241	0.03759	0	0	0	0
1156	SSL2.50CH01_90490993	SL2.50CH01	90490993	0.245	A	C	0.85696	0.14304	0	0	0	0
1157	SSL2.50CH01_90709122	SL2.50CH01	90709122	0.073	T	G	0.96222	0.03778	0	0	0	0
1158	SSL2.50CH01_90724275	SL2.50CH01	90724275	0.066	T	C	0.96591	0.03409	0	0	0	0
1159	SSL2.50CH01_90724282	SL2.50CH01	90724282	0.169	G	T	0.90657	0.09343	0	0	0	0
1160	SSL2.50CH01_90724349	SL2.50CH01	90724349	0.13	A	G	0.93038	0.06962	0	0	0	0
1161	SSL2.50CH01_90828066	SL2.50CH01	90828066	0.086	A	C	0.95477	0.04523	0	0	0	0
1162	SSL2.50CH01_90828110	SL2.50CH01	90828110	0.073	T	C	0.96231	0.03769	0	0	0	0
1163	SSL2.50CH01_90828112	SL2.50CH01	90828112	0.073	A	G	0.96231	0.03769	0	0	0	0
1164	SSL2.50CH01_90828122	SL2.50CH01	90828122	0.033	T	C	0.98313	0.01687	0	0	0	0
1165	SSL2.50CH01_90828144	SL2.50CH01	90828144	0.009	A	G	0.99571	0.00429	0	0	0	0
1166	SSL2.50CH01_90987755	SL2.50CH01	90987755	0.12	A	T	0.93577	0.06423	0	0	0	0
1167	SSL2.50CH01_90987764	SL2.50CH01	90987764	0.049	A	T	0.97481	0.02519	0	0	0	0
1168	SSL2.50CH01_90987771	SL2.50CH01	90987771	0.02	C	T	0.98992	0.01008	0	0	0	0
1169	SSL2.50CH01_91091264	SL2.50CH01	91091264	0.018	A	G	0.991	0.009	0	0	0	0
1170	SSL2.50CH01_91091287	SL2.50CH01	91091287	0.059	A	C	0.96985	0.0201	0.01005	0	0	0
1171	SSL2.50CH01_91124098	SL2.50CH01	91124098	0.177	A	G	0.90201	0.09799	0	0	0	0
1172	SSL2.50CH01_91124134	SL2.50CH01	91124134	0.175	G	A	0.90327	0.09673	0	0	0	0
1173	SSL2.50CH01_91256237	SL2.50CH01	91256237	0.166	T	C	0.90863	0.09137	0	0	0	0
1174	SSL2.50CH01_91256266	SL2.50CH01	91256266	0.02	A	G	0.9898	0.0102	0	0	0	0
1175	SSL2.50CH01_91256279	SL2.50CH01	91256279	0.015	G	T	0.99241	0.00759	0	0	0	0
1176	SSL2.50CH01_91271723	SL2.50CH01	91271723	0.051	A	G	0.97362	0.02638	0	0	0	0
1177	SSL2.50CH01_91336593	SL2.50CH01	91336593	0.296	T	C	0.81944	0.18056	0	0	0	0
1178	SSL2.50CH01_91336654	SL2.50CH01	91336654	0.138	A	G	0.92532	0.07468	0	0	0	0
1179	SSL2.50CH01_91336670	SL2.50CH01	91336670	0.023	G	T	0.98858	0.01142	0	0	0	0
1180	SSL2.50CH01_91369657	SL2.50CH01	91369657	0.186	C	A	0.89646	0.10354	0	0	0	0
1181	SSL2.50CH01_91369688	SL2.50CH01	91369688	0.121	C	T	0.93544	0.06456	0	0	0	0
1182	SSL2.50CH01_91369691	SL2.50CH01	91369691	0.121	A	C	0.93544	0.06456	0	0	0	0
1183	SSL2.50CH01_91369704	SL2.50CH01	91369704	0.121	C	T	0.93544	0.06456	0	0	0	0
1184	SSL2.50CH01_91369708	SL2.50CH01	91369708	0.068	T	C	0.96466	0.03534	0	0	0	0
1185	SSL2.50CH01_91369709	SL2.50CH01	91369709	0.059	A	C	0.96962	0.03038	0	0	0	0
1186	SSL2.50CH01_91369715	SL2.50CH01	91369715	0.104	T	A	0.94487	0.05513	0	0	0	0
1187	SSL2.50CH01_91369718	SL2.50CH01	91369718	0.121	G	T	0.93544	0.06329	0.00127	0	0	0
1188	SSL2.50CH01_91369732	SL2.50CH01	91369732	0.125	T	A	0.93418	0.0443	0.02152	0	0	0
1189	SSL2.50CH01_91369734	SL2.50CH01	91369734	0.094	A	C	0.95063	0.04937	0	0	0	0
1190	SSL2.50CH01_91639832	SL2.50CH01	91639832	0.059	C	T	0.9697	0.0303	0	0	0	0
1191	SSL2.50CH01_91639842	SL2.50CH01	91639842	0.107	G	A	0.94318	0.05682	0	0	0	0
1192	SSL2.50CH01_91639919	SL2.50CH01	91639919	0.02	A	T	0.98987	0.01013	0	0	0	0
1193	SSL2.50CH01_91639920	SL2.50CH01	91639920	0.025	A	G	0.98734	0.01013	0.00253	0	0	0
1194	SSL2.50CH01_91639922	SL2.50CH01	91639922	0.028	T	A	0.98604	0.01396	0	0	0	0
1195	SSL2.50CH01_91656528	SL2.50CH01	91656528	0.02	G	A	0.9899	0.0101	0	0	0	0
1196	SSL2.50CH01_91656560	SL2.50CH01	91656560	0.013	G	A	0.99369	0.00631	0	0	0	0
1197	SSL2.50CH01_91672901	SL2.50CH01	91672901	0.175	T	C	0.90302	0.09698	0	0	0	0
1198	SSL2.50CH01_91689429	SL2.50CH01	91689429	0.183	G	A	0.89824	0.10176	0	0	0	0
1199	SSL2.50CH01_91689438	SL2.50CH01	91689438	0.003	G	A	0.99874	0.00126	0	0	0	0
1200	SSL2.50CH01_91689463	SL2.50CH01	91689463	0.079	C	T	0.95854	0.04146	0	0	0	0
1201	SSL2.50CH01_91712707	SL2.50CH01	91712707	0.146	C	T	0.92045	0.07955	0	0	0	0
1202	SSL2.50CH01_91712718	SL2.50CH01	91712718	0.017	A	G	0.99118	0.00882	0	0	0	0
1203	SSL2.50CH01_91712722	SL2.50CH01	91712722	0.037	T	A	0.98106	0.01894	0	0	0	0
1204	SSL2.50CH01_91712758	SL2.50CH01	91712758	0.045	T	C	0.97722	0.02278	0	0	0	0
1205	SSL2.50CH01_91712766	SL2.50CH01	91712766	0.052	C	A	0.97342	0.02658	0	0	0	0
1206	SSL2.50CH01_91751702	SL2.50CH01	91751702	0.176	C	T	0.90226	0.09774	0	0	0	0
1207	SSL2.50CH01_91784075	SL2.50CH01	91784075	0.166	A	C	0.90852	0.09148	0	0	0	0
1208	SSL2.50CH01_91816773	SL2.50CH01	91816773	0.017	T	C	0.99121	0.00879	0	0	0	0
1209	SSL2.50CH01_91816804	SL2.50CH01	91816804	0.114	C	T	0.93955	0.06045	0	0	0	0
1210	SSL2.50CH01_91816807	SL2.50CH01	91816807	0.059	C	G	0.96977	0.03023	0	0	0	0
1211	SSL2.50CH01_91816816	SL2.50CH01	91816816	0.052	A	T	0.97348	0.02652	0	0	0	0
1212	SSL2.50CH01_91866229	SL2.50CH01	91866229	0.094	A	G	0.95063	0.04937	0	0	0	0
1213	SSL2.50CH01_91866235	SL2.50CH01	91866235	0.02	C	T	0.9899	0.0101	0	0	0	0
1214	SSL2.50CH01_91866236	SL2.50CH01	91866236	0.092	A	G	0.9519	0.0481	0	0	0	0
1215	SSL2.50CH01_91881282	SL2.50CH01	91881282	0.171	T	C	0.90554	0.09446	0	0	0	0
1216	SSL2.50CH01_92005559	SL2.50CH01	92005559	0.045	T	G	0.97704	0.02296	0	0	0	0
1217	SSL2.50CH01_92005561	SL2.50CH01	92005561	0.045	C	G	0.97704	0.02168	0.00128	0	0	0
1218	SSL2.50CH01_92005578	SL2.50CH01	92005578	0.139	T	C	0.92494	0.07506	0	0	0	0
1219	SSL2.50CH01_92068496	SL2.50CH01	92068496	0.11	C	A	0.94236	0.03759	0.02005	0	0	0
1220	SSL2.50CH01_92068497	SL2.50CH01	92068497	0.086	G	A	0.95489	0.04511	0	0	0	0
1221	SSL2.50CH01_92068573	SL2.50CH01	92068573	0.061	T	A	0.96867	0.03133	0	0	0	0
1222	SSL2.50CH01_92087698	SL2.50CH01	92087698	0.12	C	T	0.93577	0.06423	0	0	0	0
1223	SSL2.50CH01_92087718	SL2.50CH01	92087718	0.073	G	C	0.96222	0.03778	0	0	0	0
1224	SSL2.50CH01_92087733	SL2.50CH01	92087733	0.175	C	T	0.90302	0.09698	0	0	0	0
1225	SSL2.50CH01_92087774	SL2.50CH01	92087774	0.084	G	T	0.95592	0.04408	0	0	0	0
1226	SSL2.50CH01_92137094	SL2.50CH01	92137094	0.006	C	A	0.9969	0.0031	0	0	0	0
1227	SSL2.50CH01_92137113	SL2.50CH01	92137113	0.1	A	G	0.9471	0.0529	0	0	0	0
1228	SSL2.50CH01_92153051	SL2.50CH01	92153051	0.123	G	T	0.93418	0.06582	0	0	0	0
1229	SSL2.50CH01_92153103	SL2.50CH01	92153103	0.015	G	A	0.99239	0.00761	0	0	0	0
1230	SSL2.50CH01_92198479	SL2.50CH01	92198479	0.066	C	G	0.96591	0.03409	0	0	0	0
1231	SSL2.50CH01_92198526	SL2.50CH01	92198526	0.049	C	G	0.97475	0.02525	0	0	0	0
1232	SSL2.50CH01_92215718	SL2.50CH01	92215718	0.136	G	T	0.92674	0.07326	0	0	0	0
1233	SSL2.50CH01_92215808	SL2.50CH01	92215808	0.013	T	C	0.99357	0.00643	0	0	0	0
1234	SSL2.50CH01_92231358	SL2.50CH01	92231358	0.171	T	C	0.90578	0.09422	0	0	0	0
1235	SSL2.50CH01_92231412	SL2.50CH01	92231412	0.035	A	G	0.98241	0.01759	0	0	0	0
1236	SSL2.50CH01_92231421	SL2.50CH01	92231421	0.171	A	T	0.90578	0.09422	0	0	0	0
1237	SSL2.50CH01_92246549	SL2.50CH01	92246549	0.146	G	T	0.92085	0.07789	0.00126	0	0	0
1238	SSL2.50CH01_92263298	SL2.50CH01	92263298	0.005	C	G	0.99746	0.00254	0	0	0	0
1239	SSL2.50CH01_92263310	SL2.50CH01	92263310	0.116	G	T	0.93814	0.06186	0	0	0	0
1240	SSL2.50CH01_92391217	SL2.50CH01	92391217	0.056	G	A	0.97111	0.02889	0	0	0	0
1241	SSL2.50CH01_92391234	SL2.50CH01	92391234	0.054	C	T	0.97236	0.02764	0	0	0	0
1242	SSL2.50CH01_92423803	SL2.50CH01	92423803	0.169	C	T	0.9068	0.0932	0	0	0	0
1243	SSL2.50CH01_92443407	SL2.50CH01	92443407	0.15	G	C	0.91814	0.08186	0	0	0	0
1244	SSL2.50CH01_92475711	SL2.50CH01	92475711	0.105	C	T	0.94458	0.05542	0	0	0	0
1245	SSL2.50CH01_92475721	SL2.50CH01	92475721	0.082	T	G	0.95718	0.04282	0	0	0	0
1246	SSL2.50CH01_92475788	SL2.50CH01	92475788	0.073	C	G	0.96203	0.03797	0	0	0	0
1247	SSL2.50CH01_92475798	SL2.50CH01	92475798	0.047	G	C	0.97607	0.02393	0	0	0	0
1248	SSL2.50CH01_92507842	SL2.50CH01	92507842	0.1	A	T	0.94724	0.05276	0	0	0	0
1249	SSL2.50CH01_92507869	SL2.50CH01	92507869	0.054	C	T	0.97236	0.02764	0	0	0	0
1250	SSL2.50CH01_92507932	SL2.50CH01	92507932	0.049	A	G	0.97481	0.02519	0	0	0	0
1251	SSL2.50CH01_92541254	SL2.50CH01	92541254	0.054	G	A	0.97236	0.02764	0	0	0	0
1252	SSL2.50CH01_92541256	SL2.50CH01	92541256	0.053	A	C	0.9725	0.0275	0	0	0	0
1253	SSL2.50CH01_92541268	SL2.50CH01	92541268	0.188	T	C	0.89474	0.10526	0	0	0	0
1254	SSL2.50CH01_92556683	SL2.50CH01	92556683	0.003	C	T	0.99874	0.00126	0	0	0	0
1255	SSL2.50CH01_92556701	SL2.50CH01	92556701	0.181	T	C	0.89924	0.10076	0	0	0	0
1256	SSL2.50CH01_92686689	SL2.50CH01	92686689	0.096	T	C	0.94949	0.05051	0	0	0	0
1257	SSL2.50CH01_92686715	SL2.50CH01	92686715	0.098	A	T	0.94832	0.05168	0	0	0	0
1258	SSL2.50CH01_92686734	SL2.50CH01	92686734	0.008	T	A	0.99599	0.00401	0	0	0	0
1259	SSL2.50CH01_92733240	SL2.50CH01	92733240	0.124	C	G	0.93384	0.06616	0	0	0	0
1260	SSL2.50CH01_92733254	SL2.50CH01	92733254	0.02	T	G	0.98982	0.01018	0	0	0	0
1261	SSL2.50CH01_92733305	SL2.50CH01	92733305	0.057	A	T	0.97074	0.02926	0	0	0	0
1262	SSL2.50CH01_92780530	SL2.50CH01	92780530	0.116	C	T	0.93844	0.06156	0	0	0	0
1263	SSL2.50CH01_92780563	SL2.50CH01	92780563	0.039	T	A	0.9799	0.0201	0	0	0	0
1264	SSL2.50CH01_92973822	SL2.50CH01	92973822	0.027	G	A	0.98615	0.01385	0	0	0	0
1265	SSL2.50CH01_92973824	SL2.50CH01	92973824	0.056	G	A	0.97111	0.02889	0	0	0	0
1266	SSL2.50CH01_92973876	SL2.50CH01	92973876	0.022	A	G	0.98869	0.01131	0	0	0	0
1267	SSL2.50CH01_93049898	SL2.50CH01	93049898	0.071	T	G	0.96338	0.03662	0	0	0	0
1268	SSL2.50CH01_93116692	SL2.50CH01	93116692	0.039	T	A	0.97985	0.02015	0	0	0	0
1269	SSL2.50CH01_93116708	SL2.50CH01	93116708	0.044	T	A	0.97733	0.02267	0	0	0	0
1270	SSL2.50CH01_93116737	SL2.50CH01	93116737	0.112	C	G	0.94081	0.05793	0.00126	0	0	0
1271	SSL2.50CH01_93116743	SL2.50CH01	93116743	0.054	G	A	0.97229	0.02771	0	0	0	0
1272	SSL2.50CH01_93116753	SL2.50CH01	93116753	0.059	G	A	0.96977	0.03023	0	0	0	0
1273	SSL2.50CH01_93131711	SL2.50CH01	93131711	0.086	A	G	0.95477	0.04523	0	0	0	0
1274	SSL2.50CH01_93131732	SL2.50CH01	93131732	0.173	C	A	0.90452	0.09548	0	0	0	0
1275	SSL2.50CH01_93148094	SL2.50CH01	93148094	0.126	C	T	0.93233	0.06767	0	0	0	0
1276	SSL2.50CH01_93148118	SL2.50CH01	93148118	0.046	C	A	0.97619	0.02381	0	0	0	0
1277	SSL2.50CH01_93148160	SL2.50CH01	93148160	0.136	A	C	0.9268	0.0732	0	0	0	0
1278	SSL2.50CH01_93179320	SL2.50CH01	93179320	0.152	T	A	0.91709	0.08291	0	0	0	0
1279	SSL2.50CH01_93194332	SL2.50CH01	93194332	0.178	G	A	0.901	0.099	0	0	0	0
1280	SSL2.50CH01_93194389	SL2.50CH01	93194389	0.05	C	A	0.97449	0.02551	0	0	0	0
1281	SSL2.50CH01_93210041	SL2.50CH01	93210041	0.097	A	G	0.94862	0.05138	0	0	0	0
1282	SSL2.50CH01_93243975	SL2.50CH01	93243975	0.056	T	C	0.97103	0.02897	0	0	0	0
1283	SSL2.50CH01_93243996	SL2.50CH01	93243996	0.125	C	T	0.93325	0.06675	0	0	0	0
1284	SSL2.50CH01_93244043	SL2.50CH01	93244043	0.08	G	A	0.95833	0.04167	0	0	0	0
1285	SSL2.50CH01_93244057	SL2.50CH01	93244057	0.056	A	T	0.97103	0.02897	0	0	0	0
1286	SSL2.50CH01_93424539	SL2.50CH01	93424539	0.177	A	G	0.90176	0.09824	0	0	0	0
1287	SSL2.50CH01_93424546	SL2.50CH01	93424546	0.015	A	G	0.99244	0.00756	0	0	0	0
1288	SSL2.50CH01_93440998	SL2.50CH01	93440998	0.064	C	T	0.96692	0.03308	0	0	0	0
1289	SSL2.50CH01_93441022	SL2.50CH01	93441022	0.042	C	T	0.97848	0.02152	0	0	0	0
1290	SSL2.50CH01_93441072	SL2.50CH01	93441072	0.045	T	C	0.97722	0.02278	0	0	0	0
1291	SSL2.50CH01_93472460	SL2.50CH01	93472460	0.179	T	G	0.90075	0.09925	0	0	0	0
1292	SSL2.50CH01_93472488	SL2.50CH01	93472488	0.025	G	C	0.98744	0.01256	0	0	0	0
1293	SSL2.50CH01_93472534	SL2.50CH01	93472534	0.08	T	G	0.95833	0.04167	0	0	0	0
1294	SSL2.50CH01_93508939	SL2.50CH01	93508939	0.113	A	T	0.94066	0.04167	0.01768	0	0	0
1295	SSL2.50CH01_93527108	SL2.50CH01	93527108	0.025	A	G	0.98747	0.01253	0	0	0	0
1296	SSL2.50CH01_93527112	SL2.50CH01	93527112	0.172	C	T	0.90476	0.09524	0	0	0	0
1297	SSL2.50CH01_93573396	SL2.50CH01	93573396	0.123	C	T	0.93445	0.05913	0.00643	0	0	0
1298	SSL2.50CH01_93573435	SL2.50CH01	93573435	0.091	C	A	0.95244	0.04756	0	0	0	0
1299	SSL2.50CH01_93607046	SL2.50CH01	93607046	0.039	G	A	0.9799	0.0201	0	0	0	0
1300	SSL2.50CH01_93628128	SL2.50CH01	93628128	0.059	A	G	0.96977	0.03023	0	0	0	0
1301	SSL2.50CH01_93628167	SL2.50CH01	93628167	0.095	T	G	0.94975	0.05025	0	0	0	0
1302	SSL2.50CH01_93658530	SL2.50CH01	93658530	0.054	C	G	0.97236	0.02513	0.00251	0	0	0
1303	SSL2.50CH01_93658542	SL2.50CH01	93658542	0.02	G	T	0.98995	0.01005	0	0	0	0
1304	SSL2.50CH01_93658558	SL2.50CH01	93658558	0.061	T	G	0.96859	0.03141	0	0	0	0
1305	SSL2.50CH01_93713210	SL2.50CH01	93713210	0.032	A	T	0.98371	0.01629	0	0	0	0
1306	SSL2.50CH01_93713211	SL2.50CH01	93713211	0.03	A	G	0.98496	0.01504	0	0	0	0
1307	SSL2.50CH01_93713213	SL2.50CH01	93713213	0.061	G	A	0.96867	0.03133	0	0	0	0
1308	SSL2.50CH01_93713225	SL2.50CH01	93713225	0.036	C	A	0.98165	0.01835	0	0	0	0
1309	SSL2.50CH01_93713268	SL2.50CH01	93713268	0.135	G	A	0.92732	0.07268	0	0	0	0
1310	SSL2.50CH01_93713279	SL2.50CH01	93713279	0.032	T	A	0.98371	0.01629	0	0	0	0
1311	SSL2.50CH01_93767566	SL2.50CH01	93767566	0.177	G	A	0.90201	0.09799	0	0	0	0
1312	SSL2.50CH01_93788692	SL2.50CH01	93788692	0.032	C	G	0.98367	0.01633	0	0	0	0
1313	SSL2.50CH01_93788739	SL2.50CH01	93788739	0.084	A	G	0.95603	0.04397	0	0	0	0
1314	SSL2.50CH01_93819335	SL2.50CH01	93819335	0.126	T	C	0.93233	0.06767	0	0	0	0
1315	SSL2.50CH01_93819369	SL2.50CH01	93819369	0.068	C	T	0.96491	0.03509	0	0	0	0
1316	SSL2.50CH01_93819371	SL2.50CH01	93819371	0.02	C	T	0.98997	0.01003	0	0	0	0
1317	SSL2.50CH01_93819397	SL2.50CH01	93819397	0.045	T	A	0.97721	0.02279	0	0	0	0
1318	SSL2.50CH01_93891040	SL2.50CH01	93891040	0.497	A	C	0.53769	0.46231	0	0	0	0
1319	SSL2.50CH01_93891055	SL2.50CH01	93891055	0.064	A	G	0.96667	0.03333	0	0	0	0
1320	SSL2.50CH01_93912704	SL2.50CH01	93912704	0.044	G	A	0.97739	0.0201	0.00251	0	0	0
1321	SSL2.50CH01_93912723	SL2.50CH01	93912723	0.095	A	G	0.94975	0.05025	0	0	0	0
1322	SSL2.50CH01_93983755	SL2.50CH01	93983755	0.433	A	G	0.68262	0.31738	0	0	0	0
1323	SSL2.50CH01_93983796	SL2.50CH01	93983796	0.059	T	C	0.96977	0.03023	0	0	0	0
1324	SSL2.50CH01_94016234	SL2.50CH01	94016234	0.015	T	C	0.99246	0.00754	0	0	0	0
1325	SSL2.50CH01_94016277	SL2.50CH01	94016277	0.003	C	G	0.99846	0.00154	0	0	0	0
1326	SSL2.50CH01_94095533	SL2.50CH01	94095533	0.121	C	A	0.93561	0.06187	0.00253	0	0	0
1327	SSL2.50CH01_94114596	SL2.50CH01	94114596	0.008	T	A	0.99617	0.00383	0	0	0	0
1328	SSL2.50CH01_94114642	SL2.50CH01	94114642	0.025	T	C	0.98741	0.01259	0	0	0	0
1329	SSL2.50CH01_94114665	SL2.50CH01	94114665	0.042	C	T	0.97859	0.02141	0	0	0	0
1330	SSL2.50CH01_94114666	SL2.50CH01	94114666	0.042	C	G	0.97859	0.02141	0	0	0	0
1331	SSL2.50CH01_94245430	SL2.50CH01	94245430	0.084	T	C	0.95592	0.04408	0	0	0	0
1332	SSL2.50CH01_94279255	SL2.50CH01	94279255	0.042	G	A	0.97844	0.02156	0	0	0	0
1333	SSL2.50CH01_94279273	SL2.50CH01	94279273	0.017	A	G	0.9914	0.0086	0	0	0	0
1334	SSL2.50CH01_94358639	SL2.50CH01	94358639	0.125	C	T	0.93308	0.06692	0	0	0	0
1335	SSL2.50CH01_94358640	SL2.50CH01	94358640	0.003	T	C	0.99874	0.00126	0	0	0	0
1336	SSL2.50CH01_94459241	SL2.50CH01	94459241	0.116	A	G	0.93844	0.06156	0	0	0	0
1337	SSL2.50CH01_94459300	SL2.50CH01	94459300	0.181	G	A	0.8995	0.1005	0	0	0	0
1338	SSL2.50CH01_94479021	SL2.50CH01	94479021	0.177	A	G	0.90176	0.09824	0	0	0	0
1339	SSL2.50CH01_94479024	SL2.50CH01	94479024	0.059	G	A	0.96977	0.03023	0	0	0	0
1340	SSL2.50CH01_94479096	SL2.50CH01	94479096	0.01	C	G	0.99496	0.00504	0	0	0	0
1341	SSL2.50CH01_94494300	SL2.50CH01	94494300	0.126	G	C	0.93257	0.06743	0	0	0	0
1342	SSL2.50CH01_94514063	SL2.50CH01	94514063	0.123	G	A	0.93401	0.06599	0	0	0	0
1343	SSL2.50CH01_94529261	SL2.50CH01	94529261	0.086	C	G	0.95489	0.04135	0.00376	0	0	0
1344	SSL2.50CH01_94529278	SL2.50CH01	94529278	0.124	A	T	0.93358	0.06642	0	0	0	0
1345	SSL2.50CH01_94547627	SL2.50CH01	94547627	0.005	C	G	0.99749	0.00251	0	0	0	0
1346	SSL2.50CH01_94547640	SL2.50CH01	94547640	0.039	G	A	0.97995	0.02005	0	0	0	0
1347	SSL2.50CH01_94547690	SL2.50CH01	94547690	0.088	C	T	0.95363	0.04637	0	0	0	0
1348	SSL2.50CH01_94562687	SL2.50CH01	94562687	0.174	C	T	0.90351	0.09649	0	0	0	0
1349	SSL2.50CH01_94562730	SL2.50CH01	94562730	0.061	T	C	0.96867	0.03133	0	0	0	0
1350	SSL2.50CH01_94562756	SL2.50CH01	94562756	0.176	A	G	0.90226	0.09774	0	0	0	0
1351	SSL2.50CH01_94592867	SL2.50CH01	94592867	0.116	T	A	0.93844	0.06156	0	0	0	0
1352	SSL2.50CH01_94592870	SL2.50CH01	94592870	0.047	G	A	0.97613	0.02387	0	0	0	0
1353	SSL2.50CH01_94673006	SL2.50CH01	94673006	0.491	G	A	0.56692	0.43308	0	0	0	0
1354	SSL2.50CH01_94673023	SL2.50CH01	94673023	0.039	T	C	0.97995	0.02005	0	0	0	0
1355	SSL2.50CH01_94673083	SL2.50CH01	94673083	0.047	C	T	0.97607	0.02393	0	0	0	0
1356	SSL2.50CH01_94722622	SL2.50CH01	94722622	0.476	T	C	0.61028	0.38972	0	0	0	0
1357	SSL2.50CH01_94722630	SL2.50CH01	94722630	0.042	T	G	0.97864	0.02136	0	0	0	0
1358	SSL2.50CH01_94722681	SL2.50CH01	94722681	0.023	G	A	0.9886	0.0114	0	0	0	0
1359	SSL2.50CH01_94722710	SL2.50CH01	94722710	0.052	C	T	0.97355	0.02645	0	0	0	0
1360	SSL2.50CH01_94722712	SL2.50CH01	94722712	0.025	A	G	0.98747	0.01253	0	0	0	0
1361	SSL2.50CH01_94762824	SL2.50CH01	94762824	0.15	A	T	0.91834	0.08166	0	0	0	0
1362	SSL2.50CH01_94806314	SL2.50CH01	94806314	0.06	C	T	0.96883	0.03117	0	0	0	0
1363	SSL2.50CH01_94852088	SL2.50CH01	94852088	0.012	C	T	0.99372	0.00628	0	0	0	0
1364	SSL2.50CH01_94890013	SL2.50CH01	94890013	0.162	T	G	0.9108	0.0892	0	0	0	0
1365	SSL2.50CH01_94890085	SL2.50CH01	94890085	0.155	C	T	0.9154	0.0846	0	0	0	0
1366	SSL2.50CH01_94929908	SL2.50CH01	94929908	0.08	A	T	0.95844	0.04156	0	0	0	0
1367	SSL2.50CH01_94929923	SL2.50CH01	94929923	0.157	G	A	0.91436	0.08564	0	0	0	0
1368	SSL2.50CH01_94929968	SL2.50CH01	94929968	0.077	G	A	0.9597	0.0403	0	0	0	0
1369	SSL2.50CH01_94949234	SL2.50CH01	94949234	0.068	T	G	0.96482	0.03518	0	0	0	0
1370	SSL2.50CH01_94984973	SL2.50CH01	94984973	0.167	G	C	0.90829	0.09171	0	0	0	0
1371	SSL2.50CH01_95024594	SL2.50CH01	95024594	0.133	G	A	0.92821	0.07179	0	0	0	0
1372	SSL2.50CH01_95024608	SL2.50CH01	95024608	0.066	G	A	0.96599	0.03401	0	0	0	0
1373	SSL2.50CH01_95024617	SL2.50CH01	95024617	0.12	C	T	0.93561	0.06439	0	0	0	0
1374	SSL2.50CH01_95024638	SL2.50CH01	95024638	0.131	A	G	0.92929	0.07071	0	0	0	0
1375	SSL2.50CH01_95127616	SL2.50CH01	95127616	0.145	C	T	0.92139	0.07861	0	0	0	0
1376	SSL2.50CH01_95127633	SL2.50CH01	95127633	0.015	C	T	0.99229	0.00771	0	0	0	0
1377	SSL2.50CH01_95261222	SL2.50CH01	95261222	0.162	C	T	0.91103	0.08897	0	0	0	0
1378	SSL2.50CH01_95261282	SL2.50CH01	95261282	0.084	G	T	0.95614	0.04386	0	0	0	0
1379	SSL2.50CH01_95311740	SL2.50CH01	95311740	0.169	A	G	0.90704	0.09296	0	0	0	0
1380	SSL2.50CH01_95311832	SL2.50CH01	95311832	0.07	C	G	0.96357	0.03643	0	0	0	0
1381	SSL2.50CH01_95311833	SL2.50CH01	95311833	0.07	G	A	0.96357	0.03643	0	0	0	0
1382	SSL2.50CH01_95432171	SL2.50CH01	95432171	0.134	A	G	0.92766	0.07234	0	0	0	0
1383	SSL2.50CH01_95432200	SL2.50CH01	95432200	0.04	G	A	0.9797	0.0203	0	0	0	0
1384	SSL2.50CH01_95450560	SL2.50CH01	95450560	0.051	G	A	0.97362	0.02638	0	0	0	0
1385	SSL2.50CH01_95501602	SL2.50CH01	95501602	0.071	A	G	0.96316	0.03684	0	0	0	0
1386	SSL2.50CH01_95517829	SL2.50CH01	95517829	0.281	G	A	0.83079	0.16921	0	0	0	0
1387	SSL2.50CH01_95551710	SL2.50CH01	95551710	0.126	G	A	0.93216	0.06784	0	0	0	0
1388	SSL2.50CH01_95551716	SL2.50CH01	95551716	0.051	A	G	0.97362	0.02638	0	0	0	0
1389	SSL2.50CH01_95586739	SL2.50CH01	95586739	0.091	G	A	0.95238	0.04762	0	0	0	0
1390	SSL2.50CH01_95586749	SL2.50CH01	95586749	0.061	G	A	0.96867	0.03133	0	0	0	0
1391	SSL2.50CH01_95586754	SL2.50CH01	95586754	0.049	T	C	0.97494	0.02506	0	0	0	0
1392	SSL2.50CH01_95586761	SL2.50CH01	95586761	0.054	C	A	0.97243	0.02757	0	0	0	0
1393	SSL2.50CH01_95586817	SL2.50CH01	95586817	0.054	T	C	0.97243	0.02757	0	0	0	0
1394	SSL2.50CH01_95586822	SL2.50CH01	95586822	0.084	T	A	0.95603	0.04397	0	0	0	0
1395	SSL2.50CH01_95607745	SL2.50CH01	95607745	0.089	C	A	0.95352	0.04648	0	0	0	0
1396	SSL2.50CH01_95644968	SL2.50CH01	95644968	0.142	T	C	0.92337	0.07663	0	0	0	0
1397	SSL2.50CH01_95736526	SL2.50CH01	95736526	0.01	T	C	0.99495	0.00505	0	0	0	0
1398	SSL2.50CH01_95794489	SL2.50CH01	95794489	0.131	G	A	0.92965	0.07035	0	0	0	0
1399	SSL2.50CH01_95794530	SL2.50CH01	95794530	0.091	T	A	0.95238	0.04762	0	0	0	0
1400	SSL2.50CH01_95794540	SL2.50CH01	95794540	0.034	G	A	0.98246	0.01754	0	0	0	0
1401	SSL2.50CH01_95794574	SL2.50CH01	95794574	0.093	C	G	0.95113	0.04887	0	0	0	0
1402	SSL2.50CH01_95809499	SL2.50CH01	95809499	0.039	C	T	0.9799	0.0201	0	0	0	0
1403	SSL2.50CH01_95809545	SL2.50CH01	95809545	0.163	T	C	0.91071	0.08929	0	0	0	0
1404	SSL2.50CH01_95809567	SL2.50CH01	95809567	0.02	A	G	0.98974	0.01026	0	0	0	0
1405	SSL2.50CH01_95826586	SL2.50CH01	95826586	0.214	A	T	0.87845	0.12155	0	0	0	0
1406	SSL2.50CH01_95861163	SL2.50CH01	95861163	0.159	G	C	0.9131	0.0869	0	0	0	0
1407	SSL2.50CH01_95893119	SL2.50CH01	95893119	0.152	C	T	0.91709	0.08291	0	0	0	0
1408	SSL2.50CH01_95893197	SL2.50CH01	95893197	0.032	A	G	0.98383	0.01617	0	0	0	0
1409	SSL2.50CH01_95908639	SL2.50CH01	95908639	0.074	T	C	0.96164	0.03836	0	0	0	0
1410	SSL2.50CH01_95908717	SL2.50CH01	95908717	0.028	G	T	0.98586	0.01285	0.00129	0	0	0
1411	SSL2.50CH01_95971325	SL2.50CH01	95971325	0.077	T	C	0.9597	0.0403	0	0	0	0
1412	SSL2.50CH01_95971342	SL2.50CH01	95971342	0.02	T	C	0.98992	0.01008	0	0	0	0
1413	SSL2.50CH01_95971348	SL2.50CH01	95971348	0.025	G	A	0.98741	0.01259	0	0	0	0
1414	SSL2.50CH01_95971355	SL2.50CH01	95971355	0.028	T	A	0.98586	0.01414	0	0	0	0
1415	SSL2.50CH01_95971378	SL2.50CH01	95971378	0.167	G	T	0.90806	0.09194	0	0	0	0
1416	SSL2.50CH01_96026198	SL2.50CH01	96026198	0.199	G	C	0.88819	0.11181	0	0	0	0
1417	SSL2.50CH01_96026225	SL2.50CH01	96026225	0.079	G	C	0.95854	0.04146	0	0	0	0
1418	SSL2.50CH01_96049074	SL2.50CH01	96049074	0.097	T	C	0.94898	0.05102	0	0	0	0
1419	SSL2.50CH01_96049112	SL2.50CH01	96049112	0.139	T	G	0.92494	0.07506	0	0	0	0
1420	SSL2.50CH01_96126819	SL2.50CH01	96126819	0.12	C	A	0.93593	0.06407	0	0	0	0
1421	SSL2.50CH01_96212143	SL2.50CH01	96212143	0.173	G	C	0.90452	0.09548	0	0	0	0
1422	SSL2.50CH01_96212160	SL2.50CH01	96212160	0.012	C	T	0.99381	0.00619	0	0	0	0
1423	SSL2.50CH01_96212178	SL2.50CH01	96212178	0.049	C	G	0.97475	0.02399	0.00126	0	0	0
1424	SSL2.50CH01_96212199	SL2.50CH01	96212199	0.067	T	G	0.96556	0.03444	0	0	0	0
1425	SSL2.50CH01_96227706	SL2.50CH01	96227706	0.02	G	C	0.98995	0.01005	0	0	0	0
1426	SSL2.50CH01_96227717	SL2.50CH01	96227717	0.086	T	C	0.95477	0.04523	0	0	0	0
1427	SSL2.50CH01_96259449	SL2.50CH01	96259449	0.437	C	T	0.67714	0.32286	0	0	0	0
1428	SSL2.50CH01_96274502	SL2.50CH01	96274502	0.423	T	A	0.69598	0.30402	0	0	0	0
1429	SSL2.50CH01_96289568	SL2.50CH01	96289568	0.02	G	T	0.98995	0.01005	0	0	0	0
1430	SSL2.50CH01_96289617	SL2.50CH01	96289617	0.04	A	T	0.97943	0.02057	0	0	0	0
1431	SSL2.50CH01_96377090	SL2.50CH01	96377090	0.087	C	A	0.95466	0.04534	0	0	0	0
1432	SSL2.50CH01_96377132	SL2.50CH01	96377132	0.171	C	G	0.90554	0.09446	0	0	0	0
1433	SSL2.50CH01_96392159	SL2.50CH01	96392159	0.133	C	G	0.92839	0.07161	0	0	0	0
1434	SSL2.50CH01_96392194	SL2.50CH01	96392194	0.026	T	A	0.98667	0.01333	0	0	0	0
1435	SSL2.50CH01_96407348	SL2.50CH01	96407348	0.07	G	C	0.96366	0.03634	0	0	0	0
1436	SSL2.50CH01_96407390	SL2.50CH01	96407390	0.002	C	G	0.99875	0.00125	0	0	0	0
1437	SSL2.50CH01_96424478	SL2.50CH01	96424478	0.02	T	G	0.98995	0.01005	0	0	0	0
1438	SSL2.50CH01_96424480	SL2.50CH01	96424480	0.051	T	C	0.97362	0.02638	0	0	0	0
1439	SSL2.50CH01_96424559	SL2.50CH01	96424559	0.07	T	G	0.96348	0.03652	0	0	0	0
1440	SSL2.50CH01_96439549	SL2.50CH01	96439549	0.025	G	A	0.98741	0.01259	0	0	0	0
1441	SSL2.50CH01_96439565	SL2.50CH01	96439565	0.102	G	C	0.94584	0.05416	0	0	0	0
1442	SSL2.50CH01_96439577	SL2.50CH01	96439577	0.08	T	C	0.95844	0.04156	0	0	0	0
1443	SSL2.50CH01_96439578	SL2.50CH01	96439578	0.005	G	T	0.99748	0.00252	0	0	0	0
1444	SSL2.50CH01_96439615	SL2.50CH01	96439615	0.005	A	T	0.99748	0.00252	0	0	0	0
1445	SSL2.50CH01_96485771	SL2.50CH01	96485771	0.179	T	C	0.90075	0.09925	0	0	0	0
1446	SSL2.50CH01_96485865	SL2.50CH01	96485865	0.014	G	A	0.9928	0.0072	0	0	0	0
1447	SSL2.50CH01_96522871	SL2.50CH01	96522871	0.05	G	A	0.97455	0.02545	0	0	0	0
1448	SSL2.50CH01_96522890	SL2.50CH01	96522890	0.104	C	T	0.94501	0.05499	0	0	0	0
1449	SSL2.50CH01_96522917	SL2.50CH01	96522917	0.113	C	G	0.9399	0.0601	0	0	0	0
1450	SSL2.50CH01_96522939	SL2.50CH01	96522939	0.018	G	T	0.99103	0.00897	0	0	0	0
1451	SSL2.50CH01_96522957	SL2.50CH01	96522957	0.106	T	C	0.94359	0.05641	0	0	0	0
1452	SSL2.50CH01_96538163	SL2.50CH01	96538163	0.086	G	A	0.95477	0.04523	0	0	0	0
1453	SSL2.50CH01_96538193	SL2.50CH01	96538193	0.084	T	G	0.95603	0.04397	0	0	0	0
1454	SSL2.50CH01_96538215	SL2.50CH01	96538215	0.068	A	G	0.96482	0.03518	0	0	0	0
1455	SSL2.50CH01_96579379	SL2.50CH01	96579379	0.483	A	T	0.59171	0.40829	0	0	0	0
1456	SSL2.50CH01_96579409	SL2.50CH01	96579409	0.003	C	T	0.99866	0.00134	0	0	0	0
1457	SSL2.50CH01_96579421	SL2.50CH01	96579421	0.02	A	C	0.98995	0.01005	0	0	0	0
1458	SSL2.50CH01_96579451	SL2.50CH01	96579451	0.02	G	A	0.98997	0.01003	0	0	0	0
1459	SSL2.50CH01_96594972	SL2.50CH01	96594972	0.049	C	A	0.97487	0.02513	0	0	0	0
1460	SSL2.50CH01_96594991	SL2.50CH01	96594991	0.133	C	A	0.92839	0.07161	0	0	0	0
1461	SSL2.50CH01_96610363	SL2.50CH01	96610363	0.129	A	G	0.9309	0.0691	0	0	0	0
1462	SSL2.50CH01_96610408	SL2.50CH01	96610408	0.025	A	C	0.98741	0.01259	0	0	0	0
1463	SSL2.50CH01_96662907	SL2.50CH01	96662907	0.035	A	C	0.98228	0.01772	0	0	0	0
1464	SSL2.50CH01_96662975	SL2.50CH01	96662975	0.045	G	T	0.97716	0.02284	0	0	0	0
1465	SSL2.50CH01_96662983	SL2.50CH01	96662983	0.042	G	C	0.97843	0.02157	0	0	0	0
1466	SSL2.50CH01_96700265	SL2.50CH01	96700265	0.01	G	A	0.99496	0.00504	0	0	0	0
1467	SSL2.50CH01_96700284	SL2.50CH01	96700284	0.039	A	C	0.97985	0.02015	0	0	0	0
1468	SSL2.50CH01_96700350	SL2.50CH01	96700350	0.003	A	T	0.99846	0.00154	0	0	0	0
1469	SSL2.50CH01_96807738	SL2.50CH01	96807738	0.142	T	G	0.92308	0.07692	0	0	0	0
1470	SSL2.50CH01_96807758	SL2.50CH01	96807758	0.063	A	G	0.96742	0.03258	0	0	0	0
1471	SSL2.50CH01_96945690	SL2.50CH01	96945690	0.178	C	T	0.901	0.099	0	0	0	0
1472	SSL2.50CH01_96945760	SL2.50CH01	96945760	0.151	G	A	0.91793	0.08207	0	0	0	0
1473	SSL2.50CH01_96945782	SL2.50CH01	96945782	0.075	A	T	0.96096	0.03904	0	0	0	0
1474	SSL2.50CH01_97046255	SL2.50CH01	97046255	0.148	G	A	0.9198	0.0802	0	0	0	0
1475	SSL2.50CH01_97046280	SL2.50CH01	97046280	0.044	G	A	0.97744	0.02256	0	0	0	0
1476	SSL2.50CH01_97046288	SL2.50CH01	97046288	0.044	A	G	0.97744	0.02256	0	0	0	0
1477	SSL2.50CH01_97046332	SL2.50CH01	97046332	0.071	A	T	0.96329	0.03671	0	0	0	0
1478	SSL2.50CH01_97087955	SL2.50CH01	97087955	0.176	T	C	0.90226	0.09774	0	0	0	0
1479	SSL2.50CH01_97087989	SL2.50CH01	97087989	0.054	C	A	0.97243	0.02757	0	0	0	0
1480	SSL2.50CH01_97087996	SL2.50CH01	97087996	0.054	T	A	0.97243	0.02757	0	0	0	0
1481	SSL2.50CH01_97118860	SL2.50CH01	97118860	0.1	A	C	0.94724	0.05276	0	0	0	0
1482	SSL2.50CH01_97118905	SL2.50CH01	97118905	0.054	A	G	0.97229	0.02771	0	0	0	0
1483	SSL2.50CH01_97325815	SL2.50CH01	97325815	0.08	A	G	0.95844	0.04156	0	0	0	0
1484	SSL2.50CH01_97325841	SL2.50CH01	97325841	0.138	A	C	0.92532	0.07468	0	0	0	0
1485	SSL2.50CH01_97402412	SL2.50CH01	97402412	0.216	C	T	0.87688	0.12312	0	0	0	0
1486	SSL2.50CH01_97402423	SL2.50CH01	97402423	0.216	C	T	0.87657	0.12343	0	0	0	0
1487	SSL2.50CH01_97402424	SL2.50CH01	97402424	0.084	T	G	0.95592	0.04408	0	0	0	0
1488	SSL2.50CH01_97402457	SL2.50CH01	97402457	0.054	G	A	0.97229	0.02771	0	0	0	0
1489	SSL2.50CH01_97434915	SL2.50CH01	97434915	0.111	T	A	0.94095	0.05905	0	0	0	0
1490	SSL2.50CH01_97495506	SL2.50CH01	97495506	0.226	C	T	0.87028	0.12972	0	0	0	0
1491	SSL2.50CH01_97495521	SL2.50CH01	97495521	0.054	G	A	0.97229	0.02771	0	0	0	0
1492	SSL2.50CH01_97495533	SL2.50CH01	97495533	0.054	T	C	0.97229	0.02771	0	0	0	0
1493	SSL2.50CH01_97495553	SL2.50CH01	97495553	0.01	G	C	0.99496	0.00504	0	0	0	0
1494	SSL2.50CH01_97510513	SL2.50CH01	97510513	0.018	G	A	0.99116	0.00884	0	0	0	0
1495	SSL2.50CH01_97510521	SL2.50CH01	97510521	0.143	T	C	0.92278	0.07722	0	0	0	0
1496	SSL2.50CH01_97510583	SL2.50CH01	97510583	0.08	T	C	0.95823	0.04177	0	0	0	0
1497	SSL2.50CH01_97581278	SL2.50CH01	97581278	0.11	C	G	0.94148	0.05852	0	0	0	0
1498	SSL2.50CH01_97720753	SL2.50CH01	97720753	0.109	G	A	0.94221	0.05779	0	0	0	0
1499	SSL2.50CH01_97736135	SL2.50CH01	97736135	0.034	G	A	0.98246	0.01754	0	0	0	0
1500	SSL2.50CH01_97751166	SL2.50CH01	97751166	0.194	A	T	0.89098	0.10902	0	0	0	0
1501	SSL2.50CH01_97781590	SL2.50CH01	97781590	0.033	A	G	0.98329	0.01671	0	0	0	0
1502	SSL2.50CH01_97781609	SL2.50CH01	97781609	0.033	G	C	0.98333	0.01667	0	0	0	0
1503	SSL2.50CH01_97833191	SL2.50CH01	97833191	0.073	T	C	0.96212	0.03788	0	0	0	0
1504	SSL2.50CH01_97882915	SL2.50CH01	97882915	0.103	A	C	0.94529	0.05471	0	0	0	0
1505	SSL2.50CH01_97882938	SL2.50CH01	97882938	0.042	T	G	0.97837	0.02163	0	0	0	0
1506	SSL2.50CH01_97932426	SL2.50CH01	97932426	0.066	T	C	0.96608	0.03392	0	0	0	0
1507	SSL2.50CH01_97947729	SL2.50CH01	97947729	0.093	G	A	0.95101	0.04899	0	0	0	0
1508	SSL2.50CH01_97963777	SL2.50CH01	97963777	0.197	T	G	0.88918	0.11082	0	0	0	0
1509	SSL2.50CH01_97963793	SL2.50CH01	97963793	0.048	T	C	0.97541	0.02459	0	0	0	0
1510	SSL2.50CH01_97963816	SL2.50CH01	97963816	0.096	T	C	0.94949	0.05051	0	0	0	0
1511	SSL2.50CH01_97963841	SL2.50CH01	97963841	0.035	T	C	0.98219	0.01781	0	0	0	0
1512	SSL2.50CH01_98058972	SL2.50CH01	98058972	0.156	G	T	0.91497	0.08503	0	0	0	0
1513	SSL2.50CH01_98059035	SL2.50CH01	98059035	0.035	C	T	0.98223	0.01269	0.00508	0	0	0
1514	SSL2.50CH01_98089059	SL2.50CH01	98089059	0.093	T	G	0.95101	0.04899	0	0	0	0
1515	SSL2.50CH01_98164538	SL2.50CH01	98164538	0.084	C	T	0.95603	0.04397	0	0	0	0
1516	SSL2.50CH01_98220536	SL2.50CH01	98220536	0.417	G	A	0.70375	0.29625	0	0	0	0
1517	SSL2.50CH01_98220550	SL2.50CH01	98220550	0.363	C	T	0.76136	0.23864	0	0	0	0
1518	SSL2.50CH01_98220574	SL2.50CH01	98220574	0.418	C	T	0.70202	0.29798	0	0	0	0
1519	SSL2.50CH01_98255123	SL2.50CH01	98255123	0.094	C	G	0.95063	0.04557	0.0038	0	0	0
1520	SSL2.50CH01_98286698	SL2.50CH01	98286698	0.223	A	G	0.87218	0.12782	0	0	0	0
1521	SSL2.50CH01_98388402	SL2.50CH01	98388402	0.063	A	T	0.96734	0.03266	0	0	0	0
1522	SSL2.50CH01_98388405	SL2.50CH01	98388405	0.013	T	G	0.99367	0.00633	0	0	0	0
1523	SSL2.50CH01_98388412	SL2.50CH01	98388412	0.03	A	G	0.98481	0.01519	0	0	0	0
1524	SSL2.50CH01_98408670	SL2.50CH01	98408670	0.039	G	C	0.9799	0.0201	0	0	0	0
1525	SSL2.50CH01_98408690	SL2.50CH01	98408690	0.068	G	A	0.96482	0.03518	0	0	0	0
1526	SSL2.50CH01_98408708	SL2.50CH01	98408708	0.084	G	T	0.95603	0.04397	0	0	0	0
1527	SSL2.50CH01_98408744	SL2.50CH01	98408744	0.137	G	A	0.92621	0.07379	0	0	0	0
1528	SSL2.50CH01_98424021	SL2.50CH01	98424021	0.222	T	C	0.87312	0.12688	0	0	0	0
1529	SSL2.50CH01_98424060	SL2.50CH01	98424060	0.07	T	A	0.96357	0.03643	0	0	0	0
1530	SSL2.50CH01_98455308	SL2.50CH01	98455308	0.038	A	G	0.98092	0.01654	0.00254	0	0	0
1531	SSL2.50CH01_98455343	SL2.50CH01	98455343	0.033	C	A	0.98346	0.01654	0	0	0	0
1532	SSL2.50CH02_1125783	SL2.50CH02	1125783	0.129	A	T	0.93056	0.06944	0	0	0	0
1533	SSL2.50CH02_1125804	SL2.50CH02	1125804	0.022	C	T	0.98864	0.01136	0	0	0	0
1534	SSL2.50CH02_1238355	SL2.50CH02	1238355	0.089	A	G	0.9534	0.0466	0	0	0	0
1535	SSL2.50CH02_1238378	SL2.50CH02	1238378	0.008	T	C	0.99622	0.00378	0	0	0	0
1536	SSL2.50CH02_1238404	SL2.50CH02	1238404	0.025	G	A	0.98741	0.01259	0	0	0	0
1537	SSL2.50CH02_1238428	SL2.50CH02	1238428	0.008	C	A	0.99622	0.00378	0	0	0	0
1538	SSL2.50CH02_2536361	SL2.50CH02	2536361	0.086	C	T	0.95477	0.04523	0	0	0	0
1539	SSL2.50CH02_2536425	SL2.50CH02	2536425	0.068	T	C	0.96482	0.03518	0	0	0	0
1540	SSL2.50CH02_2553179	SL2.50CH02	2553179	0.165	C	G	0.90932	0.09068	0	0	0	0
1541	SSL2.50CH02_2568363	SL2.50CH02	2568363	0.083	A	G	0.95674	0.04326	0	0	0	0
1542	SSL2.50CH02_3229719	SL2.50CH02	3229719	0.119	A	C	0.93671	0.06329	0	0	0	0
1543	SSL2.50CH02_3272744	SL2.50CH02	3272744	0.03	C	T	0.98489	0.01511	0	0	0	0
1544	SSL2.50CH02_3732982	SL2.50CH02	3732982	0.17	C	T	0.90602	0.09398	0	0	0	0
1545	SSL2.50CH02_3732998	SL2.50CH02	3732998	0.005	T	A	0.99749	0.00251	0	0	0	0
1546	SSL2.50CH02_3733061	SL2.50CH02	3733061	0.005	G	A	0.99749	0.00251	0	0	0	0
1547	SSL2.50CH02_4070969	SL2.50CH02	4070969	0.165	A	T	0.90955	0.09045	0	0	0	0
1548	SSL2.50CH02_4070981	SL2.50CH02	4070981	0.058	C	T	0.96985	0.03015	0	0	0	0
1549	SSL2.50CH02_4071023	SL2.50CH02	4071023	0.008	T	A	0.99623	0.00377	0	0	0	0
1550	SSL2.50CH02_4337594	SL2.50CH02	4337594	0.162	C	T	0.91103	0.08897	0	0	0	0
1551	SSL2.50CH02_4486062	SL2.50CH02	4486062	0.177	G	C	0.90176	0.09824	0	0	0	0
1552	SSL2.50CH02_5077689	SL2.50CH02	5077689	0.037	T	A	0.98106	0.01894	0	0	0	0
1553	SSL2.50CH02_5077703	SL2.50CH02	5077703	0.13	C	A	0.93038	0.06962	0	0	0	0
1554	SSL2.50CH02_5077708	SL2.50CH02	5077708	0.013	A	C	0.99367	0.00633	0	0	0	0
1555	SSL2.50CH02_5077709	SL2.50CH02	5077709	0.015	A	C	0.99241	0.00759	0	0	0	0
1556	SSL2.50CH02_5077714	SL2.50CH02	5077714	0.005	G	A	0.99747	0.00253	0	0	0	0
1557	SSL2.50CH02_5077737	SL2.50CH02	5077737	0.013	G	T	0.99367	0.00633	0	0	0	0
1558	SSL2.50CH02_5077739	SL2.50CH02	5077739	0.013	A	C	0.99367	0.00633	0	0	0	0
1559	SSL2.50CH02_5077750	SL2.50CH02	5077750	0.015	A	G	0.99219	0.00781	0	0	0	0
1560	SSL2.50CH02_5187356	SL2.50CH02	5187356	0.04	C	T	0.9798	0.0202	0	0	0	0
1561	SSL2.50CH02_5187373	SL2.50CH02	5187373	0.114	T	G	0.93939	0.06061	0	0	0	0
1562	SSL2.50CH02_5187413	SL2.50CH02	5187413	0.032	C	T	0.98363	0.01637	0	0	0	0
1563	SSL2.50CH02_7331329	SL2.50CH02	7331329	0.03	A	T	0.98496	0.01504	0	0	0	0
1564	SSL2.50CH02_7494127	SL2.50CH02	7494127	0.125	A	C	0.93274	0.06726	0	0	0	0
1565	SSL2.50CH02_7494143	SL2.50CH02	7494143	0.13	C	G	0.93038	0.06962	0	0	0	0
1566	SSL2.50CH02_7494200	SL2.50CH02	7494200	0.037	T	C	0.98096	0.01904	0	0	0	0
1567	SSL2.50CH02_7494203	SL2.50CH02	7494203	0.13	A	C	0.93038	0.06962	0	0	0	0
1568	SSL2.50CH02_8039296	SL2.50CH02	8039296	0.127	T	C	0.93182	0.06818	0	0	0	0
1569	SSL2.50CH02_8039304	SL2.50CH02	8039304	0.01	C	G	0.99495	0.00505	0	0	0	0
1570	SSL2.50CH02_8039355	SL2.50CH02	8039355	0.01	T	C	0.99495	0.00505	0	0	0	0
1571	SSL2.50CH02_8054524	SL2.50CH02	8054524	0.12	A	G	0.93577	0.06423	0	0	0	0
1572	SSL2.50CH02_8330733	SL2.50CH02	8330733	0.112	T	C	0.94036	0.05838	0.00127	0	0	0
1573	SSL2.50CH02_8330803	SL2.50CH02	8330803	0.108	G	C	0.94246	0.05754	0	0	0	0
1574	SSL2.50CH02_8405765	SL2.50CH02	8405765	0.087	A	G	0.95466	0.04534	0	0	0	0
1575	SSL2.50CH02_8405788	SL2.50CH02	8405788	0.013	T	C	0.9937	0.0063	0	0	0	0
1576	SSL2.50CH02_8405841	SL2.50CH02	8405841	0.039	G	A	0.97985	0.02015	0	0	0	0
1577	SSL2.50CH02_8910997	SL2.50CH02	8910997	0.047	A	G	0.97613	0.02387	0	0	0	0
1578	SSL2.50CH02_8911005	SL2.50CH02	8911005	0.084	G	A	0.95603	0.04397	0	0	0	0
1579	SSL2.50CH02_8911007	SL2.50CH02	8911007	0.005	A	G	0.99749	0.00251	0	0	0	0
1580	SSL2.50CH02_8911008	SL2.50CH02	8911008	0.03	C	A	0.98492	0.01256	0.00251	0	0	0
1581	SSL2.50CH02_8911016	SL2.50CH02	8911016	0.075	G	A	0.96106	0.03894	0	0	0	0
1582	SSL2.50CH02_8911020	SL2.50CH02	8911020	0.075	A	T	0.96106	0.03894	0	0	0	0
1583	SSL2.50CH02_8911047	SL2.50CH02	8911047	0.049	A	G	0.97487	0.02513	0	0	0	0
1584	SSL2.50CH02_8911054	SL2.50CH02	8911054	0.075	C	T	0.96106	0.03894	0	0	0	0
1585	SSL2.50CH02_8943839	SL2.50CH02	8943839	0.135	C	G	0.92748	0.07252	0	0	0	0
1586	SSL2.50CH02_8943873	SL2.50CH02	8943873	0.015	A	G	0.99219	0.00781	0	0	0	0
1587	SSL2.50CH02_8943897	SL2.50CH02	8943897	0.042	T	C	0.97837	0.02163	0	0	0	0
1588	SSL2.50CH02_9053123	SL2.50CH02	9053123	0.171	G	A	0.90578	0.09422	0	0	0	0
1589	SSL2.50CH02_9053182	SL2.50CH02	9053182	0.091	G	A	0.95226	0.04774	0	0	0	0
1590	SSL2.50CH02_9053193	SL2.50CH02	9053193	0.006	G	A	0.99714	0.00286	0	0	0	0
1591	SSL2.50CH02_9053208	SL2.50CH02	9053208	0.005	A	C	0.99748	0.00252	0	0	0	0
1592	SSL2.50CH02_9216200	SL2.50CH02	9216200	0.056	C	T	0.97111	0.02638	0.00251	0	0	0
1593	SSL2.50CH02_9216201	SL2.50CH02	9216201	0.163	C	G	0.91058	0.08942	0	0	0	0
1594	SSL2.50CH02_9216206	SL2.50CH02	9216206	0.006	G	T	0.99714	0.00286	0	0	0	0
1595	SSL2.50CH02_9216220	SL2.50CH02	9216220	0.056	A	C	0.97103	0.02897	0	0	0	0
1596	SSL2.50CH02_9216230	SL2.50CH02	9216230	0.084	A	T	0.95592	0.04408	0	0	0	0
1597	SSL2.50CH02_13824078	SL2.50CH02	13824078	0.095	T	C	0.95	0.05	0	0	0	0
1598	SSL2.50CH02_13824113	SL2.50CH02	13824113	0.013	A	G	0.99359	0.00641	0	0	0	0
1599	SSL2.50CH02_14883597	SL2.50CH02	14883597	0.032	A	T	0.98383	0.01617	0	0	0	0
1600	SSL2.50CH02_14883600	SL2.50CH02	14883600	0.096	A	G	0.94924	0.05076	0	0	0	0
1601	SSL2.50CH02_14935771	SL2.50CH02	14935771	0.152	T	C	0.91729	0.08271	0	0	0	0
1602	SSL2.50CH02_15288322	SL2.50CH02	15288322	0.175	T	G	0.90327	0.09673	0	0	0	0
1603	SSL2.50CH02_15649431	SL2.50CH02	15649431	0.165	T	A	0.90955	0.09045	0	0	0	0
1604	SSL2.50CH02_15672289	SL2.50CH02	15672289	0.093	C	T	0.95113	0.04887	0	0	0	0
1605	SSL2.50CH02_15736538	SL2.50CH02	15736538	0.166	C	G	0.90852	0.09148	0	0	0	0
1606	SSL2.50CH02_15760487	SL2.50CH02	15760487	0.173	C	T	0.90452	0.09548	0	0	0	0
1607	SSL2.50CH02_15760506	SL2.50CH02	15760506	0.047	G	A	0.97613	0.02387	0	0	0	0
1608	SSL2.50CH02_15760514	SL2.50CH02	15760514	0.011	C	A	0.99429	0.00286	0.00286	0	0	0
1609	SSL2.50CH02_15760544	SL2.50CH02	15760544	0.01	C	T	0.99497	0.00503	0	0	0	0
1610	SSL2.50CH02_15775782	SL2.50CH02	15775782	0.121	A	G	0.93557	0.06443	0	0	0	0
1611	SSL2.50CH02_15828990	SL2.50CH02	15828990	0.093	G	A	0.95101	0.04899	0	0	0	0
1612	SSL2.50CH02_15989412	SL2.50CH02	15989412	0.093	C	A	0.95125	0.04875	0	0	0	0
1613	SSL2.50CH02_16559743	SL2.50CH02	16559743	0.165	A	T	0.90955	0.09045	0	0	0	0
1614	SSL2.50CH02_16559751	SL2.50CH02	16559751	0.056	T	G	0.97103	0.02897	0	0	0	0
1615	SSL2.50CH02_17950749	SL2.50CH02	17950749	0.11	A	T	0.94162	0.05838	0	0	0	0
1616	SSL2.50CH02_17970858	SL2.50CH02	17970858	0.035	A	G	0.98241	0.01759	0	0	0	0
1617	SSL2.50CH02_17970931	SL2.50CH02	17970931	0.035	T	C	0.98241	0.01759	0	0	0	0
1618	SSL2.50CH02_18374894	SL2.50CH02	18374894	0.035	C	T	0.98241	0.01759	0	0	0	0
1619	SSL2.50CH02_20277788	SL2.50CH02	20277788	0.114	G	A	0.93955	0.06045	0	0	0	0
1620	SSL2.50CH02_20277869	SL2.50CH02	20277869	0.14	T	C	0.92443	0.07557	0	0	0	0
1621	SSL2.50CH02_20334143	SL2.50CH02	20334143	0.351	C	T	0.77261	0.22739	0	0	0	0
1622	SSL2.50CH02_20334176	SL2.50CH02	20334176	0.063	T	C	0.96742	0.03258	0	0	0	0
1623	SSL2.50CH02_20334187	SL2.50CH02	20334187	0.17	A	G	0.90602	0.09398	0	0	0	0
1624	SSL2.50CH02_20334226	SL2.50CH02	20334226	0.007	G	A	0.99624	0.00376	0	0	0	0
1625	SSL2.50CH02_20374927	SL2.50CH02	20374927	0.035	A	G	0.98237	0.01763	0	0	0	0
1626	SSL2.50CH02_20819288	SL2.50CH02	20819288	0.177	A	G	0.90201	0.09799	0	0	0	0
1627	SSL2.50CH02_20819343	SL2.50CH02	20819343	0.01	C	A	0.99497	0.00503	0	0	0	0
1628	SSL2.50CH02_20851604	SL2.50CH02	20851604	0.175	C	T	0.90327	0.09673	0	0	0	0
1629	SSL2.50CH02_20851631	SL2.50CH02	20851631	0.061	A	T	0.96859	0.03141	0	0	0	0
1630	SSL2.50CH02_20851637	SL2.50CH02	20851637	0.086	G	C	0.95477	0.04523	0	0	0	0
1631	SSL2.50CH02_20851670	SL2.50CH02	20851670	0.008	G	A	0.99623	0.00377	0	0	0	0
1632	SSL2.50CH02_20851678	SL2.50CH02	20851678	0.008	G	A	0.99623	0.00377	0	0	0	0
1633	SSL2.50CH02_21271087	SL2.50CH02	21271087	0.061	T	C	0.96867	0.03133	0	0	0	0
1634	SSL2.50CH02_21271096	SL2.50CH02	21271096	0.034	G	A	0.98246	0.01754	0	0	0	0
1635	SSL2.50CH02_21271099	SL2.50CH02	21271099	0.006	G	T	0.99715	0.00285	0	0	0	0
1636	SSL2.50CH02_21306034	SL2.50CH02	21306034	0.035	A	T	0.98241	0.01759	0	0	0	0
1637	SSL2.50CH02_21306057	SL2.50CH02	21306057	0.084	G	A	0.95603	0.04397	0	0	0	0
1638	SSL2.50CH02_21306061	SL2.50CH02	21306061	0.058	G	A	0.96985	0.03015	0	0	0	0
1639	SSL2.50CH02_21384628	SL2.50CH02	21384628	0.12	C	T	0.93593	0.06407	0	0	0	0
1640	SSL2.50CH02_21482079	SL2.50CH02	21482079	0.171	A	T	0.90578	0.09422	0	0	0	0
1641	SSL2.50CH02_21482130	SL2.50CH02	21482130	0.01	A	T	0.99497	0.00503	0	0	0	0
1642	SSL2.50CH02_21482135	SL2.50CH02	21482135	0.035	G	T	0.98241	0.01759	0	0	0	0
1643	SSL2.50CH02_21482139	SL2.50CH02	21482139	0.042	T	A	0.97864	0.02136	0	0	0	0
1644	SSL2.50CH02_21482141	SL2.50CH02	21482141	0.008	G	A	0.99623	0.00377	0	0	0	0
1645	SSL2.50CH02_21482154	SL2.50CH02	21482154	0.084	C	G	0.95603	0.04397	0	0	0	0
1646	SSL2.50CH02_21482161	SL2.50CH02	21482161	0.008	G	A	0.99623	0.00377	0	0	0	0
1647	SSL2.50CH02_21772113	SL2.50CH02	21772113	0.022	T	A	0.98866	0.01134	0	0	0	0
1648	SSL2.50CH02_22090971	SL2.50CH02	22090971	0.1	T	C	0.94697	0.05303	0	0	0	0
1649	SSL2.50CH02_22090975	SL2.50CH02	22090975	0.112	T	C	0.94051	0.05949	0	0	0	0
1650	SSL2.50CH02_22090985	SL2.50CH02	22090985	0.015	A	T	0.99219	0.00781	0	0	0	0
1651	SSL2.50CH02_22090994	SL2.50CH02	22090994	0.015	C	A	0.99224	0.00776	0	0	0	0
1652	SSL2.50CH02_22231882	SL2.50CH02	22231882	0.149	A	T	0.91875	0.08125	0	0	0	0
1653	SSL2.50CH02_22231894	SL2.50CH02	22231894	0.056	C	A	0.97118	0.02882	0	0	0	0
1654	SSL2.50CH02_22520324	SL2.50CH02	22520324	0.089	C	A	0.95352	0.04648	0	0	0	0
1655	SSL2.50CH02_22567952	SL2.50CH02	22567952	0.162	A	C	0.91103	0.08897	0	0	0	0
1656	SSL2.50CH02_22568016	SL2.50CH02	22568016	0.077	G	A	0.9599	0.0401	0	0	0	0
1657	SSL2.50CH02_22568026	SL2.50CH02	22568026	0.167	T	C	0.90852	0.08897	0.00251	0	0	0
1658	SSL2.50CH02_22637419	SL2.50CH02	22637419	0.167	G	A	0.90829	0.09171	0	0	0	0
1659	SSL2.50CH02_22637431	SL2.50CH02	22637431	0.087	A	T	0.95477	0.03266	0.01256	0	0	0
1660	SSL2.50CH02_22637432	SL2.50CH02	22637432	0.025	A	T	0.98744	0.01256	0	0	0	0
1661	SSL2.50CH02_22637443	SL2.50CH02	22637443	0.063	G	A	0.96734	0.03266	0	0	0	0
1662	SSL2.50CH02_22954691	SL2.50CH02	22954691	0.086	G	A	0.95489	0.04511	0	0	0	0
1663	SSL2.50CH02_22954702	SL2.50CH02	22954702	0.172	T	C	0.905	0.095	0	0	0	0
1664	SSL2.50CH02_22975421	SL2.50CH02	22975421	0.089	G	A	0.95328	0.04672	0	0	0	0
1665	SSL2.50CH02_23172729	SL2.50CH02	23172729	0.008	T	G	0.99622	0.00378	0	0	0	0
1666	SSL2.50CH02_23172730	SL2.50CH02	23172730	0.135	C	G	0.92695	0.07305	0	0	0	0
1667	SSL2.50CH02_23172808	SL2.50CH02	23172808	0.01	C	T	0.99496	0.00504	0	0	0	0
1668	SSL2.50CH02_23172811	SL2.50CH02	23172811	0.129	T	C	0.93056	0.06944	0	0	0	0
1669	SSL2.50CH02_23284872	SL2.50CH02	23284872	0.005	T	C	0.9973	0.0027	0	0	0	0
1670	SSL2.50CH02_23284875	SL2.50CH02	23284875	0.005	G	C	0.99746	0.00254	0	0	0	0
1671	SSL2.50CH02_23284880	SL2.50CH02	23284880	0.487	G	A	0.58098	0.41902	0	0	0	0
1672	SSL2.50CH02_23284904	SL2.50CH02	23284904	0.008	A	G	0.9959	0.0041	0	0	0	0
1673	SSL2.50CH02_23284919	SL2.50CH02	23284919	0.037	C	T	0.98092	0.01908	0	0	0	0
1674	SSL2.50CH02_23284938	SL2.50CH02	23284938	0.037	T	G	0.98092	0.01908	0	0	0	0
1675	SSL2.50CH02_23284948	SL2.50CH02	23284948	0.04	A	G	0.97973	0.02027	0	0	0	0
1676	SSL2.50CH02_23335578	SL2.50CH02	23335578	0.087	A	G	0.95466	0.04534	0	0	0	0
1677	SSL2.50CH02_23362164	SL2.50CH02	23362164	0.16	G	A	0.91206	0.08794	0	0	0	0
1678	SSL2.50CH02_23362202	SL2.50CH02	23362202	0.008	T	A	0.99623	0.00377	0	0	0	0
1679	SSL2.50CH02_23362219	SL2.50CH02	23362219	0.008	T	A	0.99623	0.00377	0	0	0	0
1680	SSL2.50CH02_23377644	SL2.50CH02	23377644	0.01	C	A	0.99496	0.00504	0	0	0	0
1681	SSL2.50CH02_23377649	SL2.50CH02	23377649	0.059	A	G	0.96977	0.03023	0	0	0	0
1682	SSL2.50CH02_23377678	SL2.50CH02	23377678	0.07	A	G	0.96348	0.03652	0	0	0	0
1683	SSL2.50CH02_23377684	SL2.50CH02	23377684	0.003	G	C	0.99874	0.00126	0	0	0	0
1684	SSL2.50CH02_23488856	SL2.50CH02	23488856	0.125	G	A	0.93325	0.06675	0	0	0	0
1685	SSL2.50CH02_23612703	SL2.50CH02	23612703	0.091	T	C	0.95226	0.04774	0	0	0	0
1686	SSL2.50CH02_23612780	SL2.50CH02	23612780	0.008	G	C	0.99623	0.00377	0	0	0	0
1687	SSL2.50CH02_24131327	SL2.50CH02	24131327	0.091	C	A	0.95226	0.04774	0	0	0	0
1688	SSL2.50CH02_24131344	SL2.50CH02	24131344	0.005	T	A	0.99749	0.00251	0	0	0	0
1689	SSL2.50CH02_24131388	SL2.50CH02	24131388	0.005	T	C	0.99749	0.00251	0	0	0	0
1690	SSL2.50CH02_24210116	SL2.50CH02	24210116	0.095	T	C	0.94975	0.05025	0	0	0	0
1691	SSL2.50CH02_24420828	SL2.50CH02	24420828	0.177	T	C	0.90201	0.09799	0	0	0	0
1692	SSL2.50CH02_24420841	SL2.50CH02	24420841	0.003	G	A	0.99846	0.00154	0	0	0	0
1693	SSL2.50CH02_24420866	SL2.50CH02	24420866	0.095	G	C	0.94975	0.05025	0	0	0	0
1694	SSL2.50CH02_24420899	SL2.50CH02	24420899	0.095	A	C	0.94975	0.05025	0	0	0	0
1695	SSL2.50CH02_24607627	SL2.50CH02	24607627	0.174	T	A	0.90351	0.09649	0	0	0	0
1696	SSL2.50CH02_24607664	SL2.50CH02	24607664	0.061	A	T	0.96867	0.03133	0	0	0	0
1697	SSL2.50CH02_24667221	SL2.50CH02	24667221	0.093	G	T	0.95113	0.04887	0	0	0	0
1698	SSL2.50CH02_24688469	SL2.50CH02	24688469	0.008	T	C	0.99618	0.00382	0	0	0	0
1699	SSL2.50CH02_24688477	SL2.50CH02	24688477	0.13	T	C	0.93003	0.06997	0	0	0	0
1700	SSL2.50CH02_24712425	SL2.50CH02	24712425	0.171	C	T	0.90578	0.09422	0	0	0	0
1701	SSL2.50CH02_25166507	SL2.50CH02	25166507	0.199	A	G	0.88819	0.11181	0	0	0	0
1702	SSL2.50CH02_25775472	SL2.50CH02	25775472	0.078	C	T	0.9596	0.03788	0.00253	0	0	0
1703	SSL2.50CH02_25775503	SL2.50CH02	25775503	0.035	T	C	0.98232	0.01768	0	0	0	0
1704	SSL2.50CH02_25936999	SL2.50CH02	25936999	0.056	G	A	0.97118	0.02882	0	0	0	0
1705	SSL2.50CH02_25937002	SL2.50CH02	25937002	0.056	G	C	0.97118	0.02506	0.00376	0	0	0
1706	SSL2.50CH02_25937012	SL2.50CH02	25937012	0.164	C	T	0.90977	0.09023	0	0	0	0
1707	SSL2.50CH02_25937019	SL2.50CH02	25937019	0.022	T	G	0.98872	0.01128	0	0	0	0
1708	SSL2.50CH02_25937044	SL2.50CH02	25937044	0.005	G	A	0.99749	0.00251	0	0	0	0
1709	SSL2.50CH02_26440520	SL2.50CH02	26440520	0.108	A	C	0.9426	0.0574	0	0	0	0
1710	SSL2.50CH02_26440521	SL2.50CH02	26440521	0.107	C	A	0.94331	0.05669	0	0	0	0
1711	SSL2.50CH02_26754076	SL2.50CH02	26754076	0.037	A	G	0.98096	0.01904	0	0	0	0
1712	SSL2.50CH02_26754094	SL2.50CH02	26754094	0.147	A	G	0.92005	0.07995	0	0	0	0
1713	SSL2.50CH02_26754125	SL2.50CH02	26754125	0.078	C	T	0.95939	0.04061	0	0	0	0
1714	SSL2.50CH02_26754126	SL2.50CH02	26754126	0.106	A	G	0.94373	0.05627	0	0	0	0
1715	SSL2.50CH02_26754129	SL2.50CH02	26754129	0.003	C	T	0.99873	0.00127	0	0	0	0
1716	SSL2.50CH02_26754146	SL2.50CH02	26754146	0.106	T	C	0.94373	0.05627	0	0	0	0
1717	SSL2.50CH02_26754152	SL2.50CH02	26754152	0.107	T	G	0.94373	0.04859	0.00767	0	0	0
1718	SSL2.50CH02_26754154	SL2.50CH02	26754154	0.106	T	A	0.94373	0.05627	0	0	0	0
1719	SSL2.50CH02_26907620	SL2.50CH02	26907620	0.161	G	C	0.91206	0.08543	0.00251	0	0	0
1720	SSL2.50CH02_26907637	SL2.50CH02	26907637	0.077	C	T	0.9597	0.0403	0	0	0	0
1721	SSL2.50CH02_27048135	SL2.50CH02	27048135	0.183	A	G	0.90075	0.07161	0.02764	0	0	0
1722	SSL2.50CH02_27224271	SL2.50CH02	27224271	0.082	C	A	0.95718	0.04282	0	0	0	0
1723	SSL2.50CH02_27224290	SL2.50CH02	27224290	0.087	C	G	0.95466	0.04534	0	0	0	0
1724	SSL2.50CH02_27301798	SL2.50CH02	27301798	0.497	A	T	0.5404	0.4596	0	0	0	0
1725	SSL2.50CH02_27301829	SL2.50CH02	27301829	0.056	C	T	0.97118	0.02882	0	0	0	0
1726	SSL2.50CH02_27301849	SL2.50CH02	27301849	0.086	G	A	0.95477	0.04523	0	0	0	0
1727	SSL2.50CH02_27301851	SL2.50CH02	27301851	0.049	T	G	0.97494	0.02506	0	0	0	0
1728	SSL2.50CH02_27899741	SL2.50CH02	27899741	0.114	A	G	0.93924	0.06076	0	0	0	0
1729	SSL2.50CH02_28007745	SL2.50CH02	28007745	0.093	T	A	0.95101	0.04899	0	0	0	0
1730	SSL2.50CH02_28007762	SL2.50CH02	28007762	0.044	A	T	0.97739	0.02261	0	0	0	0
1731	SSL2.50CH02_28007798	SL2.50CH02	28007798	0.005	C	T	0.99733	0.00267	0	0	0	0
1732	SSL2.50CH02_28007805	SL2.50CH02	28007805	0.073	A	C	0.96212	0.03788	0	0	0	0
1733	SSL2.50CH02_28007820	SL2.50CH02	28007820	0.075	C	T	0.96086	0.03914	0	0	0	0
1734	SSL2.50CH02_28214321	SL2.50CH02	28214321	0.112	T	C	0.94051	0.05949	0	0	0	0
1735	SSL2.50CH02_28214350	SL2.50CH02	28214350	0.025	G	C	0.98734	0.01266	0	0	0	0
1736	SSL2.50CH02_28274556	SL2.50CH02	28274556	0.013	T	G	0.9937	0.0063	0	0	0	0
1737	SSL2.50CH02_28274559	SL2.50CH02	28274559	0.169	T	A	0.9068	0.0932	0	0	0	0
1738	SSL2.50CH02_28525485	SL2.50CH02	28525485	0.11	A	G	0.94162	0.05838	0	0	0	0
1739	SSL2.50CH02_28847497	SL2.50CH02	28847497	0.065	A	G	0.96625	0.03375	0	0	0	0
1740	SSL2.50CH02_28847519	SL2.50CH02	28847519	0.065	T	C	0.96625	0.03375	0	0	0	0
1741	SSL2.50CH02_28977349	SL2.50CH02	28977349	0.025	A	G	0.98744	0.01256	0	0	0	0
1742	SSL2.50CH02_28977368	SL2.50CH02	28977368	0.067	G	A	0.96532	0.03468	0	0	0	0
1743	SSL2.50CH02_29258409	SL2.50CH02	29258409	0.086	G	A	0.95477	0.04523	0	0	0	0
1744	SSL2.50CH02_29258425	SL2.50CH02	29258425	0.187	C	G	0.89573	0.10427	0	0	0	0
1745	SSL2.50CH02_29535242	SL2.50CH02	29535242	0.037	T	G	0.98116	0.01884	0	0	0	0
1746	SSL2.50CH02_29535284	SL2.50CH02	29535284	0.037	A	T	0.98116	0.01884	0	0	0	0
1747	SSL2.50CH02_29535294	SL2.50CH02	29535294	0.063	G	T	0.96734	0.03266	0	0	0	0
1748	SSL2.50CH02_29535312	SL2.50CH02	29535312	0.047	C	T	0.97613	0.02387	0	0	0	0
1749	SSL2.50CH02_29535328	SL2.50CH02	29535328	0.093	T	C	0.95088	0.04912	0	0	0	0
1750	SSL2.50CH02_30706106	SL2.50CH02	30706106	0.216	A	T	0.87688	0.12312	0	0	0	0
1751	SSL2.50CH02_30706114	SL2.50CH02	30706114	0.091	C	T	0.95226	0.04774	0	0	0	0
1752	SSL2.50CH02_30706115	SL2.50CH02	30706115	0.03	A	G	0.98492	0.01508	0	0	0	0
1753	SSL2.50CH02_30706143	SL2.50CH02	30706143	0.134	C	A	0.92779	0.07221	0	0	0	0
1754	SSL2.50CH02_30706187	SL2.50CH02	30706187	0.089	C	T	0.95305	0.04695	0	0	0	0
1755	SSL2.50CH02_30706192	SL2.50CH02	30706192	0.144	G	A	0.92179	0.07821	0	0	0	0
1756	SSL2.50CH02_30788664	SL2.50CH02	30788664	0.171	T	G	0.90554	0.09446	0	0	0	0
1757	SSL2.50CH02_30788695	SL2.50CH02	30788695	0.013	A	C	0.9937	0.00504	0.00126	0	0	0
1758	SSL2.50CH02_30788730	SL2.50CH02	30788730	0.115	T	A	0.93864	0.06136	0	0	0	0
1759	SSL2.50CH02_30965442	SL2.50CH02	30965442	0.025	T	C	0.98744	0.01256	0	0	0	0
1760	SSL2.50CH02_30965480	SL2.50CH02	30965480	0.025	G	T	0.98744	0.01256	0	0	0	0
1761	SSL2.50CH02_30965502	SL2.50CH02	30965502	0.005	G	A	0.99733	0.00267	0	0	0	0
1762	SSL2.50CH02_30983829	SL2.50CH02	30983829	0.037	C	T	0.98111	0.01889	0	0	0	0
1763	SSL2.50CH02_30983841	SL2.50CH02	30983841	0.077	C	T	0.9598	0.0402	0	0	0	0
1764	SSL2.50CH02_30983892	SL2.50CH02	30983892	0.008	G	A	0.99599	0.00401	0	0	0	0
1765	SSL2.50CH02_30983905	SL2.50CH02	30983905	0.042	T	G	0.97861	0.02139	0	0	0	0
1766	SSL2.50CH02_31081086	SL2.50CH02	31081086	0.054	A	G	0.97229	0.02771	0	0	0	0
1767	SSL2.50CH02_31081093	SL2.50CH02	31081093	0.118	C	G	0.93703	0.06297	0	0	0	0
1768	SSL2.50CH02_31081178	SL2.50CH02	31081178	0.183	T	C	0.89798	0.10202	0	0	0	0
1769	SSL2.50CH02_31274839	SL2.50CH02	31274839	0.171	G	C	0.90578	0.09422	0	0	0	0
1770	SSL2.50CH02_31274855	SL2.50CH02	31274855	0.089	A	G	0.95352	0.04648	0	0	0	0
1771	SSL2.50CH02_31315863	SL2.50CH02	31315863	0.02	A	G	0.9899	0.0101	0	0	0	0
1772	SSL2.50CH02_31315904	SL2.50CH02	31315904	0.068	T	G	0.96465	0.03535	0	0	0	0
1773	SSL2.50CH02_31491507	SL2.50CH02	31491507	0.175	A	C	0.90327	0.09673	0	0	0	0
1774	SSL2.50CH02_31539667	SL2.50CH02	31539667	0.109	T	G	0.94236	0.05764	0	0	0	0
1775	SSL2.50CH02_33159995	SL2.50CH02	33159995	0.037	A	T	0.98127	0.01873	0	0	0	0
1776	SSL2.50CH02_33160006	SL2.50CH02	33160006	0.096	A	T	0.94924	0.05076	0	0	0	0
1777	SSL2.50CH02_33160014	SL2.50CH02	33160014	0.037	A	G	0.98131	0.01869	0	0	0	0
1778	SSL2.50CH02_33290311	SL2.50CH02	33290311	0.02	C	A	0.9899	0.0101	0	0	0	0
1779	SSL2.50CH02_33309849	SL2.50CH02	33309849	0.481	C	T	0.59673	0.40327	0	0	0	0
1780	SSL2.50CH02_33325007	SL2.50CH02	33325007	0.127	A	G	0.9317	0.0683	0	0	0	0
1781	SSL2.50CH02_33345454	SL2.50CH02	33345454	0.003	G	A	0.99874	0.00126	0	0	0	0
1782	SSL2.50CH02_33345525	SL2.50CH02	33345525	0.075	G	A	0.96076	0.03924	0	0	0	0
1783	SSL2.50CH02_33365408	SL2.50CH02	33365408	0.169	G	A	0.90704	0.09296	0	0	0	0
1784	SSL2.50CH02_33365424	SL2.50CH02	33365424	0.058	C	G	0.96985	0.03015	0	0	0	0
1785	SSL2.50CH02_33365459	SL2.50CH02	33365459	0.025	A	G	0.98744	0.01256	0	0	0	0
1786	SSL2.50CH02_33401838	SL2.50CH02	33401838	0.005	G	T	0.99748	0.00252	0	0	0	0
1787	SSL2.50CH02_33401847	SL2.50CH02	33401847	0.019	A	G	0.99062	0.00938	0	0	0	0
1788	SSL2.50CH02_33401850	SL2.50CH02	33401850	0.019	G	C	0.99062	0.00804	0.00134	0	0	0
1789	SSL2.50CH02_33401877	SL2.50CH02	33401877	0.497	G	C	0.5403	0.4597	0	0	0	0
1790	SSL2.50CH02_33401883	SL2.50CH02	33401883	0.492	G	C	0.56297	0.43703	0	0	0	0
1791	SSL2.50CH02_33401886	SL2.50CH02	33401886	0.005	T	A	0.99746	0.00254	0	0	0	0
1792	SSL2.50CH02_33401900	SL2.50CH02	33401900	0.492	C	A	0.56853	0.4302	0.00127	0	0	0
1793	SSL2.50CH02_33401901	SL2.50CH02	33401901	0.497	C	T	0.53797	0.46203	0	0	0	0
1794	SSL2.50CH02_33401905	SL2.50CH02	33401905	0.013	C	A	0.99365	0.00635	0	0	0	0
1795	SSL2.50CH02_33401937	SL2.50CH02	33401937	0.5	A	G	0.50685	0.49315	0	0	0	0
1796	SSL2.50CH02_33435152	SL2.50CH02	33435152	0.052	A	C	0.97348	0.02652	0	0	0	0
1797	SSL2.50CH02_33435153	SL2.50CH02	33435153	0.118	A	G	0.93687	0.06313	0	0	0	0
1798	SSL2.50CH02_33435181	SL2.50CH02	33435181	0.052	C	T	0.97348	0.02652	0	0	0	0
1799	SSL2.50CH02_33435197	SL2.50CH02	33435197	0.029	G	C	0.98529	0.01471	0	0	0	0
1800	SSL2.50CH02_33640232	SL2.50CH02	33640232	0.122	T	A	0.93484	0.06516	0	0	0	0
1801	SSL2.50CH02_33673480	SL2.50CH02	33673480	0.124	A	G	0.93358	0.06642	0	0	0	0
1802	SSL2.50CH02_33673559	SL2.50CH02	33673559	0.039	A	G	0.97995	0.02005	0	0	0	0
1803	SSL2.50CH02_33706410	SL2.50CH02	33706410	0.07	A	T	0.96357	0.03643	0	0	0	0
1804	SSL2.50CH02_33706417	SL2.50CH02	33706417	0.139	C	T	0.92462	0.07538	0	0	0	0
1805	SSL2.50CH02_33706420	SL2.50CH02	33706420	0.075	T	A	0.96106	0.03894	0	0	0	0
1806	SSL2.50CH02_33849341	SL2.50CH02	33849341	0.447	T	C	0.66247	0.33753	0	0	0	0
1807	SSL2.50CH02_33849382	SL2.50CH02	33849382	0.054	C	G	0.97222	0.02778	0	0	0	0
1808	SSL2.50CH02_33957869	SL2.50CH02	33957869	0.5	T	C	0.50126	0.49874	0	0	0	0
1809	SSL2.50CH02_33957939	SL2.50CH02	33957939	0.073	A	C	0.96222	0.03778	0	0	0	0
1810	SSL2.50CH02_34157103	SL2.50CH02	34157103	0.448	A	C	0.66158	0.33842	0	0	0	0
1811	SSL2.50CH02_34157173	SL2.50CH02	34157173	0.126	A	G	0.93223	0.06777	0	0	0	0
1812	SSL2.50CH02_34298152	SL2.50CH02	34298152	0.091	C	T	0.95226	0.04774	0	0	0	0
1813	SSL2.50CH02_34298167	SL2.50CH02	34298167	0.02	A	G	0.98995	0.01005	0	0	0	0
1814	SSL2.50CH02_34298169	SL2.50CH02	34298169	0.424	A	G	0.69472	0.30528	0	0	0	0
1815	SSL2.50CH02_34366211	SL2.50CH02	34366211	0.158	G	C	0.91353	0.08647	0	0	0	0
1816	SSL2.50CH02_34366225	SL2.50CH02	34366225	0.015	C	T	0.99248	0.00752	0	0	0	0
1817	SSL2.50CH02_34366257	SL2.50CH02	34366257	0.044	G	A	0.97744	0.02256	0	0	0	0
1818	SSL2.50CH02_34366269	SL2.50CH02	34366269	0.156	A	G	0.91479	0.08521	0	0	0	0
1819	SSL2.50CH02_34445781	SL2.50CH02	34445781	0.411	C	T	0.71231	0.28518	0.00251	0	0	0
1820	SSL2.50CH02_34445832	SL2.50CH02	34445832	0.009	C	A	0.99537	0.00463	0	0	0	0
1821	SSL2.50CH02_34472675	SL2.50CH02	34472675	0.11	T	C	0.94177	0.05823	0	0	0	0
1822	SSL2.50CH02_34526292	SL2.50CH02	34526292	0.47	A	G	0.62155	0.37845	0	0	0	0
1823	SSL2.50CH02_34526295	SL2.50CH02	34526295	0.077	G	A	0.96	0.04	0	0	0	0
1824	SSL2.50CH02_34550067	SL2.50CH02	34550067	0.073	C	A	0.96222	0.03778	0	0	0	0
1825	SSL2.50CH02_34665150	SL2.50CH02	34665150	0.111	C	T	0.94081	0.05919	0	0	0	0
1826	SSL2.50CH02_34665154	SL2.50CH02	34665154	0.051	T	C	0.97399	0.02601	0	0	0	0
1827	SSL2.50CH02_34665198	SL2.50CH02	34665198	0.024	T	C	0.98769	0.01231	0	0	0	0
1828	SSL2.50CH02_34665224	SL2.50CH02	34665224	0.01	T	C	0.99496	0.00504	0	0	0	0
1829	SSL2.50CH02_34665240	SL2.50CH02	34665240	0.02	C	A	0.98992	0.01008	0	0	0	0
1830	SSL2.50CH02_34812927	SL2.50CH02	34812927	0.16	G	T	0.91206	0.08794	0	0	0	0
1831	SSL2.50CH02_34892071	SL2.50CH02	34892071	0.088	C	T	0.95385	0.04615	0	0	0	0
1832	SSL2.50CH02_34892139	SL2.50CH02	34892139	0.033	T	C	0.98333	0.01667	0	0	0	0
1833	SSL2.50CH02_35044242	SL2.50CH02	35044242	0.018	C	T	0.99112	0.00888	0	0	0	0
1834	SSL2.50CH02_35044245	SL2.50CH02	35044245	0.037	G	A	0.98101	0.01899	0	0	0	0
1835	SSL2.50CH02_35044255	SL2.50CH02	35044255	0.126	T	G	0.93257	0.06743	0	0	0	0
1836	SSL2.50CH02_35044282	SL2.50CH02	35044282	0.02	C	T	0.98985	0.00888	0.00127	0	0	0
1837	SSL2.50CH02_35160975	SL2.50CH02	35160975	0.112	A	C	0.94051	0.05823	0.00127	0	0	0
1838	SSL2.50CH02_35177583	SL2.50CH02	35177583	0.429	C	T	0.68844	0.31156	0	0	0	0
1839	SSL2.50CH02_35177673	SL2.50CH02	35177673	0.14	A	G	0.92405	0.07595	0	0	0	0
1840	SSL2.50CH02_35214047	SL2.50CH02	35214047	0.006	G	A	0.99691	0.00309	0	0	0	0
1841	SSL2.50CH02_35214050	SL2.50CH02	35214050	0.409	A	C	0.71285	0.28715	0	0	0	0
1842	SSL2.50CH02_35214093	SL2.50CH02	35214093	0.022	A	G	0.98869	0.01131	0	0	0	0
1843	SSL2.50CH02_35234235	SL2.50CH02	35234235	0.169	A	G	0.9068	0.0932	0	0	0	0
1844	SSL2.50CH02_35234265	SL2.50CH02	35234265	0.089	A	G	0.9534	0.0466	0	0	0	0
1845	SSL2.50CH02_35249895	SL2.50CH02	35249895	0.086	T	C	0.95477	0.04523	0	0	0	0
1846	SSL2.50CH02_35249977	SL2.50CH02	35249977	0.083	T	G	0.95685	0.04315	0	0	0	0
1847	SSL2.50CH02_35249980	SL2.50CH02	35249980	0.02	A	G	0.98987	0.01013	0	0	0	0
1848	SSL2.50CH02_35305333	SL2.50CH02	35305333	0.02	C	A	0.98992	0.01008	0	0	0	0
1849	SSL2.50CH02_35305342	SL2.50CH02	35305342	0.463	G	A	0.63602	0.36398	0	0	0	0
1850	SSL2.50CH02_35305381	SL2.50CH02	35305381	0.494	T	C	0.55416	0.44584	0	0	0	0
1851	SSL2.50CH02_35355339	SL2.50CH02	35355339	0.013	C	A	0.99369	0.00631	0	0	0	0
1852	SSL2.50CH02_35355343	SL2.50CH02	35355343	0.013	A	T	0.99369	0.00631	0	0	0	0
1853	SSL2.50CH02_35355350	SL2.50CH02	35355350	0.013	T	A	0.99369	0.00631	0	0	0	0
1854	SSL2.50CH02_35355352	SL2.50CH02	35355352	0.091	A	G	0.95202	0.04798	0	0	0	0
1855	SSL2.50CH02_35399831	SL2.50CH02	35399831	0.459	T	C	0.64358	0.35642	0	0	0	0
1856	SSL2.50CH02_35399836	SL2.50CH02	35399836	0.066	G	A	0.96599	0.03401	0	0	0	0
1857	SSL2.50CH02_35399857	SL2.50CH02	35399857	0.075	A	G	0.96096	0.03904	0	0	0	0
1858	SSL2.50CH02_35414951	SL2.50CH02	35414951	0.177	C	T	0.90201	0.09799	0	0	0	0
1859	SSL2.50CH02_35414993	SL2.50CH02	35414993	0.086	G	T	0.95477	0.04523	0	0	0	0
1860	SSL2.50CH02_35436046	SL2.50CH02	35436046	0.073	G	C	0.96231	0.03769	0	0	0	0
1861	SSL2.50CH02_35559021	SL2.50CH02	35559021	0.148	G	A	0.9196	0.0804	0	0	0	0
1862	SSL2.50CH02_35559084	SL2.50CH02	35559084	0.087	G	A	0.95466	0.04534	0	0	0	0
1863	SSL2.50CH02_35559090	SL2.50CH02	35559090	0.087	A	C	0.95455	0.04545	0	0	0	0
1864	SSL2.50CH02_35795369	SL2.50CH02	35795369	0.084	C	A	0.95592	0.04408	0	0	0	0
1865	SSL2.50CH02_35795382	SL2.50CH02	35795382	0.073	G	T	0.96212	0.03662	0.00126	0	0	0
1866	SSL2.50CH02_35795397	SL2.50CH02	35795397	0.146	T	C	0.92065	0.07809	0.00126	0	0	0
1867	SSL2.50CH02_35795401	SL2.50CH02	35795401	0.075	C	G	0.96096	0.03904	0	0	0	0
1868	SSL2.50CH02_35795425	SL2.50CH02	35795425	0.003	T	A	0.99845	0.00155	0	0	0	0
1869	SSL2.50CH02_35827580	SL2.50CH02	35827580	0.155	A	G	0.91519	0.08481	0	0	0	0
1870	SSL2.50CH02_36073809	SL2.50CH02	36073809	0.047	C	T	0.97613	0.02387	0	0	0	0
1871	SSL2.50CH02_36073834	SL2.50CH02	36073834	0.248	G	A	0.85516	0.14484	0	0	0	0
1872	SSL2.50CH02_36230219	SL2.50CH02	36230219	0.042	G	T	0.97859	0.02141	0	0	0	0
1873	SSL2.50CH02_36230223	SL2.50CH02	36230223	0.035	G	T	0.98219	0.01781	0	0	0	0
1874	SSL2.50CH02_36230224	SL2.50CH02	36230224	0.04	T	A	0.97971	0.02029	0	0	0	0
1875	SSL2.50CH02_36230229	SL2.50CH02	36230229	0.073	A	G	0.96193	0.03807	0	0	0	0
1876	SSL2.50CH02_36230243	SL2.50CH02	36230243	0.022	T	C	0.98864	0.01136	0	0	0	0
1877	SSL2.50CH02_36230253	SL2.50CH02	36230253	0.04	A	C	0.97984	0.02016	0	0	0	0
1878	SSL2.50CH02_36230279	SL2.50CH02	36230279	0.022	T	C	0.98864	0.01136	0	0	0	0
1879	SSL2.50CH02_36319893	SL2.50CH02	36319893	0.073	A	G	0.96231	0.03769	0	0	0	0
1880	SSL2.50CH02_36319904	SL2.50CH02	36319904	0.157	A	C	0.91583	0.05402	0.03015	0	0	0
1881	SSL2.50CH02_36319908	SL2.50CH02	36319908	0.066	G	A	0.96608	0.03392	0	0	0	0
1882	SSL2.50CH02_36319974	SL2.50CH02	36319974	0.052	A	T	0.97348	0.02652	0	0	0	0
1883	SSL2.50CH02_36319983	SL2.50CH02	36319983	0.052	G	C	0.97342	0.02658	0	0	0	0
1884	SSL2.50CH02_36441891	SL2.50CH02	36441891	0.023	T	G	0.98861	0.01139	0	0	0	0
1885	SSL2.50CH02_36441908	SL2.50CH02	36441908	0.493	T	C	0.55919	0.44081	0	0	0	0
1886	SSL2.50CH02_36441920	SL2.50CH02	36441920	0.105	A	G	0.94458	0.05542	0	0	0	0
1887	SSL2.50CH02_36441967	SL2.50CH02	36441967	0.022	T	C	0.98866	0.01134	0	0	0	0
1888	SSL2.50CH02_36582589	SL2.50CH02	36582589	0.042	T	C	0.97864	0.02136	0	0	0	0
1889	SSL2.50CH02_36582622	SL2.50CH02	36582622	0.049	G	A	0.97468	0.02532	0	0	0	0
1890	SSL2.50CH02_36582658	SL2.50CH02	36582658	0.003	C	T	0.99845	0.00155	0	0	0	0
1891	SSL2.50CH02_36608731	SL2.50CH02	36608731	0.116	C	G	0.93829	0.06171	0	0	0	0
1892	SSL2.50CH02_36608748	SL2.50CH02	36608748	0.013	A	T	0.9933	0.0067	0	0	0	0
1893	SSL2.50CH02_36608759	SL2.50CH02	36608759	0.064	G	C	0.96725	0.02393	0.00882	0	0	0
1894	SSL2.50CH02_36696643	SL2.50CH02	36696643	0.122	G	A	0.93467	0.06533	0	0	0	0
1895	SSL2.50CH02_36696707	SL2.50CH02	36696707	0.054	T	C	0.97243	0.02757	0	0	0	0
1896	SSL2.50CH02_36793352	SL2.50CH02	36793352	0.049	A	G	0.97487	0.02513	0	0	0	0
1897	SSL2.50CH02_36793379	SL2.50CH02	36793379	0.044	A	C	0.97739	0.02136	0.00126	0	0	0
1898	SSL2.50CH02_36793402	SL2.50CH02	36793402	0.079	C	T	0.95854	0.04146	0	0	0	0
1899	SSL2.50CH02_36793419	SL2.50CH02	36793419	0.082	A	G	0.95729	0.04271	0	0	0	0
1900	SSL2.50CH02_36836254	SL2.50CH02	36836254	0.003	C	G	0.99845	0.00155	0	0	0	0
1901	SSL2.50CH02_36836261	SL2.50CH02	36836261	0.068	T	G	0.96456	0.03544	0	0	0	0
1902	SSL2.50CH02_36836298	SL2.50CH02	36836298	0.121	A	T	0.93544	0.06456	0	0	0	0
1903	SSL2.50CH02_36872346	SL2.50CH02	36872346	0.181	C	A	0.89924	0.10076	0	0	0	0
1904	SSL2.50CH02_36872348	SL2.50CH02	36872348	0.162	G	A	0.9108	0.0892	0	0	0	0
1905	SSL2.50CH02_36872390	SL2.50CH02	36872390	0.03	G	A	0.98492	0.01508	0	0	0	0
1906	SSL2.50CH02_37171562	SL2.50CH02	37171562	0.213	A	C	0.87909	0.12091	0	0	0	0
1907	SSL2.50CH02_37171567	SL2.50CH02	37171567	0.027	T	C	0.98615	0.01385	0	0	0	0
1908	SSL2.50CH02_37187047	SL2.50CH02	37187047	0.247	G	T	0.85587	0.14413	0	0	0	0
1909	SSL2.50CH02_37187086	SL2.50CH02	37187086	0.03	C	T	0.98477	0.01523	0	0	0	0
1910	SSL2.50CH02_37271829	SL2.50CH02	37271829	0.047	A	G	0.97613	0.02387	0	0	0	0
1911	SSL2.50CH02_37271844	SL2.50CH02	37271844	0.177	A	G	0.90201	0.09799	0	0	0	0
1912	SSL2.50CH02_37271921	SL2.50CH02	37271921	0.037	G	T	0.98101	0.01899	0	0	0	0
1913	SSL2.50CH02_37287661	SL2.50CH02	37287661	0.192	C	T	0.89268	0.10732	0	0	0	0
1914	SSL2.50CH02_37352939	SL2.50CH02	37352939	0.41	C	T	0.71159	0.28841	0	0	0	0
1915	SSL2.50CH02_37401424	SL2.50CH02	37401424	0.009	A	G	0.99534	0.00466	0	0	0	0
1916	SSL2.50CH02_37401439	SL2.50CH02	37401439	0.242	C	T	0.85894	0.14106	0	0	0	0
1917	SSL2.50CH02_37401499	SL2.50CH02	37401499	0.005	C	A	0.99748	0.00252	0	0	0	0
1918	SSL2.50CH02_37401512	SL2.50CH02	37401512	0.006	C	T	0.9969	0.0031	0	0	0	0
1919	SSL2.50CH02_37602203	SL2.50CH02	37602203	0.345	C	T	0.77834	0.22166	0	0	0	0
1920	SSL2.50CH02_37602243	SL2.50CH02	37602243	0.063	T	C	0.96725	0.03275	0	0	0	0
1921	SSL2.50CH02_37602256	SL2.50CH02	37602256	0.098	G	A	0.94836	0.05164	0	0	0	0
1922	SSL2.50CH02_37602269	SL2.50CH02	37602269	0.054	C	T	0.97229	0.02645	0.00126	0	0	0
1923	SSL2.50CH02_37722107	SL2.50CH02	37722107	0.032	C	A	0.98363	0.01637	0	0	0	0
1924	SSL2.50CH02_37738847	SL2.50CH02	37738847	0.285	A	C	0.82824	0.17176	0	0	0	0
1925	SSL2.50CH02_37738861	SL2.50CH02	37738861	0.049	C	T	0.97481	0.02519	0	0	0	0
1926	SSL2.50CH02_37738927	SL2.50CH02	37738927	0.049	G	T	0.97481	0.02519	0	0	0	0
1927	SSL2.50CH02_37811707	SL2.50CH02	37811707	0.127	G	A	0.93199	0.06801	0	0	0	0
1928	SSL2.50CH02_37876964	SL2.50CH02	37876964	0.128	A	C	0.9313	0.0687	0	0	0	0
1929	SSL2.50CH02_37876990	SL2.50CH02	37876990	0.117	T	C	0.93766	0.06234	0	0	0	0
1930	SSL2.50CH02_37912461	SL2.50CH02	37912461	0.146	C	G	0.92085	0.07915	0	0	0	0
1931	SSL2.50CH02_37912462	SL2.50CH02	37912462	0.017	A	T	0.99121	0.00879	0	0	0	0
1932	SSL2.50CH02_37912482	SL2.50CH02	37912482	0.042	T	C	0.97864	0.02136	0	0	0	0
1933	SSL2.50CH02_37912533	SL2.50CH02	37912533	0.012	T	C	0.99372	0.00628	0	0	0	0
1934	SSL2.50CH02_37935638	SL2.50CH02	37935638	0.134	A	G	0.92766	0.07234	0	0	0	0
1935	SSL2.50CH02_37980898	SL2.50CH02	37980898	0.054	G	A	0.97229	0.02771	0	0	0	0
1936	SSL2.50CH02_37980900	SL2.50CH02	37980900	0.075	G	A	0.96096	0.03904	0	0	0	0
1937	SSL2.50CH02_37980971	SL2.50CH02	37980971	0.071	T	C	0.96338	0.03662	0	0	0	0
1938	SSL2.50CH02_37980987	SL2.50CH02	37980987	0.075	G	A	0.96086	0.03914	0	0	0	0
1939	SSL2.50CH02_38001714	SL2.50CH02	38001714	0.137	G	A	0.92607	0.07393	0	0	0	0
1940	SSL2.50CH02_38001765	SL2.50CH02	38001765	0.091	G	A	0.95238	0.04762	0	0	0	0
1941	SSL2.50CH02_38001766	SL2.50CH02	38001766	0.225	C	T	0.87093	0.12907	0	0	0	0
1942	SSL2.50CH02_38026454	SL2.50CH02	38026454	0.015	G	A	0.99244	0.00756	0	0	0	0
1943	SSL2.50CH02_38026462	SL2.50CH02	38026462	0.159	C	T	0.9131	0.0869	0	0	0	0
1944	SSL2.50CH02_38096665	SL2.50CH02	38096665	0.16	G	T	0.91206	0.08794	0	0	0	0
1945	SSL2.50CH02_38096688	SL2.50CH02	38096688	0.052	A	C	0.97335	0.02665	0	0	0	0
1946	SSL2.50CH02_38111769	SL2.50CH02	38111769	0.039	T	C	0.9799	0.0201	0	0	0	0
1947	SSL2.50CH02_38111780	SL2.50CH02	38111780	0.039	A	G	0.97985	0.02015	0	0	0	0
1948	SSL2.50CH02_38111816	SL2.50CH02	38111816	0.066	T	C	0.96582	0.03291	0.00127	0	0	0
1949	SSL2.50CH02_38111826	SL2.50CH02	38111826	0.008	T	A	0.99576	0.00424	0	0	0	0
1950	SSL2.50CH02_38111827	SL2.50CH02	38111827	0.039	T	A	0.97994	0.02006	0	0	0	0
1951	SSL2.50CH02_38111854	SL2.50CH02	38111854	0.038	C	T	0.98087	0.01913	0	0	0	0
1952	SSL2.50CH02_38174680	SL2.50CH02	38174680	0.023	C	A	0.98854	0.01146	0	0	0	0
1953	SSL2.50CH02_38174727	SL2.50CH02	38174727	0.056	C	A	0.97098	0.02902	0	0	0	0
1954	SSL2.50CH02_38190962	SL2.50CH02	38190962	0.073	A	G	0.96231	0.03769	0	0	0	0
1955	SSL2.50CH02_38190968	SL2.50CH02	38190968	0.167	A	T	0.90829	0.09171	0	0	0	0
1956	SSL2.50CH02_38205933	SL2.50CH02	38205933	0.466	C	T	0.63098	0.36902	0	0	0	0
1957	SSL2.50CH02_38205965	SL2.50CH02	38205965	0.165	A	G	0.90932	0.09068	0	0	0	0
1958	SSL2.50CH02_38205990	SL2.50CH02	38205990	0.054	T	G	0.97229	0.02771	0	0	0	0
1959	SSL2.50CH02_38221684	SL2.50CH02	38221684	0.175	G	A	0.90302	0.09698	0	0	0	0
1960	SSL2.50CH02_38221733	SL2.50CH02	38221733	0.114	A	G	0.93939	0.06061	0	0	0	0
1961	SSL2.50CH02_38221734	SL2.50CH02	38221734	0.112	A	G	0.94066	0.05934	0	0	0	0
1962	SSL2.50CH02_38282321	SL2.50CH02	38282321	0.148	G	A	0.9196	0.0804	0	0	0	0
1963	SSL2.50CH02_38282365	SL2.50CH02	38282365	0.061	T	C	0.96859	0.03141	0	0	0	0
1964	SSL2.50CH02_38282371	SL2.50CH02	38282371	0.012	T	A	0.99372	0.00628	0	0	0	0
1965	SSL2.50CH02_38282388	SL2.50CH02	38282388	0.049	G	C	0.97487	0.02513	0	0	0	0
1966	SSL2.50CH02_38298083	SL2.50CH02	38298083	0.142	T	C	0.92337	0.07663	0	0	0	0
1967	SSL2.50CH02_38298095	SL2.50CH02	38298095	0.47	T	C	0.62217	0.37783	0	0	0	0
1968	SSL2.50CH02_38298096	SL2.50CH02	38298096	0.032	T	C	0.98391	0.01609	0	0	0	0
1969	SSL2.50CH02_38298159	SL2.50CH02	38298159	0.058	G	A	0.96985	0.03015	0	0	0	0
1970	SSL2.50CH02_38335619	SL2.50CH02	38335619	0.124	A	C	0.93342	0.06658	0	0	0	0
1971	SSL2.50CH02_38335631	SL2.50CH02	38335631	0.023	A	T	0.98861	0.01139	0	0	0	0
1972	SSL2.50CH02_38335689	SL2.50CH02	38335689	0.01	T	C	0.99497	0.00503	0	0	0	0
1973	SSL2.50CH02_38483516	SL2.50CH02	38483516	0.151	T	C	0.91793	0.08207	0	0	0	0
1974	SSL2.50CH02_38518022	SL2.50CH02	38518022	0.12	A	G	0.93561	0.06439	0	0	0	0
1975	SSL2.50CH02_38518062	SL2.50CH02	38518062	0.035	A	G	0.98232	0.01768	0	0	0	0
1976	SSL2.50CH02_38612312	SL2.50CH02	38612312	0.173	T	C	0.90452	0.09548	0	0	0	0
1977	SSL2.50CH02_38629014	SL2.50CH02	38629014	0.045	T	A	0.97704	0.02296	0	0	0	0
1978	SSL2.50CH02_38629066	SL2.50CH02	38629066	0.042	C	A	0.97837	0.02163	0	0	0	0
1979	SSL2.50CH02_38779908	SL2.50CH02	38779908	0.146	C	T	0.92085	0.07915	0	0	0	0
1980	SSL2.50CH02_38779967	SL2.50CH02	38779967	0.073	G	C	0.96222	0.03778	0	0	0	0
1981	SSL2.50CH02_38779969	SL2.50CH02	38779969	0.027	T	A	0.98615	0.01385	0	0	0	0
1982	SSL2.50CH02_38795453	SL2.50CH02	38795453	0.162	A	G	0.9108	0.0892	0	0	0	0
1983	SSL2.50CH02_39050174	SL2.50CH02	39050174	0.026	A	T	0.98705	0.01295	0	0	0	0
1984	SSL2.50CH02_39050259	SL2.50CH02	39050259	0.01	C	T	0.99485	0.00515	0	0	0	0
1985	SSL2.50CH02_39097032	SL2.50CH02	39097032	0.16	T	C	0.91228	0.08772	0	0	0	0
1986	SSL2.50CH02_39097114	SL2.50CH02	39097114	0.058	G	A	0.96992	0.03008	0	0	0	0
1987	SSL2.50CH02_39204711	SL2.50CH02	39204711	0.167	A	G	0.90806	0.09194	0	0	0	0
1988	SSL2.50CH02_39204769	SL2.50CH02	39204769	0.084	G	C	0.95592	0.04408	0	0	0	0
1989	SSL2.50CH02_39204781	SL2.50CH02	39204781	0.084	A	T	0.95592	0.04408	0	0	0	0
1990	SSL2.50CH02_39204785	SL2.50CH02	39204785	0.009	G	A	0.99536	0.00464	0	0	0	0
1991	SSL2.50CH02_39220403	SL2.50CH02	39220403	0.14	C	G	0.92443	0.07557	0	0	0	0
1992	SSL2.50CH02_39220419	SL2.50CH02	39220419	0.052	A	T	0.97355	0.02645	0	0	0	0
1993	SSL2.50CH02_39237479	SL2.50CH02	39237479	0.111	G	A	0.94095	0.05905	0	0	0	0
1994	SSL2.50CH02_39321192	SL2.50CH02	39321192	0.012	A	T	0.99372	0.00628	0	0	0	0
1995	SSL2.50CH02_39321214	SL2.50CH02	39321214	0.118	T	C	0.93719	0.06281	0	0	0	0
1996	SSL2.50CH02_39321235	SL2.50CH02	39321235	0.01	T	A	0.99497	0.00503	0	0	0	0
1997	SSL2.50CH02_39321284	SL2.50CH02	39321284	0.08	A	T	0.95844	0.04156	0	0	0	0
[truncated: 10,004 more rows]

## Sheet: Supplementary Table S6
Supplementary Table S6: PIC values of the target SNPs identified in the tomato genepool
Site Number	Site Name	Chromosome	Physical Position	PIC	Major Allele Frequency	Minor Allele Frequency	Allele 3 Frequency	Allele 4 Frequency	Allele 5 Frequency	Allele 6 Frequency
0	SSL2.50CH01_47132	SL2.50CH01	47132	0.08	0.95844	0.04156	0	0	0	0
1	SSL2.50CH01_65869	SL2.50CH01	65869	0.171	0.90578	0.09422	0	0	0	0
2	SSL2.50CH01_102276	SL2.50CH01	102276	0.17	0.90602	0.09398	0	0	0	0
3	SSL2.50CH01_124802	SL2.50CH01	124802	0.061	0.96867	0.03133	0	0	0	0
4	SSL2.50CH01_165222	SL2.50CH01	165222	0.092	0.95165	0.04835	0	0	0	0
5	SSL2.50CH01_211023	SL2.50CH01	211023	0.479	0.60178	0.39822	0	0	0	0
6	SSL2.50CH01_241420	SL2.50CH01	241420	0.167	0.90811	0.09189	0	0	0	0
7	SSL2.50CH01_276202	SL2.50CH01	276202	0.111	0.94095	0.05905	0	0	0	0
8	SSL2.50CH01_309021	SL2.50CH01	309021	0.077	0.95974	0.04026	0	0	0	0
9	SSL2.50CH01_339312	SL2.50CH01	339312	0.414	0.70729	0.29271	0	0	0	0
10	SSL2.50CH01_369759	SL2.50CH01	369759	0.03	0.98489	0.01511	0	0	0	0
11	SSL2.50CH01_416855	SL2.50CH01	416855	0.454	0.65152	0.34848	0	0	0	0
12	SSL2.50CH01_481922	SL2.50CH01	481922	0.169	0.90704	0.09296	0	0	0	0
13	SSL2.50CH01_514472	SL2.50CH01	514472	0.122	0.93467	0.06533	0	0	0	0
14	SSL2.50CH01_530378	SL2.50CH01	530378	0.127	0.93205	0.06795	0	0	0	0
15	SSL2.50CH01_597385	SL2.50CH01	597385	0.143	0.92278	0.07722	0	0	0	0
16	SSL2.50CH01_665613	SL2.50CH01	665613	0.12	0.93609	0.06391	0	0	0	0
17	SSL2.50CH01_730154	SL2.50CH01	730154	0.32	0.79975	0.20025	0	0	0	0
18	SSL2.50CH01_934765	SL2.50CH01	934765	0.159	0.9131	0.0869	0	0	0	0
19	SSL2.50CH01_951133	SL2.50CH01	951133	0.16	0.91206	0.08794	0	0	0	0
20	SSL2.50CH01_981640	SL2.50CH01	981640	0.071	0.96329	0.03671	0	0	0	0
21	SSL2.50CH01_1047963	SL2.50CH01	1047963	0.167	0.90829	0.09171	0	0	0	0
22	SSL2.50CH01_1064992	SL2.50CH01	1064992	0.329	0.79219	0.20781	0	0	0	0
23	SSL2.50CH01_1082191	SL2.50CH01	1082191	0.015	0.99242	0.00758	0	0	0	0
24	SSL2.50CH01_1198245	SL2.50CH01	1198245	0.106	0.94359	0.05641	0	0	0	0
25	SSL2.50CH01_1217274	SL2.50CH01	1217274	0.158	0.91332	0.08668	0	0	0	0
26	SSL2.50CH01_1367269	SL2.50CH01	1367269	0.105	0.9443	0.0557	0	0	0	0
27	SSL2.50CH01_1390838	SL2.50CH01	1390838	0.012	0.99372	0.00628	0	0	0	0
28	SSL2.50CH01_1443423	SL2.50CH01	1443423	0.16	0.91479	0.04511	0.0401	0	0	0
29	SSL2.50CH01_1506642	SL2.50CH01	1506642	0.124	0.93358	0.06642	0	0	0	0
30	SSL2.50CH01_1552641	SL2.50CH01	1552641	0.035	0.98228	0.01772	0	0	0	0
31	SSL2.50CH01_1649561	SL2.50CH01	1649561	0.049	0.97487	0.02513	0	0	0	0
32	SSL2.50CH01_1711997	SL2.50CH01	1711997	0.161	0.91184	0.08816	0	0	0	0
33	SSL2.50CH01_1801072	SL2.50CH01	1801072	0.084	0.95614	0.04386	0	0	0	0
34	SSL2.50CH01_1820852	SL2.50CH01	1820852	0.166	0.90852	0.09148	0	0	0	0
35	SSL2.50CH01_1904070	SL2.50CH01	1904070	0.155	0.9154	0.0846	0	0	0	0
36	SSL2.50CH01_1939537	SL2.50CH01	1939537	0.157	0.91436	0.08564	0	0	0	0
37	SSL2.50CH01_1955432	SL2.50CH01	1955432	0.08	0.95844	0.04156	0	0	0	0
38	SSL2.50CH01_2062228	SL2.50CH01	2062228	0.163	0.91058	0.08942	0	0	0	0
39	SSL2.50CH01_2096031	SL2.50CH01	2096031	0.144	0.92191	0.07809	0	0	0	0
40	SSL2.50CH01_2111830	SL2.50CH01	2111830	0.072	0.96282	0.03718	0	0	0	0
41	SSL2.50CH01_2127040	SL2.50CH01	2127040	0.027	0.98608	0.01392	0	0	0	0
42	SSL2.50CH01_2171966	SL2.50CH01	2171966	0.17	0.90602	0.09398	0	0	0	0
43	SSL2.50CH01_2218618	SL2.50CH01	2218618	0.146	0.92085	0.07915	0	0	0	0
44	SSL2.50CH01_2241707	SL2.50CH01	2241707	0.049	0.97494	0.02506	0	0	0	0
45	SSL2.50CH01_2259594	SL2.50CH01	2259594	0.468	0.6272	0.3728	0	0	0	0
46	SSL2.50CH01_2343319	SL2.50CH01	2343319	0.376	0.74874	0.25126	0	0	0	0
47	SSL2.50CH01_2431577	SL2.50CH01	2431577	0.007	0.99624	0.00376	0	0	0	0
48	SSL2.50CH01_2524216	SL2.50CH01	2524216	0.168	0.90727	0.09273	0	0	0	0
49	SSL2.50CH01_2569887	SL2.50CH01	2569887	0.148	0.9194	0.0806	0	0	0	0
50	SSL2.50CH01_2624403	SL2.50CH01	2624403	0.162	0.9108	0.0892	0	0	0	0
51	SSL2.50CH01_2722388	SL2.50CH01	2722388	0.181	0.8995	0.1005	0	0	0	0
52	SSL2.50CH01_2770499	SL2.50CH01	2770499	0.075	0.96115	0.03885	0	0	0	0
53	SSL2.50CH01_2854938	SL2.50CH01	2854938	0.1	0.9473	0.0527	0	0	0	0
54	SSL2.50CH01_2870658	SL2.50CH01	2870658	0.16	0.91206	0.08794	0	0	0	0
55	SSL2.50CH01_2936823	SL2.50CH01	2936823	0.167	0.90829	0.09171	0	0	0	0
56	SSL2.50CH01_2995075	SL2.50CH01	2995075	0.054	0.97236	0.02764	0	0	0	0
57	SSL2.50CH01_3027230	SL2.50CH01	3027230	0.088	0.95363	0.04637	0	0	0	0
58	SSL2.50CH01_3043427	SL2.50CH01	3043427	0.174	0.90351	0.09649	0	0	0	0
59	SSL2.50CH01_3106357	SL2.50CH01	3106357	0.135	0.92732	0.07268	0	0	0	0
60	SSL2.50CH01_3165197	SL2.50CH01	3165197	0.142	0.92337	0.07663	0	0	0	0
61	SSL2.50CH01_3261845	SL2.50CH01	3261845	0.085	0.95547	0.04453	0	0	0	0
62	SSL2.50CH01_3303855	SL2.50CH01	3303855	0.169	0.90704	0.09296	0	0	0	0
63	SSL2.50CH01_3485974	SL2.50CH01	3485974	0.134	0.92766	0.07234	0	0	0	0
64	SSL2.50CH01_3502184	SL2.50CH01	3502184	0.035	0.98237	0.01763	0	0	0	0
65	SSL2.50CH01_3622239	SL2.50CH01	3622239	0.068	0.96474	0.03526	0	0	0	0
66	SSL2.50CH01_3662955	SL2.50CH01	3662955	0.058	0.96992	0.03008	0	0	0	0
67	SSL2.50CH01_3677982	SL2.50CH01	3677982	0.127	0.9317	0.0683	0	0	0	0
68	SSL2.50CH01_3725366	SL2.50CH01	3725366	0.022	0.98869	0.01131	0	0	0	0
69	SSL2.50CH01_3881012	SL2.50CH01	3881012	0.192	0.89223	0.10777	0	0	0	0
70	SSL2.50CH01_3897466	SL2.50CH01	3897466	0.102	0.94598	0.05402	0	0	0	0
71	SSL2.50CH01_4156536	SL2.50CH01	4156536	0.394	0.73048	0.26952	0	0	0	0
72	SSL2.50CH01_4369364	SL2.50CH01	4369364	0.086	0.95477	0.04523	0	0	0	0
73	SSL2.50CH01_4462996	SL2.50CH01	4462996	0.171	0.90554	0.09446	0	0	0	0
74	SSL2.50CH01_4479995	SL2.50CH01	4479995	0.175	0.90327	0.09673	0	0	0	0
75	SSL2.50CH01_4495067	SL2.50CH01	4495067	0.082	0.95729	0.04271	0	0	0	0
76	SSL2.50CH01_4521223	SL2.50CH01	4521223	0.122	0.93451	0.06549	0	0	0	0
77	SSL2.50CH01_4594589	SL2.50CH01	4594589	0.144	0.92211	0.07789	0	0	0	0
78	SSL2.50CH01_4612820	SL2.50CH01	4612820	0.03	0.98473	0.01527	0	0	0	0
79	SSL2.50CH01_4657425	SL2.50CH01	4657425	0.025	0.98737	0.01263	0	0	0	0
80	SSL2.50CH01_4975770	SL2.50CH01	4975770	0.098	0.9481	0.0519	0	0	0	0
81	SSL2.50CH01_5078745	SL2.50CH01	5078745	0.049	0.97481	0.02519	0	0	0	0
82	SSL2.50CH01_5153996	SL2.50CH01	5153996	0.051	0.97368	0.02632	0	0	0	0
83	SSL2.50CH01_5692244	SL2.50CH01	5692244	0.059	0.96931	0.03069	0	0	0	0
84	SSL2.50CH01_6309461	SL2.50CH01	6309461	0.023	0.98831	0.01169	0	0	0	0
85	SSL2.50CH01_6615971	SL2.50CH01	6615971	0.236	0.86307	0.13693	0	0	0	0
86	SSL2.50CH01_7594018	SL2.50CH01	7594018	0.36	0.76448	0.23552	0	0	0	0
87	SSL2.50CH01_8145754	SL2.50CH01	8145754	0.131	0.92982	0.07018	0	0	0	0
88	SSL2.50CH01_8456200	SL2.50CH01	8456200	0.101	0.94656	0.05344	0	0	0	0
89	SSL2.50CH01_9220353	SL2.50CH01	9220353	0.044	0.97733	0.02267	0	0	0	0
90	SSL2.50CH01_9579499	SL2.50CH01	9579499	0.047	0.97601	0.02399	0	0	0	0
91	SSL2.50CH01_10418998	SL2.50CH01	10418998	0.103	0.94557	0.05443	0	0	0	0
92	SSL2.50CH01_11273187	SL2.50CH01	11273187	0.158	0.91353	0.08647	0	0	0	0
93	SSL2.50CH01_11740861	SL2.50CH01	11740861	0.155	0.91562	0.08438	0	0	0	0
94	SSL2.50CH01_11843460	SL2.50CH01	11843460	0.127	0.93165	0.06835	0	0	0	0
95	SSL2.50CH01_11927861	SL2.50CH01	11927861	0.122	0.93478	0.06522	0	0	0	0
96	SSL2.50CH01_11954038	SL2.50CH01	11954038	0.161	0.91332	0.06784	0.01884	0	0	0
97	SSL2.50CH01_12010391	SL2.50CH01	12010391	0.149	0.91919	0.07828	0.00253	0	0	0
98	SSL2.50CH01_14016256	SL2.50CH01	14016256	0.142	0.92337	0.07663	0	0	0	0
99	SSL2.50CH01_14523798	SL2.50CH01	14523798	0.133	0.92839	0.07161	0	0	0	0
100	SSL2.50CH01_15579075	SL2.50CH01	15579075	0.146	0.92045	0.07955	0	0	0	0
101	SSL2.50CH01_16025197	SL2.50CH01	16025197	0.108	0.94275	0.05725	0	0	0	0
102	SSL2.50CH01_18225087	SL2.50CH01	18225087	0.126	0.93308	0.05808	0.00884	0	0	0
103	SSL2.50CH01_18411106	SL2.50CH01	18411106	0.118	0.93687	0.06313	0	0	0	0
104	SSL2.50CH01_19041940	SL2.50CH01	19041940	0.127	0.93182	0.06818	0	0	0	0
105	SSL2.50CH01_19476373	SL2.50CH01	19476373	0.116	0.93813	0.06187	0	0	0	0
106	SSL2.50CH01_20001266	SL2.50CH01	20001266	0.042	0.9787	0.0188	0.00251	0	0	0
107	SSL2.50CH01_20932341	SL2.50CH01	20932341	0.071	0.96292	0.03708	0	0	0	0
108	SSL2.50CH01_22321985	SL2.50CH01	22321985	0.008	0.99622	0.00378	0	0	0	0
109	SSL2.50CH01_22564095	SL2.50CH01	22564095	0.307	0.81057	0.18943	0	0	0	0
110	SSL2.50CH01_23177944	SL2.50CH01	23177944	0.171	0.90578	0.09422	0	0	0	0
111	SSL2.50CH01_23934659	SL2.50CH01	23934659	0.084	0.95592	0.04408	0	0	0	0
112	SSL2.50CH01_24107776	SL2.50CH01	24107776	0.098	0.9481	0.0519	0	0	0	0
113	SSL2.50CH01_24183773	SL2.50CH01	24183773	0.082	0.95739	0.04261	0	0	0	0
114	SSL2.50CH01_24866174	SL2.50CH01	24866174	0.118	0.93681	0.06319	0	0	0	0
115	SSL2.50CH01_25350896	SL2.50CH01	25350896	0.092	0.95165	0.04835	0	0	0	0
116	SSL2.50CH01_25366131	SL2.50CH01	25366131	0.119	0.93655	0.06345	0	0	0	0
117	SSL2.50CH01_25381307	SL2.50CH01	25381307	0.087	0.95443	0.04557	0	0	0	0
118	SSL2.50CH01_26443977	SL2.50CH01	26443977	0.079	0.95865	0.04135	0	0	0	0
119	SSL2.50CH01_27395501	SL2.50CH01	27395501	0.148	0.9198	0.0802	0	0	0	0
120	SSL2.50CH01_27746744	SL2.50CH01	27746744	0.089	0.95328	0.04672	0	0	0	0
121	SSL2.50CH01_27816931	SL2.50CH01	27816931	0.085	0.9557	0.0443	0	0	0	0
122	SSL2.50CH01_29352603	SL2.50CH01	29352603	0.08	0.95844	0.04156	0	0	0	0
123	SSL2.50CH01_30938195	SL2.50CH01	30938195	0.084	0.95581	0.04419	0	0	0	0
124	SSL2.50CH01_32101143	SL2.50CH01	32101143	0.043	0.97821	0.02179	0	0	0	0
125	SSL2.50CH01_32489254	SL2.50CH01	32489254	0.121	0.93528	0.06472	0	0	0	0
126	SSL2.50CH01_32938327	SL2.50CH01	32938327	0.169	0.90704	0.09296	0	0	0	0
127	SSL2.50CH01_35295306	SL2.50CH01	35295306	0.118	0.93703	0.06297	0	0	0	0
128	SSL2.50CH01_35345492	SL2.50CH01	35345492	0.159	0.9131	0.0869	0	0	0	0
129	SSL2.50CH01_36266136	SL2.50CH01	36266136	0.15	0.91834	0.0804	0.00126	0	0	0
130	SSL2.50CH01_39925266	SL2.50CH01	39925266	0.367	0.75754	0.24246	0	0	0	0
131	SSL2.50CH01_40835534	SL2.50CH01	40835534	0.082	0.95729	0.04271	0	0	0	0
132	SSL2.50CH01_41235319	SL2.50CH01	41235319	0.162	0.9108	0.0892	0	0	0	0
133	SSL2.50CH01_41513237	SL2.50CH01	41513237	0.082	0.95729	0.04271	0	0	0	0
134	SSL2.50CH01_42525846	SL2.50CH01	42525846	0.09	0.95293	0.04707	0	0	0	0
135	SSL2.50CH01_43096841	SL2.50CH01	43096841	0.156	0.91479	0.08521	0	0	0	0
136	SSL2.50CH01_43254406	SL2.50CH01	43254406	0.34	0.78299	0.21701	0	0	0	0
137	SSL2.50CH01_43295663	SL2.50CH01	43295663	0.165	0.90955	0.09045	0	0	0	0
138	SSL2.50CH01_43334925	SL2.50CH01	43334925	0.366	0.75879	0.24121	0	0	0	0
139	SSL2.50CH01_43353056	SL2.50CH01	43353056	0.01	0.99496	0.00504	0	0	0	0
140	SSL2.50CH01_43848457	SL2.50CH01	43848457	0.115	0.93893	0.06107	0	0	0	0
141	SSL2.50CH01_44121502	SL2.50CH01	44121502	0.161	0.91184	0.08816	0	0	0	0
142	SSL2.50CH01_44328288	SL2.50CH01	44328288	0.077	0.9599	0.0401	0	0	0	0
143	SSL2.50CH01_46847997	SL2.50CH01	46847997	0.156	0.91457	0.08543	0	0	0	0
144	SSL2.50CH01_48053224	SL2.50CH01	48053224	0.091	0.95202	0.04798	0	0	0	0
145	SSL2.50CH01_48160356	SL2.50CH01	48160356	0.078	0.95929	0.04071	0	0	0	0
146	SSL2.50CH01_48378742	SL2.50CH01	48378742	0.154	0.91583	0.08417	0	0	0	0
147	SSL2.50CH01_48425590	SL2.50CH01	48425590	0.084	0.95614	0.04386	0	0	0	0
148	SSL2.50CH01_53294729	SL2.50CH01	53294729	0.167	0.90806	0.09194	0	0	0	0
149	SSL2.50CH01_53595340	SL2.50CH01	53595340	0.149	0.91875	0.08125	0	0	0	0
150	SSL2.50CH01_53737451	SL2.50CH01	53737451	0.129	0.93059	0.06941	0	0	0	0
151	SSL2.50CH01_55022293	SL2.50CH01	55022293	0.084	0.95614	0.04386	0	0	0	0
152	SSL2.50CH01_55528816	SL2.50CH01	55528816	0.164	0.90977	0.09023	0	0	0	0
153	SSL2.50CH01_56251481	SL2.50CH01	56251481	0.039	0.9799	0.0201	0	0	0	0
154	SSL2.50CH01_56465941	SL2.50CH01	56465941	0.136	0.9264	0.0736	0	0	0	0
155	SSL2.50CH01_56745853	SL2.50CH01	56745853	0.161	0.91228	0.08396	0.00376	0	0	0
156	SSL2.50CH01_56767903	SL2.50CH01	56767903	0.15	0.91814	0.08186	0	0	0	0
157	SSL2.50CH01_56988109	SL2.50CH01	56988109	0.084	0.95603	0.04397	0	0	0	0
158	SSL2.50CH01_57380023	SL2.50CH01	57380023	0.076	0.96066	0.03934	0	0	0	0
159	SSL2.50CH01_58365158	SL2.50CH01	58365158	0.081	0.95791	0.04209	0	0	0	0
160	SSL2.50CH01_59845614	SL2.50CH01	59845614	0.075	0.96106	0.03894	0	0	0	0
161	SSL2.50CH01_60446523	SL2.50CH01	60446523	0.094	0.95038	0.04962	0	0	0	0
162	SSL2.50CH01_60774591	SL2.50CH01	60774591	0.151	0.9175	0.0825	0	0	0	0
163	SSL2.50CH01_60815312	SL2.50CH01	60815312	0.044	0.97744	0.02256	0	0	0	0
164	SSL2.50CH01_60885494	SL2.50CH01	60885494	0.152	0.91729	0.08271	0	0	0	0
165	SSL2.50CH01_60901149	SL2.50CH01	60901149	0.162	0.9108	0.0892	0	0	0	0
166	SSL2.50CH01_60983712	SL2.50CH01	60983712	0.105	0.94416	0.05584	0	0	0	0
167	SSL2.50CH01_61033091	SL2.50CH01	61033091	0.114	0.93943	0.06057	0	0	0	0
168	SSL2.50CH01_61242367	SL2.50CH01	61242367	0.02	0.98995	0.01005	0	0	0	0
169	SSL2.50CH01_61544591	SL2.50CH01	61544591	0.142	0.92337	0.07663	0	0	0	0
170	SSL2.50CH01_61880986	SL2.50CH01	61880986	0.146	0.92085	0.07915	0	0	0	0
171	SSL2.50CH01_62808259	SL2.50CH01	62808259	0.135	0.92695	0.07305	0	0	0	0
172	SSL2.50CH01_62846362	SL2.50CH01	62846362	0.16	0.91228	0.08772	0	0	0	0
173	SSL2.50CH01_63481986	SL2.50CH01	63481986	0.129	0.93056	0.06944	0	0	0	0
174	SSL2.50CH01_63550400	SL2.50CH01	63550400	0.152	0.91688	0.08312	0	0	0	0
175	SSL2.50CH01_63864873	SL2.50CH01	63864873	0.157	0.91436	0.08564	0	0	0	0
176	SSL2.50CH01_64054845	SL2.50CH01	64054845	0.157	0.91436	0.08564	0	0	0	0
177	SSL2.50CH01_64149219	SL2.50CH01	64149219	0.353	0.77146	0.22854	0	0	0	0
178	SSL2.50CH01_64165763	SL2.50CH01	64165763	0.158	0.91332	0.08668	0	0	0	0
179	SSL2.50CH01_64322523	SL2.50CH01	64322523	0.127	0.93165	0.06835	0	0	0	0
180	SSL2.50CH01_64954125	SL2.50CH01	64954125	0.157	0.91414	0.08586	0	0	0	0
181	SSL2.50CH01_65869742	SL2.50CH01	65869742	0.163	0.91058	0.08942	0	0	0	0
182	SSL2.50CH01_65885155	SL2.50CH01	65885155	0.146	0.92085	0.07915	0	0	0	0
183	SSL2.50CH01_66483776	SL2.50CH01	66483776	0.155	0.91562	0.08438	0	0	0	0
184	SSL2.50CH01_67338865	SL2.50CH01	67338865	0.047	0.97581	0.02285	0.00134	0	0	0
185	SSL2.50CH01_69261627	SL2.50CH01	69261627	0.121	0.93544	0.06329	0.00127	0	0	0
186	SSL2.50CH01_69280600	SL2.50CH01	69280600	0.374	0.76692	0.18922	0.04386	0	0	0
187	SSL2.50CH01_69458322	SL2.50CH01	69458322	0.161	0.91184	0.08816	0	0	0	0
188	SSL2.50CH01_69502394	SL2.50CH01	69502394	0.022	0.98869	0.01131	0	0	0	0
189	SSL2.50CH01_71739470	SL2.50CH01	71739470	0.112	0.9402	0.0598	0	0	0	0
190	SSL2.50CH01_71787796	SL2.50CH01	71787796	0.098	0.94823	0.05177	0	0	0	0
191	SSL2.50CH01_72315460	SL2.50CH01	72315460	0.191	0.89322	0.10678	0	0	0	0
192	SSL2.50CH01_72330907	SL2.50CH01	72330907	0.158	0.91353	0.08647	0	0	0	0
193	SSL2.50CH01_72450989	SL2.50CH01	72450989	0.117	0.93766	0.06107	0.00127	0	0	0
194	SSL2.50CH01_72715423	SL2.50CH01	72715423	0.09	0.95305	0.04569	0.00127	0	0	0
195	SSL2.50CH01_73047151	SL2.50CH01	73047151	0.165	0.90932	0.09068	0	0	0	0
196	SSL2.50CH01_73100542	SL2.50CH01	73100542	0.183	0.89824	0.10176	0	0	0	0
197	SSL2.50CH01_73714299	SL2.50CH01	73714299	0.12	0.93573	0.06427	0	0	0	0
198	SSL2.50CH01_74162755	SL2.50CH01	74162755	0.088	0.95396	0.04604	0	0	0	0
199	SSL2.50CH01_74238804	SL2.50CH01	74238804	0.151	0.91793	0.08207	0	0	0	0
200	SSL2.50CH01_74646467	SL2.50CH01	74646467	0.117	0.93782	0.06218	0	0	0	0
201	SSL2.50CH01_74696544	SL2.50CH01	74696544	0.129	0.93073	0.06927	0	0	0	0
202	SSL2.50CH01_75013057	SL2.50CH01	75013057	0.077	0.9597	0.0403	0	0	0	0
203	SSL2.50CH01_75093616	SL2.50CH01	75093616	0.15	0.91834	0.08166	0	0	0	0
204	SSL2.50CH01_75142320	SL2.50CH01	75142320	0.113	0.9397	0.0603	0	0	0	0
205	SSL2.50CH01_75179356	SL2.50CH01	75179356	0.07	0.96348	0.03652	0	0	0	0
206	SSL2.50CH01_75211091	SL2.50CH01	75211091	0.152	0.91709	0.08291	0	0	0	0
207	SSL2.50CH01_75367035	SL2.50CH01	75367035	0.162	0.91103	0.08897	0	0	0	0
208	SSL2.50CH01_75405193	SL2.50CH01	75405193	0.12	0.93561	0.06439	0	0	0	0
209	SSL2.50CH01_75429204	SL2.50CH01	75429204	0.169	0.90704	0.09296	0	0	0	0
210	SSL2.50CH01_75509528	SL2.50CH01	75509528	0.072	0.96241	0.03759	0	0	0	0
211	SSL2.50CH01_75621442	SL2.50CH01	75621442	0.104	0.94472	0.05528	0	0	0	0
212	SSL2.50CH01_75714403	SL2.50CH01	75714403	0.281	0.83123	0.16877	0	0	0	0
213	SSL2.50CH01_75868254	SL2.50CH01	75868254	0.159	0.91288	0.08712	0	0	0	0
214	SSL2.50CH01_76228657	SL2.50CH01	76228657	0.131	0.92929	0.07071	0	0	0	0
215	SSL2.50CH01_76264316	SL2.50CH01	76264316	0.165	0.90909	0.09091	0	0	0	0
216	SSL2.50CH01_76352503	SL2.50CH01	76352503	0.063	0.96734	0.03266	0	0	0	0
217	SSL2.50CH01_76442563	SL2.50CH01	76442563	0.167	0.90829	0.09171	0	0	0	0
218	SSL2.50CH01_76474045	SL2.50CH01	76474045	0.144	0.92191	0.07809	0	0	0	0
219	SSL2.50CH01_76652911	SL2.50CH01	76652911	0.16	0.91206	0.08794	0	0	0	0
220	SSL2.50CH01_76970122	SL2.50CH01	76970122	0.113	0.9397	0.0603	0	0	0	0
221	SSL2.50CH01_77031042	SL2.50CH01	77031042	0.101	0.9467	0.0533	0	0	0	0
222	SSL2.50CH01_77051925	SL2.50CH01	77051925	0.034	0.98246	0.01754	0	0	0	0
223	SSL2.50CH01_77067248	SL2.50CH01	77067248	0.083	0.95641	0.04359	0	0	0	0
224	SSL2.50CH01_77083470	SL2.50CH01	77083470	0.166	0.90852	0.09148	0	0	0	0
225	SSL2.50CH01_77115304	SL2.50CH01	77115304	0.143	0.92231	0.07769	0	0	0	0
226	SSL2.50CH01_77196243	SL2.50CH01	77196243	0.092	0.9519	0.0481	0	0	0	0
227	SSL2.50CH01_77235144	SL2.50CH01	77235144	0.03	0.98485	0.01515	0	0	0	0
228	SSL2.50CH01_77265410	SL2.50CH01	77265410	0.085	0.9557	0.0443	0	0	0	0
229	SSL2.50CH01_77315819	SL2.50CH01	77315819	0.133	0.92821	0.07179	0	0	0	0
230	SSL2.50CH01_77425186	SL2.50CH01	77425186	0.198	0.88889	0.11111	0	0	0	0
231	SSL2.50CH01_77549840	SL2.50CH01	77549840	0.137	0.92602	0.07398	0	0	0	0
232	SSL2.50CH01_77580484	SL2.50CH01	77580484	0.146	0.92085	0.07915	0	0	0	0
233	SSL2.50CH01_77622540	SL2.50CH01	77622540	0.083	0.95641	0.04359	0	0	0	0
234	SSL2.50CH01_77668908	SL2.50CH01	77668908	0.173	0.90428	0.09572	0	0	0	0
235	SSL2.50CH01_77707542	SL2.50CH01	77707542	0.166	0.90852	0.09148	0	0	0	0
236	SSL2.50CH01_77742507	SL2.50CH01	77742507	0.12	0.93593	0.06407	0	0	0	0
237	SSL2.50CH01_77763583	SL2.50CH01	77763583	0.121	0.93544	0.06456	0	0	0	0
238	SSL2.50CH01_78151973	SL2.50CH01	78151973	0.137	0.92588	0.07412	0	0	0	0
239	SSL2.50CH01_78277286	SL2.50CH01	78277286	0.054	0.97236	0.02764	0	0	0	0
240	SSL2.50CH01_78297104	SL2.50CH01	78297104	0.044	0.97739	0.02261	0	0	0	0
241	SSL2.50CH01_78404011	SL2.50CH01	78404011	0.141	0.92356	0.07644	0	0	0	0
242	SSL2.50CH01_78496814	SL2.50CH01	78496814	0.499	0.51637	0.48363	0	0	0	0
243	SSL2.50CH01_78511975	SL2.50CH01	78511975	0.135	0.92695	0.07305	0	0	0	0
244	SSL2.50CH01_78527982	SL2.50CH01	78527982	0.15	0.91855	0.08145	0	0	0	0
245	SSL2.50CH01_78543728	SL2.50CH01	78543728	0.112	0.94066	0.05934	0	0	0	0
246	SSL2.50CH01_78574296	SL2.50CH01	78574296	0.108	0.94275	0.05216	0.00509	0	0	0
247	SSL2.50CH01_78589318	SL2.50CH01	78589318	0.124	0.93342	0.06658	0	0	0	0
248	SSL2.50CH01_78675305	SL2.50CH01	78675305	0.079	0.95865	0.04135	0	0	0	0
249	SSL2.50CH01_78780594	SL2.50CH01	78780594	0.423	0.69571	0.30429	0	0	0	0
250	SSL2.50CH01_78896497	SL2.50CH01	78896497	0.077	0.9599	0.0401	0	0	0	0
251	SSL2.50CH01_78912203	SL2.50CH01	78912203	0.082	0.95729	0.04271	0	0	0	0
252	SSL2.50CH01_78928328	SL2.50CH01	78928328	0.044	0.97733	0.02267	0	0	0	0
253	SSL2.50CH01_78944108	SL2.50CH01	78944108	0.128	0.93108	0.06892	0	0	0	0
254	SSL2.50CH01_78993605	SL2.50CH01	78993605	0.137	0.92607	0.07393	0	0	0	0
255	SSL2.50CH01_79130486	SL2.50CH01	79130486	0.104	0.94472	0.05528	0	0	0	0
256	SSL2.50CH01_79162002	SL2.50CH01	79162002	0.284	0.82832	0.17168	0	0	0	0
257	SSL2.50CH01_79244754	SL2.50CH01	79244754	0.311	0.8073	0.1927	0	0	0	0
258	SSL2.50CH01_79295213	SL2.50CH01	79295213	0.136	0.92658	0.07342	0	0	0	0
259	SSL2.50CH01_79423022	SL2.50CH01	79423022	0.158	0.91332	0.08668	0	0	0	0
260	SSL2.50CH01_79461067	SL2.50CH01	79461067	0.16	0.91206	0.08794	0	0	0	0
261	SSL2.50CH01_79626101	SL2.50CH01	79626101	0.129	0.9309	0.0691	0	0	0	0
262	SSL2.50CH01_79647837	SL2.50CH01	79647837	0.157	0.91436	0.08438	0.00126	0	0	0
263	SSL2.50CH01_79685122	SL2.50CH01	79685122	0.335	0.78682	0.21318	0	0	0	0
264	SSL2.50CH01_79722157	SL2.50CH01	79722157	0.027	0.98618	0.01382	0	0	0	0
265	SSL2.50CH01_79963099	SL2.50CH01	79963099	0.163	0.91058	0.08942	0	0	0	0
266	SSL2.50CH01_79978192	SL2.50CH01	79978192	0.087	0.95466	0.04534	0	0	0	0
267	SSL2.50CH01_80065791	SL2.50CH01	80065791	0.014	0.99286	0.00714	0	0	0	0
268	SSL2.50CH01_80124712	SL2.50CH01	80124712	0.222	0.8728	0.1272	0	0	0	0
269	SSL2.50CH01_80141029	SL2.50CH01	80141029	0.336	0.78643	0.21357	0	0	0	0
270	SSL2.50CH01_80262290	SL2.50CH01	80262290	0.158	0.91353	0.08647	0	0	0	0
271	SSL2.50CH01_80305144	SL2.50CH01	80305144	0.163	0.91058	0.08942	0	0	0	0
272	SSL2.50CH01_80352500	SL2.50CH01	80352500	0.02	0.98995	0.01005	0	0	0	0
273	SSL2.50CH01_80444170	SL2.50CH01	80444170	0.133	0.92821	0.07179	0	0	0	0
274	SSL2.50CH01_80495816	SL2.50CH01	80495816	0.14	0.92424	0.07576	0	0	0	0
275	SSL2.50CH01_80527551	SL2.50CH01	80527551	0.162	0.91103	0.08897	0	0	0	0
276	SSL2.50CH01_80542671	SL2.50CH01	80542671	0.15	0.91814	0.08186	0	0	0	0
277	SSL2.50CH01_80595077	SL2.50CH01	80595077	0.042	0.97864	0.02136	0	0	0	0
278	SSL2.50CH01_80674428	SL2.50CH01	80674428	0.158	0.91332	0.08668	0	0	0	0
279	SSL2.50CH01_80765493	SL2.50CH01	80765493	0.158	0.91353	0.08647	0	0	0	0
280	SSL2.50CH01_80814796	SL2.50CH01	80814796	0.084	0.95619	0.04381	0	0	0	0
281	SSL2.50CH01_80830395	SL2.50CH01	80830395	0.123	0.93411	0.06589	0	0	0	0
282	SSL2.50CH01_81113581	SL2.50CH01	81113581	0.073	0.96212	0.03788	0	0	0	0
283	SSL2.50CH01_81170342	SL2.50CH01	81170342	0.035	0.98232	0.01768	0	0	0	0
284	SSL2.50CH01_81215903	SL2.50CH01	81215903	0.154	0.91604	0.08271	0.00125	0	0	0
285	SSL2.50CH01_81260561	SL2.50CH01	81260561	0.102	0.94584	0.05416	0	0	0	0
286	SSL2.50CH01_81618749	SL2.50CH01	81618749	0.037	0.98116	0.01884	0	0	0	0
287	SSL2.50CH01_81643656	SL2.50CH01	81643656	0.105	0.94444	0.05556	0	0	0	0
288	SSL2.50CH01_81676788	SL2.50CH01	81676788	0.044	0.97733	0.02267	0	0	0	0
289	SSL2.50CH01_81692528	SL2.50CH01	81692528	0.092	0.95153	0.04847	0	0	0	0
290	SSL2.50CH01_81707711	SL2.50CH01	81707711	0.091	0.95226	0.04774	0	0	0	0
291	SSL2.50CH01_81764111	SL2.50CH01	81764111	0.098	0.94836	0.05164	0	0	0	0
292	SSL2.50CH01_81779415	SL2.50CH01	81779415	0.102	0.94598	0.05402	0	0	0	0
293	SSL2.50CH01_81812467	SL2.50CH01	81812467	0.079	0.95865	0.04135	0	0	0	0
294	SSL2.50CH01_81827498	SL2.50CH01	81827498	0.165	0.90955	0.09045	0	0	0	0
295	SSL2.50CH01_81867167	SL2.50CH01	81867167	0.089	0.9534	0.0466	0	0	0	0
296	SSL2.50CH01_81887087	SL2.50CH01	81887087	0.182	0.8985	0.1015	0	0	0	0
297	SSL2.50CH01_81942138	SL2.50CH01	81942138	0.07	0.96348	0.03652	0	0	0	0
298	SSL2.50CH01_81965694	SL2.50CH01	81965694	0.15	0.91855	0.08145	0	0	0	0
299	SSL2.50CH01_82011441	SL2.50CH01	82011441	0.067	0.96538	0.03462	0	0	0	0
300	SSL2.50CH01_82192968	SL2.50CH01	82192968	0.013	0.9937	0.0063	0	0	0	0
301	SSL2.50CH01_82208434	SL2.50CH01	82208434	0.098	0.94859	0.05141	0	0	0	0
302	SSL2.50CH01_82254217	SL2.50CH01	82254217	0.146	0.92085	0.07915	0	0	0	0
303	SSL2.50CH01_82326112	SL2.50CH01	82326112	0.068	0.96456	0.03544	0	0	0	0
304	SSL2.50CH01_82441231	SL2.50CH01	82441231	0.122	0.93577	0.05164	0.01259	0	0	0
305	SSL2.50CH01_82457831	SL2.50CH01	82457831	0.16	0.91228	0.08772	0	0	0	0
306	SSL2.50CH01_82488006	SL2.50CH01	82488006	0.125	0.93274	0.06726	0	0	0	0
307	SSL2.50CH01_82507235	SL2.50CH01	82507235	0.463	0.63693	0.36307	0	0	0	0
308	SSL2.50CH01_82625492	SL2.50CH01	82625492	0.063	0.96734	0.03266	0	0	0	0
309	SSL2.50CH01_82655950	SL2.50CH01	82655950	0.15	0.91834	0.08166	0	0	0	0
310	SSL2.50CH01_82705218	SL2.50CH01	82705218	0.116	0.9383	0.0617	0	0	0	0
311	SSL2.50CH01_82720768	SL2.50CH01	82720768	0.435	0.68056	0.31944	0	0	0	0
312	SSL2.50CH01_82792674	SL2.50CH01	82792674	0.486	0.58291	0.41709	0	0	0	0
313	SSL2.50CH01_82901585	SL2.50CH01	82901585	0.027	0.98618	0.01382	0	0	0	0
314	SSL2.50CH01_83065167	SL2.50CH01	83065167	0.199	0.88791	0.11209	0	0	0	0
315	SSL2.50CH01_83081190	SL2.50CH01	83081190	0.148	0.9194	0.0806	0	0	0	0
316	SSL2.50CH01_83115459	SL2.50CH01	83115459	0.052	0.97328	0.02672	0	0	0	0
317	SSL2.50CH01_83147679	SL2.50CH01	83147679	0.119	0.93655	0.06345	0	0	0	0
318	SSL2.50CH01_83163068	SL2.50CH01	83163068	0.057	0.97089	0.02911	0	0	0	0
319	SSL2.50CH01_83284947	SL2.50CH01	83284947	0.214	0.87783	0.12217	0	0	0	0
320	SSL2.50CH01_83331787	SL2.50CH01	83331787	0.137	0.92588	0.07412	0	0	0	0
321	SSL2.50CH01_83367718	SL2.50CH01	83367718	0.156	0.91479	0.08521	0	0	0	0
322	SSL2.50CH01_83406013	SL2.50CH01	83406013	0.044	0.97744	0.02256	0	0	0	0
323	SSL2.50CH01_83515085	SL2.50CH01	83515085	0.165	0.90955	0.09045	0	0	0	0
324	SSL2.50CH01_83573176	SL2.50CH01	83573176	0.023	0.98849	0.01151	0	0	0	0
325	SSL2.50CH01_83654167	SL2.50CH01	83654167	0.163	0.91071	0.08929	0	0	0	0
326	SSL2.50CH01_83711152	SL2.50CH01	83711152	0.245	0.85732	0.14268	0	0	0	0
327	SSL2.50CH01_83890807	SL2.50CH01	83890807	0.158	0.91332	0.08668	0	0	0	0
328	SSL2.50CH01_83914392	SL2.50CH01	83914392	0.015	0.99248	0.00752	0	0	0	0
329	SSL2.50CH01_83961919	SL2.50CH01	83961919	0.12	0.93561	0.06439	0	0	0	0
330	SSL2.50CH01_83998669	SL2.50CH01	83998669	0.04	0.9798	0.0202	0	0	0	0
331	SSL2.50CH01_84121136	SL2.50CH01	84121136	0.148	0.9198	0.0802	0	0	0	0
332	SSL2.50CH01_84137553	SL2.50CH01	84137553	0.154	0.91583	0.08417	0	0	0	0
333	SSL2.50CH01_84153311	SL2.50CH01	84153311	0.129	0.93073	0.06927	0	0	0	0
334	SSL2.50CH01_84168411	SL2.50CH01	84168411	0.146	0.92085	0.07915	0	0	0	0
335	SSL2.50CH01_84198504	SL2.50CH01	84198504	0.163	0.91058	0.08942	0	0	0	0
336	SSL2.50CH01_84275203	SL2.50CH01	84275203	0.15	0.91834	0.08166	0	0	0	0
337	SSL2.50CH01_84292740	SL2.50CH01	84292740	0.11	0.94148	0.05852	0	0	0	0
338	SSL2.50CH01_84435378	SL2.50CH01	84435378	0.142	0.92298	0.07702	0	0	0	0
339	SSL2.50CH01_84450448	SL2.50CH01	84450448	0.158	0.91332	0.08668	0	0	0	0
340	SSL2.50CH01_84468487	SL2.50CH01	84468487	0.044	0.97727	0.02273	0	0	0	0
341	SSL2.50CH01_84561615	SL2.50CH01	84561615	0.114	0.93935	0.06065	0	0	0	0
342	SSL2.50CH01_84614279	SL2.50CH01	84614279	0.16	0.91421	0.06434	0.02145	0	0	0
343	SSL2.50CH01_84632273	SL2.50CH01	84632273	0.126	0.93233	0.06767	0	0	0	0
344	SSL2.50CH01_84717708	SL2.50CH01	84717708	0.1	0.94697	0.05303	0	0	0	0
345	SSL2.50CH01_84733098	SL2.50CH01	84733098	0.118	0.93703	0.06297	0	0	0	0
346	SSL2.50CH01_84825376	SL2.50CH01	84825376	0.107	0.94347	0.05653	0	0	0	0
347	SSL2.50CH01_84993299	SL2.50CH01	84993299	0.166	0.90852	0.09148	0	0	0	0
348	SSL2.50CH01_85032911	SL2.50CH01	85032911	0.022	0.98869	0.01131	0	0	0	0
349	SSL2.50CH01_85115211	SL2.50CH01	85115211	0.044	0.97733	0.02267	0	0	0	0
350	SSL2.50CH01_85131333	SL2.50CH01	85131333	0.162	0.91184	0.0806	0.00756	0	0	0
351	SSL2.50CH01_85221482	SL2.50CH01	85221482	0.26	0.84673	0.15327	0	0	0	0
352	SSL2.50CH01_85314156	SL2.50CH01	85314156	0.042	0.97864	0.02136	0	0	0	0
353	SSL2.50CH01_85351601	SL2.50CH01	85351601	0.477	0.60705	0.39295	0	0	0	0
354	SSL2.50CH01_85381871	SL2.50CH01	85381871	0.139	0.92481	0.07519	0	0	0	0
355	SSL2.50CH01_85397613	SL2.50CH01	85397613	0.125	0.93299	0.06701	0	0	0	0
356	SSL2.50CH01_85442809	SL2.50CH01	85442809	0.022	0.98872	0.01128	0	0	0	0
357	SSL2.50CH01_85466357	SL2.50CH01	85466357	0.142	0.92337	0.07663	0	0	0	0
358	SSL2.50CH01_85497427	SL2.50CH01	85497427	0.11	0.94133	0.05867	0	0	0	0
359	SSL2.50CH01_85619013	SL2.50CH01	85619013	0.175	0.90302	0.09698	0	0	0	0
360	SSL2.50CH01_85703749	SL2.50CH01	85703749	0.071	0.96348	0.03149	0.00504	0	0	0
361	SSL2.50CH01_85742429	SL2.50CH01	85742429	0.154	0.91583	0.08417	0	0	0	0
362	SSL2.50CH01_85857592	SL2.50CH01	85857592	0.159	0.9131	0.0869	0	0	0	0
363	SSL2.50CH01_85914674	SL2.50CH01	85914674	0.13	0.93038	0.06962	0	0	0	0
364	SSL2.50CH01_85929839	SL2.50CH01	85929839	0.006	0.99692	0.00308	0	0	0	0
365	SSL2.50CH01_85962208	SL2.50CH01	85962208	0.16	0.91206	0.08794	0	0	0	0
366	SSL2.50CH01_86025637	SL2.50CH01	86025637	0.158	0.91353	0.08647	0	0	0	0
367	SSL2.50CH01_86041637	SL2.50CH01	86041637	0.066	0.96608	0.03392	0	0	0	0
368	SSL2.50CH01_86093661	SL2.50CH01	86093661	0.12	0.93577	0.06423	0	0	0	0
369	SSL2.50CH01_86108850	SL2.50CH01	86108850	0.141	0.92356	0.07644	0	0	0	0
370	SSL2.50CH01_86125100	SL2.50CH01	86125100	0.133	0.92839	0.07161	0	0	0	0
371	SSL2.50CH01_86182719	SL2.50CH01	86182719	0.163	0.91067	0.08933	0	0	0	0
372	SSL2.50CH01_86288981	SL2.50CH01	86288981	0.096	0.94937	0.05063	0	0	0	0
373	SSL2.50CH01_86315432	SL2.50CH01	86315432	0.102	0.94615	0.05385	0	0	0	0
374	SSL2.50CH01_86352744	SL2.50CH01	86352744	0.16	0.91206	0.08794	0	0	0	0
375	SSL2.50CH01_86385036	SL2.50CH01	86385036	0.162	0.9108	0.0892	0	0	0	0
376	SSL2.50CH01_86453892	SL2.50CH01	86453892	0.106	0.94361	0.05639	0	0	0	0
377	SSL2.50CH01_86469892	SL2.50CH01	86469892	0.348	0.77582	0.22418	0	0	0	0
378	SSL2.50CH01_86547048	SL2.50CH01	86547048	0.171	0.90578	0.09422	0	0	0	0
379	SSL2.50CH01_86599070	SL2.50CH01	86599070	0.479	0.60202	0.39798	0	0	0	0
380	SSL2.50CH01_86631946	SL2.50CH01	86631946	0.054	0.97236	0.02764	0	0	0	0
381	SSL2.50CH01_86650828	SL2.50CH01	86650828	0.158	0.91353	0.08647	0	0	0	0
382	SSL2.50CH01_86742043	SL2.50CH01	86742043	0.344	0.77892	0.22108	0	0	0	0
383	SSL2.50CH01_86757144	SL2.50CH01	86757144	0.03	0.98489	0.01511	0	0	0	0
384	SSL2.50CH01_86772474	SL2.50CH01	86772474	0.162	0.9108	0.0892	0	0	0	0
385	SSL2.50CH01_86811458	SL2.50CH01	86811458	0.165	0.90955	0.09045	0	0	0	0
386	SSL2.50CH01_86856085	SL2.50CH01	86856085	0.161	0.91184	0.08816	0	0	0	0
387	SSL2.50CH01_86871242	SL2.50CH01	86871242	0.047	0.97613	0.02261	0.00126	0	0	0
388	SSL2.50CH01_86917784	SL2.50CH01	86917784	0.082	0.95696	0.04304	0	0	0	0
389	SSL2.50CH01_86934006	SL2.50CH01	86934006	0.175	0.90327	0.09673	0	0	0	0
390	SSL2.50CH01_86983365	SL2.50CH01	86983365	0.212	0.8794	0.1206	0	0	0	0
391	SSL2.50CH01_87113346	SL2.50CH01	87113346	0.191	0.89322	0.10678	0	0	0	0
392	SSL2.50CH01_87128474	SL2.50CH01	87128474	0.042	0.97854	0.02146	0	0	0	0
393	SSL2.50CH01_87161537	SL2.50CH01	87161537	0.15	0.91855	0.08145	0	0	0	0
394	SSL2.50CH01_87196209	SL2.50CH01	87196209	0.095	0.94975	0.05025	0	0	0	0
395	SSL2.50CH01_87319964	SL2.50CH01	87319964	0.068	0.96474	0.03526	0	0	0	0
396	SSL2.50CH01_87361874	SL2.50CH01	87361874	0.03	0.98496	0.01504	0	0	0	0
397	SSL2.50CH01_87380415	SL2.50CH01	87380415	0.059	0.96985	0.02638	0.00377	0	0	0
398	SSL2.50CH01_87467938	SL2.50CH01	87467938	0.133	0.92839	0.07161	0	0	0	0
399	SSL2.50CH01_87485244	SL2.50CH01	87485244	0.165	0.90955	0.09045	0	0	0	0
400	SSL2.50CH01_87523414	SL2.50CH01	87523414	0.116	0.93813	0.06187	0	0	0	0
401	SSL2.50CH01_87561375	SL2.50CH01	87561375	0.125	0.93316	0.06684	0	0	0	0
402	SSL2.50CH01_87612173	SL2.50CH01	87612173	0.054	0.97243	0.02757	0	0	0	0
403	SSL2.50CH01_87692713	SL2.50CH01	87692713	0.089	0.9534	0.0466	0	0	0	0
404	SSL2.50CH01_87790722	SL2.50CH01	87790722	0.091	0.95226	0.04774	0	0	0	0
405	SSL2.50CH01_87832786	SL2.50CH01	87832786	0.04	0.97975	0.02025	0	0	0	0
406	SSL2.50CH01_87866374	SL2.50CH01	87866374	0.158	0.91353	0.08647	0	0	0	0
407	SSL2.50CH01_87912427	SL2.50CH01	87912427	0.157	0.91436	0.08564	0	0	0	0
408	SSL2.50CH01_87969126	SL2.50CH01	87969126	0.144	0.92211	0.07789	0	0	0	0
409	SSL2.50CH01_88017968	SL2.50CH01	88017968	0.167	0.90806	0.09194	0	0	0	0
410	SSL2.50CH01_88049077	SL2.50CH01	88049077	0.096	0.94935	0.04805	0.0026	0	0	0
411	SSL2.50CH01_88064809	SL2.50CH01	88064809	0.047	0.97613	0.02387	0	0	0	0
412	SSL2.50CH01_88108007	SL2.50CH01	88108007	0.14	0.92424	0.07576	0	0	0	0
413	SSL2.50CH01_88174740	SL2.50CH01	88174740	0.084	0.95614	0.04386	0	0	0	0
414	SSL2.50CH01_88196800	SL2.50CH01	88196800	0.152	0.91688	0.08312	0	0	0	0
415	SSL2.50CH01_88212997	SL2.50CH01	88212997	0.183	0.89824	0.10176	0	0	0	0
416	SSL2.50CH01_88244822	SL2.50CH01	88244822	0.077	0.9597	0.0403	0	0	0	0
417	SSL2.50CH01_88292950	SL2.50CH01	88292950	0.165	0.90932	0.09068	0	0	0	0
418	SSL2.50CH01_88307961	SL2.50CH01	88307961	0.139	0.92481	0.07519	0	0	0	0
419	SSL2.50CH01_88338298	SL2.50CH01	88338298	0.049	0.97475	0.02525	0	0	0	0
420	SSL2.50CH01_88404538	SL2.50CH01	88404538	0.096	0.94962	0.05038	0	0	0	0
421	SSL2.50CH01_88436271	SL2.50CH01	88436271	0.047	0.97589	0.02411	0	0	0	0
422	SSL2.50CH01_88453159	SL2.50CH01	88453159	0.181	0.8995	0.1005	0	0	0	0
423	SSL2.50CH01_88516249	SL2.50CH01	88516249	0.15	0.91834	0.08166	0	0	0	0
424	SSL2.50CH01_88559036	SL2.50CH01	88559036	0.309	0.80879	0.19121	0	0	0	0
425	SSL2.50CH01_88575837	SL2.50CH01	88575837	0.152	0.91729	0.08271	0	0	0	0
426	SSL2.50CH01_88593347	SL2.50CH01	88593347	0.089	0.95328	0.04672	0	0	0	0
427	SSL2.50CH01_88626843	SL2.50CH01	88626843	0.013	0.9937	0.0063	0	0	0	0
428	SSL2.50CH01_88658729	SL2.50CH01	88658729	0.04	0.97975	0.02025	0	0	0	0
429	SSL2.50CH01_88677408	SL2.50CH01	88677408	0.025	0.98744	0.01256	0	0	0	0
430	SSL2.50CH01_88724797	SL2.50CH01	88724797	0.167	0.90806	0.09194	0	0	0	0
431	SSL2.50CH01_88760871	SL2.50CH01	88760871	0.205	0.88413	0.11587	0	0	0	0
432	SSL2.50CH01_88781854	SL2.50CH01	88781854	0.083	0.95674	0.04326	0	0	0	0
433	SSL2.50CH01_88797918	SL2.50CH01	88797918	0.084	0.95614	0.04386	0	0	0	0
434	SSL2.50CH01_88904892	SL2.50CH01	88904892	0.128	0.93112	0.06888	0	0	0	0
435	SSL2.50CH01_88937625	SL2.50CH01	88937625	0.397	0.72739	0.27261	0	0	0	0
436	SSL2.50CH01_88978614	SL2.50CH01	88978614	0.135	0.9273	0.0727	0	0	0	0
437	SSL2.50CH01_88993636	SL2.50CH01	88993636	0.02	0.99	0.01	0	0	0	0
438	SSL2.50CH01_89025143	SL2.50CH01	89025143	0.138	0.92532	0.07468	0	0	0	0
439	SSL2.50CH01_89040627	SL2.50CH01	89040627	0.395	0.72864	0.27136	0	0	0	0
440	SSL2.50CH01_89108103	SL2.50CH01	89108103	0.168	0.90727	0.09273	0	0	0	0
441	SSL2.50CH01_89277185	SL2.50CH01	89277185	0.114	0.93956	0.06044	0	0	0	0
442	SSL2.50CH01_89359893	SL2.50CH01	89359893	0.137	0.92607	0.07393	0	0	0	0
443	SSL2.50CH01_89430660	SL2.50CH01	89430660	0.022	0.98864	0.01136	0	0	0	0
444	SSL2.50CH01_89510358	SL2.50CH01	89510358	0.174	0.90351	0.09649	0	0	0	0
445	SSL2.50CH01_89542124	SL2.50CH01	89542124	0.089	0.95328	0.04672	0	0	0	0
446	SSL2.50CH01_89653590	SL2.50CH01	89653590	0.094	0.95088	0.04408	0.00504	0	0	0
447	SSL2.50CH01_89668618	SL2.50CH01	89668618	0.148	0.9196	0.0804	0	0	0	0
448	SSL2.50CH01_89805464	SL2.50CH01	89805464	0.165	0.90955	0.09045	0	0	0	0
449	SSL2.50CH01_89984672	SL2.50CH01	89984672	0.446	0.6644	0.3356	0	0	0	0
450	SSL2.50CH01_90199749	SL2.50CH01	90199749	0.013	0.99367	0.00633	0	0	0	0
451	SSL2.50CH01_90225397	SL2.50CH01	90225397	0.152	0.91688	0.08312	0	0	0	0
452	SSL2.50CH01_90281358	SL2.50CH01	90281358	0.168	0.90727	0.09273	0	0	0	0
453	SSL2.50CH01_90328036	SL2.50CH01	90328036	0.176	0.90278	0.09722	0	0	0	0
454	SSL2.50CH01_90343261	SL2.50CH01	90343261	0.037	0.98111	0.01889	0	0	0	0
455	SSL2.50CH01_90366645	SL2.50CH01	90366645	0.15	0.91855	0.08145	0	0	0	0
456	SSL2.50CH01_90428527	SL2.50CH01	90428527	0.068	0.96465	0.03409	0.00126	0	0	0
457	SSL2.50CH01_90444493	SL2.50CH01	90444493	0.185	0.89698	0.10302	0	0	0	0
458	SSL2.50CH01_90460394	SL2.50CH01	90460394	0.177	0.90201	0.09799	0	0	0	0
459	SSL2.50CH01_90475629	SL2.50CH01	90475629	0.166	0.90852	0.09148	0	0	0	0
460	SSL2.50CH01_90490993	SL2.50CH01	90490993	0.245	0.85696	0.14304	0	0	0	0
461	SSL2.50CH01_90709122	SL2.50CH01	90709122	0.073	0.96222	0.03778	0	0	0	0
462	SSL2.50CH01_90724282	SL2.50CH01	90724282	0.169	0.90657	0.09343	0	0	0	0
463	SSL2.50CH01_90828066	SL2.50CH01	90828066	0.086	0.95477	0.04523	0	0	0	0
464	SSL2.50CH01_90987755	SL2.50CH01	90987755	0.12	0.93577	0.06423	0	0	0	0
465	SSL2.50CH01_91091264	SL2.50CH01	91091264	0.018	0.991	0.009	0	0	0	0
466	SSL2.50CH01_91124098	SL2.50CH01	91124098	0.177	0.90201	0.09799	0	0	0	0
467	SSL2.50CH01_91256237	SL2.50CH01	91256237	0.166	0.90863	0.09137	0	0	0	0
468	SSL2.50CH01_91271723	SL2.50CH01	91271723	0.051	0.97362	0.02638	0	0	0	0
469	SSL2.50CH01_91336593	SL2.50CH01	91336593	0.296	0.81944	0.18056	0	0	0	0
470	SSL2.50CH01_91369657	SL2.50CH01	91369657	0.186	0.89646	0.10354	0	0	0	0
471	SSL2.50CH01_91639832	SL2.50CH01	91639832	0.059	0.9697	0.0303	0	0	0	0
472	SSL2.50CH01_91656528	SL2.50CH01	91656528	0.02	0.9899	0.0101	0	0	0	0
473	SSL2.50CH01_91672901	SL2.50CH01	91672901	0.175	0.90302	0.09698	0	0	0	0
474	SSL2.50CH01_91689429	SL2.50CH01	91689429	0.183	0.89824	0.10176	0	0	0	0
475	SSL2.50CH01_91712707	SL2.50CH01	91712707	0.146	0.92045	0.07955	0	0	0	0
476	SSL2.50CH01_91751702	SL2.50CH01	91751702	0.176	0.90226	0.09774	0	0	0	0
477	SSL2.50CH01_91784075	SL2.50CH01	91784075	0.166	0.90852	0.09148	0	0	0	0
478	SSL2.50CH01_91816773	SL2.50CH01	91816773	0.017	0.99121	0.00879	0	0	0	0
479	SSL2.50CH01_91866229	SL2.50CH01	91866229	0.094	0.95063	0.04937	0	0	0	0
480	SSL2.50CH01_91881282	SL2.50CH01	91881282	0.171	0.90554	0.09446	0	0	0	0
481	SSL2.50CH01_92005578	SL2.50CH01	92005578	0.139	0.92494	0.07506	0	0	0	0
482	SSL2.50CH01_92068496	SL2.50CH01	92068496	0.11	0.94236	0.03759	0.02005	0	0	0
483	SSL2.50CH01_92087698	SL2.50CH01	92087698	0.12	0.93577	0.06423	0	0	0	0
484	SSL2.50CH01_92137113	SL2.50CH01	92137113	0.1	0.9471	0.0529	0	0	0	0
485	SSL2.50CH01_92153051	SL2.50CH01	92153051	0.123	0.93418	0.06582	0	0	0	0
486	SSL2.50CH01_92198479	SL2.50CH01	92198479	0.066	0.96591	0.03409	0	0	0	0
487	SSL2.50CH01_92215718	SL2.50CH01	92215718	0.136	0.92674	0.07326	0	0	0	0
488	SSL2.50CH01_92231358	SL2.50CH01	92231358	0.171	0.90578	0.09422	0	0	0	0
489	SSL2.50CH01_92246549	SL2.50CH01	92246549	0.146	0.92085	0.07789	0.00126	0	0	0
490	SSL2.50CH01_92263310	SL2.50CH01	92263310	0.116	0.93814	0.06186	0	0	0	0
491	SSL2.50CH01_92391217	SL2.50CH01	92391217	0.056	0.97111	0.02889	0	0	0	0
492	SSL2.50CH01_92423803	SL2.50CH01	92423803	0.169	0.9068	0.0932	0	0	0	0
493	SSL2.50CH01_92443407	SL2.50CH01	92443407	0.15	0.91814	0.08186	0	0	0	0
494	SSL2.50CH01_92475711	SL2.50CH01	92475711	0.105	0.94458	0.05542	0	0	0	0
495	SSL2.50CH01_92507842	SL2.50CH01	92507842	0.1	0.94724	0.05276	0	0	0	0
496	SSL2.50CH01_92541268	SL2.50CH01	92541268	0.188	0.89474	0.10526	0	0	0	0
497	SSL2.50CH01_92556701	SL2.50CH01	92556701	0.181	0.89924	0.10076	0	0	0	0
498	SSL2.50CH01_92686689	SL2.50CH01	92686689	0.096	0.94949	0.05051	0	0	0	0
499	SSL2.50CH01_92733240	SL2.50CH01	92733240	0.124	0.93384	0.06616	0	0	0	0
500	SSL2.50CH01_92780530	SL2.50CH01	92780530	0.116	0.93844	0.06156	0	0	0	0
501	SSL2.50CH01_92973822	SL2.50CH01	92973822	0.027	0.98615	0.01385	0	0	0	0
502	SSL2.50CH01_93049898	SL2.50CH01	93049898	0.071	0.96338	0.03662	0	0	0	0
503	SSL2.50CH01_93116708	SL2.50CH01	93116708	0.044	0.97733	0.02267	0	0	0	0
504	SSL2.50CH01_93131732	SL2.50CH01	93131732	0.173	0.90452	0.09548	0	0	0	0
505	SSL2.50CH01_93148094	SL2.50CH01	93148094	0.126	0.93233	0.06767	0	0	0	0
506	SSL2.50CH01_93179320	SL2.50CH01	93179320	0.152	0.91709	0.08291	0	0	0	0
507	SSL2.50CH01_93194332	SL2.50CH01	93194332	0.178	0.901	0.099	0	0	0	0
508	SSL2.50CH01_93243996	SL2.50CH01	93243996	0.125	0.93325	0.06675	0	0	0	0
509	SSL2.50CH01_93424539	SL2.50CH01	93424539	0.177	0.90176	0.09824	0	0	0	0
510	SSL2.50CH01_93440998	SL2.50CH01	93440998	0.064	0.96692	0.03308	0	0	0	0
511	SSL2.50CH01_93472460	SL2.50CH01	93472460	0.179	0.90075	0.09925	0	0	0	0
512	SSL2.50CH01_93508939	SL2.50CH01	93508939	0.113	0.94066	0.04167	0.01768	0	0	0
513	SSL2.50CH01_93527112	SL2.50CH01	93527112	0.172	0.90476	0.09524	0	0	0	0
514	SSL2.50CH01_93573396	SL2.50CH01	93573396	0.123	0.93445	0.05913	0.00643	0	0	0
515	SSL2.50CH01_93628128	SL2.50CH01	93628128	0.059	0.96977	0.03023	0	0	0	0
516	SSL2.50CH01_93658542	SL2.50CH01	93658542	0.02	0.98995	0.01005	0	0	0	0
517	SSL2.50CH01_93713211	SL2.50CH01	93713211	0.03	0.98496	0.01504	0	0	0	0
518	SSL2.50CH01_93767566	SL2.50CH01	93767566	0.177	0.90201	0.09799	0	0	0	0
519	SSL2.50CH01_93788692	SL2.50CH01	93788692	0.032	0.98367	0.01633	0	0	0	0
520	SSL2.50CH01_93819335	SL2.50CH01	93819335	0.126	0.93233	0.06767	0	0	0	0
521	SSL2.50CH01_93891040	SL2.50CH01	93891040	0.497	0.53769	0.46231	0	0	0	0
522	SSL2.50CH01_93912704	SL2.50CH01	93912704	0.044	0.97739	0.0201	0.00251	0	0	0
523	SSL2.50CH01_93983755	SL2.50CH01	93983755	0.433	0.68262	0.31738	0	0	0	0
524	SSL2.50CH01_94016234	SL2.50CH01	94016234	0.015	0.99246	0.00754	0	0	0	0
525	SSL2.50CH01_94095533	SL2.50CH01	94095533	0.121	0.93561	0.06187	0.00253	0	0	0
526	SSL2.50CH01_94114596	SL2.50CH01	94114596	0.008	0.99617	0.00383	0	0	0	0
527	SSL2.50CH01_94245430	SL2.50CH01	94245430	0.084	0.95592	0.04408	0	0	0	0
528	SSL2.50CH01_94279273	SL2.50CH01	94279273	0.017	0.9914	0.0086	0	0	0	0
529	SSL2.50CH01_94358639	SL2.50CH01	94358639	0.125	0.93308	0.06692	0	0	0	0
530	SSL2.50CH01_94459241	SL2.50CH01	94459241	0.116	0.93844	0.06156	0	0	0	0
531	SSL2.50CH01_94479021	SL2.50CH01	94479021	0.177	0.90176	0.09824	0	0	0	0
532	SSL2.50CH01_94494300	SL2.50CH01	94494300	0.126	0.93257	0.06743	0	0	0	0
533	SSL2.50CH01_94514063	SL2.50CH01	94514063	0.123	0.93401	0.06599	0	0	0	0
534	SSL2.50CH01_94529278	SL2.50CH01	94529278	0.124	0.93358	0.06642	0	0	0	0
535	SSL2.50CH01_94547627	SL2.50CH01	94547627	0.005	0.99749	0.00251	0	0	0	0
536	SSL2.50CH01_94562687	SL2.50CH01	94562687	0.174	0.90351	0.09649	0	0	0	0
537	SSL2.50CH01_94592867	SL2.50CH01	94592867	0.116	0.93844	0.06156	0	0	0	0
538	SSL2.50CH01_94673006	SL2.50CH01	94673006	0.491	0.56692	0.43308	0	0	0	0
539	SSL2.50CH01_94722622	SL2.50CH01	94722622	0.476	0.61028	0.38972	0	0	0	0
540	SSL2.50CH01_94762824	SL2.50CH01	94762824	0.15	0.91834	0.08166	0	0	0	0
541	SSL2.50CH01_94806314	SL2.50CH01	94806314	0.06	0.96883	0.03117	0	0	0	0
542	SSL2.50CH01_94852088	SL2.50CH01	94852088	0.012	0.99372	0.00628	0	0	0	0
543	SSL2.50CH01_94890013	SL2.50CH01	94890013	0.162	0.9108	0.0892	0	0	0	0
544	SSL2.50CH01_94929923	SL2.50CH01	94929923	0.157	0.91436	0.08564	0	0	0	0
545	SSL2.50CH01_94949234	SL2.50CH01	94949234	0.068	0.96482	0.03518	0	0	0	0
546	SSL2.50CH01_94984973	SL2.50CH01	94984973	0.167	0.90829	0.09171	0	0	0	0
547	SSL2.50CH01_95024594	SL2.50CH01	95024594	0.133	0.92821	0.07179	0	0	0	0
548	SSL2.50CH01_95127616	SL2.50CH01	95127616	0.145	0.92139	0.07861	0	0	0	0
549	SSL2.50CH01_95261222	SL2.50CH01	95261222	0.162	0.91103	0.08897	0	0	0	0
550	SSL2.50CH01_95311740	SL2.50CH01	95311740	0.169	0.90704	0.09296	0	0	0	0
551	SSL2.50CH01_95432171	SL2.50CH01	95432171	0.134	0.92766	0.07234	0	0	0	0
552	SSL2.50CH01_95450560	SL2.50CH01	95450560	0.051	0.97362	0.02638	0	0	0	0
553	SSL2.50CH01_95501602	SL2.50CH01	95501602	0.071	0.96316	0.03684	0	0	0	0
554	SSL2.50CH01_95517829	SL2.50CH01	95517829	0.281	0.83079	0.16921	0	0	0	0
555	SSL2.50CH01_95551710	SL2.50CH01	95551710	0.126	0.93216	0.06784	0	0	0	0
556	SSL2.50CH01_95586749	SL2.50CH01	95586749	0.061	0.96867	0.03133	0	0	0	0
557	SSL2.50CH01_95607745	SL2.50CH01	95607745	0.089	0.95352	0.04648	0	0	0	0
558	SSL2.50CH01_95644968	SL2.50CH01	95644968	0.142	0.92337	0.07663	0	0	0	0
559	SSL2.50CH01_95736526	SL2.50CH01	95736526	0.01	0.99495	0.00505	0	0	0	0
560	SSL2.50CH01_95794489	SL2.50CH01	95794489	0.131	0.92965	0.07035	0	0	0	0
561	SSL2.50CH01_95809499	SL2.50CH01	95809499	0.039	0.9799	0.0201	0	0	0	0
562	SSL2.50CH01_95826586	SL2.50CH01	95826586	0.214	0.87845	0.12155	0	0	0	0
563	SSL2.50CH01_95861163	SL2.50CH01	95861163	0.159	0.9131	0.0869	0	0	0	0
564	SSL2.50CH01_95893119	SL2.50CH01	95893119	0.152	0.91709	0.08291	0	0	0	0
565	SSL2.50CH01_95908639	SL2.50CH01	95908639	0.074	0.96164	0.03836	0	0	0	0
566	SSL2.50CH01_95971325	SL2.50CH01	95971325	0.077	0.9597	0.0403	0	0	0	0
567	SSL2.50CH01_96026198	SL2.50CH01	96026198	0.199	0.88819	0.11181	0	0	0	0
568	SSL2.50CH01_96049074	SL2.50CH01	96049074	0.097	0.94898	0.05102	0	0	0	0
569	SSL2.50CH01_96126819	SL2.50CH01	96126819	0.12	0.93593	0.06407	0	0	0	0
570	SSL2.50CH01_96212143	SL2.50CH01	96212143	0.173	0.90452	0.09548	0	0	0	0
571	SSL2.50CH01_96227706	SL2.50CH01	96227706	0.02	0.98995	0.01005	0	0	0	0
572	SSL2.50CH01_96259449	SL2.50CH01	96259449	0.437	0.67714	0.32286	0	0	0	0
573	SSL2.50CH01_96274502	SL2.50CH01	96274502	0.423	0.69598	0.30402	0	0	0	0
574	SSL2.50CH01_96289568	SL2.50CH01	96289568	0.02	0.98995	0.01005	0	0	0	0
575	SSL2.50CH01_96377090	SL2.50CH01	96377090	0.087	0.95466	0.04534	0	0	0	0
576	SSL2.50CH01_96392159	SL2.50CH01	96392159	0.133	0.92839	0.07161	0	0	0	0
577	SSL2.50CH01_96407348	SL2.50CH01	96407348	0.07	0.96366	0.03634	0	0	0	0
578	SSL2.50CH01_96424478	SL2.50CH01	96424478	0.02	0.98995	0.01005	0	0	0	0
579	SSL2.50CH01_96439549	SL2.50CH01	96439549	0.025	0.98741	0.01259	0	0	0	0
580	SSL2.50CH01_96485771	SL2.50CH01	96485771	0.179	0.90075	0.09925	0	0	0	0
581	SSL2.50CH01_96522890	SL2.50CH01	96522890	0.104	0.94501	0.05499	0	0	0	0
582	SSL2.50CH01_96538163	SL2.50CH01	96538163	0.086	0.95477	0.04523	0	0	0	0
583	SSL2.50CH01_96579379	SL2.50CH01	96579379	0.483	0.59171	0.40829	0	0	0	0
584	SSL2.50CH01_96594991	SL2.50CH01	96594991	0.133	0.92839	0.07161	0	0	0	0
585	SSL2.50CH01_96610363	SL2.50CH01	96610363	0.129	0.9309	0.0691	0	0	0	0
586	SSL2.50CH01_96662907	SL2.50CH01	96662907	0.035	0.98228	0.01772	0	0	0	0
587	SSL2.50CH01_96700265	SL2.50CH01	96700265	0.01	0.99496	0.00504	0	0	0	0
588	SSL2.50CH01_96807738	SL2.50CH01	96807738	0.142	0.92308	0.07692	0	0	0	0
589	SSL2.50CH01_96945690	SL2.50CH01	96945690	0.178	0.901	0.099	0	0	0	0
590	SSL2.50CH01_97046255	SL2.50CH01	97046255	0.148	0.9198	0.0802	0	0	0	0
591	SSL2.50CH01_97087955	SL2.50CH01	97087955	0.176	0.90226	0.09774	0	0	0	0
592	SSL2.50CH01_97118860	SL2.50CH01	97118860	0.1	0.94724	0.05276	0	0	0	0
593	SSL2.50CH01_97325815	SL2.50CH01	97325815	0.08	0.95844	0.04156	0	0	0	0
594	SSL2.50CH01_97402412	SL2.50CH01	97402412	0.216	0.87688	0.12312	0	0	0	0
595	SSL2.50CH01_97434915	SL2.50CH01	97434915	0.111	0.94095	0.05905	0	0	0	0
596	SSL2.50CH01_97495506	SL2.50CH01	97495506	0.226	0.87028	0.12972	0	0	0	0
597	SSL2.50CH01_97510521	SL2.50CH01	97510521	0.143	0.92278	0.07722	0	0	0	0
598	SSL2.50CH01_97581278	SL2.50CH01	97581278	0.11	0.94148	0.05852	0	0	0	0
599	SSL2.50CH01_97720753	SL2.50CH01	97720753	0.109	0.94221	0.05779	0	0	0	0
600	SSL2.50CH01_97736135	SL2.50CH01	97736135	0.034	0.98246	0.01754	0	0	0	0
601	SSL2.50CH01_97751166	SL2.50CH01	97751166	0.194	0.89098	0.10902	0	0	0	0
602	SSL2.50CH01_97781590	SL2.50CH01	97781590	0.033	0.98329	0.01671	0	0	0	0
603	SSL2.50CH01_97833191	SL2.50CH01	97833191	0.073	0.96212	0.03788	0	0	0	0
604	SSL2.50CH01_97882915	SL2.50CH01	97882915	0.103	0.94529	0.05471	0	0	0	0
605	SSL2.50CH01_97932426	SL2.50CH01	97932426	0.066	0.96608	0.03392	0	0	0	0
606	SSL2.50CH01_97947729	SL2.50CH01	97947729	0.093	0.95101	0.04899	0	0	0	0
607	SSL2.50CH01_97963777	SL2.50CH01	97963777	0.197	0.88918	0.11082	0	0	0	0
608	SSL2.50CH01_98058972	SL2.50CH01	98058972	0.156	0.91497	0.08503	0	0	0	0
609	SSL2.50CH01_98089059	SL2.50CH01	98089059	0.093	0.95101	0.04899	0	0	0	0
610	SSL2.50CH01_98164538	SL2.50CH01	98164538	0.084	0.95603	0.04397	0	0	0	0
611	SSL2.50CH01_98220536	SL2.50CH01	98220536	0.417	0.70375	0.29625	0	0	0	0
612	SSL2.50CH01_98255123	SL2.50CH01	98255123	0.094	0.95063	0.04557	0.0038	0	0	0
613	SSL2.50CH01_98286698	SL2.50CH01	98286698	0.223	0.87218	0.12782	0	0	0	0
614	SSL2.50CH01_98388412	SL2.50CH01	98388412	0.03	0.98481	0.01519	0	0	0	0
615	SSL2.50CH01_98408670	SL2.50CH01	98408670	0.039	0.9799	0.0201	0	0	0	0
616	SSL2.50CH01_98424021	SL2.50CH01	98424021	0.222	0.87312	0.12688	0	0	0	0
617	SSL2.50CH01_98455308	SL2.50CH01	98455308	0.038	0.98092	0.01654	0.00254	0	0	0
618	SSL2.50CH02_1125783	SL2.50CH02	1125783	0.129	0.93056	0.06944	0	0	0	0
619	SSL2.50CH02_1238355	SL2.50CH02	1238355	0.089	0.9534	0.0466	0	0	0	0
620	SSL2.50CH02_2536361	SL2.50CH02	2536361	0.086	0.95477	0.04523	0	0	0	0
621	SSL2.50CH02_2553179	SL2.50CH02	2553179	0.165	0.90932	0.09068	0	0	0	0
622	SSL2.50CH02_2568363	SL2.50CH02	2568363	0.083	0.95674	0.04326	0	0	0	0
623	SSL2.50CH02_3229719	SL2.50CH02	3229719	0.119	0.93671	0.06329	0	0	0	0
624	SSL2.50CH02_3272744	SL2.50CH02	3272744	0.03	0.98489	0.01511	0	0	0	0
625	SSL2.50CH02_3732982	SL2.50CH02	3732982	0.17	0.90602	0.09398	0	0	0	0
626	SSL2.50CH02_4070969	SL2.50CH02	4070969	0.165	0.90955	0.09045	0	0	0	0
627	SSL2.50CH02_4337594	SL2.50CH02	4337594	0.162	0.91103	0.08897	0	0	0	0
628	SSL2.50CH02_4486062	SL2.50CH02	4486062	0.177	0.90176	0.09824	0	0	0	0
629	SSL2.50CH02_5077703	SL2.50CH02	5077703	0.13	0.93038	0.06962	0	0	0	0
630	SSL2.50CH02_5187356	SL2.50CH02	5187356	0.04	0.9798	0.0202	0	0	0	0
631	SSL2.50CH02_7331329	SL2.50CH02	7331329	0.03	0.98496	0.01504	0	0	0	0
632	SSL2.50CH02_7494143	SL2.50CH02	7494143	0.13	0.93038	0.06962	0	0	0	0
633	SSL2.50CH02_8039296	SL2.50CH02	8039296	0.127	0.93182	0.06818	0	0	0	0
634	SSL2.50CH02_8054524	SL2.50CH02	8054524	0.12	0.93577	0.06423	0	0	0	0
635	SSL2.50CH02_8330733	SL2.50CH02	8330733	0.112	0.94036	0.05838	0.00127	0	0	0
636	SSL2.50CH02_8405765	SL2.50CH02	8405765	0.087	0.95466	0.04534	0	0	0	0
637	SSL2.50CH02_8911005	SL2.50CH02	8911005	0.084	0.95603	0.04397	0	0	0	0
638	SSL2.50CH02_8943839	SL2.50CH02	8943839	0.135	0.92748	0.07252	0	0	0	0
639	SSL2.50CH02_9053123	SL2.50CH02	9053123	0.171	0.90578	0.09422	0	0	0	0
640	SSL2.50CH02_9216201	SL2.50CH02	9216201	0.163	0.91058	0.08942	0	0	0	0
641	SSL2.50CH02_13824078	SL2.50CH02	13824078	0.095	0.95	0.05	0	0	0	0
642	SSL2.50CH02_14883600	SL2.50CH02	14883600	0.096	0.94924	0.05076	0	0	0	0
643	SSL2.50CH02_14935771	SL2.50CH02	14935771	0.152	0.91729	0.08271	0	0	0	0
644	SSL2.50CH02_15288322	SL2.50CH02	15288322	0.175	0.90327	0.09673	0	0	0	0
645	SSL2.50CH02_15649431	SL2.50CH02	15649431	0.165	0.90955	0.09045	0	0	0	0
646	SSL2.50CH02_15672289	SL2.50CH02	15672289	0.093	0.95113	0.04887	0	0	0	0
647	SSL2.50CH02_15736538	SL2.50CH02	15736538	0.166	0.90852	0.09148	0	0	0	0
648	SSL2.50CH02_15760487	SL2.50CH02	15760487	0.173	0.90452	0.09548	0	0	0	0
649	SSL2.50CH02_15775782	SL2.50CH02	15775782	0.121	0.93557	0.06443	0	0	0	0
650	SSL2.50CH02_15828990	SL2.50CH02	15828990	0.093	0.95101	0.04899	0	0	0	0
651	SSL2.50CH02_15989412	SL2.50CH02	15989412	0.093	0.95125	0.04875	0	0	0	0
652	SSL2.50CH02_16559743	SL2.50CH02	16559743	0.165	0.90955	0.09045	0	0	0	0
653	SSL2.50CH02_17950749	SL2.50CH02	17950749	0.11	0.94162	0.05838	0	0	0	0
654	SSL2.50CH02_17970858	SL2.50CH02	17970858	0.035	0.98241	0.01759	0	0	0	0
655	SSL2.50CH02_18374894	SL2.50CH02	18374894	0.035	0.98241	0.01759	0	0	0	0
656	SSL2.50CH02_20277788	SL2.50CH02	20277788	0.114	0.93955	0.06045	0	0	0	0
657	SSL2.50CH02_20334143	SL2.50CH02	20334143	0.351	0.77261	0.22739	0	0	0	0
658	SSL2.50CH02_20374927	SL2.50CH02	20374927	0.035	0.98237	0.01763	0	0	0	0
659	SSL2.50CH02_20819288	SL2.50CH02	20819288	0.177	0.90201	0.09799	0	0	0	0
660	SSL2.50CH02_20851604	SL2.50CH02	20851604	0.175	0.90327	0.09673	0	0	0	0
661	SSL2.50CH02_21271096	SL2.50CH02	21271096	0.034	0.98246	0.01754	0	0	0	0
662	SSL2.50CH02_21306034	SL2.50CH02	21306034	0.035	0.98241	0.01759	0	0	0	0
663	SSL2.50CH02_21384628	SL2.50CH02	21384628	0.12	0.93593	0.06407	0	0	0	0
664	SSL2.50CH02_21482079	SL2.50CH02	21482079	0.171	0.90578	0.09422	0	0	0	0
665	SSL2.50CH02_21772113	SL2.50CH02	21772113	0.022	0.98866	0.01134	0	0	0	0
666	SSL2.50CH02_22090971	SL2.50CH02	22090971	0.1	0.94697	0.05303	0	0	0	0
667	SSL2.50CH02_22231882	SL2.50CH02	22231882	0.149	0.91875	0.08125	0	0	0	0
668	SSL2.50CH02_22520324	SL2.50CH02	22520324	0.089	0.95352	0.04648	0	0	0	0
669	SSL2.50CH02_22567952	SL2.50CH02	22567952	0.162	0.91103	0.08897	0	0	0	0
670	SSL2.50CH02_22637419	SL2.50CH02	22637419	0.167	0.90829	0.09171	0	0	0	0
671	SSL2.50CH02_22954702	SL2.50CH02	22954702	0.172	0.905	0.095	0	0	0	0
672	SSL2.50CH02_22975421	SL2.50CH02	22975421	0.089	0.95328	0.04672	0	0	0	0
673	SSL2.50CH02_23172730	SL2.50CH02	23172730	0.135	0.92695	0.07305	0	0	0	0
674	SSL2.50CH02_23284880	SL2.50CH02	23284880	0.487	0.58098	0.41902	0	0	0	0
675	SSL2.50CH02_23335578	SL2.50CH02	23335578	0.087	0.95466	0.04534	0	0	0	0
676	SSL2.50CH02_23362164	SL2.50CH02	23362164	0.16	0.91206	0.08794	0	0	0	0
677	SSL2.50CH02_23377649	SL2.50CH02	23377649	0.059	0.96977	0.03023	0	0	0	0
678	SSL2.50CH02_23488856	SL2.50CH02	23488856	0.125	0.93325	0.06675	0	0	0	0
679	SSL2.50CH02_23612703	SL2.50CH02	23612703	0.091	0.95226	0.04774	0	0	0	0
680	SSL2.50CH02_24131327	SL2.50CH02	24131327	0.091	0.95226	0.04774	0	0	0	0
681	SSL2.50CH02_24210116	SL2.50CH02	24210116	0.095	0.94975	0.05025	0	0	0	0
682	SSL2.50CH02_24420828	SL2.50CH02	24420828	0.177	0.90201	0.09799	0	0	0	0
683	SSL2.50CH02_24607627	SL2.50CH02	24607627	0.174	0.90351	0.09649	0	0	0	0
684	SSL2.50CH02_24667221	SL2.50CH02	24667221	0.093	0.95113	0.04887	0	0	0	0
685	SSL2.50CH02_24688477	SL2.50CH02	24688477	0.13	0.93003	0.06997	0	0	0	0
686	SSL2.50CH02_24712425	SL2.50CH02	24712425	0.171	0.90578	0.09422	0	0	0	0
687	SSL2.50CH02_25166507	SL2.50CH02	25166507	0.199	0.88819	0.11181	0	0	0	0
688	SSL2.50CH02_25775472	SL2.50CH02	25775472	0.078	0.9596	0.03788	0.00253	0	0	0
689	SSL2.50CH02_25937012	SL2.50CH02	25937012	0.164	0.90977	0.09023	0	0	0	0
690	SSL2.50CH02_26754094	SL2.50CH02	26754094	0.147	0.92005	0.07995	0	0	0	0
691	SSL2.50CH02_26907620	SL2.50CH02	26907620	0.161	0.91206	0.08543	0.00251	0	0	0
692	SSL2.50CH02_27048135	SL2.50CH02	27048135	0.183	0.90075	0.07161	0.02764	0	0	0
693	SSL2.50CH02_27224271	SL2.50CH02	27224271	0.082	0.95718	0.04282	0	0	0	0
694	SSL2.50CH02_27301798	SL2.50CH02	27301798	0.497	0.5404	0.4596	0	0	0	0
695	SSL2.50CH02_27899741	SL2.50CH02	27899741	0.114	0.93924	0.06076	0	0	0	0
696	SSL2.50CH02_28007762	SL2.50CH02	28007762	0.044	0.97739	0.02261	0	0	0	0
697	SSL2.50CH02_28214321	SL2.50CH02	28214321	0.112	0.94051	0.05949	0	0	0	0
698	SSL2.50CH02_28274559	SL2.50CH02	28274559	0.169	0.9068	0.0932	0	0	0	0
699	SSL2.50CH02_28525485	SL2.50CH02	28525485	0.11	0.94162	0.05838	0	0	0	0
700	SSL2.50CH02_28847497	SL2.50CH02	28847497	0.065	0.96625	0.03375	0	0	0	0
701	SSL2.50CH02_28977349	SL2.50CH02	28977349	0.025	0.98744	0.01256	0	0	0	0
702	SSL2.50CH02_29258425	SL2.50CH02	29258425	0.187	0.89573	0.10427	0	0	0	0
703	SSL2.50CH02_30706106	SL2.50CH02	30706106	0.216	0.87688	0.12312	0	0	0	0
704	SSL2.50CH02_30788664	SL2.50CH02	30788664	0.171	0.90554	0.09446	0	0	0	0
705	SSL2.50CH02_30965442	SL2.50CH02	30965442	0.025	0.98744	0.01256	0	0	0	0
706	SSL2.50CH02_30983829	SL2.50CH02	30983829	0.037	0.98111	0.01889	0	0	0	0
707	SSL2.50CH02_31081093	SL2.50CH02	31081093	0.118	0.93703	0.06297	0	0	0	0
708	SSL2.50CH02_31274839	SL2.50CH02	31274839	0.171	0.90578	0.09422	0	0	0	0
709	SSL2.50CH02_31315863	SL2.50CH02	31315863	0.02	0.9899	0.0101	0	0	0	0
710	SSL2.50CH02_31491507	SL2.50CH02	31491507	0.175	0.90327	0.09673	0	0	0	0
711	SSL2.50CH02_31539667	SL2.50CH02	31539667	0.109	0.94236	0.05764	0	0	0	0
712	SSL2.50CH02_33160006	SL2.50CH02	33160006	0.096	0.94924	0.05076	0	0	0	0
713	SSL2.50CH02_33290311	SL2.50CH02	33290311	0.02	0.9899	0.0101	0	0	0	0
714	SSL2.50CH02_33309849	SL2.50CH02	33309849	0.481	0.59673	0.40327	0	0	0	0
715	SSL2.50CH02_33325007	SL2.50CH02	33325007	0.127	0.9317	0.0683	0	0	0	0
716	SSL2.50CH02_33345454	SL2.50CH02	33345454	0.003	0.99874	0.00126	0	0	0	0
717	SSL2.50CH02_33365408	SL2.50CH02	33365408	0.169	0.90704	0.09296	0	0	0	0
718	SSL2.50CH02_33435153	SL2.50CH02	33435153	0.118	0.93687	0.06313	0	0	0	0
719	SSL2.50CH02_33640232	SL2.50CH02	33640232	0.122	0.93484	0.06516	0	0	0	0
720	SSL2.50CH02_33673480	SL2.50CH02	33673480	0.124	0.93358	0.06642	0	0	0	0
721	SSL2.50CH02_33706417	SL2.50CH02	33706417	0.139	0.92462	0.07538	0	0	0	0
722	SSL2.50CH02_33849341	SL2.50CH02	33849341	0.447	0.66247	0.33753	0	0	0	0
723	SSL2.50CH02_33957869	SL2.50CH02	33957869	0.5	0.50126	0.49874	0	0	0	0
724	SSL2.50CH02_34157103	SL2.50CH02	34157103	0.448	0.66158	0.33842	0	0	0	0
725	SSL2.50CH02_34298169	SL2.50CH02	34298169	0.424	0.69472	0.30528	0	0	0	0
726	SSL2.50CH02_34366211	SL2.50CH02	34366211	0.158	0.91353	0.08647	0	0	0	0
727	SSL2.50CH02_34445781	SL2.50CH02	34445781	0.411	0.71231	0.28518	0.00251	0	0	0
728	SSL2.50CH02_34472675	SL2.50CH02	34472675	0.11	0.94177	0.05823	0	0	0	0
729	SSL2.50CH02_34526292	SL2.50CH02	34526292	0.47	0.62155	0.37845	0	0	0	0
730	SSL2.50CH02_34665150	SL2.50CH02	34665150	0.111	0.94081	0.05919	0	0	0	0
731	SSL2.50CH02_34812927	SL2.50CH02	34812927	0.16	0.91206	0.08794	0	0	0	0
732	SSL2.50CH02_34892071	SL2.50CH02	34892071	0.088	0.95385	0.04615	0	0	0	0
733	SSL2.50CH02_35044255	SL2.50CH02	35044255	0.126	0.93257	0.06743	0	0	0	0
734	SSL2.50CH02_35160975	SL2.50CH02	35160975	0.112	0.94051	0.05823	0.00127	0	0	0
735	SSL2.50CH02_35177583	SL2.50CH02	35177583	0.429	0.68844	0.31156	0	0	0	0
736	SSL2.50CH02_35214050	SL2.50CH02	35214050	0.409	0.71285	0.28715	0	0	0	0
737	SSL2.50CH02_35234235	SL2.50CH02	35234235	0.169	0.9068	0.0932	0	0	0	0
738	SSL2.50CH02_35249895	SL2.50CH02	35249895	0.086	0.95477	0.04523	0	0	0	0
739	SSL2.50CH02_35305342	SL2.50CH02	35305342	0.463	0.63602	0.36398	0	0	0	0
740	SSL2.50CH02_35355352	SL2.50CH02	35355352	0.091	0.95202	0.04798	0	0	0	0
741	SSL2.50CH02_35399831	SL2.50CH02	35399831	0.459	0.64358	0.35642	0	0	0	0
742	SSL2.50CH02_35414951	SL2.50CH02	35414951	0.177	0.90201	0.09799	0	0	0	0
743	SSL2.50CH02_35436046	SL2.50CH02	35436046	0.073	0.96231	0.03769	0	0	0	0
744	SSL2.50CH02_35559021	SL2.50CH02	35559021	0.148	0.9196	0.0804	0	0	0	0
745	SSL2.50CH02_35795382	SL2.50CH02	35795382	0.073	0.96212	0.03662	0.00126	0	0	0
746	SSL2.50CH02_35827580	SL2.50CH02	35827580	0.155	0.91519	0.08481	0	0	0	0
747	SSL2.50CH02_36230219	SL2.50CH02	36230219	0.042	0.97859	0.02141	0	0	0	0
748	SSL2.50CH02_36319904	SL2.50CH02	36319904	0.157	0.91583	0.05402	0.03015	0	0	0
749	SSL2.50CH02_36441891	SL2.50CH02	36441891	0.023	0.98861	0.01139	0	0	0	0
750	SSL2.50CH02_36582589	SL2.50CH02	36582589	0.042	0.97864	0.02136	0	0	0	0
751	SSL2.50CH02_36608731	SL2.50CH02	36608731	0.116	0.93829	0.06171	0	0	0	0
752	SSL2.50CH02_36696643	SL2.50CH02	36696643	0.122	0.93467	0.06533	0	0	0	0
753	SSL2.50CH02_36793352	SL2.50CH02	36793352	0.049	0.97487	0.02513	0	0	0	0
754	SSL2.50CH02_36836261	SL2.50CH02	36836261	0.068	0.96456	0.03544	0	0	0	0
755	SSL2.50CH02_36872346	SL2.50CH02	36872346	0.181	0.89924	0.10076	0	0	0	0
756	SSL2.50CH02_37171562	SL2.50CH02	37171562	0.213	0.87909	0.12091	0	0	0	0
757	SSL2.50CH02_37187047	SL2.50CH02	37187047	0.247	0.85587	0.14413	0	0	0	0
758	SSL2.50CH02_37271844	SL2.50CH02	37271844	0.177	0.90201	0.09799	0	0	0	0
759	SSL2.50CH02_37287661	SL2.50CH02	37287661	0.192	0.89268	0.10732	0	0	0	0
760	SSL2.50CH02_37352939	SL2.50CH02	37352939	0.41	0.71159	0.28841	0	0	0	0
761	SSL2.50CH02_37401439	SL2.50CH02	37401439	0.242	0.85894	0.14106	0	0	0	0
762	SSL2.50CH02_37602203	SL2.50CH02	37602203	0.345	0.77834	0.22166	0	0	0	0
763	SSL2.50CH02_37722107	SL2.50CH02	37722107	0.032	0.98363	0.01637	0	0	0	0
764	SSL2.50CH02_37738847	SL2.50CH02	37738847	0.285	0.82824	0.17176	0	0	0	0
765	SSL2.50CH02_37811707	SL2.50CH02	37811707	0.127	0.93199	0.06801	0	0	0	0
766	SSL2.50CH02_37876964	SL2.50CH02	37876964	0.128	0.9313	0.0687	0	0	0	0
767	SSL2.50CH02_37912461	SL2.50CH02	37912461	0.146	0.92085	0.07915	0	0	0	0
768	SSL2.50CH02_37935638	SL2.50CH02	37935638	0.134	0.92766	0.07234	0	0	0	0
769	SSL2.50CH02_37980898	SL2.50CH02	37980898	0.054	0.97229	0.02771	0	0	0	0
770	SSL2.50CH02_38001714	SL2.50CH02	38001714	0.137	0.92607	0.07393	0	0	0	0
771	SSL2.50CH02_38026462	SL2.50CH02	38026462	0.159	0.9131	0.0869	0	0	0	0
772	SSL2.50CH02_38096665	SL2.50CH02	38096665	0.16	0.91206	0.08794	0	0	0	0
773	SSL2.50CH02_38111769	SL2.50CH02	38111769	0.039	0.9799	0.0201	0	0	0	0
774	SSL2.50CH02_38205933	SL2.50CH02	38205933	0.466	0.63098	0.36902	0	0	0	0
775	SSL2.50CH02_38221684	SL2.50CH02	38221684	0.175	0.90302	0.09698	0	0	0	0
776	SSL2.50CH02_38282321	SL2.50CH02	38282321	0.148	0.9196	0.0804	0	0	0	0
777	SSL2.50CH02_38298095	SL2.50CH02	38298095	0.47	0.62217	0.37783	0	0	0	0
778	SSL2.50CH02_38335619	SL2.50CH02	38335619	0.124	0.93342	0.06658	0	0	0	0
779	SSL2.50CH02_38483516	SL2.50CH02	38483516	0.151	0.91793	0.08207	0	0	0	0
780	SSL2.50CH02_38518022	SL2.50CH02	38518022	0.12	0.93561	0.06439	0	0	0	0
781	SSL2.50CH02_38612312	SL2.50CH02	38612312	0.173	0.90452	0.09548	0	0	0	0
782	SSL2.50CH02_38629014	SL2.50CH02	38629014	0.045	0.97704	0.02296	0	0	0	0
783	SSL2.50CH02_38779908	SL2.50CH02	38779908	0.146	0.92085	0.07915	0	0	0	0
784	SSL2.50CH02_38795453	SL2.50CH02	38795453	0.162	0.9108	0.0892	0	0	0	0
785	SSL2.50CH02_39097032	SL2.50CH02	39097032	0.16	0.91228	0.08772	0	0	0	0
786	SSL2.50CH02_39204711	SL2.50CH02	39204711	0.167	0.90806	0.09194	0	0	0	0
787	SSL2.50CH02_39220403	SL2.50CH02	39220403	0.14	0.92443	0.07557	0	0	0	0
788	SSL2.50CH02_39237479	SL2.50CH02	39237479	0.111	0.94095	0.05905	0	0	0	0
789	SSL2.50CH02_39321214	SL2.50CH02	39321214	0.118	0.93719	0.06281	0	0	0	0
790	SSL2.50CH02_39396781	SL2.50CH02	39396781	0.042	0.97864	0.02136	0	0	0	0
791	SSL2.50CH02_39453941	SL2.50CH02	39453941	0.123	0.93434	0.06566	0	0	0	0
792	SSL2.50CH02_39470385	SL2.50CH02	39470385	0.161	0.91184	0.08816	0	0	0	0
793	SSL2.50CH02_39486098	SL2.50CH02	39486098	0.149	0.91878	0.08122	0	0	0	0
794	SSL2.50CH02_39532507	SL2.50CH02	39532507	0.025	0.98744	0.01256	0	0	0	0
795	SSL2.50CH02_39614239	SL2.50CH02	39614239	0.073	0.96222	0.03778	0	0	0	0
796	SSL2.50CH02_39651522	SL2.50CH02	39651522	0.182	0.8985	0.1015	0	0	0	0
797	SSL2.50CH02_39684384	SL2.50CH02	39684384	0.052	0.97342	0.02658	0	0	0	0
798	SSL2.50CH02_39820242	SL2.50CH02	39820242	0.177	0.90201	0.09799	0	0	0	0
799	SSL2.50CH02_40001648	SL2.50CH02	40001648	0.068	0.96474	0.03526	0	0	0	0
800	SSL2.50CH02_40037678	SL2.50CH02	40037678	0.482	0.59572	0.40428	0	0	0	0
801	SSL2.50CH02_40071059	SL2.50CH02	40071059	0.035	0.98237	0.01763	0	0	0	0
802	SSL2.50CH02_40117043	SL2.50CH02	40117043	0.111	0.94081	0.05919	0	0	0	0
803	SSL2.50CH02_40221813	SL2.50CH02	40221813	0.061	0.96851	0.03149	0	0	0	0
804	SSL2.50CH02_40317746	SL2.50CH02	40317746	0.152	0.91688	0.08312	0	0	0	0
805	SSL2.50CH02_40366654	SL2.50CH02	40366654	0.195	0.89043	0.10957	0	0	0	0
806	SSL2.50CH02_40398466	SL2.50CH02	40398466	0.217	0.8794	0.09422	0.02638	0	0	0
807	SSL2.50CH02_40413642	SL2.50CH02	40413642	0.199	0.88819	0.11181	0	0	0	0
808	SSL2.50CH02_40455753	SL2.50CH02	40455753	0.179	0.9005	0.0995	0	0	0	0
809	SSL2.50CH02_40470758	SL2.50CH02	40470758	0.037	0.9812	0.0188	0	0	0	0
810	SSL2.50CH02_40564958	SL2.50CH02	40564958	0.087	0.95466	0.04534	0	0	0	0
811	SSL2.50CH02_40583999	SL2.50CH02	40583999	0.14	0.92455	0.07545	0	0	0	0
812	SSL2.50CH02_40628916	SL2.50CH02	40628916	0.187	0.89547	0.10453	0	0	0	0
813	SSL2.50CH02_40679978	SL2.50CH02	40679978	0.042	0.9787	0.0213	0	0	0	0
814	SSL2.50CH02_40700502	SL2.50CH02	40700502	0.162	0.91103	0.08897	0	0	0	0
815	SSL2.50CH02_40716332	SL2.50CH02	40716332	0.14	0.92443	0.07179	0.00378	0	0	0
816	SSL2.50CH02_40786832	SL2.50CH02	40786832	0.146	0.92065	0.07809	0.00126	0	0	0
817	SSL2.50CH02_40813454	SL2.50CH02	40813454	0.189	0.89447	0.10553	0	0	0	0
818	SSL2.50CH02_40833101	SL2.50CH02	40833101	0.465	0.63198	0.36802	0	0	0	0
819	SSL2.50CH02_40973900	SL2.50CH02	40973900	0.105	0.94458	0.05542	0	0	0	0
820	SSL2.50CH02_40989077	SL2.50CH02	40989077	0.123	0.93418	0.06582	0	0	0	0
821	SSL2.50CH02_41113745	SL2.50CH02	41113745	0.111	0.9411	0.0589	0	0	0	0
822	SSL2.50CH02_41128837	SL2.50CH02	41128837	0.143	0.92231	0.07769	0	0	0	0
823	SSL2.50CH02_41143876	SL2.50CH02	41143876	0.156	0.91457	0.08543	0	0	0	0
824	SSL2.50CH02_41228606	SL2.50CH02	41228606	0.015	0.99246	0.00754	0	0	0	0
825	SSL2.50CH02_41326259	SL2.50CH02	41326259	0.086	0.95489	0.04511	0	0	0	0
826	SSL2.50CH02_41341381	SL2.50CH02	41341381	0.085	0.9557	0.0443	0	0	0	0
827	SSL2.50CH02_41384003	SL2.50CH02	41384003	0.047	0.97601	0.02399	0	0	0	0
828	SSL2.50CH02_41540881	SL2.50CH02	41540881	0.098	0.94836	0.05164	0	0	0	0
829	SSL2.50CH02_41605351	SL2.50CH02	41605351	0.145	0.92105	0.07895	0	0	0	0
830	SSL2.50CH02_41641659	SL2.50CH02	41641659	0.027	0.98622	0.01378	0	0	0	0
831	SSL2.50CH02_41671850	SL2.50CH02	41671850	0.02	0.99	0.01	0	0	0	0
832	SSL2.50CH02_41801781	SL2.50CH02	41801781	0.163	0.91058	0.08942	0	0	0	0
833	SSL2.50CH02_41921703	SL2.50CH02	41921703	0.243	0.8584	0.1416	0	0	0	0
834	SSL2.50CH02_41976436	SL2.50CH02	41976436	0.247	0.85553	0.14447	0	0	0	0
835	SSL2.50CH02_41994219	SL2.50CH02	41994219	0.209	0.88131	0.11869	0	0	0	0
836	SSL2.50CH02_42011225	SL2.50CH02	42011225	0.124	0.93377	0.06623	0	0	0	0
837	SSL2.50CH02_42107210	SL2.50CH02	42107210	0.233	0.86524	0.13476	0	0	0	0
838	SSL2.50CH02_42141612	SL2.50CH02	42141612	0.114	0.93955	0.06045	0	0	0	0
839	SSL2.50CH02_42180239	SL2.50CH02	42180239	0.133	0.92821	0.07179	0	0	0	0
840	SSL2.50CH02_42274139	SL2.50CH02	42274139	0.241	0.8602	0.1398	0	0	0	0
841	SSL2.50CH02_42509136	SL2.50CH02	42509136	0.125	0.93342	0.06407	0.00251	0	0	0
842	SSL2.50CH02_42553608	SL2.50CH02	42553608	0.18	0.89975	0.10025	0	0	0	0
843	SSL2.50CH02_42569849	SL2.50CH02	42569849	0.356	0.76817	0.23183	0	0	0	0
844	SSL2.50CH02_42585609	SL2.50CH02	42585609	0.102	0.94612	0.05388	0	0	0	0
845	SSL2.50CH02_42745088	SL2.50CH02	42745088	0.202	0.88596	0.11404	0	0	0	0
846	SSL2.50CH02_42803422	SL2.50CH02	42803422	0.374	0.75126	0.24874	0	0	0	0
847	SSL2.50CH02_42880628	SL2.50CH02	42880628	0.175	0.90327	0.09673	0	0	0	0
848	SSL2.50CH02_42897569	SL2.50CH02	42897569	0.148	0.9196	0.0804	0	0	0	0
849	SSL2.50CH02_42950045	SL2.50CH02	42950045	0.244	0.85804	0.14196	0	0	0	0
850	SSL2.50CH02_42985120	SL2.50CH02	42985120	0.233	0.86558	0.13442	0	0	0	0
851	SSL2.50CH02_43057518	SL2.50CH02	43057518	0.091	0.95238	0.04762	0	0	0	0
852	SSL2.50CH02_43175755	SL2.50CH02	43175755	0.118	0.93719	0.06281	0	0	0	0
853	SSL2.50CH02_43214017	SL2.50CH02	43214017	0.186	0.89599	0.10401	0	0	0	0
854	SSL2.50CH02_43261064	SL2.50CH02	43261064	0.137	0.92621	0.07379	0	0	0	0
855	SSL2.50CH02_43291158	SL2.50CH02	43291158	0.175	0.90327	0.09673	0	0	0	0
856	SSL2.50CH02_43318145	SL2.50CH02	43318145	0.08	0.95844	0.04156	0	0	0	0
857	SSL2.50CH02_43420824	SL2.50CH02	43420824	0.105	0.94458	0.05542	0	0	0	0
858	SSL2.50CH02_43464198	SL2.50CH02	43464198	0.082	0.95707	0.04293	0	0	0	0
859	SSL2.50CH02_43479225	SL2.50CH02	43479225	0.107	0.94318	0.05682	0	0	0	0
860	SSL2.50CH02_43653346	SL2.50CH02	43653346	0.098	0.94823	0.05177	0	0	0	0
861	SSL2.50CH02_43668416	SL2.50CH02	43668416	0.02	0.9899	0.0101	0	0	0	0
862	SSL2.50CH02_43700657	SL2.50CH02	43700657	0.054	0.97243	0.02757	0	0	0	0
863	SSL2.50CH02_43788519	SL2.50CH02	43788519	0.03	0.98485	0.01515	0	0	0	0
864	SSL2.50CH02_43858421	SL2.50CH02	43858421	0.122	0.93484	0.06266	0.00251	0	0	0
865	SSL2.50CH02_43873527	SL2.50CH02	43873527	0.144	0.92191	0.07809	0	0	0	0
866	SSL2.50CH02_43905817	SL2.50CH02	43905817	0.14	0.92443	0.07557	0	0	0	0
867	SSL2.50CH02_43955396	SL2.50CH02	43955396	0.022	0.98866	0.01134	0	0	0	0
868	SSL2.50CH02_43970905	SL2.50CH02	43970905	0.153	0.91646	0.08354	0	0	0	0
869	SSL2.50CH02_44040282	SL2.50CH02	44040282	0.182	0.8985	0.1015	0	0	0	0
870	SSL2.50CH02_44071744	SL2.50CH02	44071744	0.105	0.94416	0.05584	0	0	0	0
871	SSL2.50CH02_44093250	SL2.50CH02	44093250	0.169	0.90704	0.09296	0	0	0	0
872	SSL2.50CH02_44116459	SL2.50CH02	44116459	0.035	0.98241	0.01759	0	0	0	0
873	SSL2.50CH02_44186323	SL2.50CH02	44186323	0.131	0.92965	0.07035	0	0	0	0
874	SSL2.50CH02_44379368	SL2.50CH02	44379368	0.042	0.97864	0.02136	0	0	0	0
875	SSL2.50CH02_44477983	SL2.50CH02	44477983	0.079	0.95854	0.04146	0	0	0	0
876	SSL2.50CH02_44591753	SL2.50CH02	44591753	0.027	0.98618	0.01131	0.00251	0	0	0
877	SSL2.50CH02_44608272	SL2.50CH02	44608272	0.103	0.94557	0.05443	0	0	0	0
878	SSL2.50CH02_44683504	SL2.50CH02	44683504	0.102	0.94584	0.05416	0	0	0	0
879	SSL2.50CH02_44700013	SL2.50CH02	44700013	0.124	0.93342	0.06658	0	0	0	0
880	SSL2.50CH02_44717035	SL2.50CH02	44717035	0.169	0.90704	0.09296	0	0	0	0
881	SSL2.50CH02_44748237	SL2.50CH02	44748237	0.146	0.92065	0.07935	0	0	0	0
882	SSL2.50CH02_44779391	SL2.50CH02	44779391	0.497	0.53571	0.46429	0	0	0	0
883	SSL2.50CH02_44794465	SL2.50CH02	44794465	0.032	0.98371	0.01629	0	0	0	0
884	SSL2.50CH02_44809729	SL2.50CH02	44809729	0.015	0.99241	0.00759	0	0	0	0
885	SSL2.50CH02_44847155	SL2.50CH02	44847155	0.015	0.99246	0.00754	0	0	0	0
886	SSL2.50CH02_44932013	SL2.50CH02	44932013	0.054	0.97229	0.02771	0	0	0	0
887	SSL2.50CH02_44951897	SL2.50CH02	44951897	0.177	0.90201	0.09799	0	0	0	0
888	SSL2.50CH02_44992215	SL2.50CH02	44992215	0.069	0.96438	0.03562	0	0	0	0
889	SSL2.50CH02_45008597	SL2.50CH02	45008597	0.141	0.92386	0.07614	0	0	0	0
890	SSL2.50CH02_45046984	SL2.50CH02	45046984	0.017	0.99123	0.00877	0	0	0	0
891	SSL2.50CH02_45085268	SL2.50CH02	45085268	0.088	0.95396	0.04604	0	0	0	0
892	SSL2.50CH02_45104429	SL2.50CH02	45104429	0.032	0.98371	0.01629	0	0	0	0
893	SSL2.50CH02_45225440	SL2.50CH02	45225440	0.047	0.97607	0.02393	0	0	0	0
894	SSL2.50CH02_45259924	SL2.50CH02	45259924	0.184	0.89724	0.10276	0	0	0	0
895	SSL2.50CH02_45279357	SL2.50CH02	45279357	0.134	0.92766	0.07234	0	0	0	0
896	SSL2.50CH02_45447408	SL2.50CH02	45447408	0.365	0.76005	0.23995	0	0	0	0
897	SSL2.50CH02_45521288	SL2.50CH02	45521288	0.143	0.92231	0.07769	0	0	0	0
898	SSL2.50CH02_45557854	SL2.50CH02	45557854	0.403	0.71985	0.28015	0	0	0	0
899	SSL2.50CH02_45601923	SL2.50CH02	45601923	0.177	0.90176	0.09824	0	0	0	0
900	SSL2.50CH02_45618690	SL2.50CH02	45618690	0.049	0.97494	0.02506	0	0	0	0
901	SSL2.50CH02_45633939	SL2.50CH02	45633939	0.056	0.97111	0.02889	0	0	0	0
902	SSL2.50CH02_45649222	SL2.50CH02	45649222	0.054	0.97243	0.02757	0	0	0	0
903	SSL2.50CH02_45664402	SL2.50CH02	45664402	0.063	0.96742	0.03258	0	0	0	0
904	SSL2.50CH02_45679715	SL2.50CH02	45679715	0.126	0.93233	0.06767	0	0	0	0
905	SSL2.50CH02_45695290	SL2.50CH02	45695290	0.185	0.89698	0.10302	0	0	0	0
906	SSL2.50CH02_45859944	SL2.50CH02	45859944	0.173	0.90428	0.09572	0	0	0	0
907	SSL2.50CH02_45878043	SL2.50CH02	45878043	0.167	0.90806	0.09194	0	0	0	0
908	SSL2.50CH02_45911923	SL2.50CH02	45911923	0.049	0.97494	0.02506	0	0	0	0
909	SSL2.50CH02_45944342	SL2.50CH02	45944342	0.137	0.92602	0.07398	0	0	0	0
910	SSL2.50CH02_45974068	SL2.50CH02	45974068	0.167	0.90829	0.09171	0	0	0	0
911	SSL2.50CH02_45989762	SL2.50CH02	45989762	0.147	0.91985	0.08015	0	0	0	0
912	SSL2.50CH02_46004834	SL2.50CH02	46004834	0.358	0.76633	0.23367	0	0	0	0
913	SSL2.50CH02_46163722	SL2.50CH02	46163722	0.193	0.89196	0.10804	0	0	0	0
914	SSL2.50CH02_46324683	SL2.50CH02	46324683	0.189	0.89421	0.10579	0	0	0	0
915	SSL2.50CH02_46339729	SL2.50CH02	46339729	0.092	0.95178	0.04822	0	0	0	0
916	SSL2.50CH02_46355139	SL2.50CH02	46355139	0.125	0.93308	0.06692	0	0	0	0
917	SSL2.50CH02_46479521	SL2.50CH02	46479521	0.179	0.90075	0.09925	0	0	0	0
918	SSL2.50CH02_46495113	SL2.50CH02	46495113	0.097	0.94975	0.02638	0.02387	0	0	0
919	SSL2.50CH02_46529030	SL2.50CH02	46529030	0.169	0.9068	0.0932	0	0	0	0
920	SSL2.50CH02_46589043	SL2.50CH02	46589043	0.022	0.98866	0.01134	0	0	0	0
921	SSL2.50CH02_46674263	SL2.50CH02	46674263	0.17	0.90602	0.09398	0	0	0	0
922	SSL2.50CH02_46779832	SL2.50CH02	46779832	0.175	0.90302	0.09698	0	0	0	0
923	SSL2.50CH02_46794999	SL2.50CH02	46794999	0.104	0.94486	0.05514	0	0	0	0
924	SSL2.50CH02_46810068	SL2.50CH02	46810068	0.107	0.94332	0.05668	0	0	0	0
925	SSL2.50CH02_46825133	SL2.50CH02	46825133	0.173	0.90428	0.09572	0	0	0	0
926	SSL2.50CH02_46966512	SL2.50CH02	46966512	0.134	0.92893	0.05711	0.01396	0	0	0
927	SSL2.50CH02_46981537	SL2.50CH02	46981537	0.137	0.92607	0.07393	0	0	0	0
928	SSL2.50CH02_46996649	SL2.50CH02	46996649	0.049	0.97487	0.02513	0	0	0	0
929	SSL2.50CH02_47011662	SL2.50CH02	47011662	0.177	0.90201	0.09799	0	0	0	0
930	SSL2.50CH02_47221052	SL2.50CH02	47221052	0.115	0.9386	0.0614	0	0	0	0
931	SSL2.50CH02_47240159	SL2.50CH02	47240159	0.059	0.9697	0.0303	0	0	0	0
932	SSL2.50CH02_47261758	SL2.50CH02	47261758	0.156	0.91479	0.08521	0	0	0	0
933	SSL2.50CH02_47277057	SL2.50CH02	47277057	0.141	0.92356	0.07644	0	0	0	0
934	SSL2.50CH02_47312849	SL2.50CH02	47312849	0.025	0.98744	0.01256	0	0	0	0
935	SSL2.50CH02_47383652	SL2.50CH02	47383652	0.03	0.98489	0.01511	0	0	0	0
936	SSL2.50CH02_47505008	SL2.50CH02	47505008	0.035	0.98237	0.01763	0	0	0	0
937	SSL2.50CH02_47520678	SL2.50CH02	47520678	0.19	0.89348	0.10652	0	0	0	0
938	SSL2.50CH02_47631165	SL2.50CH02	47631165	0.128	0.93108	0.06892	0	0	0	0
939	SSL2.50CH02_47690996	SL2.50CH02	47690996	0.032	0.98367	0.01633	0	0	0	0
940	SSL2.50CH02_47742357	SL2.50CH02	47742357	0.212	0.8797	0.1203	0	0	0	0
941	SSL2.50CH02_47778527	SL2.50CH02	47778527	0.057	0.97059	0.02941	0	0	0	0
942	SSL2.50CH02_47793996	SL2.50CH02	47793996	0.017	0.99121	0.00879	0	0	0	0
943	SSL2.50CH02_47809147	SL2.50CH02	47809147	0.047	0.97613	0.02261	0.00126	0	0	0
944	SSL2.50CH02_47840217	SL2.50CH02	47840217	0.054	0.97236	0.02764	0	0	0	0
945	SSL2.50CH02_47862035	SL2.50CH02	47862035	0.032	0.98363	0.01637	0	0	0	0
946	SSL2.50CH02_47904281	SL2.50CH02	47904281	0.025	0.98731	0.01269	0	0	0	0
947	SSL2.50CH02_47921187	SL2.50CH02	47921187	0.027	0.98618	0.01382	0	0	0	0
948	SSL2.50CH02_47936422	SL2.50CH02	47936422	0.066	0.96608	0.03392	0	0	0	0
949	SSL2.50CH02_47967033	SL2.50CH02	47967033	0.076	0.96106	0.02387	0.01508	0	0	0
950	SSL2.50CH02_48083716	SL2.50CH02	48083716	0.04	0.97943	0.02057	0	0	0	0
951	SSL2.50CH02_48117641	SL2.50CH02	48117641	0.154	0.91604	0.08396	0	0	0	0
952	SSL2.50CH02_48153631	SL2.50CH02	48153631	0.162	0.91332	0.05905	0.02764	0	0	0
953	SSL2.50CH02_48182023	SL2.50CH02	48182023	0.059	0.9697	0.0303	0	0	0	0
954	SSL2.50CH02_48316829	SL2.50CH02	48316829	0.233	0.86558	0.13442	0	0	0	0
955	SSL2.50CH02_48348978	SL2.50CH02	48348978	0.241	0.8602	0.1398	0	0	0	0
956	SSL2.50CH02_48383413	SL2.50CH02	48383413	0.106	0.94388	0.05612	0	0	0	0
957	SSL2.50CH02_48413618	SL2.50CH02	48413618	0.152	0.91709	0.08291	0	0	0	0
958	SSL2.50CH02_48430403	SL2.50CH02	48430403	0.173	0.90428	0.09572	0	0	0	0
959	SSL2.50CH02_48478630	SL2.50CH02	48478630	0.022	0.98872	0.01128	0	0	0	0
960	SSL2.50CH02_48636302	SL2.50CH02	48636302	0.037	0.9812	0.0188	0	0	0	0
961	SSL2.50CH02_48802859	SL2.50CH02	48802859	0.13	0.93003	0.06997	0	0	0	0
962	SSL2.50CH02_48846000	SL2.50CH02	48846000	0.189	0.89447	0.10553	0	0	0	0
963	SSL2.50CH02_49011408	SL2.50CH02	49011408	0.177	0.90176	0.09824	0	0	0	0
964	SSL2.50CH02_49031891	SL2.50CH02	49031891	0.056	0.97103	0.02897	0	0	0	0
965	SSL2.50CH02_49124844	SL2.50CH02	49124844	0.169	0.90704	0.09296	0	0	0	0
966	SSL2.50CH02_49157879	SL2.50CH02	49157879	0.183	0.89798	0.10202	0	0	0	0
967	SSL2.50CH02_49197592	SL2.50CH02	49197592	0.08	0.95812	0.04188	0	0	0	0
968	SSL2.50CH02_49247208	SL2.50CH02	49247208	0.035	0.98241	0.01759	0	0	0	0
969	SSL2.50CH02_49297295	SL2.50CH02	49297295	0.127	0.93199	0.06801	0	0	0	0
970	SSL2.50CH02_49328511	SL2.50CH02	49328511	0.129	0.9309	0.0691	0	0	0	0
971	SSL2.50CH02_49506160	SL2.50CH02	49506160	0.127	0.93199	0.06801	0	0	0	0
972	SSL2.50CH02_49536448	SL2.50CH02	49536448	0.113	0.9397	0.0603	0	0	0	0
973	SSL2.50CH02_49560514	SL2.50CH02	49560514	0.185	0.89698	0.10302	0	0	0	0
974	SSL2.50CH02_49591633	SL2.50CH02	49591633	0.177	0.90176	0.09824	0	0	0	0
975	SSL2.50CH02_49612514	SL2.50CH02	49612514	0.131	0.92949	0.07051	0	0	0	0
976	SSL2.50CH02_49645278	SL2.50CH02	49645278	0.186	0.89599	0.10401	0	0	0	0
977	SSL2.50CH02_49668598	SL2.50CH02	49668598	0.164	0.90977	0.09023	0	0	0	0
978	SSL2.50CH02_49683655	SL2.50CH02	49683655	0.129	0.9309	0.0691	0	0	0	0
979	SSL2.50CH02_49724127	SL2.50CH02	49724127	0.116	0.93955	0.03023	0.02267	0.00756	0	0
980	SSL2.50CH02_49739368	SL2.50CH02	49739368	0.091	0.95226	0.04774	0	0	0	0
981	SSL2.50CH02_49754488	SL2.50CH02	49754488	0.107	0.94347	0.05653	0	0	0	0
982	SSL2.50CH02_49891816	SL2.50CH02	49891816	0.015	0.99237	0.00763	0	0	0	0
983	SSL2.50CH02_50003139	SL2.50CH02	50003139	0.143	0.92278	0.07722	0	0	0	0
984	SSL2.50CH02_50033290	SL2.50CH02	50033290	0.158	0.91353	0.08647	0	0	0	0
985	SSL2.50CH02_50048307	SL2.50CH02	50048307	0.187	0.89573	0.10427	0	0	0	0
986	SSL2.50CH02_50065602	SL2.50CH02	50065602	0.015	0.99241	0.00759	0	0	0	0
987	SSL2.50CH02_50213158	SL2.50CH02	50213158	0.171	0.90578	0.09422	0	0	0	0
988	SSL2.50CH02_50254817	SL2.50CH02	50254817	0.015	0.99244	0.00756	0	0	0	0
989	SSL2.50CH02_50499308	SL2.50CH02	50499308	0.109	0.94207	0.05793	0	0	0	0
990	SSL2.50CH02_50626341	SL2.50CH02	50626341	0.183	0.89824	0.10176	0	0	0	0
991	SSL2.50CH02_50656769	SL2.50CH02	50656769	0.039	0.97995	0.02005	0	0	0	0
992	SSL2.50CH02_50706877	SL2.50CH02	50706877	0.163	0.91058	0.08942	0	0	0	0
993	SSL2.50CH02_50723827	SL2.50CH02	50723827	0.127	0.93199	0.06801	0	0	0	0
994	SSL2.50CH02_50807815	SL2.50CH02	50807815	0.174	0.90351	0.09649	0	0	0	0
995	SSL2.50CH02_50842083	SL2.50CH02	50842083	0.03	0.98481	0.01519	0	0	0	0
996	SSL2.50CH02_50859728	SL2.50CH02	50859728	0.051	0.97362	0.02638	0	0	0	0
997	SSL2.50CH02_51130940	SL2.50CH02	51130940	0.175	0.90327	0.09673	0	0	0	0
998	SSL2.50CH02_51214652	SL2.50CH02	51214652	0.124	0.93342	0.06658	0	0	0	0
999	SSL2.50CH02_51266073	SL2.50CH02	51266073	0.173	0.90428	0.09572	0	0	0	0
1000	SSL2.50CH02_51376722	SL2.50CH02	51376722	0.047	0.97589	0.02411	0	0	0	0
1001	SSL2.50CH02_51465390	SL2.50CH02	51465390	0.152	0.91729	0.08271	0	0	0	0
1002	SSL2.50CH02_51502434	SL2.50CH02	51502434	0.175	0.90327	0.09673	0	0	0	0
1003	SSL2.50CH02_51526764	SL2.50CH02	51526764	0.16	0.91228	0.08772	0	0	0	0
1004	SSL2.50CH02_51571282	SL2.50CH02	51571282	0.095	0.95026	0.04974	0	0	0	0
1005	SSL2.50CH02_51645024	SL2.50CH02	51645024	0.066	0.96582	0.03418	0	0	0	0
1006	SSL2.50CH02_51750447	SL2.50CH02	51750447	0.168	0.90727	0.09273	0	0	0	0
1007	SSL2.50CH02_51781124	SL2.50CH02	51781124	0.159	0.9131	0.08438	0.00252	0	0	0
1008	SSL2.50CH02_51813736	SL2.50CH02	51813736	0.17	0.90625	0.09375	0	0	0	0
1009	SSL2.50CH02_51878923	SL2.50CH02	51878923	0.096	0.94975	0.04774	0.00251	0	0	0
1010	SSL2.50CH02_51913911	SL2.50CH02	51913911	0.179	0.9005	0.0995	0	0	0	0
1011	SSL2.50CH02_51928952	SL2.50CH02	51928952	0.179	0.9005	0.0995	0	0	0	0
1012	SSL2.50CH02_51944260	SL2.50CH02	51944260	0.131	0.92965	0.07035	0	0	0	0
1013	SSL2.50CH02_51965542	SL2.50CH02	51965542	0.049	0.97487	0.02513	0	0	0	0
1014	SSL2.50CH02_51983369	SL2.50CH02	51983369	0.155	0.9154	0.0846	0	0	0	0
1015	SSL2.50CH02_52053556	SL2.50CH02	52053556	0.027	0.98615	0.01385	0	0	0	0
1016	SSL2.50CH02_52068601	SL2.50CH02	52068601	0.155	0.91562	0.08438	0	0	0	0
1017	SSL2.50CH02_52111883	SL2.50CH02	52111883	0.091	0.95214	0.04786	0	0	0	0
1018	SSL2.50CH02_52127149	SL2.50CH02	52127149	0.189	0.89421	0.10579	0	0	0	0
1019	SSL2.50CH02_52145608	SL2.50CH02	52145608	0.093	0.95101	0.04899	0	0	0	0
1020	SSL2.50CH02_52179351	SL2.50CH02	52179351	0.154	0.91604	0.08396	0	0	0	0
1021	SSL2.50CH02_52286625	SL2.50CH02	52286625	0.122	0.93467	0.06533	0	0	0	0
1022	SSL2.50CH02_52302427	SL2.50CH02	52302427	0.075	0.96076	0.03924	0	0	0	0
1023	SSL2.50CH02_52320699	SL2.50CH02	52320699	0.175	0.90327	0.09673	0	0	0	0
1024	SSL2.50CH02_52335894	SL2.50CH02	52335894	0.051	0.97375	0.02625	0	0	0	0
1025	SSL2.50CH02_52358583	SL2.50CH02	52358583	0.084	0.95603	0.04397	0	0	0	0
1026	SSL2.50CH02_52374310	SL2.50CH02	52374310	0.105	0.94416	0.05584	0	0	0	0
1027	SSL2.50CH02_52393406	SL2.50CH02	52393406	0.102	0.94612	0.05388	0	0	0	0
1028	SSL2.50CH02_52413919	SL2.50CH02	52413919	0.152	0.91709	0.08291	0	0	0	0
1029	SSL2.50CH02_52433042	SL2.50CH02	52433042	0.058	0.96992	0.03008	0	0	0	0
1030	SSL2.50CH02_52466978	SL2.50CH02	52466978	0.183	0.89824	0.10176	0	0	0	0
1031	SSL2.50CH02_52515576	SL2.50CH02	52515576	0.144	0.92211	0.07789	0	0	0	0
1032	SSL2.50CH02_52741013	SL2.50CH02	52741013	0.172	0.90476	0.09524	0	0	0	0
1033	SSL2.50CH02_52780193	SL2.50CH02	52780193	0.051	0.97362	0.02638	0	0	0	0
1034	SSL2.50CH02_52827951	SL2.50CH02	52827951	0.103	0.94557	0.05443	0	0	0	0
1035	SSL2.50CH02_52864338	SL2.50CH02	52864338	0.107	0.94304	0.05696	0	0	0	0
1036	SSL2.50CH02_52957834	SL2.50CH02	52957834	0.061	0.96867	0.03133	0	0	0	0
1037	SSL2.50CH02_52977509	SL2.50CH02	52977509	0.141	0.92356	0.07519	0.00125	0	0	0
1038	SSL2.50CH02_52999692	SL2.50CH02	52999692	0.143	0.92231	0.07769	0	0	0	0
1039	SSL2.50CH02_53060865	SL2.50CH02	53060865	0.128	0.93108	0.06892	0	0	0	0
1040	SSL2.50CH02_53119376	SL2.50CH02	53119376	0.188	0.89474	0.10526	0	0	0	0
1041	SSL2.50CH02_53134572	SL2.50CH02	53134572	0.16	0.91206	0.08794	0	0	0	0
1042	SSL2.50CH02_53178277	SL2.50CH02	53178277	0.084	0.9563	0.0437	0	0	0	0
1043	SSL2.50CH02_53239919	SL2.50CH02	53239919	0.066	0.96599	0.03401	0	0	0	0
1044	SSL2.50CH02_53293381	SL2.50CH02	53293381	0.443	0.66835	0.33165	0	0	0	0
1045	SSL2.50CH02_53323720	SL2.50CH02	53323720	0.128	0.93112	0.06888	0	0	0	0
1046	SSL2.50CH02_53394985	SL2.50CH02	53394985	0.446	0.66499	0.33501	0	0	0	0
1047	SSL2.50CH02_53474563	SL2.50CH02	53474563	0.092	0.95153	0.04847	0	0	0	0
1048	SSL2.50CH02_53570427	SL2.50CH02	53570427	0.047	0.97613	0.02387	0	0	0	0
1049	SSL2.50CH02_53718785	SL2.50CH02	53718785	0.093	0.95202	0.0303	0.01136	0.00631	0	0
1050	SSL2.50CH02_53750193	SL2.50CH02	53750193	0.135	0.92695	0.07305	0	0	0	0
1051	SSL2.50CH02_53807036	SL2.50CH02	53807036	0.171	0.90578	0.09422	0	0	0	0
1052	SSL2.50CH02_53826295	SL2.50CH02	53826295	0.144	0.92172	0.07828	0	0	0	0
1053	SSL2.50CH02_53874153	SL2.50CH02	53874153	0.157	0.91436	0.08564	0	0	0	0
1054	SSL2.50CH02_53954746	SL2.50CH02	53954746	0.162	0.91103	0.08897	0	0	0	0
1055	SSL2.50CH02_53970280	SL2.50CH02	53970280	0.091	0.95238	0.04762	0	0	0	0
1056	SSL2.50CH02_54014872	SL2.50CH02	54014872	0.17	0.90602	0.09398	0	0	0	0
1057	SSL2.50CH02_54030635	SL2.50CH02	54030635	0.102	0.94598	0.05402	0	0	0	0
1058	SSL2.50CH02_54078237	SL2.50CH02	54078237	0.181	0.8995	0.1005	0	0	0	0
1059	SSL2.50CH02_54118621	SL2.50CH02	54118621	0.455	0.67211	0.30528	0.02261	0	0	0
1060	SSL2.50CH02_54243303	SL2.50CH02	54243303	0.152	0.91729	0.08271	0	0	0	0
1061	SSL2.50CH02_54289526	SL2.50CH02	54289526	0.077	0.9598	0.0402	0	0	0	0
1062	SSL2.50CH02_54315863	SL2.50CH02	54315863	0.116	0.93814	0.06186	0	0	0	0
1063	SSL2.50CH02_54331908	SL2.50CH02	54331908	0.49	0.57179	0.42821	0	0	0	0
1064	SSL2.50CH02_54347001	SL2.50CH02	54347001	0.109	0.94221	0.05779	0	0	0	0
1065	SSL2.50CH02_54377641	SL2.50CH02	54377641	0.145	0.92125	0.07875	0	0	0	0
1066	SSL2.50CH02_54393996	SL2.50CH02	54393996	0.16	0.91228	0.08772	0	0	0	0
1067	SSL2.50CH02_54417007	SL2.50CH02	54417007	0.186	0.89599	0.10401	0	0	0	0
1068	SSL2.50CH02_54449206	SL2.50CH02	54449206	0.176	0.90226	0.09774	0	0	0	0
1069	SSL2.50CH02_54533905	SL2.50CH02	54533905	0.166	0.90852	0.09148	0	0	0	0
1070	SSL2.50CH02_54642072	SL2.50CH02	54642072	0.13	0.93038	0.06962	0	0	0	0
1071	SSL2.50CH02_54657985	SL2.50CH02	54657985	0.175	0.90327	0.09673	0	0	0	0
1072	SSL2.50CH02_54715407	SL2.50CH02	54715407	0.176	0.90226	0.09774	0	0	0	0
1073	SSL2.50CH02_54747405	SL2.50CH02	54747405	0.164	0.91	0.09	0	0	0	0
1074	SSL2.50CH02_54777664	SL2.50CH02	54777664	0.045	0.97715	0.02285	0	0	0	0
1075	SSL2.50CH02_54957385	SL2.50CH02	54957385	0.167	0.90806	0.09194	0	0	0	0
1076	SSL2.50CH02_55048558	SL2.50CH02	55048558	0.175	0.90327	0.09673	0	0	0	0
1077	SSL2.50CH02_55063585	SL2.50CH02	55063585	0.152	0.91688	0.08312	0	0	0	0
1078	SSL2.50CH02_55136683	SL2.50CH02	55136683	0.077	0.9597	0.0403	0	0	0	0
1079	SSL2.50CH02_55233115	SL2.50CH02	55233115	0.159	0.9131	0.0869	0	0	0	0
1080	SSL2.50CH02_55255351	SL2.50CH02	55255351	0.119	0.93671	0.06329	0	0	0	0
1081	SSL2.50CH03_19706	SL2.50CH03	19706	0.189	0.89447	0.10553	0	0	0	0
1082	SSL2.50CH03_85201	SL2.50CH03	85201	0.065	0.96617	0.03383	0	0	0	0
1083	SSL2.50CH03_165770	SL2.50CH03	165770	0.189	0.89447	0.10553	0	0	0	0
1084	SSL2.50CH03_181737	SL2.50CH03	181737	0.179	0.90075	0.09925	0	0	0	0
1085	SSL2.50CH03_274057	SL2.50CH03	274057	0.02	0.9899	0.0101	0	0	0	0
1086	SSL2.50CH03_366686	SL2.50CH03	366686	0.01	0.99499	0.00501	0	0	0	0
1087	SSL2.50CH03_454406	SL2.50CH03	454406	0.01	0.99497	0.00503	0	0	0	0
1088	SSL2.50CH03_470256	SL2.50CH03	470256	0.046	0.97668	0.02332	0	0	0	0
1089	SSL2.50CH03_502249	SL2.50CH03	502249	0.013	0.9937	0.0063	0	0	0	0
1090	SSL2.50CH03_517647	SL2.50CH03	517647	0.047	0.97595	0.02405	0	0	0	0
1091	SSL2.50CH03_565012	SL2.50CH03	565012	0.186	0.89599	0.10401	0	0	0	0
1092	SSL2.50CH03_684532	SL2.50CH03	684532	0.015	0.99248	0.00752	0	0	0	0
1093	SSL2.50CH03_712159	SL2.50CH03	712159	0.082	0.95739	0.04261	0	0	0	0
1094	SSL2.50CH03_791669	SL2.50CH03	791669	0.123	0.93434	0.06566	0	0	0	0
1095	SSL2.50CH03_809859	SL2.50CH03	809859	0.015	0.99235	0.00765	0	0	0	0
1096	SSL2.50CH03_848523	SL2.50CH03	848523	0.077	0.9599	0.03759	0.00251	0	0	0
1097	SSL2.50CH03_910747	SL2.50CH03	910747	0.142	0.92337	0.07663	0	0	0	0
1098	SSL2.50CH03_976996	SL2.50CH03	976996	0.155	0.91562	0.08438	0	0	0	0
1099	SSL2.50CH03_1029472	SL2.50CH03	1029472	0.365	0.76005	0.23995	0	0	0	0
1100	SSL2.50CH03_1061858	SL2.50CH03	1061858	0.255	0.85013	0.14987	0	0	0	0
1101	SSL2.50CH03_1107365	SL2.50CH03	1107365	0.054	0.97243	0.02757	0	0	0	0
1102	SSL2.50CH03_1190891	SL2.50CH03	1190891	0.116	0.93844	0.06156	0	0	0	0
1103	SSL2.50CH03_1278461	SL2.50CH03	1278461	0.135	0.92714	0.07286	0	0	0	0
1104	SSL2.50CH03_1294103	SL2.50CH03	1294103	0.12	0.9359	0.0641	0	0	0	0
1105	SSL2.50CH03_1309155	SL2.50CH03	1309155	0.438	0.67632	0.32368	0	0	0	0
1106	SSL2.50CH03_1354399	SL2.50CH03	1354399	0.049	0.97487	0.02513	0	0	0	0
1107	SSL2.50CH03_1384995	SL2.50CH03	1384995	0.16	0.91206	0.08794	0	0	0	0
1108	SSL2.50CH03_1408613	SL2.50CH03	1408613	0.059	0.96931	0.03069	0	0	0	0
1109	SSL2.50CH03_1488062	SL2.50CH03	1488062	0.48	0.60076	0.39924	0	0	0	0
1110	SSL2.50CH03_1556704	SL2.50CH03	1556704	0.171	0.90554	0.09446	0	0	0	0
1111	SSL2.50CH03_1613597	SL2.50CH03	1613597	0.049	0.97475	0.02525	0	0	0	0
1112	SSL2.50CH03_1631574	SL2.50CH03	1631574	0.167	0.90829	0.09171	0	0	0	0
1113	SSL2.50CH03_1664889	SL2.50CH03	1664889	0.015	0.99246	0.00754	0	0	0	0
1114	SSL2.50CH03_1682061	SL2.50CH03	1682061	0.013	0.99362	0.00638	0	0	0	0
1115	SSL2.50CH03_1746202	SL2.50CH03	1746202	0.148	0.9194	0.0806	0	0	0	0
1116	SSL2.50CH03_1845858	SL2.50CH03	1845858	0.155	0.91562	0.08438	0	0	0	0
1117	SSL2.50CH03_1882203	SL2.50CH03	1882203	0.049	0.97494	0.02506	0	0	0	0
1118	SSL2.50CH03_1967633	SL2.50CH03	1967633	0.142	0.92317	0.07683	0	0	0	0
1119	SSL2.50CH03_2071126	SL2.50CH03	2071126	0.481	0.59824	0.40176	0	0	0	0
1120	SSL2.50CH03_2087310	SL2.50CH03	2087310	0.481	0.59673	0.40327	0	0	0	0
1121	SSL2.50CH03_2151817	SL2.50CH03	2151817	0.125	0.93291	0.06709	0	0	0	0
1122	SSL2.50CH03_2166823	SL2.50CH03	2166823	0.081	0.9575	0.0425	0	0	0	0
1123	SSL2.50CH03_2271340	SL2.50CH03	2271340	0.142	0.92317	0.07683	0	0	0	0
1124	SSL2.50CH03_2457498	SL2.50CH03	2457498	0.112	0.94066	0.05934	0	0	0	0
1125	SSL2.50CH03_2626441	SL2.50CH03	2626441	0.118	0.93719	0.06281	0	0	0	0
1126	SSL2.50CH03_2715438	SL2.50CH03	2715438	0.163	0.91058	0.08942	0	0	0	0
1127	SSL2.50CH03_2878334	SL2.50CH03	2878334	0.13	0.93	0.07	0	0	0	0
1128	SSL2.50CH03_2960506	SL2.50CH03	2960506	0.109	0.94216	0.05784	0	0	0	0
1129	SSL2.50CH03_3029442	SL2.50CH03	3029442	0.129	0.9309	0.0691	0	0	0	0
1130	SSL2.50CH03_3137939	SL2.50CH03	3137939	0.194	0.89098	0.10902	0	0	0	0
1131	SSL2.50CH03_3239181	SL2.50CH03	3239181	0.008	0.99623	0.00377	0	0	0	0
1132	SSL2.50CH03_3277553	SL2.50CH03	3277553	0.155	0.91562	0.08438	0	0	0	0
1133	SSL2.50CH03_3395079	SL2.50CH03	3395079	0.01	0.99497	0.00503	0	0	0	0
1134	SSL2.50CH03_3430691	SL2.50CH03	3430691	0.148	0.9196	0.0804	0	0	0	0
1135	SSL2.50CH03_3507531	SL2.50CH03	3507531	0.066	0.96591	0.03409	0	0	0	0
1136	SSL2.50CH03_3547067	SL2.50CH03	3547067	0.386	0.73852	0.26148	0	0	0	0
1137	SSL2.50CH03_3577182	SL2.50CH03	3577182	0.165	0.90932	0.09068	0	0	0	0
1138	SSL2.50CH03_3847668	SL2.50CH03	3847668	0.062	0.96819	0.03181	0	0	0	0
1139	SSL2.50CH03_4144097	SL2.50CH03	4144097	0.073	0.96193	0.03807	0	0	0	0
1140	SSL2.50CH03_4165185	SL2.50CH03	4165185	0.022	0.98869	0.01131	0	0	0	0
1141	SSL2.50CH03_4300121	SL2.50CH03	4300121	0.135	0.92695	0.07305	0	0	0	0
1142	SSL2.50CH03_4428396	SL2.50CH03	4428396	0.467	0.6294	0.3706	0	0	0	0
1143	SSL2.50CH03_4501524	SL2.50CH03	4501524	0.126	0.93257	0.06743	0	0	0	0
1144	SSL2.50CH03_4536304	SL2.50CH03	4536304	0.155	0.9154	0.0846	0	0	0	0
1145	SSL2.50CH03_4557613	SL2.50CH03	4557613	0.17	0.90602	0.09398	0	0	0	0
1146	SSL2.50CH03_4584530	SL2.50CH03	4584530	0.495	0.54912	0.45088	0	0	0	0
1147	SSL2.50CH03_4618900	SL2.50CH03	4618900	0.17	0.90602	0.09398	0	0	0	0
1148	SSL2.50CH03_4636328	SL2.50CH03	4636328	0.129	0.93095	0.06905	0	0	0	0
1149	SSL2.50CH03_4675185	SL2.50CH03	4675185	0.169	0.90704	0.09296	0	0	0	0
1150	SSL2.50CH03_4930632	SL2.50CH03	4930632	0.117	0.93734	0.06266	0	0	0	0
1151	SSL2.50CH03_5048075	SL2.50CH03	5048075	0.485	0.58794	0.41206	0	0	0	0
1152	SSL2.50CH03_5065713	SL2.50CH03	5065713	0.131	0.92982	0.07018	0	0	0	0
1153	SSL2.50CH03_5200497	SL2.50CH03	5200497	0.399	0.72449	0.27551	0	0	0	0
1154	SSL2.50CH03_5275091	SL2.50CH03	5275091	0.188	0.89494	0.10506	0	0	0	0
1155	SSL2.50CH03_5455983	SL2.50CH03	5455983	0.34	0.78283	0.21717	0	0	0	0
1156	SSL2.50CH03_5677582	SL2.50CH03	5677582	0.101	0.94656	0.05344	0	0	0	0
1157	SSL2.50CH03_5726070	SL2.50CH03	5726070	0.159	0.9131	0.0869	0	0	0	0
1158	SSL2.50CH03_5751131	SL2.50CH03	5751131	0.047	0.97613	0.02387	0	0	0	0
1159	SSL2.50CH03_5843884	SL2.50CH03	5843884	0.148	0.9198	0.0802	0	0	0	0
1160	SSL2.50CH03_6247889	SL2.50CH03	6247889	0.167	0.90806	0.09194	0	0	0	0
1161	SSL2.50CH03_6365063	SL2.50CH03	6365063	0.15	0.91814	0.08186	0	0	0	0
1162	SSL2.50CH03_7099853	SL2.50CH03	7099853	0.139	0.92462	0.07538	0	0	0	0
1163	SSL2.50CH03_7271148	SL2.50CH03	7271148	0.151	0.91779	0.08221	0	0	0	0
1164	SSL2.50CH03_7297726	SL2.50CH03	7297726	0.158	0.91562	0.0466	0.03778	0	0	0
1165	SSL2.50CH03_7337020	SL2.50CH03	7337020	0.027	0.98622	0.01378	0	0	0	0
1166	SSL2.50CH03_7511611	SL2.50CH03	7511611	0.134	0.92803	0.07071	0.00126	0	0	0
1167	SSL2.50CH03_7744013	SL2.50CH03	7744013	0.12	0.93577	0.06423	0	0	0	0
1168	SSL2.50CH03_7760930	SL2.50CH03	7760930	0.374	0.75064	0.24936	0	0	0	0
1169	SSL2.50CH03_8039617	SL2.50CH03	8039617	0.146	0.92065	0.07935	0	0	0	0
1170	SSL2.50CH03_8558005	SL2.50CH03	8558005	0.117	0.93782	0.05829	0.00389	0	0	0
1171	SSL2.50CH03_8587138	SL2.50CH03	8587138	0.152	0.91729	0.08271	0	0	0	0
1172	SSL2.50CH03_8604232	SL2.50CH03	8604232	0.01	0.99499	0.00501	0	0	0	0
1173	SSL2.50CH03_8777768	SL2.50CH03	8777768	0.01	0.99492	0.00508	0	0	0	0
1174	SSL2.50CH03_8859543	SL2.50CH03	8859543	0.159	0.9131	0.0869	0	0	0	0
1175	SSL2.50CH03_8910799	SL2.50CH03	8910799	0.171	0.90578	0.09422	0	0	0	0
1176	SSL2.50CH03_8964027	SL2.50CH03	8964027	0.01	0.99499	0.00501	0	0	0	0
1177	SSL2.50CH03_9342823	SL2.50CH03	9342823	0.013	0.99369	0.00631	0	0	0	0
1178	SSL2.50CH03_9559311	SL2.50CH03	9559311	0.01	0.99491	0.00509	0	0	0	0
1179	SSL2.50CH03_9937819	SL2.50CH03	9937819	0.171	0.90578	0.09422	0	0	0	0
1180	SSL2.50CH03_10213371	SL2.50CH03	10213371	0.01	0.99499	0.00501	0	0	0	0
1181	SSL2.50CH03_10249432	SL2.50CH03	10249432	0.01	0.99497	0.00503	0	0	0	0
1182	SSL2.50CH03_11362494	SL2.50CH03	11362494	0.167	0.90806	0.09194	0	0	0	0
1183	SSL2.50CH03_11496093	SL2.50CH03	11496093	0.1	0.9471	0.0529	0	0	0	0
1184	SSL2.50CH03_11589477	SL2.50CH03	11589477	0.01	0.99496	0.00504	0	0	0	0
1185	SSL2.50CH03_11628935	SL2.50CH03	11628935	0.01	0.99496	0.00504	0	0	0	0
1186	SSL2.50CH03_12295268	SL2.50CH03	12295268	0.01	0.99494	0.00506	0	0	0	0
1187	SSL2.50CH03_12570153	SL2.50CH03	12570153	0.159	0.9131	0.0869	0	0	0	0
1188	SSL2.50CH03_12912648	SL2.50CH03	12912648	0.171	0.90578	0.09422	0	0	0	0
1189	SSL2.50CH03_18494612	SL2.50CH03	18494612	0.157	0.91436	0.08564	0	0	0	0
1190	SSL2.50CH03_18592586	SL2.50CH03	18592586	0.092	0.95178	0.04822	0	0	0	0
1191	SSL2.50CH03_18909015	SL2.50CH03	18909015	0.469	0.62469	0.37531	0	0	0	0
1192	SSL2.50CH03_20750742	SL2.50CH03	20750742	0.075	0.96106	0.03894	0	0	0	0
1193	SSL2.50CH03_21149833	SL2.50CH03	21149833	0.168	0.90727	0.09273	0	0	0	0
1194	SSL2.50CH03_21427337	SL2.50CH03	21427337	0.167	0.90806	0.09194	0	0	0	0
1195	SSL2.50CH03_21535759	SL2.50CH03	21535759	0.01	0.99496	0.00504	0	0	0	0
1196	SSL2.50CH03_22034034	SL2.50CH03	22034034	0.01	0.99499	0.00501	0	0	0	0
1197	SSL2.50CH03_24541191	SL2.50CH03	24541191	0.03	0.98477	0.01523	0	0	0	0
1198	SSL2.50CH03_24823678	SL2.50CH03	24823678	0.01	0.99496	0.00504	0	0	0	0
1199	SSL2.50CH03_25994520	SL2.50CH03	25994520	0.1	0.94724	0.05276	0	0	0	0
1200	SSL2.50CH03_26998613	SL2.50CH03	26998613	0.15	0.91855	0.08145	0	0	0	0
1201	SSL2.50CH03_27021067	SL2.50CH03	27021067	0.177	0.90201	0.09799	0	0	0	0
1202	SSL2.50CH03_27231568	SL2.50CH03	27231568	0.01	0.99496	0.00504	0	0	0	0
1203	SSL2.50CH03_27263376	SL2.50CH03	27263376	0.111	0.94103	0.05897	0	0	0	0
1204	SSL2.50CH03_27570027	SL2.50CH03	27570027	0.01	0.99497	0.00503	0	0	0	0
1205	SSL2.50CH03_27857979	SL2.50CH03	27857979	0.158	0.91353	0.08647	0	0	0	0
1206	SSL2.50CH03_28175366	SL2.50CH03	28175366	0.154	0.91604	0.08396	0	0	0	0
1207	SSL2.50CH03_28511493	SL2.50CH03	28511493	0.098	0.94819	0.05181	0	0	0	0
1208	SSL2.50CH03_28645216	SL2.50CH03	28645216	0.089	0.95352	0.04648	0	0	0	0
1209	SSL2.50CH03_28716393	SL2.50CH03	28716393	0.089	0.95328	0.04672	0	0	0	0
1210	SSL2.50CH03_29010162	SL2.50CH03	29010162	0.155	0.9154	0.0846	0	0	0	0
1211	SSL2.50CH03_29682626	SL2.50CH03	29682626	0.089	0.95352	0.04648	0	0	0	0
1212	SSL2.50CH03_29791345	SL2.50CH03	29791345	0.13	0.93003	0.06997	0	0	0	0
1213	SSL2.50CH03_30155090	SL2.50CH03	30155090	0.01	0.99497	0.00503	0	0	0	0
1214	SSL2.50CH03_30265823	SL2.50CH03	30265823	0.105	0.94416	0.05584	0	0	0	0
1215	SSL2.50CH03_31640444	SL2.50CH03	31640444	0.16	0.91206	0.08794	0	0	0	0
1216	SSL2.50CH03_31685179	SL2.50CH03	31685179	0.117	0.9375	0.0625	0	0	0	0
1217	SSL2.50CH03_32058224	SL2.50CH03	32058224	0.089	0.9534	0.0466	0	0	0	0
1218	SSL2.50CH03_32262151	SL2.50CH03	32262151	0.129	0.93073	0.06927	0	0	0	0
1219	SSL2.50CH03_32328444	SL2.50CH03	32328444	0.164	0.90977	0.09023	0	0	0	0
1220	SSL2.50CH03_33238921	SL2.50CH03	33238921	0.171	0.90578	0.09422	0	0	0	0
1221	SSL2.50CH03_33485728	SL2.50CH03	33485728	0.094	0.95038	0.04962	0	0	0	0
1222	SSL2.50CH03_33517920	SL2.50CH03	33517920	0.124	0.93384	0.06616	0	0	0	0
1223	SSL2.50CH03_33662417	SL2.50CH03	33662417	0.171	0.90578	0.09422	0	0	0	0
1224	SSL2.50CH03_33956120	SL2.50CH03	33956120	0.17	0.90727	0.0802	0.01253	0	0	0
1225	SSL2.50CH03_34362376	SL2.50CH03	34362376	0.01	0.99496	0.00504	0	0	0	0
1226	SSL2.50CH03_34552150	SL2.50CH03	34552150	0.132	0.92893	0.07107	0	0	0	0
1227	SSL2.50CH03_34870082	SL2.50CH03	34870082	0.166	0.90852	0.09148	0	0	0	0
1228	SSL2.50CH03_34926523	SL2.50CH03	34926523	0.127	0.93199	0.06801	0	0	0	0
1229	SSL2.50CH03_35345109	SL2.50CH03	35345109	0.141	0.92356	0.07644	0	0	0	0
1230	SSL2.50CH03_35515151	SL2.50CH03	35515151	0.167	0.90829	0.09171	0	0	0	0
1231	SSL2.50CH03_35649715	SL2.50CH03	35649715	0.093	0.95088	0.04912	0	0	0	0
1232	SSL2.50CH03_35735530	SL2.50CH03	35735530	0.168	0.90727	0.09273	0	0	0	0
1233	SSL2.50CH03_37238475	SL2.50CH03	37238475	0.129	0.93056	0.06944	0	0	0	0
1234	SSL2.50CH03_39176224	SL2.50CH03	39176224	0.16	0.91228	0.08772	0	0	0	0
1235	SSL2.50CH03_41011590	SL2.50CH03	41011590	0.084	0.95603	0.04397	0	0	0	0
1236	SSL2.50CH03_42988102	SL2.50CH03	42988102	0.165	0.90955	0.09045	0	0	0	0
1237	SSL2.50CH03_44511396	SL2.50CH03	44511396	0.084	0.95581	0.04419	0	0	0	0
1238	SSL2.50CH03_47050803	SL2.50CH03	47050803	0.091	0.95214	0.04786	0	0	0	0
1239	SSL2.50CH03_47496852	SL2.50CH03	47496852	0.172	0.90554	0.09194	0.00252	0	0	0
1240	SSL2.50CH03_48527949	SL2.50CH03	48527949	0.152	0.91709	0.08291	0	0	0	0
1241	SSL2.50CH03_48637783	SL2.50CH03	48637783	0.168	0.90829	0.0804	0.01131	0	0	0
1242	SSL2.50CH03_50043856	SL2.50CH03	50043856	0.108	0.9426	0.0574	0	0	0	0
1243	SSL2.50CH03_50127938	SL2.50CH03	50127938	0.142	0.92317	0.07683	0	0	0	0
1244	SSL2.50CH03_50192877	SL2.50CH03	50192877	0.01	0.99497	0.00503	0	0	0	0
1245	SSL2.50CH03_50322874	SL2.50CH03	50322874	0.172	0.90476	0.09524	0	0	0	0
1246	SSL2.50CH03_50564307	SL2.50CH03	50564307	0.161	0.91184	0.08816	0	0	0	0
1247	SSL2.50CH03_50676783	SL2.50CH03	50676783	0.152	0.91709	0.08291	0	0	0	0
1248	SSL2.50CH03_50918183	SL2.50CH03	50918183	0.143	0.92231	0.07769	0	0	0	0
1249	SSL2.50CH03_51175610	SL2.50CH03	51175610	0.063	0.9677	0.0323	0	0	0	0
1250	SSL2.50CH03_51259971	SL2.50CH03	51259971	0.01	0.99497	0.00503	0	0	0	0
1251	SSL2.50CH03_51488900	SL2.50CH03	51488900	0.171	0.90578	0.09422	0	0	0	0
1252	SSL2.50CH03_51595447	SL2.50CH03	51595447	0.13	0.9302	0.0698	0	0	0	0
1253	SSL2.50CH03_51751060	SL2.50CH03	51751060	0.135	0.92714	0.07286	0	0	0	0
1254	SSL2.50CH03_51788095	SL2.50CH03	51788095	0.467	0.6294	0.3706	0	0	0	0
1255	SSL2.50CH03_51897465	SL2.50CH03	51897465	0.073	0.96231	0.03769	0	0	0	0
1256	SSL2.50CH03_51960290	SL2.50CH03	51960290	0.144	0.92231	0.07143	0.00627	0	0	0
1257	SSL2.50CH03_52042581	SL2.50CH03	52042581	0.462	0.63728	0.36272	0	0	0	0
1258	SSL2.50CH03_52067205	SL2.50CH03	52067205	0.487	0.58145	0.41855	0	0	0	0
1259	SSL2.50CH03_52153309	SL2.50CH03	52153309	0.007	0.99624	0.00376	0	0	0	0
1260	SSL2.50CH03_52319395	SL2.50CH03	52319395	0.01	0.99497	0.00503	0	0	0	0
1261	SSL2.50CH03_52337962	SL2.50CH03	52337962	0.01	0.99497	0.00503	0	0	0	0
1262	SSL2.50CH03_52382005	SL2.50CH03	52382005	0.124	0.93342	0.06658	0	0	0	0
1263	SSL2.50CH03_52519478	SL2.50CH03	52519478	0.117	0.93766	0.06234	0	0	0	0
1264	SSL2.50CH03_52554366	SL2.50CH03	52554366	0.44	0.6738	0.3262	0	0	0	0
1265	SSL2.50CH03_52672870	SL2.50CH03	52672870	0.1	0.94744	0.05256	0	0	0	0
1266	SSL2.50CH03_52698401	SL2.50CH03	52698401	0.066	0.96608	0.03392	0	0	0	0
1267	SSL2.50CH03_52776235	SL2.50CH03	52776235	0.15	0.91855	0.08145	0	0	0	0
1268	SSL2.50CH03_52840198	SL2.50CH03	52840198	0.144	0.92172	0.07828	0	0	0	0
1269	SSL2.50CH03_52914960	SL2.50CH03	52914960	0.005	0.99749	0.00251	0	0	0	0
1270	SSL2.50CH03_53121369	SL2.50CH03	53121369	0.169	0.90704	0.09296	0	0	0	0
1271	SSL2.50CH03_53184617	SL2.50CH03	53184617	0.163	0.91184	0.07305	0.01511	0	0	0
1272	SSL2.50CH03_53217876	SL2.50CH03	53217876	0.165	0.90955	0.09045	0	0	0	0
1273	SSL2.50CH03_53426912	SL2.50CH03	53426912	0.16	0.91206	0.08794	0	0	0	0
1274	SSL2.50CH03_53465555	SL2.50CH03	53465555	0.125	0.93308	0.06692	0	0	0	0
1275	SSL2.50CH03_53548875	SL2.50CH03	53548875	0.152	0.91709	0.08291	0	0	0	0
1276	SSL2.50CH03_53644023	SL2.50CH03	53644023	0.26	0.84673	0.15327	0	0	0	0
1277	SSL2.50CH03_53825110	SL2.50CH03	53825110	0.152	0.91709	0.08291	0	0	0	0
1278	SSL2.50CH03_53896152	SL2.50CH03	53896152	0.07	0.96357	0.03643	0	0	0	0
1279	SSL2.50CH03_54267482	SL2.50CH03	54267482	0.103	0.94529	0.05471	0	0	0	0
1280	SSL2.50CH03_54353223	SL2.50CH03	54353223	0.165	0.90955	0.09045	0	0	0	0
1281	SSL2.50CH03_54383637	SL2.50CH03	54383637	0.135	0.92714	0.07286	0	0	0	0
1282	SSL2.50CH03_54431371	SL2.50CH03	54431371	0.287	0.8262	0.1738	0	0	0	0
1283	SSL2.50CH03_54485146	SL2.50CH03	54485146	0.319	0.80101	0.19899	0	0	0	0
1284	SSL2.50CH03_54746967	SL2.50CH03	54746967	0.204	0.88442	0.11558	0	0	0	0
1285	SSL2.50CH03_54834025	SL2.50CH03	54834025	0.139	0.92462	0.07538	0	0	0	0
1286	SSL2.50CH03_54872943	SL2.50CH03	54872943	0.03	0.98489	0.01511	0	0	0	0
1287	SSL2.50CH03_55272963	SL2.50CH03	55272963	0.068	0.96482	0.03518	0	0	0	0
1288	SSL2.50CH03_55533649	SL2.50CH03	55533649	0.066	0.96608	0.03392	0	0	0	0
1289	SSL2.50CH03_55612442	SL2.50CH03	55612442	0.23	0.86727	0.13273	0	0	0	0
1290	SSL2.50CH03_55691904	SL2.50CH03	55691904	0.167	0.90831	0.09169	0	0	0	0
1291	SSL2.50CH03_55746740	SL2.50CH03	55746740	0.095	0.95	0.05	0	0	0	0
1292	SSL2.50CH03_56171749	SL2.50CH03	56171749	0.16	0.91206	0.08794	0	0	0	0
1293	SSL2.50CH03_56188972	SL2.50CH03	56188972	0.354	0.77041	0.22832	0.00128	0	0	0
1294	SSL2.50CH03_56270400	SL2.50CH03	56270400	0.344	0.7796	0.2204	0	0	0	0
1295	SSL2.50CH03_56332347	SL2.50CH03	56332347	0.179	0.9005	0.0995	0	0	0	0
1296	SSL2.50CH03_56568805	SL2.50CH03	56568805	0.144	0.92211	0.07789	0	0	0	0
1297	SSL2.50CH03_56592085	SL2.50CH03	56592085	0.141	0.92386	0.07614	0	0	0	0
1298	SSL2.50CH03_56623766	SL2.50CH03	56623766	0.127	0.93199	0.06801	0	0	0	0
1299	SSL2.50CH03_56791307	SL2.50CH03	56791307	0.075	0.96106	0.03894	0	0	0	0
1300	SSL2.50CH03_57036787	SL2.50CH03	57036787	0.144	0.92211	0.07789	0	0	0	0
1301	SSL2.50CH03_57528894	SL2.50CH03	57528894	0.119	0.93671	0.06329	0	0	0	0
1302	SSL2.50CH03_57798667	SL2.50CH03	57798667	0.163	0.91057	0.08943	0	0	0	0
1303	SSL2.50CH03_58396015	SL2.50CH03	58396015	0.062	0.96811	0.03189	0	0	0	0
1304	SSL2.50CH03_58428063	SL2.50CH03	58428063	0.21	0.88065	0.11935	0	0	0	0
1305	SSL2.50CH03_58463358	SL2.50CH03	58463358	0.15	0.91855	0.08145	0	0	0	0
1306	SSL2.50CH03_58541376	SL2.50CH03	58541376	0.21	0.88095	0.11905	0	0	0	0
1307	SSL2.50CH03_58833330	SL2.50CH03	58833330	0.1	0.9471	0.0529	0	0	0	0
1308	SSL2.50CH03_58890484	SL2.50CH03	58890484	0.066	0.96608	0.03392	0	0	0	0
1309	SSL2.50CH03_58951948	SL2.50CH03	58951948	0.15	0.91834	0.08166	0	0	0	0
1310	SSL2.50CH03_58993183	SL2.50CH03	58993183	0.145	0.92105	0.07895	0	0	0	0
1311	SSL2.50CH03_59132202	SL2.50CH03	59132202	0.15	0.91834	0.08166	0	0	0	0
1312	SSL2.50CH03_59246440	SL2.50CH03	59246440	0.165	0.90955	0.09045	0	0	0	0
1313	SSL2.50CH03_59262134	SL2.50CH03	59262134	0.145	0.92152	0.07848	0	0	0	0
1314	SSL2.50CH03_59317099	SL2.50CH03	59317099	0.167	0.90829	0.09171	0	0	0	0
1315	SSL2.50CH03_59356024	SL2.50CH03	59356024	0.164	0.90977	0.09023	0	0	0	0
1316	SSL2.50CH03_59428178	SL2.50CH03	59428178	0.08	0.95812	0.04188	0	0	0	0
1317	SSL2.50CH03_59449944	SL2.50CH03	59449944	0.156	0.91457	0.08543	0	0	0	0
1318	SSL2.50CH03_59481207	SL2.50CH03	59481207	0.21	0.88065	0.11935	0	0	0	0
1319	SSL2.50CH03_59519353	SL2.50CH03	59519353	0.182	0.89899	0.10101	0	0	0	0
1320	SSL2.50CH03_59544066	SL2.50CH03	59544066	0.083	0.95685	0.04315	0	0	0	0
1321	SSL2.50CH03_59560344	SL2.50CH03	59560344	0.017	0.99123	0.00877	0	0	0	0
1322	SSL2.50CH03_59587787	SL2.50CH03	59587787	0.265	0.84296	0.15704	0	0	0	0
1323	SSL2.50CH03_59763731	SL2.50CH03	59763731	0.121	0.93544	0.06456	0	0	0	0
1324	SSL2.50CH03_59778926	SL2.50CH03	59778926	0.056	0.97118	0.02757	0.00125	0	0	0
1325	SSL2.50CH03_59826731	SL2.50CH03	59826731	0.095	0.94975	0.05025	0	0	0	0
1326	SSL2.50CH03_59870670	SL2.50CH03	59870670	0.11	0.94148	0.05852	0	0	0	0
1327	SSL2.50CH03_59894726	SL2.50CH03	59894726	0.16	0.91206	0.08794	0	0	0	0
1328	SSL2.50CH03_59925858	SL2.50CH03	59925858	0.125	0.93325	0.06675	0	0	0	0
1329	SSL2.50CH03_59946002	SL2.50CH03	59946002	0.138	0.92532	0.07468	0	0	0	0
1330	SSL2.50CH03_60012033	SL2.50CH03	60012033	0.032	0.98371	0.01629	0	0	0	0
1331	SSL2.50CH03_60161024	SL2.50CH03	60161024	0.144	0.92191	0.07809	0	0	0	0
1332	SSL2.50CH03_60427735	SL2.50CH03	60427735	0.466	0.62972	0.37028	0	0	0	0
1333	SSL2.50CH03_60482253	SL2.50CH03	60482253	0.066	0.96582	0.03418	0	0	0	0
1334	SSL2.50CH03_60560999	SL2.50CH03	60560999	0.144	0.92211	0.07789	0	0	0	0
1335	SSL2.50CH03_60729275	SL2.50CH03	60729275	0.063	0.96742	0.03258	0	0	0	0
1336	SSL2.50CH03_60759713	SL2.50CH03	60759713	0.498	0.52792	0.47208	0	0	0	0
1337	SSL2.50CH03_60819162	SL2.50CH03	60819162	0.219	0.875	0.125	0	0	0	0
1338	SSL2.50CH03_60900147	SL2.50CH03	60900147	0.106	0.94361	0.05639	0	0	0	0
1339	SSL2.50CH03_60989480	SL2.50CH03	60989480	0.152	0.91688	0.08312	0	0	0	0
1340	SSL2.50CH03_61069384	SL2.50CH03	61069384	0.152	0.91709	0.08291	0	0	0	0
1341	SSL2.50CH03_61205693	SL2.50CH03	61205693	0.137	0.92588	0.07412	0	0	0	0
1342	SSL2.50CH03_61287685	SL2.50CH03	61287685	0.202	0.88596	0.11404	0	0	0	0
1343	SSL2.50CH03_61351507	SL2.50CH03	61351507	0.075	0.96086	0.03914	0	0	0	0
1344	SSL2.50CH03_61401750	SL2.50CH03	61401750	0.142	0.92462	0.04899	0.02638	0	0	0
1345	SSL2.50CH03_61473035	SL2.50CH03	61473035	0.1	0.9471	0.0529	0	0	0	0
1346	SSL2.50CH03_61491754	SL2.50CH03	61491754	0.231	0.8665	0.1335	0	0	0	0
1347	SSL2.50CH03_61701945	SL2.50CH03	61701945	0.125	0.93308	0.06692	0	0	0	0
1348	SSL2.50CH03_61717158	SL2.50CH03	61717158	0.161	0.91184	0.08816	0	0	0	0
1349	SSL2.50CH03_61732217	SL2.50CH03	61732217	0.164	0.91013	0.08987	0	0	0	0
1350	SSL2.50CH03_61749374	SL2.50CH03	61749374	0.051	0.97362	0.02638	0	0	0	0
1351	SSL2.50CH03_61767250	SL2.50CH03	61767250	0.042	0.9787	0.0213	0	0	0	0
1352	SSL2.50CH03_61803343	SL2.50CH03	61803343	0.154	0.91583	0.08417	0	0	0	0
1353	SSL2.50CH03_61833564	SL2.50CH03	61833564	0.119	0.93671	0.06329	0	0	0	0
1354	SSL2.50CH03_61906782	SL2.50CH03	61906782	0.092	0.95202	0.0303	0.01768	0	0	0
1355	SSL2.50CH03_61941545	SL2.50CH03	61941545	0.017	0.99121	0.00879	0	0	0	0
1356	SSL2.50CH03_61976745	SL2.50CH03	61976745	0.125	0.93274	0.06726	0	0	0	0
1357	SSL2.50CH03_61997930	SL2.50CH03	61997930	0.143	0.92231	0.07769	0	0	0	0
1358	SSL2.50CH03_62022799	SL2.50CH03	62022799	0.071	0.96338	0.03662	0	0	0	0
1359	SSL2.50CH03_62107996	SL2.50CH03	62107996	0.144	0.92211	0.07789	0	0	0	0
1360	SSL2.50CH03_62160439	SL2.50CH03	62160439	0.073	0.96231	0.03769	0	0	0	0
1361	SSL2.50CH03_62175449	SL2.50CH03	62175449	0.077	0.9599	0.0401	0	0	0	0
1362	SSL2.50CH03_62256015	SL2.50CH03	62256015	0.155	0.91709	0.05653	0.02638	0	0	0
1363	SSL2.50CH03_62312254	SL2.50CH03	62312254	0.171	0.90578	0.09422	0	0	0	0
1364	SSL2.50CH03_62438370	SL2.50CH03	62438370	0.131	0.92947	0.07053	0	0	0	0
1365	SSL2.50CH03_62458388	SL2.50CH03	62458388	0.07	0.96348	0.03652	0	0	0	0
1366	SSL2.50CH03_62511405	SL2.50CH03	62511405	0.095	0.94975	0.05025	0	0	0	0
1367	SSL2.50CH03_62598061	SL2.50CH03	62598061	0.152	0.91688	0.08312	0	0	0	0
1368	SSL2.50CH03_62630172	SL2.50CH03	62630172	0.12	0.93577	0.06423	0	0	0	0
1369	SSL2.50CH03_62646622	SL2.50CH03	62646622	0.4	0.72375	0.27625	0	0	0	0
1370	SSL2.50CH03_62753809	SL2.50CH03	62753809	0.088	0.95363	0.04637	0	0	0	0
1371	SSL2.50CH03_62815749	SL2.50CH03	62815749	0.171	0.90578	0.09422	0	0	0	0
1372	SSL2.50CH03_62853067	SL2.50CH03	62853067	0.169	0.90932	0.0466	0.04408	0	0	0
1373	SSL2.50CH03_62967412	SL2.50CH03	62967412	0.133	0.92821	0.07179	0	0	0	0
1374	SSL2.50CH03_62982564	SL2.50CH03	62982564	0.213	0.87909	0.12091	0	0	0	0
1375	SSL2.50CH03_63061336	SL2.50CH03	63061336	0.142	0.92337	0.07663	0	0	0	0
1376	SSL2.50CH03_63121335	SL2.50CH03	63121335	0.195	0.89043	0.10957	0	0	0	0
1377	SSL2.50CH03_63136704	SL2.50CH03	63136704	0.144	0.92191	0.07809	0	0	0	0
1378	SSL2.50CH03_63222090	SL2.50CH03	63222090	0.135	0.92692	0.07308	0	0	0	0
1379	SSL2.50CH03_63238654	SL2.50CH03	63238654	0.499	0.5229	0.4771	0	0	0	0
1380	SSL2.50CH03_63255714	SL2.50CH03	63255714	0.191	0.89322	0.10678	0	0	0	0
1381	SSL2.50CH03_63303303	SL2.50CH03	63303303	0.105	0.94444	0.05556	0	0	0	0
1382	SSL2.50CH03_63405128	SL2.50CH03	63405128	0.058	0.96985	0.03015	0	0	0	0
1383	SSL2.50CH03_63473108	SL2.50CH03	63473108	0.186	0.89599	0.10401	0	0	0	0
1384	SSL2.50CH03_63519077	SL2.50CH03	63519077	0.027	0.98618	0.01382	0	0	0	0
1385	SSL2.50CH03_63602406	SL2.50CH03	63602406	0.209	0.88191	0.11683	0.00126	0	0	0
1386	SSL2.50CH03_63617628	SL2.50CH03	63617628	0.144	0.92191	0.07809	0	0	0	0
1387	SSL2.50CH03_63633662	SL2.50CH03	63633662	0.212	0.8794	0.1206	0	0	0	0
1388	SSL2.50CH03_63651440	SL2.50CH03	63651440	0.214	0.87845	0.12155	0	0	0	0
1389	SSL2.50CH03_63666662	SL2.50CH03	63666662	0.173	0.90704	0.05528	0.03769	0	0	0
1390	SSL2.50CH03_63706852	SL2.50CH03	63706852	0.137	0.92588	0.07412	0	0	0	0
1391	SSL2.50CH03_63777879	SL2.50CH03	63777879	0.187	0.89573	0.10427	0	0	0	0
1392	SSL2.50CH03_63881217	SL2.50CH03	63881217	0.096	0.94937	0.05063	0	0	0	0
1393	SSL2.50CH03_63948920	SL2.50CH03	63948920	0.095	0.94975	0.05025	0	0	0	0
1394	SSL2.50CH03_64146594	SL2.50CH03	64146594	0.122	0.93467	0.06533	0	0	0	0
1395	SSL2.50CH03_64169810	SL2.50CH03	64169810	0.187	0.89573	0.10427	0	0	0	0
1396	SSL2.50CH03_64186099	SL2.50CH03	64186099	0.091	0.95214	0.04786	0	0	0	0
1397	SSL2.50CH03_64203288	SL2.50CH03	64203288	0.082	0.95718	0.04282	0	0	0	0
1398	SSL2.50CH03_64306836	SL2.50CH03	64306836	0.194	0.89196	0.10176	0.00628	0	0	0
1399	SSL2.50CH03_64339389	SL2.50CH03	64339389	0.187	0.89573	0.10427	0	0	0	0
1400	SSL2.50CH03_64355639	SL2.50CH03	64355639	0.185	0.89673	0.10327	0	0	0	0
1401	SSL2.50CH03_64386292	SL2.50CH03	64386292	0.08	0.95844	0.04156	0	0	0	0
1402	SSL2.50CH03_64407146	SL2.50CH03	64407146	0.181	0.8995	0.1005	0	0	0	0
1403	SSL2.50CH03_64444708	SL2.50CH03	64444708	0.096	0.94962	0.05038	0	0	0	0
1404	SSL2.50CH03_64576723	SL2.50CH03	64576723	0.08	0.95865	0.02506	0.01629	0	0	0
1405	SSL2.50CH03_64649283	SL2.50CH03	64649283	0.183	0.89824	0.10176	0	0	0	0
1406	SSL2.50CH03_64743803	SL2.50CH03	64743803	0.193	0.89196	0.10804	0	0	0	0
1407	SSL2.50CH03_64775254	SL2.50CH03	64775254	0.175	0.90302	0.09698	0	0	0	0
1408	SSL2.50CH03_64796589	SL2.50CH03	64796589	0.227	0.86935	0.13065	0	0	0	0
1409	SSL2.50CH03_64833458	SL2.50CH03	64833458	0.141	0.92356	0.07644	0	0	0	0
1410	SSL2.50CH03_64897714	SL2.50CH03	64897714	0.091	0.95214	0.04786	0	0	0	0
1411	SSL2.50CH03_64945783	SL2.50CH03	64945783	0.01	0.99499	0.00501	0	0	0	0
1412	SSL2.50CH03_65091144	SL2.50CH03	65091144	0.013	0.99357	0.00643	0	0	0	0
1413	SSL2.50CH03_65106832	SL2.50CH03	65106832	0.178	0.901	0.099	0	0	0	0
1414	SSL2.50CH03_65231101	SL2.50CH03	65231101	0.1	0.94724	0.05276	0	0	0	0
1415	SSL2.50CH03_65272612	SL2.50CH03	65272612	0.138	0.92569	0.07431	0	0	0	0
1416	SSL2.50CH03_65287707	SL2.50CH03	65287707	0.061	0.96827	0.03173	0	0	0	0
1417	SSL2.50CH03_65302904	SL2.50CH03	65302904	0.215	0.87719	0.12281	0	0	0	0
1418	SSL2.50CH03_65341072	SL2.50CH03	65341072	0.088	0.95363	0.04637	0	0	0	0
1419	SSL2.50CH03_65356468	SL2.50CH03	65356468	0.079	0.95865	0.04135	0	0	0	0
1420	SSL2.50CH03_65373033	SL2.50CH03	65373033	0.08	0.95833	0.04167	0	0	0	0
1421	SSL2.50CH03_65421438	SL2.50CH03	65421438	0.465	0.63191	0.36809	0	0	0	0
1422	SSL2.50CH03_65513900	SL2.50CH03	65513900	0.162	0.91117	0.08883	0	0	0	0
1423	SSL2.50CH03_65623411	SL2.50CH03	65623411	0.063	0.9675	0.0225	0.01	0	0	0
1424	SSL2.50CH03_65832969	SL2.50CH03	65832969	0.157	0.91436	0.08564	0	0	0	0
1425	SSL2.50CH03_65850021	SL2.50CH03	65850021	0.156	0.91454	0.08546	0	0	0	0
1426	SSL2.50CH03_65901469	SL2.50CH03	65901469	0.02	0.98985	0.01015	0	0	0	0
1427	SSL2.50CH03_65918462	SL2.50CH03	65918462	0.07	0.96366	0.03634	0	0	0	0
1428	SSL2.50CH03_65933829	SL2.50CH03	65933829	0.075	0.96096	0.03904	0	0	0	0
1429	SSL2.50CH03_65969691	SL2.50CH03	65969691	0.025	0.98741	0.01259	0	0	0	0
1430	SSL2.50CH03_66017854	SL2.50CH03	66017854	0.091	0.95238	0.04762	0	0	0	0
1431	SSL2.50CH03_66035004	SL2.50CH03	66035004	0.16	0.91206	0.08794	0	0	0	0
1432	SSL2.50CH03_66080866	SL2.50CH03	66080866	0.128	0.93147	0.06853	0	0	0	0
1433	SSL2.50CH03_66098565	SL2.50CH03	66098565	0.173	0.90452	0.09548	0	0	0	0
1434	SSL2.50CH03_66113977	SL2.50CH03	66113977	0.027	0.98622	0.01378	0	0	0	0
1435	SSL2.50CH03_66318984	SL2.50CH03	66318984	0.044	0.97739	0.02261	0	0	0	0
1436	SSL2.50CH03_66340440	SL2.50CH03	66340440	0.02	0.99	0.01	0	0	0	0
1437	SSL2.50CH03_66359305	SL2.50CH03	66359305	0.39	0.73485	0.26515	0	0	0	0
1438	SSL2.50CH03_66392853	SL2.50CH03	66392853	0.307	0.81091	0.18909	0	0	0	0
1439	SSL2.50CH03_66408861	SL2.50CH03	66408861	0.371	0.75379	0.24621	0	0	0	0
1440	SSL2.50CH03_66443276	SL2.50CH03	66443276	0.358	0.76759	0.2299	0.00251	0	0	0
1441	SSL2.50CH03_66520760	SL2.50CH03	66520760	0.386	0.73869	0.26131	0	0	0	0
1442	SSL2.50CH03_66536643	SL2.50CH03	66536643	0.39	0.73492	0.26508	0	0	0	0
1443	SSL2.50CH03_66568177	SL2.50CH03	66568177	0.303	0.81407	0.18593	0	0	0	0
1444	SSL2.50CH03_66599928	SL2.50CH03	66599928	0.385	0.73995	0.26005	0	0	0	0
1445	SSL2.50CH03_66615460	SL2.50CH03	66615460	0.387	0.73744	0.26256	0	0	0	0
1446	SSL2.50CH03_66764638	SL2.50CH03	66764638	0.32	0.79975	0.20025	0	0	0	0
1447	SSL2.50CH03_66779975	SL2.50CH03	66779975	0.475	0.61125	0.38875	0	0	0	0
1448	SSL2.50CH03_66846579	SL2.50CH03	66846579	0.415	0.70603	0.29397	0	0	0	0
1449	SSL2.50CH03_66868938	SL2.50CH03	66868938	0.418	0.70253	0.29747	0	0	0	0
1450	SSL2.50CH03_66899524	SL2.50CH03	66899524	0.446	0.66373	0.33627	0	0	0	0
1451	SSL2.50CH03_66929908	SL2.50CH03	66929908	0.443	0.66834	0.33166	0	0	0	0
1452	SSL2.50CH03_66991644	SL2.50CH03	66991644	0.295	0.82035	0.17965	0	0	0	0
1453	SSL2.50CH03_67022140	SL2.50CH03	67022140	0.396	0.72796	0.27204	0	0	0	0
1454	SSL2.50CH03_67061511	SL2.50CH03	67061511	0.39	0.73491	0.26509	0	0	0	0
1455	SSL2.50CH03_67124743	SL2.50CH03	67124743	0.391	0.733	0.267	0	0	0	0
1456	SSL2.50CH03_67159959	SL2.50CH03	67159959	0.383	0.74181	0.25819	0	0	0	0
1457	SSL2.50CH03_67175770	SL2.50CH03	67175770	0.252	0.85242	0.14758	0	0	0	0
1458	SSL2.50CH03_67191060	SL2.50CH03	67191060	0.42	0.70025	0.29975	0	0	0	0
1459	SSL2.50CH03_67236086	SL2.50CH03	67236086	0.171	0.90578	0.09422	0	0	0	0
1460	SSL2.50CH03_67299375	SL2.50CH03	67299375	0.122	0.93484	0.06266	0.00251	0	0	0
1461	SSL2.50CH03_67330933	SL2.50CH03	67330933	0.032	0.98367	0.01633	0	0	0	0
1462	SSL2.50CH03_67346128	SL2.50CH03	67346128	0.163	0.91058	0.08942	0	0	0	0
1463	SSL2.50CH03_67416808	SL2.50CH03	67416808	0.2	0.88722	0.11278	0	0	0	0
1464	SSL2.50CH03_67432232	SL2.50CH03	67432232	0.28	0.83165	0.16835	0	0	0	0
1465	SSL2.50CH03_67517578	SL2.50CH03	67517578	0.159	0.9131	0.0869	0	0	0	0
1466	SSL2.50CH03_67569223	SL2.50CH03	67569223	0.152	0.91729	0.08271	0	0	0	0
1467	SSL2.50CH03_67641552	SL2.50CH03	67641552	0.165	0.90955	0.09045	0	0	0	0
1468	SSL2.50CH03_67673718	SL2.50CH03	67673718	0.138	0.92569	0.07431	0	0	0	0
1469	SSL2.50CH03_67720603	SL2.50CH03	67720603	0.051	0.97362	0.02638	0	0	0	0
1470	SSL2.50CH03_67767722	SL2.50CH03	67767722	0.039	0.97985	0.02015	0	0	0	0
1471	SSL2.50CH03_67799204	SL2.50CH03	67799204	0.201	0.88665	0.11335	0	0	0	0
1472	SSL2.50CH03_67852257	SL2.50CH03	67852257	0.096	0.94962	0.05038	0	0	0	0
1473	SSL2.50CH03_67867650	SL2.50CH03	67867650	0.33	0.79146	0.20854	0	0	0	0
1474	SSL2.50CH03_67917629	SL2.50CH03	67917629	0.133	0.92839	0.07161	0	0	0	0
1475	SSL2.50CH03_68029957	SL2.50CH03	68029957	0.39	0.73426	0.26574	0	0	0	0
1476	SSL2.50CH03_68045036	SL2.50CH03	68045036	0.113	0.9411	0.03509	0.02381	0	0	0
1477	SSL2.50CH03_68061742	SL2.50CH03	68061742	0.189	0.89447	0.10553	0	0	0	0
1478	SSL2.50CH03_68205393	SL2.50CH03	68205393	0.17	0.90602	0.09398	0	0	0	0
1479	SSL2.50CH03_68221825	SL2.50CH03	68221825	0.127	0.9317	0.0683	0	0	0	0
1480	SSL2.50CH03_68240473	SL2.50CH03	68240473	0.15	0.91855	0.08145	0	0	0	0
1481	SSL2.50CH03_68283895	SL2.50CH03	68283895	0.11	0.94148	0.05852	0	0	0	0
1482	SSL2.50CH03_68299149	SL2.50CH03	68299149	0.156	0.91479	0.08521	0	0	0	0
1483	SSL2.50CH03_68344938	SL2.50CH03	68344938	0.12	0.93577	0.06423	0	0	0	0
1484	SSL2.50CH03_68403904	SL2.50CH03	68403904	0.015	0.99244	0.00756	0	0	0	0
1485	SSL2.50CH03_68458705	SL2.50CH03	68458705	0.03	0.98492	0.01508	0	0	0	0
1486	SSL2.50CH03_68474070	SL2.50CH03	68474070	0.046	0.97619	0.02381	0	0	0	0
1487	SSL2.50CH03_68507102	SL2.50CH03	68507102	0.08	0.95844	0.04156	0	0	0	0
1488	SSL2.50CH03_68549545	SL2.50CH03	68549545	0.03	0.98496	0.01504	0	0	0	0
1489	SSL2.50CH03_68626898	SL2.50CH03	68626898	0.131	0.92929	0.07071	0	0	0	0
1490	SSL2.50CH03_68644101	SL2.50CH03	68644101	0.015	0.99244	0.00756	0	0	0	0
1491	SSL2.50CH03_68728009	SL2.50CH03	68728009	0.138	0.92551	0.07449	0	0	0	0
1492	SSL2.50CH03_68745160	SL2.50CH03	68745160	0.077	0.9597	0.0403	0	0	0	0
1493	SSL2.50CH03_68760374	SL2.50CH03	68760374	0.092	0.95178	0.04822	0	0	0	0
1494	SSL2.50CH03_68825783	SL2.50CH03	68825783	0.17	0.90602	0.09398	0	0	0	0
1495	SSL2.50CH03_68845741	SL2.50CH03	68845741	0.072	0.96241	0.03759	0	0	0	0
1496	SSL2.50CH03_68879374	SL2.50CH03	68879374	0.187	0.89573	0.10427	0	0	0	0
1497	SSL2.50CH03_68910478	SL2.50CH03	68910478	0.075	0.96086	0.03914	0	0	0	0
1498	SSL2.50CH03_68967765	SL2.50CH03	68967765	0.155	0.91562	0.08438	0	0	0	0
1499	SSL2.50CH03_69013978	SL2.50CH03	69013978	0.12	0.93577	0.06423	0	0	0	0
1500	SSL2.50CH03_69029257	SL2.50CH03	69029257	0.13	0.92985	0.07015	0	0	0	0
1501	SSL2.50CH03_69048951	SL2.50CH03	69048951	0.078	0.9596	0.0404	0	0	0	0
1502	SSL2.50CH03_69065084	SL2.50CH03	69065084	0.042	0.97864	0.02136	0	0	0	0
1503	SSL2.50CH03_69128521	SL2.50CH03	69128521	0.1	0.94737	0.05263	0	0	0	0
1504	SSL2.50CH03_69179569	SL2.50CH03	69179569	0.17	0.90602	0.09398	0	0	0	0
1505	SSL2.50CH03_69249014	SL2.50CH03	69249014	0.171	0.90578	0.09422	0	0	0	0
1506	SSL2.50CH03_69329386	SL2.50CH03	69329386	0.148	0.9198	0.0802	0	0	0	0
1507	SSL2.50CH03_69405675	SL2.50CH03	69405675	0.168	0.90727	0.09273	0	0	0	0
1508	SSL2.50CH03_69441985	SL2.50CH03	69441985	0.124	0.93342	0.06658	0	0	0	0
1509	SSL2.50CH03_69456990	SL2.50CH03	69456990	0.169	0.90704	0.09296	0	0	0	0
1510	SSL2.50CH03_69489683	SL2.50CH03	69489683	0.028	0.98604	0.01396	0	0	0	0
1511	SSL2.50CH03_69554090	SL2.50CH03	69554090	0.01	0.99497	0.00503	0	0	0	0
1512	SSL2.50CH03_69569105	SL2.50CH03	69569105	0.037	0.98116	0.01884	0	0	0	0
1513	SSL2.50CH03_69584417	SL2.50CH03	69584417	0.032	0.98363	0.01637	0	0	0	0
1514	SSL2.50CH03_69650099	SL2.50CH03	69650099	0.139	0.92462	0.07538	0	0	0	0
1515	SSL2.50CH03_69713841	SL2.50CH03	69713841	0.16	0.91206	0.08794	0	0	0	0
1516	SSL2.50CH03_69745293	SL2.50CH03	69745293	0.136	0.92658	0.07342	0	0	0	0
1517	SSL2.50CH03_69760597	SL2.50CH03	69760597	0.214	0.87814	0.12186	0	0	0	0
1518	SSL2.50CH03_69792418	SL2.50CH03	69792418	0.082	0.95718	0.04282	0	0	0	0
1519	SSL2.50CH03_69808260	SL2.50CH03	69808260	0.096	0.94949	0.05051	0	0	0	0
1520	SSL2.50CH03_69907664	SL2.50CH03	69907664	0.158	0.91332	0.08668	0	0	0	0
1521	SSL2.50CH03_70024868	SL2.50CH03	70024868	0.126	0.93216	0.06784	0	0	0	0
1522	SSL2.50CH03_70055438	SL2.50CH03	70055438	0.049	0.97487	0.02513	0	0	0	0
1523	SSL2.50CH03_70139463	SL2.50CH03	70139463	0.161	0.91184	0.08816	0	0	0	0
1524	SSL2.50CH03_70219356	SL2.50CH03	70219356	0.168	0.90727	0.09273	0	0	0	0
1525	SSL2.50CH03_70255979	SL2.50CH03	70255979	0.157	0.91436	0.08564	0	0	0	0
1526	SSL2.50CH03_70283086	SL2.50CH03	70283086	0.135	0.92714	0.07286	0	0	0	0
1527	SSL2.50CH03_70298168	SL2.50CH03	70298168	0.126	0.93223	0.06777	0	0	0	0
1528	SSL2.50CH03_70375169	SL2.50CH03	70375169	0.105	0.94472	0.05402	0.00126	0	0	0
1529	SSL2.50CH03_70440115	SL2.50CH03	70440115	0.02	0.98969	0.01031	0	0	0	0
1530	SSL2.50CH03_70497256	SL2.50CH03	70497256	0.044	0.97739	0.02261	0	0	0	0
1531	SSL2.50CH03_70562826	SL2.50CH03	70562826	0.119	0.93669	0.06331	0	0	0	0
1532	SSL2.50CH03_70675456	SL2.50CH03	70675456	0.044	0.9775	0.0225	0	0	0	0
1533	SSL2.50CH04_45258	SL2.50CH04	45258	0.21	0.88095	0.11905	0	0	0	0
1534	SSL2.50CH04_60835	SL2.50CH04	60835	0.189	0.89421	0.10579	0	0	0	0
1535	SSL2.50CH04_196834	SL2.50CH04	196834	0.092	0.95165	0.04835	0	0	0	0
1536	SSL2.50CH04_243473	SL2.50CH04	243473	0.127	0.93199	0.06801	0	0	0	0
1537	SSL2.50CH04_328647	SL2.50CH04	328647	0.07	0.96357	0.03643	0	0	0	0
1538	SSL2.50CH04_344632	SL2.50CH04	344632	0.08	0.95823	0.04177	0	0	0	0
1539	SSL2.50CH04_411906	SL2.50CH04	411906	0.127	0.93205	0.06795	0	0	0	0
1540	SSL2.50CH04_478163	SL2.50CH04	478163	0.114	0.93959	0.06041	0	0	0	0
1541	SSL2.50CH04_493606	SL2.50CH04	493606	0.187	0.89573	0.10427	0	0	0	0
1542	SSL2.50CH04_567392	SL2.50CH04	567392	0.084	0.95592	0.04408	0	0	0	0
1543	SSL2.50CH04_585336	SL2.50CH04	585336	0.147	0.91985	0.08015	0	0	0	0
1544	SSL2.50CH04_665106	SL2.50CH04	665106	0.164	0.91013	0.08987	0	0	0	0
1545	SSL2.50CH04_687334	SL2.50CH04	687334	0.069	0.96419	0.03581	0	0	0	0
1546	SSL2.50CH04_706178	SL2.50CH04	706178	0.118	0.93703	0.06297	0	0	0	0
1547	SSL2.50CH04_744120	SL2.50CH04	744120	0.447	0.66329	0.33671	0	0	0	0
1548	SSL2.50CH04_860874	SL2.50CH04	860874	0.385	0.73985	0.26015	0	0	0	0
1549	SSL2.50CH04_942761	SL2.50CH04	942761	0.349	0.77456	0.22544	0	0	0	0
1550	SSL2.50CH04_995935	SL2.50CH04	995935	0.403	0.7204	0.2796	0	0	0	0
1551	SSL2.50CH04_1041213	SL2.50CH04	1041213	0.458	0.64447	0.35553	0	0	0	0
1552	SSL2.50CH04_1056269	SL2.50CH04	1056269	0.122	0.93467	0.06533	0	0	0	0
1553	SSL2.50CH04_1239792	SL2.50CH04	1239792	0.202	0.88596	0.11404	0	0	0	0
1554	SSL2.50CH04_1255406	SL2.50CH04	1255406	0.183	0.89824	0.10176	0	0	0	0
1555	SSL2.50CH04_1458549	SL2.50CH04	1458549	0.491	0.56675	0.43325	0	0	0	0
1556	SSL2.50CH04_1493585	SL2.50CH04	1493585	0.405	0.71809	0.28191	0	0	0	0
1557	SSL2.50CH04_1535392	SL2.50CH04	1535392	0.201	0.88693	0.11307	0	0	0	0
1558	SSL2.50CH04_1575918	SL2.50CH04	1575918	0.193	0.89196	0.10804	0	0	0	0
1559	SSL2.50CH04_1637361	SL2.50CH04	1637361	0.139	0.92474	0.07526	0	0	0	0
1560	SSL2.50CH04_1656536	SL2.50CH04	1656536	0.174	0.90374	0.09626	0	0	0	0
1561	SSL2.50CH04_1704140	SL2.50CH04	1704140	0.025	0.98747	0.01253	0	0	0	0
1562	SSL2.50CH04_1762370	SL2.50CH04	1762370	0.063	0.96734	0.03266	0	0	0	0
1563	SSL2.50CH04_1918056	SL2.50CH04	1918056	0.111	0.94081	0.05919	0	0	0	0
1564	SSL2.50CH04_1975077	SL2.50CH04	1975077	0.16	0.91206	0.08794	0	0	0	0
1565	SSL2.50CH04_2025434	SL2.50CH04	2025434	0.212	0.8798	0.1202	0	0	0	0
1566	SSL2.50CH04_2049818	SL2.50CH04	2049818	0.093	0.95101	0.04899	0	0	0	0
1567	SSL2.50CH04_2187125	SL2.50CH04	2187125	0.204	0.88442	0.11558	0	0	0	0
1568	SSL2.50CH04_2217949	SL2.50CH04	2217949	0.492	0.56266	0.43734	0	0	0	0
1569	SSL2.50CH04_2253672	SL2.50CH04	2253672	0.435	0.6809	0.3191	0	0	0	0
1570	SSL2.50CH04_2284007	SL2.50CH04	2284007	0.46	0.64196	0.35804	0	0	0	0
1571	SSL2.50CH04_2315158	SL2.50CH04	2315158	0.206	0.88317	0.11683	0	0	0	0
1572	SSL2.50CH04_2330794	SL2.50CH04	2330794	0.427	0.69095	0.30905	0	0	0	0
1573	SSL2.50CH04_2475991	SL2.50CH04	2475991	0.056	0.97111	0.02889	0	0	0	0
1574	SSL2.50CH04_2579900	SL2.50CH04	2579900	0.131	0.92965	0.07035	0	0	0	0
1575	SSL2.50CH04_2660695	SL2.50CH04	2660695	0.141	0.92366	0.07634	0	0	0	0
1576	SSL2.50CH04_2688071	SL2.50CH04	2688071	0.02	0.98997	0.01003	0	0	0	0
1577	SSL2.50CH04_2823215	SL2.50CH04	2823215	0.167	0.90829	0.09171	0	0	0	0
1578	SSL2.50CH04_2838280	SL2.50CH04	2838280	0.14	0.92443	0.07557	0	0	0	0
1579	SSL2.50CH04_2875534	SL2.50CH04	2875534	0.142	0.92337	0.07663	0	0	0	0
1580	SSL2.50CH04_2924951	SL2.50CH04	2924951	0.5	0.51131	0.48869	0	0	0	0
1581	SSL2.50CH04_2991428	SL2.50CH04	2991428	0.02	0.98995	0.01005	0	0	0	0
1582	SSL2.50CH04_3009326	SL2.50CH04	3009326	0.027	0.98622	0.01378	0	0	0	0
1583	SSL2.50CH04_3062149	SL2.50CH04	3062149	0.32	0.79975	0.20025	0	0	0	0
1584	SSL2.50CH04_3097164	SL2.50CH04	3097164	0.134	0.92803	0.07197	0	0	0	0
1585	SSL2.50CH04_3170146	SL2.50CH04	3170146	0.173	0.90452	0.09548	0	0	0	0
1586	SSL2.50CH04_3214834	SL2.50CH04	3214834	0.051	0.97362	0.02638	0	0	0	0
1587	SSL2.50CH04_3261403	SL2.50CH04	3261403	0.177	0.90176	0.09824	0	0	0	0
1588	SSL2.50CH04_3396793	SL2.50CH04	3396793	0.158	0.91332	0.08668	0	0	0	0
1589	SSL2.50CH04_3430126	SL2.50CH04	3430126	0.061	0.96859	0.03141	0	0	0	0
1590	SSL2.50CH04_3502672	SL2.50CH04	3502672	0.027	0.98618	0.01382	0	0	0	0
1591	SSL2.50CH04_3536727	SL2.50CH04	3536727	0.162	0.9108	0.0892	0	0	0	0
1592	SSL2.50CH04_3619162	SL2.50CH04	3619162	0.017	0.99118	0.00882	0	0	0	0
1593	SSL2.50CH04_3833152	SL2.50CH04	3833152	0.025	0.98747	0.01253	0	0	0	0
1594	SSL2.50CH04_3848266	SL2.50CH04	3848266	0.047	0.97601	0.02399	0	0	0	0
1595	SSL2.50CH04_3869078	SL2.50CH04	3869078	0.195	0.8907	0.1093	0	0	0	0
1596	SSL2.50CH04_3919805	SL2.50CH04	3919805	0.147	0.92	0.08	0	0	0	0
1597	SSL2.50CH04_3957090	SL2.50CH04	3957090	0.032	0.98363	0.01637	0	0	0	0
1598	SSL2.50CH04_3987144	SL2.50CH04	3987144	0.17	0.90602	0.09398	0	0	0	0
1599	SSL2.50CH04_4048759	SL2.50CH04	4048759	0.073	0.96222	0.03778	0	0	0	0
1600	SSL2.50CH04_4118686	SL2.50CH04	4118686	0.135	0.92714	0.07286	0	0	0	0
1601	SSL2.50CH04_4167274	SL2.50CH04	4167274	0.496	0.54679	0.45321	0	0	0	0
1602	SSL2.50CH04_4184549	SL2.50CH04	4184549	0.114	0.93909	0.06091	0	0	0	0
1603	SSL2.50CH04_4394411	SL2.50CH04	4394411	0.085	0.95547	0.04453	0	0	0	0
1604	SSL2.50CH04_4429713	SL2.50CH04	4429713	0.494	0.55402	0.44598	0	0	0	0
1605	SSL2.50CH04_4495347	SL2.50CH04	4495347	0.13	0.93003	0.06997	0	0	0	0
1606	SSL2.50CH04_4510923	SL2.50CH04	4510923	0.03	0.98489	0.01511	0	0	0	0
1607	SSL2.50CH04_4546352	SL2.50CH04	4546352	0.168	0.90727	0.09273	0	0	0	0
1608	SSL2.50CH04_4640409	SL2.50CH04	4640409	0.173	0.90452	0.09548	0	0	0	0
1609	SSL2.50CH04_4655433	SL2.50CH04	4655433	0.098	0.94836	0.05164	0	0	0	0
1610	SSL2.50CH04_4780113	SL2.50CH04	4780113	0.055	0.97185	0.02815	0	0	0	0
1611	SSL2.50CH04_4795731	SL2.50CH04	4795731	0.159	0.9131	0.0869	0	0	0	0
1612	SSL2.50CH04_4918392	SL2.50CH04	4918392	0.025	0.98737	0.01263	0	0	0	0
1613	SSL2.50CH04_5065881	SL2.50CH04	5065881	0.017	0.99125	0.00875	0	0	0	0
1614	SSL2.50CH04_5126905	SL2.50CH04	5126905	0.02	0.98995	0.00754	0.00251	0	0	0
1615	SSL2.50CH04_5227109	SL2.50CH04	5227109	0.136	0.9264	0.0736	0	0	0	0
1616	SSL2.50CH04_5258075	SL2.50CH04	5258075	0.135	0.9273	0.0727	0	0	0	0
1617	SSL2.50CH04_5276785	SL2.50CH04	5276785	0.162	0.91117	0.08883	0	0	0	0
1618	SSL2.50CH04_5293020	SL2.50CH04	5293020	0.177	0.90201	0.09799	0	0	0	0
1619	SSL2.50CH04_5340246	SL2.50CH04	5340246	0.141	0.92375	0.07625	0	0	0	0
1620	SSL2.50CH04_5369242	SL2.50CH04	5369242	0.189	0.89447	0.10553	0	0	0	0
1621	SSL2.50CH04_5390910	SL2.50CH04	5390910	0.012	0.99373	0.00627	0	0	0	0
1622	SSL2.50CH04_5407197	SL2.50CH04	5407197	0.124	0.93342	0.06658	0	0	0	0
1623	SSL2.50CH04_5455208	SL2.50CH04	5455208	0.148	0.9194	0.0806	0	0	0	0
1624	SSL2.50CH04_5473649	SL2.50CH04	5473649	0.167	0.90932	0.07683	0.01385	0	0	0
1625	SSL2.50CH04_5549464	SL2.50CH04	5549464	0.111	0.94081	0.05919	0	0	0	0
1626	SSL2.50CH04_5599711	SL2.50CH04	5599711	0.118	0.93719	0.06281	0	0	0	0
1627	SSL2.50CH04_5703281	SL2.50CH04	5703281	0.042	0.9787	0.0213	0	0	0	0
1628	SSL2.50CH04_5718356	SL2.50CH04	5718356	0.268	0.84046	0.15954	0	0	0	0
1629	SSL2.50CH04_5876359	SL2.50CH04	5876359	0.1	0.94737	0.05138	0.00125	0	0	0
1630	SSL2.50CH04_6464253	SL2.50CH04	6464253	0.015	0.99244	0.00756	0	0	0	0
1631	SSL2.50CH04_6514047	SL2.50CH04	6514047	0.039	0.97995	0.02005	0	0	0	0
1632	SSL2.50CH04_6529094	SL2.50CH04	6529094	0.118	0.93703	0.06297	0	0	0	0
1633	SSL2.50CH04_6667321	SL2.50CH04	6667321	0.117	0.93734	0.06266	0	0	0	0
1634	SSL2.50CH04_6783452	SL2.50CH04	6783452	0.175	0.90302	0.09698	0	0	0	0
1635	SSL2.50CH04_6972503	SL2.50CH04	6972503	0.129	0.9309	0.0691	0	0	0	0
1636	SSL2.50CH04_7013548	SL2.50CH04	7013548	0.181	0.89924	0.10076	0	0	0	0
1637	SSL2.50CH04_7065110	SL2.50CH04	7065110	0.017	0.99121	0.00879	0	0	0	0
1638	SSL2.50CH04_7311134	SL2.50CH04	7311134	0.094	0.95076	0.04924	0	0	0	0
1639	SSL2.50CH04_7335902	SL2.50CH04	7335902	0.091	0.95214	0.04786	0	0	0	0
1640	SSL2.50CH04_7356631	SL2.50CH04	7356631	0.489	0.57431	0.42569	0	0	0	0
1641	SSL2.50CH04_7569651	SL2.50CH04	7569651	0.107	0.94347	0.05653	0	0	0	0
1642	SSL2.50CH04_7768562	SL2.50CH04	7768562	0.482	0.59572	0.40428	0	0	0	0
1643	SSL2.50CH04_7897549	SL2.50CH04	7897549	0.415	0.70611	0.29389	0	0	0	0
1644	SSL2.50CH04_8376278	SL2.50CH04	8376278	0.128	0.93108	0.06892	0	0	0	0
1645	SSL2.50CH04_9356896	SL2.50CH04	9356896	0.438	0.67578	0.32422	0	0	0	0
1646	SSL2.50CH04_9603465	SL2.50CH04	9603465	0.177	0.90201	0.09799	0	0	0	0
1647	SSL2.50CH04_11187535	SL2.50CH04	11187535	0.028	0.98575	0.01425	0	0	0	0
1648	SSL2.50CH04_11919136	SL2.50CH04	11919136	0.395	0.72911	0.27089	0	0	0	0
1649	SSL2.50CH04_11956656	SL2.50CH04	11956656	0.08	0.95844	0.04156	0	0	0	0
1650	SSL2.50CH04_12032840	SL2.50CH04	12032840	0.107	0.94347	0.05653	0	0	0	0
1651	SSL2.50CH04_12079229	SL2.50CH04	12079229	0.149	0.91919	0.08081	0	0	0	0
1652	SSL2.50CH04_12346329	SL2.50CH04	12346329	0.177	0.90201	0.09799	0	0	0	0
1653	SSL2.50CH04_12361599	SL2.50CH04	12361599	0.171	0.90554	0.09446	0	0	0	0
1654	SSL2.50CH04_12381643	SL2.50CH04	12381643	0.222	0.87312	0.12688	0	0	0	0
1655	SSL2.50CH04_12450726	SL2.50CH04	12450726	0.175	0.90302	0.09698	0	0	0	0
1656	SSL2.50CH04_12725946	SL2.50CH04	12725946	0.113	0.93985	0.06015	0	0	0	0
1657	SSL2.50CH04_12766544	SL2.50CH04	12766544	0.166	0.90852	0.09148	0	0	0	0
1658	SSL2.50CH04_13363532	SL2.50CH04	13363532	0.179	0.9005	0.0995	0	0	0	0
1659	SSL2.50CH04_14887611	SL2.50CH04	14887611	0.181	0.8995	0.1005	0	0	0	0
1660	SSL2.50CH04_16478309	SL2.50CH04	16478309	0.16	0.91206	0.08794	0	0	0	0
1661	SSL2.50CH04_18282177	SL2.50CH04	18282177	0.172	0.90476	0.09524	0	0	0	0
1662	SSL2.50CH04_18825831	SL2.50CH04	18825831	0.107	0.94347	0.05653	0	0	0	0
1663	SSL2.50CH04_19105524	SL2.50CH04	19105524	0.161	0.91176	0.08824	0	0	0	0
1664	SSL2.50CH04_19663078	SL2.50CH04	19663078	0.208	0.88191	0.11809	0	0	0	0
1665	SSL2.50CH04_19815857	SL2.50CH04	19815857	0.218	0.87531	0.12469	0	0	0	0
1666	SSL2.50CH04_19997671	SL2.50CH04	19997671	0.052	0.97335	0.02665	0	0	0	0
1667	SSL2.50CH04_20518600	SL2.50CH04	20518600	0.093	0.95113	0.04887	0	0	0	0
1668	SSL2.50CH04_20790138	SL2.50CH04	20790138	0.186	0.89651	0.10349	0	0	0	0
1669	SSL2.50CH04_20805368	SL2.50CH04	20805368	0.218	0.87563	0.12437	0	0	0	0
1670	SSL2.50CH04_20957883	SL2.50CH04	20957883	0.095	0.94987	0.05013	0	0	0	0
1671	SSL2.50CH04_21318376	SL2.50CH04	21318376	0.136	0.92655	0.07345	0	0	0	0
1672	SSL2.50CH04_21358760	SL2.50CH04	21358760	0.104	0.94472	0.05528	0	0	0	0
1673	SSL2.50CH04_21781111	SL2.50CH04	21781111	0.093	0.95088	0.04912	0	0	0	0
1674	SSL2.50CH04_22103589	SL2.50CH04	22103589	0.108	0.9426	0.0574	0	0	0	0
1675	SSL2.50CH04_22436884	SL2.50CH04	22436884	0.179	0.90052	0.09948	0	0	0	0
1676	SSL2.50CH04_23031499	SL2.50CH04	23031499	0.091	0.95238	0.04762	0	0	0	0
1677	SSL2.50CH04_25238848	SL2.50CH04	25238848	0.209	0.88131	0.11869	0	0	0	0
1678	SSL2.50CH04_25348569	SL2.50CH04	25348569	0.156	0.91479	0.08521	0	0	0	0
1679	SSL2.50CH04_27099741	SL2.50CH04	27099741	0.176	0.90228	0.09772	0	0	0	0
1680	SSL2.50CH04_27878833	SL2.50CH04	27878833	0.15	0.91837	0.08163	0	0	0	0
1681	SSL2.50CH04_28916520	SL2.50CH04	28916520	0.222	0.87312	0.12688	0	0	0	0
1682	SSL2.50CH04_29409807	SL2.50CH04	29409807	0.051	0.97362	0.02638	0	0	0	0
1683	SSL2.50CH04_29797896	SL2.50CH04	29797896	0.145	0.92159	0.07841	0	0	0	0
1684	SSL2.50CH04_30182843	SL2.50CH04	30182843	0.229	0.86809	0.13191	0	0	0	0
1685	SSL2.50CH04_30529595	SL2.50CH04	30529595	0.154	0.91583	0.08417	0	0	0	0
1686	SSL2.50CH04_31293175	SL2.50CH04	31293175	0.227	0.86967	0.13033	0	0	0	0
1687	SSL2.50CH04_32023554	SL2.50CH04	32023554	0.102	0.94584	0.05416	0	0	0	0
1688	SSL2.50CH04_32328506	SL2.50CH04	32328506	0.125	0.93299	0.06701	0	0	0	0
1689	SSL2.50CH04_32398508	SL2.50CH04	32398508	0.159	0.91332	0.08417	0.00251	0	0	0
1690	SSL2.50CH04_32495294	SL2.50CH04	32495294	0.485	0.5869	0.4131	0	0	0	0
1691	SSL2.50CH04_32695433	SL2.50CH04	32695433	0.155	0.91562	0.08438	0	0	0	0
1692	SSL2.50CH04_33967842	SL2.50CH04	33967842	0.11	0.94177	0.05823	0	0	0	0
1693	SSL2.50CH04_34487505	SL2.50CH04	34487505	0.191	0.89304	0.10696	0	0	0	0
1694	SSL2.50CH04_35298320	SL2.50CH04	35298320	0.487	0.5806	0.4194	0	0	0	0
1695	SSL2.50CH04_35316320	SL2.50CH04	35316320	0.295	0.81984	0.18016	0	0	0	0
1696	SSL2.50CH04_35332182	SL2.50CH04	35332182	0.209	0.88131	0.11869	0	0	0	0
1697	SSL2.50CH04_35596031	SL2.50CH04	35596031	0.223	0.87186	0.12814	0	0	0	0
1698	SSL2.50CH04_35912436	SL2.50CH04	35912436	0.094	0.95051	0.04949	0	0	0	0
1699	SSL2.50CH04_35945533	SL2.50CH04	35945533	0.152	0.91709	0.08291	0	0	0	0
1700	SSL2.50CH04_36992168	SL2.50CH04	36992168	0.126	0.93308	0.05808	0.00884	0	0	0
1701	SSL2.50CH04_37671198	SL2.50CH04	37671198	0.182	0.89899	0.10101	0	0	0	0
1702	SSL2.50CH04_37697522	SL2.50CH04	37697522	0.193	0.89196	0.10804	0	0	0	0
1703	SSL2.50CH04_38689461	SL2.50CH04	38689461	0.095	0.95013	0.04987	0	0	0	0
1704	SSL2.50CH04_38741130	SL2.50CH04	38741130	0.483	0.59171	0.40829	0	0	0	0
1705	SSL2.50CH04_39166560	SL2.50CH04	39166560	0.152	0.91688	0.08312	0	0	0	0
1706	SSL2.50CH04_39553720	SL2.50CH04	39553720	0.214	0.87845	0.12155	0	0	0	0
1707	SSL2.50CH04_39836633	SL2.50CH04	39836633	0.234	0.86683	0.12186	0.01131	0	0	0
1708	SSL2.50CH04_39934413	SL2.50CH04	39934413	0.215	0.87719	0.12281	0	0	0	0
1709	SSL2.50CH04_39977240	SL2.50CH04	39977240	0.196	0.88987	0.11013	0	0	0	0
1710	SSL2.50CH04_40030530	SL2.50CH04	40030530	0.22	0.87406	0.12594	0	0	0	0
1711	SSL2.50CH04_40248072	SL2.50CH04	40248072	0.037	0.98138	0.01862	0	0	0	0
1712	SSL2.50CH04_41393206	SL2.50CH04	41393206	0.216	0.87688	0.12312	0	0	0	0
1713	SSL2.50CH04_41499908	SL2.50CH04	41499908	0.152	0.91729	0.08271	0	0	0	0
1714	SSL2.50CH04_41767889	SL2.50CH04	41767889	0.19	0.8934	0.1066	0	0	0	0
1715	SSL2.50CH04_41823506	SL2.50CH04	41823506	0.152	0.91729	0.08271	0	0	0	0
1716	SSL2.50CH04_41862333	SL2.50CH04	41862333	0.477	0.60668	0.39332	0	0	0	0
1717	SSL2.50CH04_41972132	SL2.50CH04	41972132	0.156	0.91457	0.08543	0	0	0	0
1718	SSL2.50CH04_42526635	SL2.50CH04	42526635	0.476	0.60886	0.39114	0	0	0	0
1719	SSL2.50CH04_42762636	SL2.50CH04	42762636	0.109	0.94236	0.05764	0	0	0	0
1720	SSL2.50CH04_43054239	SL2.50CH04	43054239	0.224	0.87218	0.12281	0.00501	0	0	0
1721	SSL2.50CH04_43240334	SL2.50CH04	43240334	0.106	0.94361	0.05639	0	0	0	0
1722	SSL2.50CH04_43406464	SL2.50CH04	43406464	0.107	0.94332	0.05668	0	0	0	0
1723	SSL2.50CH04_43853459	SL2.50CH04	43853459	0.104	0.94486	0.05514	0	0	0	0
1724	SSL2.50CH04_44934477	SL2.50CH04	44934477	0.214	0.87783	0.12217	0	0	0	0
1725	SSL2.50CH04_44960614	SL2.50CH04	44960614	0.227	0.86927	0.13073	0	0	0	0
1726	SSL2.50CH04_45189135	SL2.50CH04	45189135	0.125	0.93316	0.06684	0	0	0	0
1727	SSL2.50CH04_45242908	SL2.50CH04	45242908	0.094	0.95063	0.04937	0	0	0	0
1728	SSL2.50CH04_45582196	SL2.50CH04	45582196	0.217	0.87594	0.12406	0	0	0	0
1729	SSL2.50CH04_45655282	SL2.50CH04	45655282	0.106	0.94361	0.05639	0	0	0	0
1730	SSL2.50CH04_45686634	SL2.50CH04	45686634	0.21	0.88101	0.11899	0	0	0	0
1731	SSL2.50CH04_45747086	SL2.50CH04	45747086	0.093	0.95101	0.04899	0	0	0	0
1732	SSL2.50CH04_46279815	SL2.50CH04	46279815	0.116	0.93797	0.06203	0	0	0	0
1733	SSL2.50CH04_46307661	SL2.50CH04	46307661	0.166	0.9084	0.0916	0	0	0	0
1734	SSL2.50CH04_46355811	SL2.50CH04	46355811	0.397	0.72739	0.27261	0	0	0	0
1735	SSL2.50CH04_46526243	SL2.50CH04	46526243	0.145	0.92132	0.07868	0	0	0	0
1736	SSL2.50CH04_46556425	SL2.50CH04	46556425	0.137	0.92602	0.07398	0	0	0	0
1737	SSL2.50CH04_47232365	SL2.50CH04	47232365	0.383	0.74194	0.25806	0	0	0	0
1738	SSL2.50CH04_47274908	SL2.50CH04	47274908	0.1	0.94724	0.05276	0	0	0	0
1739	SSL2.50CH04_47439231	SL2.50CH04	47439231	0.107	0.94347	0.05653	0	0	0	0
1740	SSL2.50CH04_48015730	SL2.50CH04	48015730	0.152	0.91729	0.08271	0	0	0	0
1741	SSL2.50CH04_48190175	SL2.50CH04	48190175	0.19	0.89394	0.10606	0	0	0	0
1742	SSL2.50CH04_48262613	SL2.50CH04	48262613	0.227	0.86967	0.13033	0	0	0	0
1743	SSL2.50CH04_49276382	SL2.50CH04	49276382	0.482	0.59591	0.40409	0	0	0	0
1744	SSL2.50CH04_49319287	SL2.50CH04	49319287	0.108	0.9426	0.0574	0	0	0	0
1745	SSL2.50CH04_49703921	SL2.50CH04	49703921	0.109	0.94207	0.05793	0	0	0	0
1746	SSL2.50CH04_50275331	SL2.50CH04	50275331	0.1	0.9471	0.0529	0	0	0	0
1747	SSL2.50CH04_50444656	SL2.50CH04	50444656	0.165	0.91184	0.04912	0.03904	0	0	0
1748	SSL2.50CH04_50482491	SL2.50CH04	50482491	0.127	0.93199	0.06801	0	0	0	0
1749	SSL2.50CH04_50530913	SL2.50CH04	50530913	0.233	0.86524	0.13476	0	0	0	0
1750	SSL2.50CH04_50839618	SL2.50CH04	50839618	0.095	0.94987	0.05013	0	0	0	0
1751	SSL2.50CH04_50860160	SL2.50CH04	50860160	0.096	0.94949	0.05051	0	0	0	0
1752	SSL2.50CH04_50907103	SL2.50CH04	50907103	0.007	0.99624	0.00376	0	0	0	0
1753	SSL2.50CH04_50966559	SL2.50CH04	50966559	0.089	0.95352	0.04648	0	0	0	0
1754	SSL2.50CH04_51033056	SL2.50CH04	51033056	0.12	0.93593	0.06407	0	0	0	0
1755	SSL2.50CH04_51073447	SL2.50CH04	51073447	0.02	0.9899	0.0101	0	0	0	0
1756	SSL2.50CH04_51266131	SL2.50CH04	51266131	0.09	0.95281	0.04719	0	0	0	0
1757	SSL2.50CH04_51754922	SL2.50CH04	51754922	0.015	0.99244	0.00756	0	0	0	0
1758	SSL2.50CH04_51789409	SL2.50CH04	51789409	0.16	0.91206	0.08794	0	0	0	0
1759	SSL2.50CH04_52553383	SL2.50CH04	52553383	0.102	0.94584	0.05416	0	0	0	0
1760	SSL2.50CH04_52610515	SL2.50CH04	52610515	0.096	0.94924	0.05076	0	0	0	0
1761	SSL2.50CH04_53067155	SL2.50CH04	53067155	0.099	0.94784	0.05216	0	0	0	0
1762	SSL2.50CH04_53181854	SL2.50CH04	53181854	0.171	0.90578	0.09422	0	0	0	0
1763	SSL2.50CH04_53203409	SL2.50CH04	53203409	0.177	0.90176	0.09824	0	0	0	0
1764	SSL2.50CH04_53285557	SL2.50CH04	53285557	0.179	0.90075	0.09925	0	0	0	0
1765	SSL2.50CH04_53300843	SL2.50CH04	53300843	0.197	0.88949	0.11051	0	0	0	0
1766	SSL2.50CH04_53351208	SL2.50CH04	53351208	0.157	0.91436	0.08564	0	0	0	0
1767	SSL2.50CH04_53384817	SL2.50CH04	53384817	0.115	0.9386	0.0614	0	0	0	0
1768	SSL2.50CH04_53654320	SL2.50CH04	53654320	0.095	0.94973	0.05027	0	0	0	0
1769	SSL2.50CH04_53838997	SL2.50CH04	53838997	0.034	0.98246	0.01754	0	0	0	0
1770	SSL2.50CH04_54181571	SL2.50CH04	54181571	0.154	0.91583	0.08417	0	0	0	0
1771	SSL2.50CH04_54213400	SL2.50CH04	54213400	0.147	0.92005	0.07995	0	0	0	0
1772	SSL2.50CH04_54392217	SL2.50CH04	54392217	0.113	0.93985	0.06015	0	0	0	0
1773	SSL2.50CH04_54530113	SL2.50CH04	54530113	0.144	0.92191	0.07809	0	0	0	0
1774	SSL2.50CH04_54562201	SL2.50CH04	54562201	0.082	0.95718	0.04282	0	0	0	0
1775	SSL2.50CH04_54582991	SL2.50CH04	54582991	0.1	0.94724	0.05276	0	0	0	0
1776	SSL2.50CH04_54613164	SL2.50CH04	54613164	0.203	0.88539	0.11461	0	0	0	0
1777	SSL2.50CH04_54628409	SL2.50CH04	54628409	0.218	0.87531	0.12469	0	0	0	0
1778	SSL2.50CH04_54912497	SL2.50CH04	54912497	0.19	0.89348	0.10652	0	0	0	0
1779	SSL2.50CH04_54961181	SL2.50CH04	54961181	0.203	0.8851	0.1149	0	0	0	0
1780	SSL2.50CH04_55021358	SL2.50CH04	55021358	0.3	0.81658	0.18342	0	0	0	0
1781	SSL2.50CH04_55079969	SL2.50CH04	55079969	0.242	0.85949	0.14051	0	0	0	0
1782	SSL2.50CH04_55177251	SL2.50CH04	55177251	0.095	0.94987	0.05013	0	0	0	0
1783	SSL2.50CH04_55254149	SL2.50CH04	55254149	0.242	0.8593	0.1407	0	0	0	0
1784	SSL2.50CH04_55281539	SL2.50CH04	55281539	0.369	0.7557	0.2443	0	0	0	0
1785	SSL2.50CH04_55493066	SL2.50CH04	55493066	0.223	0.87247	0.12753	0	0	0	0
1786	SSL2.50CH04_55515518	SL2.50CH04	55515518	0.282	0.82997	0.17003	0	0	0	0
1787	SSL2.50CH04_55632092	SL2.50CH04	55632092	0.189	0.8944	0.1056	0	0	0	0
1788	SSL2.50CH04_55727155	SL2.50CH04	55727155	0.171	0.90578	0.09171	0.00251	0	0	0
1789	SSL2.50CH04_55825297	SL2.50CH04	55825297	0.239	0.86111	0.13889	0	0	0	0
1790	SSL2.50CH04_55841293	SL2.50CH04	55841293	0.231	0.8665	0.1335	0	0	0	0
1791	SSL2.50CH04_55882933	SL2.50CH04	55882933	0.056	0.97111	0.02889	0	0	0	0
1792	SSL2.50CH04_55898611	SL2.50CH04	55898611	0.242	0.85894	0.14106	0	0	0	0
1793	SSL2.50CH04_55976574	SL2.50CH04	55976574	0.257	0.84887	0.15113	0	0	0	0
1794	SSL2.50CH04_57780542	SL2.50CH04	57780542	0.249	0.85427	0.14573	0	0	0	0
1795	SSL2.50CH04_57840273	SL2.50CH04	57840273	0.176	0.90256	0.09744	0	0	0	0
1796	SSL2.50CH04_57863399	SL2.50CH04	57863399	0.259	0.84712	0.15288	0	0	0	0
1797	SSL2.50CH04_57945504	SL2.50CH04	57945504	0.157	0.91417	0.08583	0	0	0	0
1798	SSL2.50CH04_58070436	SL2.50CH04	58070436	0.165	0.90955	0.09045	0	0	0	0
1799	SSL2.50CH04_58176141	SL2.50CH04	58176141	0.113	0.93985	0.06015	0	0	0	0
1800	SSL2.50CH04_58212433	SL2.50CH04	58212433	0.165	0.90932	0.09068	0	0	0	0
1801	SSL2.50CH04_58266305	SL2.50CH04	58266305	0.208	0.88221	0.11779	0	0	0	0
1802	SSL2.50CH04_58282087	SL2.50CH04	58282087	0.491	0.56709	0.43291	0	0	0	0
1803	SSL2.50CH04_58647071	SL2.50CH04	58647071	0.025	0.98747	0.01253	0	0	0	0
1804	SSL2.50CH04_58664456	SL2.50CH04	58664456	0.137	0.92607	0.07393	0	0	0	0
1805	SSL2.50CH04_58746140	SL2.50CH04	58746140	0.118	0.93703	0.06297	0	0	0	0
1806	SSL2.50CH04_58831136	SL2.50CH04	58831136	0.133	0.92821	0.07179	0	0	0	0
1807	SSL2.50CH04_58913605	SL2.50CH04	58913605	0.434	0.68228	0.31772	0	0	0	0
1808	SSL2.50CH04_58949709	SL2.50CH04	58949709	0.131	0.92965	0.07035	0	0	0	0
1809	SSL2.50CH04_58998756	SL2.50CH04	58998756	0.025	0.98741	0.01259	0	0	0	0
1810	SSL2.50CH04_59029724	SL2.50CH04	59029724	0.177	0.90201	0.09799	0	0	0	0
1811	SSL2.50CH04_59066778	SL2.50CH04	59066778	0.098	0.94836	0.05164	0	0	0	0
1812	SSL2.50CH04_59166698	SL2.50CH04	59166698	0.153	0.91624	0.08376	0	0	0	0
1813	SSL2.50CH04_59181974	SL2.50CH04	59181974	0.057	0.97089	0.02911	0	0	0	0
1814	SSL2.50CH04_59199496	SL2.50CH04	59199496	0.13	0.93003	0.06997	0	0	0	0
1815	SSL2.50CH04_59265789	SL2.50CH04	59265789	0.189	0.89421	0.10579	0	0	0	0
1816	SSL2.50CH04_59281027	SL2.50CH04	59281027	0.192	0.89223	0.10777	0	0	0	0
1817	SSL2.50CH04_59297704	SL2.50CH04	59297704	0.177	0.90176	0.09824	0	0	0	0
1818	SSL2.50CH04_59427527	SL2.50CH04	59427527	0.099	0.94784	0.05216	0	0	0	0
1819	SSL2.50CH04_59449353	SL2.50CH04	59449353	0.073	0.96231	0.03769	0	0	0	0
1820	SSL2.50CH04_59483563	SL2.50CH04	59483563	0.022	0.98866	0.01134	0	0	0	0
1821	SSL2.50CH04_59558054	SL2.50CH04	59558054	0.091	0.95226	0.04774	0	0	0	0
1822	SSL2.50CH04_59620205	SL2.50CH04	59620205	0.168	0.90727	0.09273	0	0	0	0
1823	SSL2.50CH04_59740840	SL2.50CH04	59740840	0.044	0.97733	0.02267	0	0	0	0
1824	SSL2.50CH04_59757899	SL2.50CH04	59757899	0.174	0.90351	0.09649	0	0	0	0
1825	SSL2.50CH04_59774870	SL2.50CH04	59774870	0.003	0.99874	0.00126	0	0	0	0
1826	SSL2.50CH04_59808074	SL2.50CH04	59808074	0.052	0.97355	0.02519	0.00126	0	0	0
1827	SSL2.50CH04_59845400	SL2.50CH04	59845400	0.051	0.97368	0.02632	0	0	0	0
1828	SSL2.50CH04_59868486	SL2.50CH04	59868486	0.138	0.92569	0.07431	0	0	0	0
1829	SSL2.50CH04_59933066	SL2.50CH04	59933066	0.022	0.98866	0.01134	0	0	0	0
1830	SSL2.50CH04_60130338	SL2.50CH04	60130338	0.111	0.9411	0.0589	0	0	0	0
1831	SSL2.50CH04_60270048	SL2.50CH04	60270048	0.131	0.92965	0.07035	0	0	0	0
1832	SSL2.50CH04_60334872	SL2.50CH04	60334872	0.037	0.98111	0.01889	0	0	0	0
1833	SSL2.50CH04_60407351	SL2.50CH04	60407351	0.073	0.96222	0.03778	0	0	0	0
1834	SSL2.50CH04_60471851	SL2.50CH04	60471851	0.091	0.95214	0.04786	0	0	0	0
1835	SSL2.50CH04_60554070	SL2.50CH04	60554070	0.177	0.90204	0.09796	0	0	0	0
1836	SSL2.50CH04_60570369	SL2.50CH04	60570369	0.07	0.96348	0.03652	0	0	0	0
1837	SSL2.50CH04_60585377	SL2.50CH04	60585377	0.199	0.88791	0.11209	0	0	0	0
1838	SSL2.50CH04_60631534	SL2.50CH04	60631534	0.098	0.94836	0.05164	0	0	0	0
1839	SSL2.50CH04_60743990	SL2.50CH04	60743990	0.192	0.89258	0.10742	0	0	0	0
1840	SSL2.50CH04_61004395	SL2.50CH04	61004395	0.11	0.94156	0.05844	0	0	0	0
1841	SSL2.50CH04_61041876	SL2.50CH04	61041876	0.169	0.9068	0.09194	0.00126	0	0	0
1842	SSL2.50CH04_61148513	SL2.50CH04	61148513	0.227	0.86935	0.13065	0	0	0	0
1843	SSL2.50CH04_61295784	SL2.50CH04	61295784	0.195	0.89158	0.10077	0.00765	0	0	0
1844	SSL2.50CH04_61314053	SL2.50CH04	61314053	0.194	0.8913	0.1087	0	0	0	0
1845	SSL2.50CH04_61379711	SL2.50CH04	61379711	0.127	0.93199	0.06801	0	0	0	0
1846	SSL2.50CH04_61395104	SL2.50CH04	61395104	0.066	0.96599	0.03401	0	0	0	0
1847	SSL2.50CH04_61431001	SL2.50CH04	61431001	0.141	0.92366	0.07634	0	0	0	0
1848	SSL2.50CH04_61561081	SL2.50CH04	61561081	0.206	0.88325	0.11675	0	0	0	0
1849	SSL2.50CH04_61637720	SL2.50CH04	61637720	0.233	0.86558	0.13191	0.00251	0	0	0
1850	SSL2.50CH04_61696663	SL2.50CH04	61696663	0.187	0.89573	0.10427	0	0	0	0
1851	SSL2.50CH04_61761982	SL2.50CH04	61761982	0.046	0.97625	0.02375	0	0	0	0
1852	SSL2.50CH04_61832505	SL2.50CH04	61832505	0.02	0.9899	0.0101	0	0	0	0
1853	SSL2.50CH04_61946116	SL2.50CH04	61946116	0.162	0.9108	0.0892	0	0	0	0
1854	SSL2.50CH04_62073756	SL2.50CH04	62073756	0.176	0.90226	0.09774	0	0	0	0
1855	SSL2.50CH04_62120256	SL2.50CH04	62120256	0.156	0.91476	0.08524	0	0	0	0
1856	SSL2.50CH04_62314503	SL2.50CH04	62314503	0.153	0.91646	0.08354	0	0	0	0
1857	SSL2.50CH04_62400001	SL2.50CH04	62400001	0.482	0.59572	0.40428	0	0	0	0
1858	SSL2.50CH04_62429656	SL2.50CH04	62429656	0.164	0.90977	0.09023	0	0	0	0
1859	SSL2.50CH04_62505371	SL2.50CH04	62505371	0.12	0.93593	0.06407	0	0	0	0
1860	SSL2.50CH04_62625294	SL2.50CH04	62625294	0.066	0.96599	0.03401	0	0	0	0
1861	SSL2.50CH04_62642314	SL2.50CH04	62642314	0.131	0.92985	0.06888	0.00128	0	0	0
1862	SSL2.50CH04_62658250	SL2.50CH04	62658250	0.142	0.92337	0.07663	0	0	0	0
1863	SSL2.50CH04_62722623	SL2.50CH04	62722623	0.162	0.91117	0.08883	0	0	0	0
1864	SSL2.50CH04_62805519	SL2.50CH04	62805519	0.182	0.8985	0.1015	0	0	0	0
1865	SSL2.50CH04_62821838	SL2.50CH04	62821838	0.16	0.91206	0.08794	0	0	0	0
1866	SSL2.50CH04_62837370	SL2.50CH04	62837370	0.124	0.93384	0.06616	0	0	0	0
1867	SSL2.50CH04_62859407	SL2.50CH04	62859407	0.283	0.82957	0.17043	0	0	0	0
1868	SSL2.50CH04_62881963	SL2.50CH04	62881963	0.136	0.9264	0.0736	0	0	0	0
1869	SSL2.50CH04_62966435	SL2.50CH04	62966435	0.185	0.89698	0.10302	0	0	0	0
1870	SSL2.50CH04_62984142	SL2.50CH04	62984142	0.49	0.56927	0.43073	0	0	0	0
1871	SSL2.50CH04_63005051	SL2.50CH04	63005051	0.124	0.93333	0.06667	0	0	0	0
1872	SSL2.50CH04_63074158	SL2.50CH04	63074158	0.149	0.91899	0.08101	0	0	0	0
1873	SSL2.50CH04_63103552	SL2.50CH04	63103552	0.149	0.91919	0.08081	0	0	0	0
1874	SSL2.50CH04_63146684	SL2.50CH04	63146684	0.027	0.98615	0.01385	0	0	0	0
1875	SSL2.50CH04_63162370	SL2.50CH04	63162370	0.194	0.89098	0.10902	0	0	0	0
1876	SSL2.50CH04_63202646	SL2.50CH04	63202646	0.191	0.89322	0.10678	0	0	0	0
1877	SSL2.50CH04_63309275	SL2.50CH04	63309275	0.146	0.92072	0.07928	0	0	0	0
1878	SSL2.50CH04_63365712	SL2.50CH04	63365712	0.173	0.90476	0.09398	0.00125	0	0	0
1879	SSL2.50CH04_63526362	SL2.50CH04	63526362	0.015	0.99246	0.00754	0	0	0	0
1880	SSL2.50CH04_63589937	SL2.50CH04	63589937	0.013	0.9937	0.0063	0	0	0	0
1881	SSL2.50CH04_63642928	SL2.50CH04	63642928	0.082	0.95739	0.04261	0	0	0	0
1882	SSL2.50CH04_63686588	SL2.50CH04	63686588	0.118	0.93718	0.06282	0	0	0	0
1883	SSL2.50CH04_63705746	SL2.50CH04	63705746	0.058	0.96985	0.03015	0	0	0	0
1884	SSL2.50CH04_63983164	SL2.50CH04	63983164	0.042	0.97859	0.02141	0	0	0	0
1885	SSL2.50CH04_64036606	SL2.50CH04	64036606	0.003	0.99873	0.00127	0	0	0	0
1886	SSL2.50CH04_64051829	SL2.50CH04	64051829	0.194	0.89098	0.10902	0	0	0	0
1887	SSL2.50CH04_64115673	SL2.50CH04	64115673	0.18	0.90025	0.09975	0	0	0	0
1888	SSL2.50CH04_64161719	SL2.50CH04	64161719	0.085	0.9557	0.0443	0	0	0	0
1889	SSL2.50CH04_64259982	SL2.50CH04	64259982	0.156	0.91479	0.08521	0	0	0	0
1890	SSL2.50CH04_64277242	SL2.50CH04	64277242	0.142	0.92317	0.07683	0	0	0	0
1891	SSL2.50CH04_64293981	SL2.50CH04	64293981	0.158	0.91332	0.08668	0	0	0	0
1892	SSL2.50CH04_64332665	SL2.50CH04	64332665	0.104	0.94517	0.05483	0	0	0	0
1893	SSL2.50CH04_64365114	SL2.50CH04	64365114	0.111	0.94095	0.05905	0	0	0	0
1894	SSL2.50CH04_64380312	SL2.50CH04	64380312	0.193	0.89196	0.10804	0	0	0	0
1895	SSL2.50CH04_64482826	SL2.50CH04	64482826	0.073	0.96212	0.03788	0	0	0	0
1896	SSL2.50CH04_64497837	SL2.50CH04	64497837	0.227	0.86935	0.13065	0	0	0	0
1897	SSL2.50CH04_64564887	SL2.50CH04	64564887	0.052	0.97328	0.02672	0	0	0	0
1898	SSL2.50CH04_64582447	SL2.50CH04	64582447	0.042	0.9787	0.0213	0	0	0	0
1899	SSL2.50CH04_64616442	SL2.50CH04	64616442	0.187	0.89573	0.10427	0	0	0	0
1900	SSL2.50CH04_64665402	SL2.50CH04	64665402	0.065	0.96617	0.03383	0	0	0	0
1901	SSL2.50CH04_64685097	SL2.50CH04	64685097	0.084	0.95603	0.04397	0	0	0	0
1902	SSL2.50CH04_64700236	SL2.50CH04	64700236	0.049	0.97487	0.02513	0	0	0	0
1903	SSL2.50CH04_64715630	SL2.50CH04	64715630	0.177	0.90176	0.09824	0	0	0	0
1904	SSL2.50CH04_64750890	SL2.50CH04	64750890	0.162	0.9108	0.0892	0	0	0	0
1905	SSL2.50CH04_64785033	SL2.50CH04	64785033	0.044	0.97739	0.02261	0	0	0	0
1906	SSL2.50CH04_64908974	SL2.50CH04	64908974	0.089	0.95328	0.04672	0	0	0	0
1907	SSL2.50CH04_64943147	SL2.50CH04	64943147	0.01	0.99492	0.00508	0	0	0	0
1908	SSL2.50CH04_64959932	SL2.50CH04	64959932	0.082	0.95718	0.04282	0	0	0	0
1909	SSL2.50CH04_65100267	SL2.50CH04	65100267	0.2	0.88722	0.11278	0	0	0	0
1910	SSL2.50CH04_65170917	SL2.50CH04	65170917	0.129	0.93095	0.06905	0	0	0	0
1911	SSL2.50CH04_65260755	SL2.50CH04	65260755	0.084	0.95614	0.04386	0	0	0	0
1912	SSL2.50CH04_65283813	SL2.50CH04	65283813	0.027	0.98618	0.01382	0	0	0	0
1913	SSL2.50CH04_65331845	SL2.50CH04	65331845	0.088	0.95396	0.04604	0	0	0	0
1914	SSL2.50CH04_65346856	SL2.50CH04	65346856	0.155	0.91519	0.08481	0	0	0	0
1915	SSL2.50CH04_65379851	SL2.50CH04	65379851	0.123	0.93411	0.06589	0	0	0	0
1916	SSL2.50CH04_65395342	SL2.50CH04	65395342	0.1	0.94724	0.05276	0	0	0	0
1917	SSL2.50CH04_65480783	SL2.50CH04	65480783	0.175	0.90327	0.09673	0	0	0	0
1918	SSL2.50CH04_65495840	SL2.50CH04	65495840	0.057	0.97089	0.02911	0	0	0	0
1919	SSL2.50CH04_65668208	SL2.50CH04	65668208	0.122	0.93467	0.06533	0	0	0	0
1920	SSL2.50CH04_65714458	SL2.50CH04	65714458	0.225	0.87093	0.12907	0	0	0	0
1921	SSL2.50CH04_65729546	SL2.50CH04	65729546	0.195	0.8907	0.1093	0	0	0	0
1922	SSL2.50CH04_65779502	SL2.50CH04	65779502	0.084	0.95592	0.04408	0	0	0	0
1923	SSL2.50CH04_65846242	SL2.50CH04	65846242	0.077	0.9597	0.0403	0	0	0	0
1924	SSL2.50CH04_65897656	SL2.50CH04	65897656	0.097	0.94862	0.05138	0	0	0	0
1925	SSL2.50CH04_65943618	SL2.50CH04	65943618	0.158	0.91327	0.08673	0	0	0	0
1926	SSL2.50CH04_65994820	SL2.50CH04	65994820	0.43	0.68687	0.31313	0	0	0	0
1927	SSL2.50CH04_66025161	SL2.50CH04	66025161	0.2	0.88734	0.11266	0	0	0	0
1928	SSL2.50CH04_66040297	SL2.50CH04	66040297	0.165	0.90955	0.09045	0	0	0	0
1929	SSL2.50CH04_66057525	SL2.50CH04	66057525	0.187	0.89547	0.10453	0	0	0	0
1930	SSL2.50CH04_66072555	SL2.50CH04	66072555	0.064	0.96717	0.0303	0.00253	0	0	0
1931	SSL2.50CH04_66087895	SL2.50CH04	66087895	0.11	0.94148	0.05852	0	0	0	0
1932	SSL2.50CH04_66152699	SL2.50CH04	66152699	0.196	0.89015	0.10985	0	0	0	0
1933	SSL2.50CH04_66202763	SL2.50CH04	66202763	0.11	0.94236	0.04511	0.01253	0	0	0
1934	SSL2.50CH04_66237156	SL2.50CH04	66237156	0.078	0.95949	0.04051	0	0	0	0
1935	SSL2.50CH04_66252911	SL2.50CH04	66252911	0.091	0.95214	0.04786	0	0	0	0
1936	SSL2.50CH04_66304566	SL2.50CH04	66304566	0.093	0.95113	0.04887	0	0	0	0
1937	SSL2.50CH04_66334705	SL2.50CH04	66334705	0.052	0.97355	0.02645	0	0	0	0
1938	SSL2.50CH04_66365143	SL2.50CH04	66365143	0.165	0.90932	0.09068	0	0	0	0
1939	SSL2.50CH04_66401549	SL2.50CH04	66401549	0.177	0.90201	0.09799	0	0	0	0
1940	SSL2.50CH05_2874	SL2.50CH05	2874	0.111	0.9411	0.0589	0	0	0	0
1941	SSL2.50CH05_87257	SL2.50CH05	87257	0.153	0.91667	0.08333	0	0	0	0
1942	SSL2.50CH05_123848	SL2.50CH05	123848	0.04	0.97978	0.02022	0	0	0	0
1943	SSL2.50CH05_264939	SL2.50CH05	264939	0.008	0.99622	0.00378	0	0	0	0
1944	SSL2.50CH05_327518	SL2.50CH05	327518	0.112	0.94036	0.05964	0	0	0	0
1945	SSL2.50CH05_358792	SL2.50CH05	358792	0.156	0.91479	0.08521	0	0	0	0
1946	SSL2.50CH05_380926	SL2.50CH05	380926	0.085	0.95592	0.03401	0.01008	0	0	0
1947	SSL2.50CH05_403621	SL2.50CH05	403621	0.15	0.91834	0.08166	0	0	0	0
1948	SSL2.50CH05_420030	SL2.50CH05	420030	0.066	0.96599	0.03401	0	0	0	0
1949	SSL2.50CH05_452509	SL2.50CH05	452509	0.16	0.91206	0.08794	0	0	0	0
1950	SSL2.50CH05_468502	SL2.50CH05	468502	0.164	0.90977	0.09023	0	0	0	0
1951	SSL2.50CH05_495391	SL2.50CH05	495391	0.152	0.91688	0.08312	0	0	0	0
1952	SSL2.50CH05_553745	SL2.50CH05	553745	0.162	0.9108	0.0892	0	0	0	0
1953	SSL2.50CH05_575244	SL2.50CH05	575244	0.156	0.91479	0.08521	0	0	0	0
1954	SSL2.50CH05_596538	SL2.50CH05	596538	0.461	0.63945	0.36055	0	0	0	0
1955	SSL2.50CH05_626770	SL2.50CH05	626770	0.137	0.92607	0.07393	0	0	0	0
1956	SSL2.50CH05_730738	SL2.50CH05	730738	0.21	0.88065	0.11935	0	0	0	0
1957	SSL2.50CH05_746051	SL2.50CH05	746051	0.192	0.89241	0.10759	0	0	0	0
1958	SSL2.50CH05_810185	SL2.50CH05	810185	0.039	0.9799	0.0201	0	0	0	0
1959	SSL2.50CH05_967227	SL2.50CH05	967227	0.114	0.93955	0.06045	0	0	0	0
1960	SSL2.50CH05_990309	SL2.50CH05	990309	0.165	0.90932	0.09068	0	0	0	0
1961	SSL2.50CH05_1017509	SL2.50CH05	1017509	0.161	0.91184	0.08816	0	0	0	0
1962	SSL2.50CH05_1056123	SL2.50CH05	1056123	0.127	0.93199	0.06801	0	0	0	0
1963	SSL2.50CH05_1121685	SL2.50CH05	1121685	0.13	0.93029	0.06971	0	0	0	0
1964	SSL2.50CH05_1358814	SL2.50CH05	1358814	0.146	0.92085	0.07915	0	0	0	0
1965	SSL2.50CH05_1531954	SL2.50CH05	1531954	0.051	0.97368	0.02632	0	0	0	0
1966	SSL2.50CH05_1547964	SL2.50CH05	1547964	0.16	0.91206	0.08794	0	0	0	0
1967	SSL2.50CH05_1638819	SL2.50CH05	1638819	0.168	0.90727	0.09273	0	0	0	0
1968	SSL2.50CH05_1813913	SL2.50CH05	1813913	0.158	0.91332	0.08668	0	0	0	0
1969	SSL2.50CH05_1860363	SL2.50CH05	1860363	0.466	0.63098	0.36902	0	0	0	0
1970	SSL2.50CH05_1920795	SL2.50CH05	1920795	0.166	0.90852	0.09148	0	0	0	0
1971	SSL2.50CH05_1943054	SL2.50CH05	1943054	0.127	0.93165	0.06835	0	0	0	0
1972	SSL2.50CH05_1985914	SL2.50CH05	1985914	0.056	0.97096	0.02904	0	0	0	0
1973	SSL2.50CH05_2044374	SL2.50CH05	2044374	0.15	0.91814	0.08186	0	0	0	0
1974	SSL2.50CH05_2152107	SL2.50CH05	2152107	0.126	0.93233	0.06767	0	0	0	0
1975	SSL2.50CH05_2167211	SL2.50CH05	2167211	0.172	0.90508	0.09492	0	0	0	0
1976	SSL2.50CH05_2213736	SL2.50CH05	2213736	0.103	0.94571	0.05429	0	0	0	0
1977	SSL2.50CH05_2250423	SL2.50CH05	2250423	0.005	0.99749	0.00251	0	0	0	0
1978	SSL2.50CH05_2319722	SL2.50CH05	2319722	0.166	0.90852	0.09148	0	0	0	0
1979	SSL2.50CH05_2673180	SL2.50CH05	2673180	0.05	0.97455	0.02545	0	0	0	0
1980	SSL2.50CH05_2688354	SL2.50CH05	2688354	0.165	0.90955	0.09045	0	0	0	0
1981	SSL2.50CH05_2769976	SL2.50CH05	2769976	0.035	0.98241	0.01759	0	0	0	0
1982	SSL2.50CH05_2831390	SL2.50CH05	2831390	0.068	0.96482	0.03518	0	0	0	0
1983	SSL2.50CH05_2861853	SL2.50CH05	2861853	0.068	0.96482	0.03518	0	0	0	0
1984	SSL2.50CH05_2880735	SL2.50CH05	2880735	0.107	0.94347	0.05653	0	0	0	0
1985	SSL2.50CH05_2913407	SL2.50CH05	2913407	0.177	0.90201	0.09799	0	0	0	0
1986	SSL2.50CH05_2928968	SL2.50CH05	2928968	0.121	0.93511	0.06489	0	0	0	0
1987	SSL2.50CH05_2996832	SL2.50CH05	2996832	0.037	0.98116	0.01884	0	0	0	0
1988	SSL2.50CH05_3012180	SL2.50CH05	3012180	0.122	0.93467	0.06533	0	0	0	0
1989	SSL2.50CH05_3126541	SL2.50CH05	3126541	0.193	0.89196	0.10804	0	0	0	0
1990	SSL2.50CH05_3220013	SL2.50CH05	3220013	0.134	0.92803	0.07197	0	0	0	0
1991	SSL2.50CH05_3238709	SL2.50CH05	3238709	0.1	0.94724	0.05276	0	0	0	0
1992	SSL2.50CH05_3254034	SL2.50CH05	3254034	0.104	0.94472	0.05528	0	0	0	0
1993	SSL2.50CH05_3316063	SL2.50CH05	3316063	0.178	0.90152	0.09848	0	0	0	0
1994	SSL2.50CH05_3331503	SL2.50CH05	3331503	0.183	0.89824	0.10176	0	0	0	0
1995	SSL2.50CH05_3367902	SL2.50CH05	3367902	0.187	0.89573	0.10427	0	0	0	0
1996	SSL2.50CH05_3383985	SL2.50CH05	3383985	0.152	0.91729	0.08271	0	0	0	0
1997	SSL2.50CH05_3413809	SL2.50CH05	3413809	0.074	0.96154	0.03846	0	0	0	0
[truncated: 2,579 more rows]

## Sheet: Supplementary Table S7
Supplementary Table S7: PIC values of the whole SNPs identified in the eggplant genepool
Site Number	Site Name	Chromosome	Physical Position	PIC	Major Allele Frequency	Minor Allele Frequency	Allele 3 Frequency	Allele 4 Frequency	Allele 5 Frequency	Allele 6 Frequency
0	SSMEL3CH01_131929	SMEL3CH01	131929	0.318	0.80191	0.19809	0	0	0	0
1	SSMEL3CH01_131952	SMEL3CH01	131952	0.002	0.99881	0.00119	0	0	0	0
2	SSMEL3CH01_131982	SMEL3CH01	131982	0.184	0.89737	0.10263	0	0	0	0
3	SSMEL3CH01_131994	SMEL3CH01	131994	0.007	0.99642	0.00358	0	0	0	0
4	SSMEL3CH01_154832	SMEL3CH01	154832	0.005	0.99762	0.00238	0	0	0	0
5	SSMEL3CH01_154835	SMEL3CH01	154835	0.009	0.99524	0.00476	0	0	0	0
6	SSMEL3CH01_154841	SMEL3CH01	154841	0.358	0.76611	0.23389	0	0	0	0
7	SSMEL3CH01_154843	SMEL3CH01	154843	0.014	0.99286	0.00714	0	0	0	0
8	SSMEL3CH01_154848	SMEL3CH01	154848	0.005	0.99762	0.00238	0	0	0	0
9	SSMEL3CH01_154861	SMEL3CH01	154861	0.005	0.99761	0.00239	0	0	0	0
10	SSMEL3CH01_154875	SMEL3CH01	154875	0.005	0.99761	0.00239	0	0	0	0
11	SSMEL3CH01_154884	SMEL3CH01	154884	0.005	0.99762	0.00238	0	0	0	0
12	SSMEL3CH01_154897	SMEL3CH01	154897	0.005	0.99762	0.00238	0	0	0	0
13	SSMEL3CH01_154910	SMEL3CH01	154910	0.005	0.99762	0.00238	0	0	0	0
14	SSMEL3CH01_154913	SMEL3CH01	154913	0.009	0.99524	0.00476	0	0	0	0
15	SSMEL3CH01_209320	SMEL3CH01	209320	0.337	0.80191	0.10024	0.09785	0	0	0
16	SSMEL3CH01_265550	SMEL3CH01	265550	0.005	0.99761	0.00239	0	0	0	0
17	SSMEL3CH01_265551	SMEL3CH01	265551	0.312	0.80622	0.19378	0	0	0	0
18	SSMEL3CH01_265555	SMEL3CH01	265555	0.005	0.99761	0.00239	0	0	0	0
19	SSMEL3CH01_265566	SMEL3CH01	265566	0.211	0.88038	0.11962	0	0	0	0
20	SSMEL3CH01_265568	SMEL3CH01	265568	0.005	0.99761	0.00239	0	0	0	0
21	SSMEL3CH01_265580	SMEL3CH01	265580	0.005	0.99761	0.00239	0	0	0	0
22	SSMEL3CH01_265611	SMEL3CH01	265611	0.155	0.91507	0.08493	0	0	0	0
23	SSMEL3CH01_265612	SMEL3CH01	265612	0.155	0.91507	0.08493	0	0	0	0
24	SSMEL3CH01_265632	SMEL3CH01	265632	0.002	0.9988	0.0012	0	0	0	0
25	SSMEL3CH01_495021	SMEL3CH01	495021	0.291	0.82297	0.17703	0	0	0	0
26	SSMEL3CH01_495042	SMEL3CH01	495042	0.014	0.99284	0.00716	0	0	0	0
27	SSMEL3CH01_495054	SMEL3CH01	495054	0.042	0.97852	0.02148	0	0	0	0
28	SSMEL3CH01_495091	SMEL3CH01	495091	0.005	0.99761	0.00239	0	0	0	0
29	SSMEL3CH01_495092	SMEL3CH01	495092	0.06	0.96897	0.03103	0	0	0	0
30	SSMEL3CH01_495108	SMEL3CH01	495108	0.005	0.99761	0.00239	0	0	0	0
31	SSMEL3CH01_510967	SMEL3CH01	510967	0.315	0.8043	0.1957	0	0	0	0
32	SSMEL3CH01_510985	SMEL3CH01	510985	0.005	0.99761	0.00239	0	0	0	0
33	SSMEL3CH01_510994	SMEL3CH01	510994	0.009	0.99523	0.00477	0	0	0	0
34	SSMEL3CH01_511012	SMEL3CH01	511012	0.005	0.99761	0.00239	0	0	0	0
35	SSMEL3CH01_511016	SMEL3CH01	511016	0.005	0.99761	0.00239	0	0	0	0
36	SSMEL3CH01_525647	SMEL3CH01	525647	0.204	0.88452	0.11548	0	0	0	0
37	SSMEL3CH01_525657	SMEL3CH01	525657	0.051	0.97381	0.02619	0	0	0	0
38	SSMEL3CH01_525670	SMEL3CH01	525670	0.009	0.99524	0.00476	0	0	0	0
39	SSMEL3CH01_525705	SMEL3CH01	525705	0.005	0.99762	0.00238	0	0	0	0
40	SSMEL3CH01_525730	SMEL3CH01	525730	0.173	0.90431	0.09569	0	0	0	0
41	SSMEL3CH01_663715	SMEL3CH01	663715	0.221	0.87381	0.12619	0	0	0	0
42	SSMEL3CH01_663723	SMEL3CH01	663723	0.014	0.99286	0.00714	0	0	0	0
43	SSMEL3CH01_663736	SMEL3CH01	663736	0.005	0.99762	0.00238	0	0	0	0
44	SSMEL3CH01_663737	SMEL3CH01	663737	0.304	0.8131	0.1869	0	0	0	0
45	SSMEL3CH01_663739	SMEL3CH01	663739	0.159	0.9131	0.0869	0	0	0	0
46	SSMEL3CH01_683014	SMEL3CH01	683014	0.257	0.84834	0.15166	0	0	0	0
47	SSMEL3CH01_683018	SMEL3CH01	683018	0.002	0.99882	0.00118	0	0	0	0
48	SSMEL3CH01_683038	SMEL3CH01	683038	0.007	0.99645	0.00355	0	0	0	0
49	SSMEL3CH01_683042	SMEL3CH01	683042	0.258	0.84834	0.1481	0.00355	0	0	0
50	SSMEL3CH01_683051	SMEL3CH01	683051	0.016	0.99171	0.00829	0	0	0	0
51	SSMEL3CH01_683052	SMEL3CH01	683052	0.007	0.99645	0.00355	0	0	0	0
52	SSMEL3CH01_683074	SMEL3CH01	683074	0.002	0.99882	0.00118	0	0	0	0
53	SSMEL3CH01_683083	SMEL3CH01	683083	0.225	0.87085	0.12796	0.00118	0	0	0
54	SSMEL3CH01_703613	SMEL3CH01	703613	0.239	0.86124	0.13876	0	0	0	0
55	SSMEL3CH01_703635	SMEL3CH01	703635	0.256	0.84928	0.15072	0	0	0	0
56	SSMEL3CH01_753880	SMEL3CH01	753880	0.488	0.57656	0.42344	0	0	0	0
57	SSMEL3CH01_753901	SMEL3CH01	753901	0.021	0.98926	0.01074	0	0	0	0
58	SSMEL3CH01_753922	SMEL3CH01	753922	0.005	0.99761	0.00239	0	0	0	0
59	SSMEL3CH01_753924	SMEL3CH01	753924	0.169	0.90692	0.09308	0	0	0	0
60	SSMEL3CH01_753930	SMEL3CH01	753930	0.005	0.99761	0.00239	0	0	0	0
61	SSMEL3CH01_753931	SMEL3CH01	753931	0.005	0.99761	0.00239	0	0	0	0
62	SSMEL3CH01_753933	SMEL3CH01	753933	0.047	0.97613	0.02387	0	0	0	0
63	SSMEL3CH01_753944	SMEL3CH01	753944	0.23	0.86722	0.13278	0	0	0	0
64	SSMEL3CH01_753945	SMEL3CH01	753945	0.042	0.97852	0.02148	0	0	0	0
65	SSMEL3CH01_753957	SMEL3CH01	753957	0.058	0.9701	0.02153	0.00837	0	0	0
66	SSMEL3CH01_1053533	SMEL3CH01	1053533	0.322	0.79833	0.20167	0	0	0	0
67	SSMEL3CH01_1053551	SMEL3CH01	1053551	0.042	0.97852	0.02148	0	0	0	0
68	SSMEL3CH01_1053553	SMEL3CH01	1053553	0.009	0.99523	0.00477	0	0	0	0
69	SSMEL3CH01_1053559	SMEL3CH01	1053559	0.014	0.99284	0.00716	0	0	0	0
70	SSMEL3CH01_1053575	SMEL3CH01	1053575	0.242	0.85919	0.14081	0	0	0	0
71	SSMEL3CH01_1053593	SMEL3CH01	1053593	0.207	0.88305	0.11695	0	0	0	0
72	SSMEL3CH01_1053630	SMEL3CH01	1053630	0.005	0.99761	0.00239	0	0	0	0
73	SSMEL3CH01_1233911	SMEL3CH01	1233911	0.218	0.8753	0.1247	0	0	0	0
74	SSMEL3CH01_1233917	SMEL3CH01	1233917	0.002	0.99879	0.00121	0	0	0	0
75	SSMEL3CH01_1268571	SMEL3CH01	1268571	0.351	0.77327	0.22673	0	0	0	0
76	SSMEL3CH01_1268573	SMEL3CH01	1268573	0.014	0.99284	0.00716	0	0	0	0
77	SSMEL3CH01_1268575	SMEL3CH01	1268575	0.009	0.99523	0.00477	0	0	0	0
78	SSMEL3CH01_1268581	SMEL3CH01	1268581	0.165	0.90931	0.09069	0	0	0	0
79	SSMEL3CH01_1268587	SMEL3CH01	1268587	0.009	0.99523	0.00477	0	0	0	0
80	SSMEL3CH01_1268599	SMEL3CH01	1268599	0.218	0.8756	0.1244	0	0	0	0
81	SSMEL3CH01_1268632	SMEL3CH01	1268632	0.009	0.99523	0.00477	0	0	0	0
82	SSMEL3CH01_1268636	SMEL3CH01	1268636	0.005	0.99761	0.00239	0	0	0	0
83	SSMEL3CH01_1268645	SMEL3CH01	1268645	0.005	0.99761	0.00239	0	0	0	0
84	SSMEL3CH01_1268649	SMEL3CH01	1268649	0.005	0.99761	0.00239	0	0	0	0
85	SSMEL3CH01_1306282	SMEL3CH01	1306282	0.221	0.87381	0.12619	0	0	0	0
86	SSMEL3CH01_1306291	SMEL3CH01	1306291	0.299	0.81667	0.18333	0	0	0	0
87	SSMEL3CH01_1306315	SMEL3CH01	1306315	0.009	0.99524	0.00476	0	0	0	0
88	SSMEL3CH01_1306367	SMEL3CH01	1306367	0.106	0.94378	0.05622	0	0	0	0
89	SSMEL3CH01_1394835	SMEL3CH01	1394835	0.423	0.6957	0.3043	0	0	0	0
90	SSMEL3CH01_1394879	SMEL3CH01	1394879	0.014	0.99286	0.00714	0	0	0	0
91	SSMEL3CH01_1394882	SMEL3CH01	1394882	0.014	0.99286	0.00714	0	0	0	0
92	SSMEL3CH01_1419780	SMEL3CH01	1419780	0.382	0.74282	0.25718	0	0	0	0
93	SSMEL3CH01_1419807	SMEL3CH01	1419807	0.014	0.99282	0.00718	0	0	0	0
94	SSMEL3CH01_1419813	SMEL3CH01	1419813	0.216	0.87679	0.12321	0	0	0	0
95	SSMEL3CH01_1437677	SMEL3CH01	1437677	0.205	0.88425	0.11575	0	0	0	0
96	SSMEL3CH01_1437681	SMEL3CH01	1437681	0.002	0.99881	0.00119	0	0	0	0
97	SSMEL3CH01_1437683	SMEL3CH01	1437683	0.002	0.99881	0.00119	0	0	0	0
98	SSMEL3CH01_1437695	SMEL3CH01	1437695	0.385	0.73986	0.26014	0	0	0	0
99	SSMEL3CH01_1437710	SMEL3CH01	1437710	0.002	0.99881	0.00119	0	0	0	0
100	SSMEL3CH01_1437722	SMEL3CH01	1437722	0.211	0.88038	0.11962	0	0	0	0
101	SSMEL3CH01_1437725	SMEL3CH01	1437725	0.002	0.99881	0.00119	0	0	0	0
102	SSMEL3CH01_1437732	SMEL3CH01	1437732	0.012	0.99403	0.00597	0	0	0	0
103	SSMEL3CH01_1437757	SMEL3CH01	1437757	0.151	0.91787	0.08213	0	0	0	0
104	SSMEL3CH01_1437760	SMEL3CH01	1437760	0.042	0.97852	0.02148	0	0	0	0
105	SSMEL3CH01_1437765	SMEL3CH01	1437765	0.152	0.91707	0.08293	0	0	0	0
106	SSMEL3CH01_1446429	SMEL3CH01	1446429	0.392	0.7327	0.2673	0	0	0	0
107	SSMEL3CH01_1446459	SMEL3CH01	1446459	0.04	0.97971	0.02029	0	0	0	0
108	SSMEL3CH01_1646655	SMEL3CH01	1646655	0.224	0.87173	0.12589	0.00238	0	0	0
109	SSMEL3CH01_1646665	SMEL3CH01	1646665	0.005	0.99762	0.00238	0	0	0	0
110	SSMEL3CH01_1646671	SMEL3CH01	1646671	0.005	0.99762	0.00238	0	0	0	0
111	SSMEL3CH01_1646684	SMEL3CH01	1646684	0.005	0.99762	0.00238	0	0	0	0
112	SSMEL3CH01_1646688	SMEL3CH01	1646688	0.042	0.97857	0.02143	0	0	0	0
113	SSMEL3CH01_1646726	SMEL3CH01	1646726	0.005	0.99762	0.00238	0	0	0	0
114	SSMEL3CH01_1646745	SMEL3CH01	1646745	0.014	0.99286	0.00714	0	0	0	0
115	SSMEL3CH01_1646749	SMEL3CH01	1646749	0.234	0.86451	0.13549	0	0	0	0
116	SSMEL3CH01_1719623	SMEL3CH01	1719623	0.45	0.65833	0.34167	0	0	0	0
117	SSMEL3CH01_1719624	SMEL3CH01	1719624	0.009	0.99524	0.00476	0	0	0	0
118	SSMEL3CH01_1719627	SMEL3CH01	1719627	0.005	0.99762	0.00238	0	0	0	0
119	SSMEL3CH01_1719630	SMEL3CH01	1719630	0.005	0.99762	0.00238	0	0	0	0
120	SSMEL3CH01_1719685	SMEL3CH01	1719685	0.024	0.9881	0.0119	0	0	0	0
121	SSMEL3CH01_1742573	SMEL3CH01	1742573	0.009	0.99524	0.00238	0.00238	0	0	0
122	SSMEL3CH01_1742574	SMEL3CH01	1742574	0.208	0.88214	0.11786	0	0	0	0
123	SSMEL3CH01_1742579	SMEL3CH01	1742579	0.014	0.99286	0.00714	0	0	0	0
124	SSMEL3CH01_1742590	SMEL3CH01	1742590	0.005	0.99762	0.00238	0	0	0	0
125	SSMEL3CH01_1742598	SMEL3CH01	1742598	0.477	0.60621	0.39379	0	0	0	0
126	SSMEL3CH01_1742609	SMEL3CH01	1742609	0.182	0.89881	0.10119	0	0	0	0
127	SSMEL3CH01_1742610	SMEL3CH01	1742610	0.005	0.99762	0.00238	0	0	0	0
128	SSMEL3CH01_1742611	SMEL3CH01	1742611	0.049	0.975	0.02143	0.00357	0	0	0
129	SSMEL3CH01_1742626	SMEL3CH01	1742626	0.014	0.99286	0.00714	0	0	0	0
[truncated: 30,601 more rows]

## Sheet: Supplementary Table S8
Supplementary Table S8: PIC values of the target SNPs identified in the eggplant genepool
[truncated: 4,629 more rows]
